# Supplementary material for: Ionization selectivity of electrospray and atmospheric pressure photoionization FT-ICR MS for petroleum refinery wastewater dissolved organic matter
Source: Royal Society of Chemistry journal article supplement (doi:10.1039/d1em00248a), 2021-01-01
Supplement: d1em00248a1.xlsx [file d1em00248a1.xlsx]

## Sheet: RWDOM-(-)ESI
m/z	intensity	Formula	C	H	N	O	S
152.054	3287196	C8H11N1O0S1	8	11	1	0	1
152.072	5492667	C8H11N1O2S0	8	11	1	2	0
153.001	5582187	C7H6N0O2S1	7	6	0	2	1
153.019	3656586	C7H6N0O4S0	7	6	0	4	0
153.038	4877644	C8H10N0O1S1	8	10	0	1	1
153.056	7043748	C8H10N0O3S0	8	10	0	3	0
153.092	5857316	C9H14N0O2S0	9	14	0	2	0
154.033	4602843	C7H9N1O1S1	7	9	1	1	1
154.981	2753610	C6H4N0O3S1	6	4	0	3	1
155.017	6149360	C7H8N0O2S1	7	8	0	2	1
155.035	3297638	C7H8N0O4S0	7	8	0	4	0
155.108	4197464	C9H16N0O2S0	9	16	0	2	0
156.996	7278733	C6H6N0O3S1	6	6	0	3	1
157.033	2674072	C7H10N0O2S1	7	10	0	2	1
157.066	9836125	C11H10N0O1S0	11	10	0	1	0
158.028	3388227	C6H9N1O2S1	6	9	1	2	1
158.061	5117301	C10H9N1O1S0	10	9	1	1	0
158.097	2751355	C11H13N1O0S0	11	13	1	0	0
159.045	8447000	C10H8N0O2S0	10	8	0	2	0
159.081	15212070	C11H12N0O1S0	11	12	0	1	0
160.04	6318849	C9H7N1O2S0	9	7	1	2	0
160.077	10248954	C10H11N1O1S0	10	11	1	1	0
161.024	4398492	C9H6N0O3S0	9	6	0	3	0
161.036	2748675	C8H6N2O2S0	8	6	2	2	0
161.061	23655728	C10H10N0O2S0	10	10	0	2	0
161.097	28234636	C11H14N0O1S0	11	14	0	1	0
162.038	3036240	C9H9N1O0S1	9	9	1	0	1
162.056	11569928	C9H9N1O2S0	9	9	1	2	0
162.092	9547753	C10H13N1O1S0	10	13	1	1	0
163.022	4410615	C9H8N0O1S1	9	8	0	1	1
163.04	19418117	C9H8N0O3S0	9	8	0	3	0
163.043	2669192	C6H12N0O3S1	6	12	0	3	1
163.051	2998903	C8H8N2O2S0	8	8	2	2	0
163.076	36265867	C10H12N0O2S0	10	12	0	2	0
163.113	37713489	C11H16N0O1S0	11	16	0	1	0
164.018	5435645	C8H7N1O1S1	8	7	1	1	1
164.035	5363459	C8H7N1O3S0	8	7	1	3	0
164.054	2644225	C9H11N1O0S1	9	11	1	0	1
164.072	11257983	C9H11N1O2S0	9	11	1	2	0
164.108	3614836	C10H15N1O1S0	10	15	1	1	0
165.002	3217085	C8H6N0O2S1	8	6	0	2	1
165.019	6378903	C8H6N0O4S0	8	6	0	4	0
165.038	5794544	C9H10N0O1S1	9	10	0	1	1
165.056	30318442	C9H10N0O3S0	9	10	0	3	0
165.067	3185352	C8H10N2O2S0	8	10	2	2	0
165.092	29544062	C10H14N0O2S0	10	14	0	2	0
165.103	3492588	C9H14N2O1S0	9	14	2	1	0
165.128	53593938	C11H18N0O1S0	11	18	0	1	0
166.033	3254866	C8H9N1O1S1	8	9	1	1	1
166.051	7621935	C8H9N1O3S0	8	9	1	3	0
166.087	5837675	C9H13N1O2S0	9	13	1	2	0
166.981	2658468	C7H4N0O3S1	7	4	0	3	1
167.017	10742984	C8H8N0O2S1	8	8	0	2	1
167.035	14833691	C8H8N0O4S0	8	8	0	4	0
167.05	3412362	C12H8N0O1S0	12	8	0	1	0
167.054	4866110	C9H12N0O1S1	9	12	0	1	1
167.071	15408256	C9H12N0O3S0	9	12	0	3	0
167.108	17642277	C10H16N0O2S0	10	16	0	2	0
167.144	3844299	C11H20N0O1S0	11	20	0	1	0
168.012	5266300	C7H7N1O2S1	7	7	1	2	1
168.03	2895179	C7H7N1O4S0	7	7	1	4	0
168.049	4426570	C8H11N1O1S1	8	11	1	1	1
168.067	3640681	C8H11N1O3S0	8	11	1	3	0
168.996	9323964	C7H6N0O3S1	7	6	0	3	1
169.014	3606871	C7H6N0O5S0	7	6	0	5	0
169.033	7774131	C8H10N0O2S1	8	10	0	2	1
169.051	5682734	C8H10N0O4S0	8	10	0	4	0
169.066	3763638	C12H10N0O1S0	12	10	0	1	0
169.087	8950374	C9H14N0O3S0	9	14	0	3	0
169.123	9309246	C10H18N0O2S0	10	18	0	2	0
170.028	6376635	C7H9N1O2S1	7	9	1	2	1
170.046	2926314	C7H9N1O4S0	7	9	1	4	0
170.064	2685131	C8H13N1O1S1	8	13	1	1	1
170.097	4192758	C12H13N1O0S0	12	13	1	0	0
170.958	3510357	C6H4N0O2S2	6	4	0	2	2
171.009	2795674	C10H4N0O3S0	10	4	0	3	0
171.012	13930609	C7H8N0O3S1	7	8	0	3	1
171.03	3588836	C7H8N0O5S0	7	8	0	5	0
171.045	4397778	C11H8N0O2S0	11	8	0	2	0
171.081	20742203	C12H12N0O1S0	12	12	0	1	0
171.103	4308133	C9H16N0O3S0	9	16	0	3	0
172.04	2814634	C10H7N1O2S0	10	7	1	2	0
172.077	11197035	C11H11N1O1S0	11	11	1	1	0
172.113	4110124	C12H15N1O0S0	12	15	1	0	0
172.974	4212634	C6H6N0O2S2	6	6	0	2	2
173.024	3156099	C10H6N0O3S0	10	6	0	3	0
173.028	3279244	C7H10N0O3S1	7	10	0	3	1
173.061	29258955	C11H10N0O2S0	11	10	0	2	0
173.072	4300870	C10H10N2O1S0	10	10	2	1	0
173.097	33344931	C12H14N0O1S0	12	14	0	1	0
174.038	3201468	C10H9N1O0S1	10	9	1	0	1
174.056	14634498	C10H9N1O2S0	10	9	1	2	0
174.092	13052384	C11H13N1O1S0	11	13	1	1	0
174.129	3015583	C12H17N1O0S0	12	17	1	0	0
175.022	4338363	C10H8N0O1S1	10	8	0	1	1
175.04	25122380	C10H8N0O3S0	10	8	0	3	0
175.043	18055893	C7H12N0O3S1	7	12	0	3	1
175.051	4848107	C9H8N2O2S0	9	8	2	2	0
175.076	49549488	C11H12N0O2S0	11	12	0	2	0
175.088	3690832	C10H12N2O1S0	10	12	2	1	0
175.113	49108757	C12H16N0O1S0	12	16	0	1	0
176.035	9370201	C9H7N1O3S0	9	7	1	3	0
176.054	4043183	C10H11N1O0S1	10	11	1	0	1
176.072	22050243	C10H11N1O2S0	10	11	1	2	0
176.108	9274350	C11H15N1O1S0	11	15	1	1	0
177.002	5228870	C9H6N0O2S1	9	6	0	2	1
177.019	9931612	C9H6N0O4S0	9	6	0	4	0
177.038	8330197	C10H10N0O1S1	10	10	0	1	1
177.056	39664204	C10H10N0O3S0	10	10	0	3	0
177.059	5299030	C7H14N0O3S1	7	14	0	3	1
177.067	6048046	C9H10N2O2S0	9	10	2	2	0
177.092	61989052	C11H14N0O2S0	11	14	0	2	0
177.103	3115454	C10H14N2O1S0	10	14	2	1	0
177.128	89168172	C12H18N0O1S0	12	18	0	1	0
177.997	3309092	C8H5N1O2S1	8	5	1	2	1
178.033	7597065	C9H9N1O1S1	9	9	1	1	1
178.051	12377218	C9H9N1O3S0	9	9	1	3	0
178.087	15480439	C10H13N1O2S0	10	13	1	2	0
178.124	6848940	C11H17N1O1S0	11	17	1	1	0
178.981	2786847	C8H4N0O3S1	8	4	0	3	1
179.017	10275544	C9H8N0O2S1	9	8	0	2	1
179.035	14258451	C9H8N0O4S0	9	8	0	4	0
179.038	2929630	C6H12N0O4S1	6	12	0	4	1
179.046	4458424	C8H8N2O3S0	8	8	2	3	0
179.054	4691825	C10H12N0O1S1	10	12	0	1	1
179.071	39226252	C10H12N0O3S0	10	12	0	3	0
179.083	5542962	C9H12N2O2S0	9	12	2	2	0
179.108	44517381	C11H16N0O2S0	11	16	0	2	0
179.144	63864959	C12H20N0O1S0	12	20	0	1	0
180.012	8031870	C8H7N1O2S1	8	7	1	2	1
180.03	4555195	C8H7N1O4S0	8	7	1	4	0
180.049	5301116	C9H11N1O1S1	9	11	1	1	1
180.067	14679353	C9H11N1O3S0	9	11	1	3	0
180.082	2826509	C13H11N1O0S0	13	11	1	0	0
180.103	8329782	C10H15N1O2S0	10	15	1	2	0
180.996	7193509	C8H6N0O3S1	8	6	0	3	1
181.014	3740516	C8H6N0O5S0	8	6	0	5	0
181.033	13951078	C9H10N0O2S1	9	10	0	2	1
181.051	17394212	C9H10N0O4S0	9	10	0	4	0
181.062	3893420	C8H10N2O3S0	8	10	2	3	0
181.066	11621210	C13H10N0O1S0	13	10	0	1	0
181.069	4995686	C10H14N0O1S1	10	14	0	1	1
181.087	37737637	C10H14N0O3S0	10	14	0	3	0
181.098	3556269	C9H14N2O2S0	9	14	2	2	0
181.123	44710182	C11H18N0O2S0	11	18	0	2	0
181.16	7173863	C12H22N0O1S0	12	22	0	1	0
182.028	10077649	C8H9N1O2S1	8	9	1	2	1
182.046	3144290	C8H9N1O4S0	8	9	1	4	0
182.061	6650441	C12H9N1O1S0	12	9	1	1	0
182.064	3228733	C9H13N1O1S1	9	13	1	1	1
182.082	8118677	C9H13N1O3S0	9	13	1	3	0
182.098	5057869	C13H13N1O0S0	13	13	1	0	0
182.976	3202971	C7H4N0O4S1	7	4	0	4	1
183.012	20955105	C8H8N0O3S1	8	8	0	3	1
183.03	5886499	C8H8N0O5S0	8	8	0	5	0
183.045	5268539	C12H8N0O2S0	12	8	0	2	0
183.048	6724200	C9H12N0O2S1	9	12	0	2	1
183.056	2810341	C11H8N2O1S0	11	8	2	1	0
183.066	11186857	C9H12N0O4S0	9	12	0	4	0
183.082	23867874	C13H12N0O1S0	13	12	0	1	0
183.085	3219375	C10H16N0O1S1	10	16	0	1	1
183.103	31052080	C10H16N0O3S0	10	16	0	3	0
183.114	2890042	C9H16N2O2S0	9	16	2	2	0
183.139	23719607	C11H20N0O2S0	11	20	0	2	0
184.007	7510429	C7H7N1O3S1	7	7	1	3	1
184.04	3834649	C11H7N1O2S0	11	7	1	2	0
184.044	6885349	C8H11N1O2S1	8	11	1	2	1
184.061	3595336	C8H11N1O4S0	8	11	1	4	0
184.077	9625569	C12H11N1O1S0	12	11	1	1	0
184.098	5246577	C9H15N1O3S0	9	15	1	3	0
184.113	7943594	C13H15N1O0S0	13	15	1	0	0
184.974	5829663	C7H6N0O2S2	7	6	0	2	2
184.991	5609571	C7H6N0O4S1	7	6	0	4	1
185.028	15066733	C8H10N0O3S1	8	10	0	3	1
185.035	2788586	C10H6N2O2S0	10	6	2	2	0
185.061	32227819	C12H10N0O2S0	12	10	0	2	0
185.064	3672087	C9H14N0O2S1	9	14	0	2	1
185.072	4684757	C11H10N2O1S0	11	10	2	1	0
185.082	11802939	C9H14N0O4S0	9	14	0	4	0
185.097	68080245	C13H14N0O1S0	13	14	0	1	0
185.108	4112992	C12H14N2O0S0	12	14	2	0	0
185.118	10477509	C10H18N0O3S0	10	18	0	3	0
186.02	3640763	C10H5N1O3S0	10	5	1	3	0
186.023	5579976	C7H9N1O3S1	7	9	1	3	1
186.056	16936647	C11H9N1O2S0	11	9	1	2	0
186.092	27340882	C12H13N1O1S0	12	13	1	1	0
186.096	2928799	C9H17N1O1S1	9	17	1	1	1
186.129	5371550	C13H17N1O0S0	13	17	1	0	0
186.953	2814307	C6H4N0O3S2	6	4	0	3	2
186.989	6271695	C7H8N0O2S2	7	8	0	2	2
187.007	6304276	C7H8N0O4S1	7	8	0	4	1
187.022	2853519	C11H8N0O1S1	11	8	0	1	1
187.04	15329683	C11H8N0O3S0	11	8	0	3	0
187.043	4721696	C8H12N0O3S1	8	12	0	3	1
187.051	6319039	C10H8N2O2S0	10	8	2	2	0
187.076	75533344	C12H12N0O2S0	12	12	0	2	0
187.088	7898699	C11H12N2O1S0	11	12	2	1	0
187.098	6306162	C9H16N0O4S0	9	16	0	4	0
187.113	69893292	C13H16N0O1S0	13	16	0	1	0
187.124	3318328	C12H16N2O0S0	12	16	2	0	0
188.035	5301275	C10H7N1O3S0	10	7	1	3	0
188.054	4863971	C11H11N1O0S1	11	11	1	0	1
188.072	29061416	C11H11N1O2S0	11	11	1	2	0
188.108	19097781	C12H15N1O1S0	12	15	1	1	0
188.144	4642689	C13H19N1O0S0	13	19	1	0	0
188.969	3052662	C6H6N0O3S2	6	6	0	3	2
189.019	6353914	C10H6N0O4S0	10	6	0	4	0
189.023	5610248	C7H10N0O4S1	7	10	0	4	1
189.038	7846211	C11H10N0O1S1	11	10	0	1	1
189.056	57838087	C11H10N0O3S0	11	10	0	3	0
189.059	14865428	C8H14N0O3S1	8	14	0	3	1
189.067	9518131	C10H10N2O2S0	10	10	2	2	0
189.092	98736788	C12H14N0O2S0	12	14	0	2	0
189.103	4298943	C11H14N2O1S0	11	14	2	1	0
189.128	79505185	C13H18N0O1S0	13	18	0	1	0
190.033	7832644	C10H9N1O1S1	10	9	1	1	1
190.051	20890633	C10H9N1O3S0	10	9	1	3	0
190.07	4006929	C11H13N1O0S1	11	13	1	0	1
190.087	24999317	C11H13N1O2S0	11	13	1	2	0
190.124	11765025	C12H17N1O1S0	12	17	1	1	0
190.16	3622125	C13H21N1O0S0	13	21	1	0	0
191.017	12053638	C10H8N0O2S1	10	8	0	2	1
191.035	18952137	C10H8N0O4S0	10	8	0	4	0
191.038	3587542	C7H12N0O4S1	7	12	0	4	1
191.046	4807924	C9H8N2O3S0	9	8	2	3	0
191.054	7675793	C11H12N0O1S1	11	12	0	1	1
191.071	47892565	C11H12N0O3S0	11	12	0	3	0
191.075	12813153	C8H16N0O3S1	8	16	0	3	1
191.083	7649920	C10H12N2O2S0	10	12	2	2	0
191.108	84316384	C12H16N0O2S0	12	16	0	2	0
191.144	127060331	C13H20N0O1S0	13	20	0	1	0
192.012	8309328	C9H7N1O2S1	9	7	1	2	1
192.03	6525715	C9H7N1O4S0	9	7	1	4	0
192.049	9934554	C10H11N1O1S1	10	11	1	1	1
192.067	21168413	C10H11N1O3S0	10	11	1	3	0
192.082	4895030	C14H11N1O0S0	14	11	1	0	0
192.103	15022758	C11H15N1O2S0	11	15	1	2	0
192.139	4801648	C12H19N1O1S0	12	19	1	1	0
192.996	8588226	C9H6N0O3S1	9	6	0	3	1
193.014	4146949	C9H6N0O5S0	9	6	0	5	0
193.033	13585482	C10H10N0O2S1	10	10	0	2	1
193.051	19281292	C10H10N0O4S0	10	10	0	4	0
193.054	3082073	C7H14N0O4S1	7	14	0	4	1
193.062	6097334	C9H10N2O3S0	9	10	2	3	0
193.066	9170373	C14H10N0O1S0	14	10	0	1	0
193.069	5743954	C11H14N0O1S1	11	14	0	1	1
193.087	48213524	C11H14N0O3S0	11	14	0	3	0
193.098	5217470	C10H14N2O2S0	10	14	2	2	0
193.123	61608603	C12H18N0O2S0	12	18	0	2	0
193.16	72417059	C13H22N0O1S0	13	22	0	1	0
193.992	4573156	C8H5N1O3S1	8	5	1	3	1
194.028	10056874	C9H9N1O2S1	9	9	1	2	1
194.046	9341675	C9H9N1O4S0	9	9	1	4	0
194.061	4985635	C13H9N1O1S0	13	9	1	1	0
194.065	7193263	C10H13N1O1S1	10	13	1	1	1
194.082	13855344	C10H13N1O3S0	10	13	1	3	0
194.098	6123176	C14H13N1O0S0	14	13	1	0	0
194.119	4854645	C11H17N1O2S0	11	17	1	2	0
195.012	13291418	C9H8N0O3S1	9	8	0	3	1
195.03	7189593	C9H8N0O5S0	9	8	0	5	0
195.045	6678416	C13H8N0O2S0	13	8	0	2	0
195.049	13070108	C10H12N0O2S1	10	12	0	2	1
195.066	19820636	C10H12N0O4S0	10	12	0	4	0
195.078	3141636	C9H12N2O3S0	9	12	2	3	0
195.082	23436434	C14H12N0O1S0	14	12	0	1	0
195.085	3266783	C11H16N0O1S1	11	16	0	1	1
195.093	3115627	C13H12N2O0S0	13	12	2	0	0
195.103	62789342	C11H16N0O3S0	11	16	0	3	0
195.139	67630944	C12H20N0O2S0	12	20	0	2	0
195.175	6231010	C13H24N0O1S0	13	24	0	1	0
196.007	5059167	C8H7N1O3S1	8	7	1	3	1
196.044	7791582	C9H11N1O2S1	9	11	1	2	1
196.062	5857052	C9H11N1O4S0	9	11	1	4	0
196.077	12436561	C13H11N1O1S0	13	11	1	1	0
196.098	5814299	C10H15N1O3S0	10	15	1	3	0
196.113	8015312	C14H15N1O0S0	14	15	1	0	0
196.974	3703010	C8H6N0O2S2	8	6	0	2	2
196.991	5814046	C8H6N0O4S1	8	6	0	4	1
197.028	18088729	C9H10N0O3S1	9	10	0	3	1
197.046	5739094	C9H10N0O5S0	9	10	0	5	0
197.061	22899081	C13H10N0O2S0	13	10	0	2	0
197.064	8891797	C10H14N0O2S1	10	14	0	2	1
197.072	3703535	C12H10N2O1S0	12	10	2	1	0
197.082	21630417	C10H14N0O4S0	10	14	0	4	0
197.097	49425925	C14H14N0O1S0	14	14	0	1	0
197.108	3771819	C13H14N2O0S0	13	14	2	0	0
197.118	70581836	C11H18N0O3S0	11	18	0	3	0
197.155	21289159	C12H22N0O2S0	12	22	0	2	0
198.023	6658707	C8H9N1O3S1	8	9	1	3	1
198.056	15893375	C12H9N1O2S0	12	9	1	2	0
198.059	5383946	C9H13N1O2S1	9	13	1	2	1
198.077	2972357	C9H13N1O4S0	9	13	1	4	0
198.092	22370550	C13H13N1O1S0	13	13	1	1	0
198.114	4894908	C10H17N1O3S0	10	17	1	3	0
198.129	9075053	C14H17N1O0S0	14	17	1	0	0
198.989	11068487	C8H8N0O2S2	8	8	0	2	2
199.007	9522815	C8H8N0O4S1	8	8	0	4	1
199.04	9361128	C12H8N0O3S0	12	8	0	3	0
199.043	9801203	C9H12N0O3S1	9	12	0	3	1
199.051	4576780	C11H8N2O2S0	11	8	2	2	0
199.061	3443051	C9H12N0O5S0	9	12	0	5	0
199.076	56279900	C13H12N0O2S0	13	12	0	2	0
199.088	8269439	C12H12N2O1S0	12	12	2	1	0
199.098	21671327	C10H16N0O4S0	10	16	0	4	0
199.113	83517391	C14H16N0O1S0	14	16	0	1	0
199.124	2943666	C13H16N2O0S0	13	16	2	0	0
199.134	11906066	C11H20N0O3S0	11	20	0	3	0
199.17	7157765	C12H24N0O2S0	12	24	0	2	0
200.002	3793257	C7H7N1O4S1	7	7	1	4	1
200.035	7360270	C11H7N1O3S0	11	7	1	3	0
200.039	4970521	C8H11N1O3S1	8	11	1	3	1
200.072	28245886	C12H11N1O2S0	12	11	1	2	0
200.108	25997294	C13H15N1O1S0	13	15	1	1	0
200.144	6498653	C14H19N1O0S0	14	19	1	0	0
200.969	9086998	C7H6N0O3S2	7	6	0	3	2
200.986	3090955	C7H6N0O5S1	7	6	0	5	1
201.005	4229506	C8H10N0O2S2	8	10	0	2	2
201.019	3584333	C11H6N0O4S0	11	6	0	4	0
201.023	10674103	C8H10N0O4S1	8	10	0	4	1
201.038	6242532	C12H10N0O1S1	12	10	0	1	1
201.056	43106073	C12H10N0O3S0	12	10	0	3	0
201.059	5995235	C9H14N0O3S1	9	14	0	3	1
201.067	10750266	C11H10N2O2S0	11	10	2	2	0
201.077	3638488	C9H14N0O5S0	9	14	0	5	0
201.092	102461317	C13H14N0O2S0	13	14	0	2	0
201.103	8562086	C12H14N2O1S0	12	14	2	1	0
201.113	12498628	C10H18N0O4S0	10	18	0	4	0
201.129	82733041	C14H18N0O1S0	14	18	0	1	0
202.018	15650323	C7H9N1O4S1	7	9	1	4	1
202.033	7100223	C11H9N1O1S1	11	9	1	1	1
202.051	24325234	C11H9N1O3S0	11	9	1	3	0
202.07	4806439	C12H13N1O0S1	12	13	1	0	1
202.087	41278170	C12H13N1O2S0	12	13	1	2	0
202.124	20664642	C13H17N1O1S0	13	17	1	1	0
202.16	6567210	C14H21N1O0S0	14	21	1	0	0
203.002	5770861	C7H8N0O5S1	7	8	0	5	1
203.017	6698519	C11H8N0O2S1	11	8	0	2	1
203.035	23275848	C11H8N0O4S0	11	8	0	4	0
203.038	18150738	C8H12N0O4S1	8	12	0	4	1
203.046	6452711	C10H8N2O3S0	10	8	2	3	0
203.054	9437564	C12H12N0O1S1	12	12	0	1	1
203.071	80743853	C12H12N0O3S0	12	12	0	3	0
203.075	7427510	C9H16N0O3S1	9	16	0	3	1
203.083	12343244	C11H12N2O2S0	11	12	2	2	0
203.108	114814482	C13H16N0O2S0	13	16	0	2	0
203.119	4183472	C12H16N2O1S0	12	16	2	1	0
203.144	96503414	C14H20N0O1S0	14	20	0	1	0
203.997	3384260	C6H7N1O5S1	6	7	1	5	1
204.012	7236781	C10H7N1O2S1	10	7	1	2	1
204.03	9431517	C10H7N1O4S0	10	7	1	4	0
204.034	3020134	C7H11N1O4S1	7	11	1	4	1
204.049	10176270	C11H11N1O1S1	11	11	1	1	1
204.067	32834622	C11H11N1O3S0	11	11	1	3	0
204.085	5419504	C12H15N1O0S1	12	15	1	0	1
204.103	35483807	C12H15N1O2S0	12	15	1	2	0
204.139	16126208	C13H19N1O1S0	13	19	1	1	0
204.996	7883718	C10H6N0O3S1	10	6	0	3	1
205	3089358	C7H10N0O3S2	7	10	0	3	2
205.014	5092211	C10H6N0O5S0	10	6	0	5	0
205.018	6893308	C7H10N0O5S1	7	10	0	5	1
205.033	22283811	C11H10N0O2S1	11	10	0	2	1
205.051	44773969	C11H10N0O4S0	11	10	0	4	0
205.054	9269082	C8H14N0O4S1	8	14	0	4	1
205.062	10838126	C10H10N2O3S0	10	10	2	3	0
205.066	3353848	C15H10N0O1S0	15	10	0	1	0
205.069	8311937	C12H14N0O1S1	12	14	0	1	1
205.087	91740847	C12H14N0O3S0	12	14	0	3	0
205.09	4871351	C9H18N0O3S1	9	18	0	3	1
205.098	11567308	C11H14N2O2S0	11	14	2	2	0
205.123	94925580	C13H18N0O2S0	13	18	0	2	0
205.16	124277610	C14H22N0O1S0	14	22	0	1	0
206.028	21957623	C10H9N1O2S1	10	9	1	2	1
206.046	13353508	C10H9N1O4S0	10	9	1	4	0
206.049	9791276	C7H13N1O4S1	7	13	1	4	1
206.065	10791506	C11H13N1O1S1	11	13	1	1	1
206.082	27532414	C11H13N1O3S0	11	13	1	3	0
206.098	7134883	C15H13N1O0S0	15	13	1	0	0
206.119	19693784	C12H17N1O2S0	12	17	1	2	0
206.155	5355825	C13H21N1O1S0	13	21	1	1	0
207.012	24194387	C10H8N0O3S1	10	8	0	3	1
207.03	8638589	C10H8N0O5S0	10	8	0	5	0
207.033	7568517	C7H12N0O5S1	7	12	0	5	1
207.041	3758616	C9H8N2O4S0	9	8	2	4	0
207.049	19743146	C11H12N0O2S1	11	12	0	2	1
207.066	51054036	C11H12N0O4S0	11	12	0	4	0
207.07	4055580	C8H16N0O4S1	8	16	0	4	1
207.077	8364783	C10H12N2O3S0	10	12	2	3	0
207.082	28813816	C15H12N0O1S0	15	12	0	1	0
207.085	5557248	C12H16N0O1S1	12	16	0	1	1
207.103	94357035	C12H16N0O3S0	12	16	0	3	0
207.114	5179717	C11H16N2O2S0	11	16	2	2	0
207.139	116602497	C13H20N0O2S0	13	20	0	2	0
207.175	50933464	C14H24N0O1S0	14	24	0	1	0
208.007	8714350	C9H7N1O3S1	9	7	1	3	1
208.025	4381206	C9H7N1O5S0	9	7	1	5	0
208.044	11883201	C10H11N1O2S1	10	11	1	2	1
208.062	15983850	C10H11N1O4S0	10	11	1	4	0
208.077	21064461	C14H11N1O1S0	14	11	1	1	0
208.08	7717140	C11H15N1O1S1	11	15	1	1	1
208.098	17602877	C11H15N1O3S0	11	15	1	3	0
208.113	12699488	C15H15N1O0S0	15	15	1	0	0
208.134	5502992	C12H19N1O2S0	12	19	1	2	0
208.974	5016814	C9H6N0O2S2	9	6	0	2	2
208.991	7421461	C9H6N0O4S1	9	6	0	4	1
209.028	19511141	C10H10N0O3S1	10	10	0	3	1
209.046	15306124	C10H10N0O5S0	10	10	0	5	0
209.057	4041509	C9H10N2O4S0	9	10	2	4	0
209.061	22212526	C14H10N0O2S0	14	10	0	2	0
209.064	9120181	C11H14N0O2S1	11	14	0	2	1
209.072	5226182	C13H10N2O1S0	13	10	2	1	0
209.082	45630428	C11H14N0O4S0	11	14	0	4	0
209.093	4283637	C10H14N2O3S0	10	14	2	3	0
209.097	51679230	C15H14N0O1S0	15	14	0	1	0
209.101	4407045	C12H18N0O1S1	12	18	0	1	1
209.108	9497366	C14H14N2O0S0	14	14	2	0	0
209.118	159217708	C12H18N0O3S0	12	18	0	3	0
209.13	3199173	C11H18N2O2S0	11	18	2	2	0
209.155	120117372	C13H22N0O2S0	13	22	0	2	0
209.191	5269964	C14H26N0O1S0	14	26	0	1	0
209.987	4683260	C8H5N1O4S1	8	5	1	4	1
210.023	9679049	C9H9N1O3S1	9	9	1	3	1
210.041	3550575	C9H9N1O5S0	9	9	1	5	0
210.056	15570447	C13H9N1O2S0	13	9	1	2	0
210.059	11750422	C10H13N1O2S1	10	13	1	2	1
210.077	9370939	C10H13N1O4S0	10	13	1	4	0
210.092	28149851	C14H13N1O1S0	14	13	1	1	0
210.114	11569800	C11H17N1O3S0	11	17	1	3	0
210.129	11274920	C15H17N1O0S0	15	17	1	0	0
210.15	4145621	C12H21N1O2S0	12	21	1	2	0
210.953	4618064	C8H4N0O3S2	8	4	0	3	2
210.989	7418522	C9H8N0O2S2	9	8	0	2	2
211.007	13124542	C9H8N0O4S1	9	8	0	4	1
211.022	4240093	C13H8N0O1S1	13	8	0	1	1
211.04	12381697	C13H8N0O3S0	13	8	0	3	0
211.043	15168008	C10H12N0O3S1	10	12	0	3	1
211.051	5836056	C12H8N2O2S0	12	8	2	2	0
211.061	10605612	C10H12N0O5S0	10	12	0	5	0
211.076	60960843	C14H12N0O2S0	14	12	0	2	0
211.08	5989073	C11H16N0O2S1	11	16	0	2	1
211.088	9610593	C13H12N2O1S0	13	12	2	1	0
211.098	77363317	C11H16N0O4S0	11	16	0	4	0
211.113	90380436	C15H16N0O1S0	15	16	0	1	0
211.124	3999531	C14H16N2O0S0	14	16	2	0	0
211.134	133675199	C12H20N0O3S0	12	20	0	3	0
211.17	23409416	C13H24N0O2S0	13	24	0	2	0
212.035	7798964	C12H7N1O3S0	12	7	1	3	0
212.039	7319483	C9H11N1O3S1	9	11	1	3	1
212.054	5728728	C13H11N1O0S1	13	11	1	0	1
212.072	41672699	C13H11N1O2S0	13	11	1	2	0
212.075	4479745	C10H15N1O2S1	10	15	1	2	1
212.108	44212289	C14H15N1O1S0	14	15	1	1	0
212.129	3308138	C11H19N1O3S0	11	19	1	3	0
212.144	10260359	C15H19N1O0S0	15	19	1	0	0
213.005	10907875	C9H10N0O2S2	9	10	0	2	2
213.019	5134845	C12H6N0O4S0	12	6	0	4	0
213.023	16816388	C9H10N0O4S1	9	10	0	4	1
213.031	3690258	C11H6N2O3S0	11	6	2	3	0
213.038	6757152	C13H10N0O1S1	13	10	0	1	1
213.056	42827585	C13H10N0O3S0	13	10	0	3	0
213.059	9874247	C10H14N0O3S1	10	14	0	3	1
213.067	12514645	C12H10N2O2S0	12	10	2	2	0
213.077	10041192	C10H14N0O5S0	10	14	0	5	0
213.092	87598980	C14H14N0O2S0	14	14	0	2	0
213.095	3749642	C11H18N0O2S1	11	18	0	2	1
213.103	12664729	C13H14N2O1S0	13	14	2	1	0
213.113	69758891	C11H18N0O4S0	11	18	0	4	0
213.128	112617415	C15H18N0O1S0	15	18	0	1	0
213.14	3895388	C14H18N2O0S0	14	18	2	0	0
213.15	15514606	C12H22N0O3S0	12	22	0	3	0
213.186	4416817	C13H26N0O2S0	13	26	0	2	0
214.018	4231438	C8H9N1O4S1	8	9	1	4	1
214.033	9412649	C12H9N1O1S1	12	9	1	1	1
214.051	21248585	C12H9N1O3S0	12	9	1	3	0
214.054	7152207	C9H13N1O3S1	9	13	1	3	1
214.07	3490793	C13H13N1O0S1	13	13	1	0	1
214.087	68021897	C13H13N1O2S0	13	13	1	2	0
214.124	35760841	C14H17N1O1S0	14	17	1	1	0
214.16	8958473	C15H21N1O0S0	15	21	1	0	0
214.984	19378325	C8H8N0O3S2	8	8	0	3	2
215.002	23122099	C8H8N0O5S1	8	8	0	5	1
215.017	8717773	C12H8N0O2S1	12	8	0	2	1
215.035	20006635	C12H8N0O4S0	12	8	0	4	0
215.038	57046257	C9H12N0O4S1	9	12	0	4	1
215.046	7455486	C11H8N2O3S0	11	8	2	3	0
215.054	11107082	C13H12N0O1S1	13	12	0	1	1
215.071	91444520	C13H12N0O3S0	13	12	0	3	0
215.075	3529390	C10H16N0O3S1	10	16	0	3	1
215.083	17744187	C12H12N2O2S0	12	12	2	2	0
215.092	5643596	C10H16N0O5S0	10	16	0	5	0
215.108	145192293	C14H16N0O2S0	14	16	0	2	0
215.119	9028984	C13H16N2O1S0	13	16	2	1	0
215.129	18122633	C11H20N0O4S0	11	20	0	4	0
215.144	89822627	C15H20N0O1S0	15	20	0	1	0
215.155	4488117	C14H20N2O0S0	14	20	2	0	0
216.012	7307828	C11H7N1O2S1	11	7	1	2	1
216.03	7493968	C11H7N1O4S0	11	7	1	4	0
216.034	20593494	C8H11N1O4S1	8	11	1	4	1
216.049	12566894	C12H11N1O1S1	12	11	1	1	1
216.067	54102923	C12H11N1O3S0	12	11	1	3	0
216.085	5142952	C13H15N1O0S1	13	15	1	0	1
216.103	56953797	C13H15N1O2S0	13	15	1	2	0
216.139	24107007	C14H19N1O1S0	14	19	1	1	0
216.176	8901689	C15H23N1O0S0	15	23	1	0	0
216.997	4263994	C11H6N0O3S1	11	6	0	3	1
217	4707007	C8H10N0O3S2	8	10	0	3	2
217.018	6794330	C8H10N0O5S1	8	10	0	5	1
217.026	3922406	C10H6N2O4S0	10	6	2	4	0
217.033	17646449	C12H10N0O2S1	12	10	0	2	1
217.051	56539532	C12H10N0O4S0	12	10	0	4	0
217.054	19659153	C9H14N0O4S1	9	14	0	4	1
217.062	13739933	C11H10N2O3S0	11	10	2	3	0
217.066	6756003	C16H10N0O1S0	16	10	0	1	0
217.069	12227497	C13H14N0O1S1	13	14	0	1	1
217.087	126288324	C13H14N0O3S0	13	14	0	3	0
217.09	7166665	C10H18N0O3S1	10	18	0	3	1
217.098	20933077	C12H14N2O2S0	12	14	2	2	0
217.123	164442619	C14H18N0O2S0	14	18	0	2	0
217.135	5089548	C13H18N2O1S0	13	18	2	1	0
217.16	117031474	C15H22N0O1S0	15	22	0	1	0
218.013	7752738	C7H9N1O5S1	7	9	1	5	1
218.028	18620216	C11H9N1O2S1	11	9	1	2	1
218.046	21208914	C11H9N1O4S0	11	9	1	4	0
218.065	13916012	C12H13N1O1S1	12	13	1	1	1
218.082	43896710	C12H13N1O3S0	12	13	1	3	0
218.098	4325148	C16H13N1O0S0	16	13	1	0	0
218.101	3211425	C13H17N1O0S1	13	17	1	0	1
218.119	41285562	C13H17N1O2S0	13	17	1	2	0
218.155	15132655	C14H21N1O1S0	14	21	1	1	0
218.979	5182197	C7H8N0O4S2	7	8	0	4	2
219.012	17632418	C11H8N0O3S1	11	8	0	3	1
219.03	19552443	C11H8N0O5S0	11	8	0	5	0
219.033	7853247	C8H12N0O5S1	8	12	0	5	1
219.041	5441994	C10H8N2O4S0	10	8	2	4	0
219.049	23190740	C12H12N0O2S1	12	12	0	2	1
219.066	66395372	C12H12N0O4S0	12	12	0	4	0
219.07	16994545	C9H16N0O4S1	9	16	0	4	1
219.078	16274172	C11H12N2O3S0	11	12	2	3	0
219.082	12323585	C16H12N0O1S0	16	12	0	1	0
219.085	6900230	C13H16N0O1S1	13	16	0	1	1
219.103	131894558	C13H16N0O3S0	13	16	0	3	0
219.114	9891629	C12H16N2O2S0	12	16	2	2	0
219.139	128277840	C14H20N0O2S0	14	20	0	2	0
219.15	3473119	C13H20N2O1S0	13	20	2	1	0
219.175	127208833	C15H24N0O1S0	15	24	0	1	0
220.007	8169681	C10H7N1O3S1	10	7	1	3	1
220.025	3475048	C10H7N1O5S0	10	7	1	5	0
220.044	21484032	C11H11N1O2S1	11	11	1	2	1
220.062	21380631	C11H11N1O4S0	11	11	1	4	0
220.077	11648043	C15H11N1O1S0	15	11	1	1	0
220.08	8121136	C12H15N1O1S1	12	15	1	1	1
220.098	33927750	C12H15N1O3S0	12	15	1	3	0
220.113	16366682	C16H15N1O0S0	16	15	1	0	0
220.117	4151390	C13H19N1O0S1	13	19	1	0	1
220.134	20390517	C13H19N1O2S0	13	19	1	2	0
220.171	6571172	C14H23N1O1S0	14	23	1	1	0
220.974	3988115	C10H6N0O2S2	10	6	0	2	2
220.991	6508457	C10H6N0O4S1	10	6	0	4	1
220.995	4487085	C7H10N0O4S2	7	10	0	4	2
221.013	4945603	C7H10N0O6S1	7	10	0	6	1
221.028	31601365	C11H10N0O3S1	11	10	0	3	1
221.031	3629401	C8H14N0O3S2	8	14	0	3	2
221.046	19131115	C11H10N0O5S0	11	10	0	5	0
221.049	8397039	C8H14N0O5S1	8	14	0	5	1
221.057	3744568	C10H10N2O4S0	10	10	2	4	0
221.061	13126909	C15H10N0O2S0	15	10	0	2	0
221.064	13977346	C12H14N0O2S1	12	14	0	2	1
221.072	4015883	C14H10N2O1S0	14	10	2	1	0
221.082	59971351	C12H14N0O4S0	12	14	0	4	0
221.085	11798299	C9H18N0O4S1	9	18	0	4	1
221.093	6849445	C11H14N2O3S0	11	14	2	3	0
221.097	43876138	C16H14N0O1S0	16	14	0	1	0
221.101	6046766	C13H18N0O1S1	13	18	0	1	1
221.108	7701559	C15H14N2O0S0	15	14	2	0	0
221.118	149899075	C13H18N0O3S0	13	18	0	3	0
221.13	4527953	C12H18N2O2S0	12	18	2	2	0
221.155	183109487	C14H22N0O2S0	14	22	0	2	0
221.191	29472667	C15H26N0O1S0	15	26	0	1	0
221.987	4224070	C9H5N1O4S1	9	5	1	4	1
222.023	20712304	C10H9N1O3S1	10	9	1	3	1
222.041	4714884	C10H9N1O5S0	10	9	1	5	0
222.056	7682966	C14H9N1O2S0	14	9	1	2	0
222.059	15756185	C11H13N1O2S1	11	13	1	2	1
222.077	18963374	C11H13N1O4S0	11	13	1	4	0
222.081	4944178	C8H17N1O4S1	8	17	1	4	1
222.092	35371967	C15H13N1O1S0	15	13	1	1	0
222.096	5948611	C12H17N1O1S1	12	17	1	1	1
222.114	19728343	C12H17N1O3S0	12	17	1	3	0
222.129	16164329	C16H17N1O0S0	16	17	1	0	0
222.15	4284161	C13H21N1O2S0	13	21	1	2	0
222.953	3324796	C9H4N0O3S2	9	4	0	3	2
222.989	10372004	C10H8N0O2S2	10	8	0	2	2
223.007	12322231	C10H8N0O4S1	10	8	0	4	1
223.01	6480315	C7H12N0O4S2	7	12	0	4	2
223.025	3862858	C10H8N0O6S0	10	8	0	6	0
223.04	7433435	C14H8N0O3S0	14	8	0	3	0
223.043	20507614	C11H12N0O3S1	11	12	0	3	1
223.051	3786471	C13H8N2O2S0	13	8	2	2	0
223.061	20869105	C11H12N0O5S0	11	12	0	5	0
223.065	3692661	C8H16N0O5S1	8	16	0	5	1
223.076	47736834	C15H12N0O2S0	15	12	0	2	0
223.08	8891397	C12H16N0O2S1	12	16	0	2	1
223.088	8262158	C14H12N2O1S0	14	12	2	1	0
223.098	79872024	C12H16N0O4S0	12	16	0	4	0
223.109	4142372	C11H16N2O3S0	11	16	2	3	0
223.113	65585193	C16H16N0O1S0	16	16	0	1	0
223.124	11110453	C15H16N2O0S0	15	16	2	0	0
223.134	269324351	C13H20N0O3S0	13	20	0	3	0
223.17	163229798	C14H24N0O2S0	14	24	0	2	0
223.207	3617933	C15H28N0O1S0	15	28	0	1	0
224.002	6095813	C9H7N1O4S1	9	7	1	4	1
224.039	14228970	C10H11N1O3S1	10	11	1	3	1
224.056	6688508	C10H11N1O5S0	10	11	1	5	0
224.072	32844811	C14H11N1O2S0	14	11	1	2	0
224.075	7174158	C11H15N1O2S1	11	15	1	2	1
224.093	11040800	C11H15N1O4S0	11	15	1	4	0
224.108	36045872	C15H15N1O1S0	15	15	1	1	0
224.129	8748101	C12H19N1O3S0	12	19	1	3	0
224.145	12918356	C16H19N1O0S0	16	19	1	0	0
224.969	9397108	C9H6N0O3S2	9	6	0	3	2
225.005	6688150	C10H10N0O2S2	10	10	0	2	2
225.023	19957671	C10H10N0O4S1	10	10	0	4	1
225.026	4075050	C7H14N0O4S2	7	14	0	4	2
225.04	5438391	C10H10N0O6S0	10	10	0	6	0
225.056	34176966	C14H10N0O3S0	14	10	0	3	0
225.059	16165833	C11H14N0O3S1	11	14	0	3	1
225.067	17484752	C13H10N2O2S0	13	10	2	2	0
225.077	21489625	C11H14N0O5S0	11	14	0	5	0
225.092	80398312	C15H14N0O2S0	15	14	0	2	0
225.095	4814059	C12H18N0O2S1	12	18	0	2	1
225.103	12599282	C14H14N2O1S0	14	14	2	1	0
225.113	165836795	C12H18N0O4S0	12	18	0	4	0
225.128	110934026	C16H18N0O1S0	16	18	0	1	0
225.14	3421460	C15H18N2O0S0	15	18	2	0	0
225.15	134608925	C13H22N0O3S0	13	22	0	3	0
225.186	18188351	C14H26N0O2S0	14	26	0	2	0
226.018	6506028	C9H9N1O4S1	9	9	1	4	1
226.033	5154361	C13H9N1O1S1	13	9	1	1	1
226.051	25557832	C13H9N1O3S0	13	9	1	3	0
226.054	8883019	C10H13N1O3S1	10	13	1	3	1
226.072	4140379	C10H13N1O5S0	10	13	1	5	0
226.087	59034472	C14H13N1O2S0	14	13	1	2	0
226.108	3587450	C11H17N1O4S0	11	17	1	4	0
226.124	45333383	C15H17N1O1S0	15	17	1	1	0
226.145	3834778	C12H21N1O3S0	12	21	1	3	0
226.16	9676711	C16H21N1O0S0	16	21	1	0	0
226.984	5334104	C9H8N0O3S2	9	8	0	3	2
227.002	7818342	C9H8N0O5S1	9	8	0	5	1
227.017	6109042	C13H8N0O2S1	13	8	0	2	1
227.035	18991745	C13H8N0O4S0	13	8	0	4	0
227.038	24515203	C10H12N0O4S1	10	12	0	4	1
227.046	8160394	C12H8N2O3S0	12	8	2	3	0
227.054	9353872	C14H12N0O1S1	14	12	0	1	1
227.056	3329554	C10H12N0O6S0	10	12	0	6	0
227.071	91668126	C14H12N0O3S0	14	12	0	3	0
227.075	38997665	C11H16N0O3S1	11	16	0	3	1
227.083	21550759	C13H12N2O2S0	13	12	2	2	0
227.093	25013935	C11H16N0O5S0	11	16	0	5	0
227.108	139353787	C15H16N0O2S0	15	16	0	2	0
227.119	17850052	C14H16N2O1S0	14	16	2	1	0
227.129	135724748	C12H20N0O4S0	12	20	0	4	0
227.144	110087896	C16H20N0O1S0	16	20	0	1	0
227.155	5259233	C15H20N2O0S0	15	20	2	0	0
227.165	8737513	C13H24N0O3S0	13	24	0	3	0
227.202	32788230	C14H28N0O2S0	14	28	0	2	0
228.012	6817142	C12H7N1O2S1	12	7	1	2	1
228.03	9066883	C12H7N1O4S0	12	7	1	4	0
228.034	7792006	C9H11N1O4S1	9	11	1	4	1
228.049	12798865	C13H11N1O1S1	13	11	1	1	1
228.067	49164702	C13H11N1O3S0	13	11	1	3	0
228.07	6914721	C10H15N1O3S1	10	15	1	3	1
228.103	82194873	C14H15N1O2S0	14	15	1	2	0
228.139	31046100	C15H19N1O1S0	15	19	1	1	0
228.176	10277359	C16H23N1O0S0	16	23	1	0	0
229	5620537	C9H10N0O3S2	9	10	0	3	2
229.014	6222659	C12H6N0O5S0	12	6	0	5	0
229.018	15071301	C9H10N0O5S1	9	10	0	5	1
229.033	16195664	C13H10N0O2S1	13	10	0	2	1
229.051	47391836	C13H10N0O4S0	13	10	0	4	0
229.054	89486430	C10H14N0O4S1	10	14	0	4	1
229.062	13989476	C12H10N2O3S0	12	10	2	3	0
229.069	9923689	C14H14N0O1S1	14	14	0	1	1
229.072	4145515	C10H14N0O6S0	10	14	0	6	0
229.087	140215413	C14H14N0O3S0	14	14	0	3	0
229.098	24316029	C13H14N2O2S0	13	14	2	2	0
229.108	14018179	C11H18N0O5S0	11	18	0	5	0
229.123	239346830	C15H18N0O2S0	15	18	0	2	0
229.135	8834197	C14H18N2O1S0	14	18	2	1	0
229.145	15818908	C12H22N0O4S0	12	22	0	4	0
229.16	102016167	C16H22N0O1S0	16	22	0	1	0
229.171	4331694	C15H22N2O0S0	15	22	2	0	0
230.028	19529440	C12H9N1O2S1	12	9	1	2	1
230.046	23689963	C12H9N1O4S0	12	9	1	4	0
230.049	24980205	C9H13N1O4S1	9	13	1	4	1
230.065	19189495	C13H13N1O1S1	13	13	1	1	1
230.082	71505666	C13H13N1O3S0	13	13	1	3	0
230.098	6318859	C17H13N1O0S0	17	13	1	0	0
230.119	60045081	C14H17N1O2S0	14	17	1	2	0
230.155	22534959	C15H21N1O1S0	15	21	1	1	0
230.191	11055430	C16H25N1O0S0	16	25	1	0	0
231.012	14328117	C12H8N0O3S1	12	8	0	3	1
231.016	3867831	C9H12N0O3S2	9	12	0	3	2
231.03	17230144	C12H8N0O5S0	12	8	0	5	0
231.033	11485506	C9H12N0O5S1	9	12	0	5	1
231.041	5235526	C11H8N2O4S0	11	8	2	4	0
231.049	28587339	C13H12N0O2S1	13	12	0	2	1
231.066	103954773	C13H12N0O4S0	13	12	0	4	0
231.07	23200087	C10H16N0O4S1	10	16	0	4	1
231.078	19397979	C12H12N2O3S0	12	12	2	3	0
231.082	16572766	C17H12N0O1S0	17	12	0	1	0
231.085	13461856	C14H16N0O1S1	14	16	0	1	1
231.103	170199402	C14H16N0O3S0	14	16	0	3	0
231.106	7825260	C11H20N0O3S1	11	20	0	3	1
231.114	21415280	C13H16N2O2S0	13	16	2	2	0
231.139	203942271	C15H20N0O2S0	15	20	0	2	0
231.15	4411013	C14H20N2O1S0	14	20	2	1	0
231.175	109140372	C16H24N0O1S0	16	24	0	1	0
232.007	11435363	C11H7N1O3S1	11	7	1	3	1
232.025	6696556	C11H7N1O5S0	11	7	1	5	0
232.029	8384878	C8H11N1O5S1	8	11	1	5	1
232.044	32719734	C12H11N1O2S1	12	11	1	2	1
232.062	40067968	C12H11N1O4S0	12	11	1	4	0
232.065	3852674	C9H15N1O4S1	9	15	1	4	1
232.077	12052872	C16H11N1O1S0	16	11	1	1	0
232.08	15825802	C13H15N1O1S1	13	15	1	1	1
232.098	53832595	C13H15N1O3S0	13	15	1	3	0
232.101	5177237	C10H19N1O3S1	10	19	1	3	1
232.113	9923483	C17H15N1O0S0	17	15	1	0	0
232.117	5115805	C14H19N1O0S1	14	19	1	0	1
232.134	42822567	C14H19N1O2S0	14	19	1	2	0
232.171	14478266	C15H23N1O1S0	15	23	1	1	0
232.958	4739663	C7H6N0O5S2	7	6	0	5	2
232.991	8839519	C11H6N0O4S1	11	6	0	4	1
232.995	3744609	C8H10N0O4S2	8	10	0	4	2
233.028	37610865	C12H10N0O3S1	12	10	0	3	1
233.046	46798202	C12H10N0O5S0	12	10	0	5	0
233.049	19058044	C9H14N0O5S1	9	14	0	5	1
233.057	10047360	C11H10N2O4S0	11	10	2	4	0
233.061	11441537	C16H10N0O2S0	16	10	0	2	0
233.064	28118403	C13H14N0O2S1	13	14	0	2	1
233.072	6550407	C15H10N2O1S0	15	10	2	1	0
233.082	143748492	C13H14N0O4S0	13	14	0	4	0
233.085	16217486	C10H18N0O4S1	10	18	0	4	1
233.093	17105297	C12H14N2O3S0	12	14	2	3	0
233.097	40457619	C17H14N0O1S0	17	14	0	1	0
233.118	207121822	C14H18N0O3S0	14	18	0	3	0
233.122	5076639	C11H22N0O3S1	11	22	0	3	1
233.13	10818467	C13H18N2O2S0	13	18	2	2	0
233.155	222784944	C15H22N0O2S0	15	22	0	2	0
233.191	76119489	C16H26N0O1S0	16	26	0	1	0
234.023	16412491	C11H9N1O3S1	11	9	1	3	1
234.041	7778643	C11H9N1O5S0	11	9	1	5	0
234.044	6084180	C8H13N1O5S1	8	13	1	5	1
234.056	7176538	C15H9N1O2S0	15	9	1	2	0
234.059	24282971	C12H13N1O2S1	12	13	1	2	1
234.077	34404195	C12H13N1O4S0	12	13	1	4	0
234.081	4476773	C9H17N1O4S1	9	17	1	4	1
234.092	25527146	C16H13N1O1S0	16	13	1	1	0
234.096	7088492	C13H17N1O1S1	13	17	1	1	1
234.114	34117492	C13H17N1O3S0	13	17	1	3	0
234.129	21228411	C17H17N1O0S0	17	17	1	0	0
234.15	17323908	C14H21N1O2S0	14	21	1	2	0
234.186	5810837	C15H25N1O1S0	15	25	1	1	0
234.989	7864565	C11H8N0O2S2	11	8	0	2	2
235.007	18181372	C11H8N0O4S1	11	8	0	4	1
235.01	3608574	C8H12N0O4S2	8	12	0	4	2
235.025	7087876	C11H8N0O6S0	11	8	0	6	0
235.028	7711237	C8H12N0O6S1	8	12	0	6	1
235.036	3833480	C10H8N2O5S0	10	8	2	5	0
235.04	6671626	C15H8N0O3S0	15	8	0	3	0
235.043	38279436	C12H12N0O3S1	12	12	0	3	1
235.047	3963661	C9H16N0O3S2	9	16	0	3	2
235.051	3527439	C14H8N2O2S0	14	8	2	2	0
235.061	55419155	C12H12N0O5S0	12	12	0	5	0
235.065	16785684	C9H16N0O5S1	9	16	0	5	1
235.072	10018072	C11H12N2O4S0	11	12	2	4	0
235.076	37114137	C16H12N0O2S0	16	12	0	2	0
235.08	16350491	C13H16N0O2S1	13	16	0	2	1
235.088	11436318	C15H12N2O1S0	15	12	2	1	0
235.098	93479202	C13H16N0O4S0	13	16	0	4	0
235.101	11061028	C10H20N0O4S1	10	20	0	4	1
235.109	6866727	C12H16N2O3S0	12	16	2	3	0
235.113	67301673	C17H16N0O1S0	17	16	0	1	0
235.124	10676014	C16H16N2O0S0	16	16	2	0	0
235.134	276001074	C14H20N0O3S0	14	20	0	3	0
235.145	4377974	C13H20N2O2S0	13	20	2	2	0
235.17	287191361	C15H24N0O2S0	15	24	0	2	0
235.207	16506192	C16H28N0O1S0	16	28	0	1	0
236.002	7513747	C10H7N1O4S1	10	7	1	4	1
236.035	3689120	C14H7N1O3S0	14	7	1	3	0
236.039	31163042	C11H11N1O3S1	11	11	1	3	1
236.056	12267177	C11H11N1O5S0	11	11	1	5	0
236.072	23287471	C15H11N1O2S0	15	11	1	2	0
236.075	14674608	C12H15N1O2S1	12	15	1	2	1
236.093	23688887	C12H15N1O4S0	12	15	1	4	0
236.096	11417272	C9H19N1O4S1	9	19	1	4	1
236.108	44395197	C16H15N1O1S0	16	15	1	1	0
236.112	4484030	C13H19N1O1S1	13	19	1	1	1
236.129	19752645	C13H19N1O3S0	13	19	1	3	0
236.144	31734475	C17H19N1O0S0	17	19	1	0	0
236.166	4818131	C14H23N1O2S0	14	23	1	2	0
236.969	6324996	C10H6N0O3S2	10	6	0	3	2
236.986	4157963	C10H6N0O5S1	10	6	0	5	1
237.005	12530706	C11H10N0O2S2	11	10	0	2	2
237.023	21018648	C11H10N0O4S1	11	10	0	4	1
237.026	6581785	C8H14N0O4S2	8	14	0	4	2
237.038	3874590	C15H10N0O1S1	15	10	0	1	1
237.04	9264671	C11H10N0O6S0	11	10	0	6	0
237.044	3940128	C8H14N0O6S1	8	14	0	6	1
237.052	4206371	C10H10N2O5S0	10	10	2	5	0
237.056	24230948	C15H10N0O3S0	15	10	0	3	0
237.059	25951269	C12H14N0O3S1	12	14	0	3	1
237.062	20882471	C9H18N0O3S2	9	18	0	3	2
237.067	10670632	C14H10N2O2S0	14	10	2	2	0
237.077	40735788	C12H14N0O5S0	12	14	0	5	0
237.08	10347053	C9H18N0O5S1	9	18	0	5	1
237.088	7223856	C11H14N2O4S0	11	14	2	4	0
237.092	84231218	C16H14N0O2S0	16	14	0	2	0
237.095	8954419	C13H18N0O2S1	13	18	0	2	1
237.103	17785910	C15H14N2O1S0	15	14	2	1	0
237.113	143471673	C13H18N0O4S0	13	18	0	4	0
237.125	4026941	C12H18N2O3S0	12	18	2	3	0
237.128	85070911	C17H18N0O1S0	17	18	0	1	0
237.14	10455107	C16H18N2O0S0	16	18	2	0	0
237.15	349336647	C14H22N0O3S0	14	22	0	3	0
237.186	174519380	C15H26N0O2S0	15	26	0	2	0
238.018	11905404	C10H9N1O4S1	10	9	1	4	1
238.051	20924807	C14H9N1O3S0	14	9	1	3	0
238.054	17912200	C11H13N1O3S1	11	13	1	3	1
238.072	8634766	C11H13N1O5S0	11	13	1	5	0
238.087	62924180	C15H13N1O2S0	15	13	1	2	0
238.091	6358421	C12H17N1O2S1	12	17	1	2	1
238.109	14636443	C12H17N1O4S0	12	17	1	4	0
238.124	52716960	C16H17N1O1S0	16	17	1	1	0
238.127	3561377	C13H21N1O1S1	13	21	1	1	1
238.145	12983720	C13H21N1O3S0	13	21	1	3	0
238.16	13300141	C17H21N1O0S0	17	21	1	0	0
238.984	15021762	C10H8N0O3S2	10	8	0	3	2
239.002	7731912	C10H8N0O5S1	10	8	0	5	1
239.005	3325129	C7H12N0O5S2	7	12	0	5	2
239.021	8033998	C11H12N0O2S2	11	12	0	2	2
239.035	10243795	C14H8N0O4S0	14	8	0	4	0
239.038	33040084	C11H12N0O4S1	11	12	0	4	1
239.042	9298645	C8H16N0O4S2	8	16	0	4	2
239.046	5280727	C13H8N2O3S0	13	8	2	3	0
239.054	6162137	C15H12N0O1S1	15	12	0	1	1
239.056	9541850	C11H12N0O6S0	11	12	0	6	0
239.071	82573023	C15H12N0O3S0	15	12	0	3	0
239.075	20242144	C12H16N0O3S1	12	16	0	3	1
239.083	35684067	C14H12N2O2S0	14	12	2	2	0
239.093	35981030	C12H16N0O5S0	12	16	0	5	0
239.104	3783786	C11H16N2O4S0	11	16	2	4	0
239.108	119920363	C16H16N0O2S0	16	16	0	2	0
239.119	15860463	C15H16N2O1S0	15	16	2	1	0
239.129	375240434	C13H20N0O4S0	13	20	0	4	0
239.144	117659383	C17H20N0O1S0	17	20	0	1	0
239.155	4099835	C16H20N2O0S0	16	20	2	0	0
239.165	205420286	C14H24N0O3S0	14	24	0	3	0
239.202	15847178	C15H28N0O2S0	15	28	0	2	0
239.997	3545097	C9H7N1O5S1	9	7	1	5	1
240.012	3578510	C13H7N1O2S1	13	7	1	2	1
240.03	5606932	C13H7N1O4S0	13	7	1	4	0
240.034	12636181	C10H11N1O4S1	10	11	1	4	1
240.049	10635289	C14H11N1O1S1	14	11	1	1	1
240.067	54994975	C14H11N1O3S0	14	11	1	3	0
240.07	14927904	C11H15N1O3S1	11	15	1	3	1
240.088	6312998	C11H15N1O5S0	11	15	1	5	0
240.103	79861802	C15H15N1O2S0	15	15	1	2	0
240.124	4532785	C12H19N1O4S0	12	19	1	4	0
240.139	54868022	C16H19N1O1S0	16	19	1	1	0
240.176	13111361	C17H23N1O0S0	17	23	1	0	0
240.963	3973942	C9H6N0O4S2	9	6	0	4	2
241	7395137	C10H10N0O3S2	10	10	0	3	2
241.014	3933381	C13H6N0O5S0	13	6	0	5	0
241.018	16392518	C10H10N0O5S1	10	10	0	5	1
241.021	4989767	C7H14N0O5S2	7	14	0	5	2
241.033	12568907	C14H10N0O2S1	14	10	0	2	1
241.036	3908172	C11H14N0O2S2	11	14	0	2	2
241.051	50899280	C14H10N0O4S0	14	10	0	4	0
241.054	31185233	C11H14N0O4S1	11	14	0	4	1
241.062	20205908	C13H10N2O3S0	13	10	2	3	0
241.069	11397462	C15H14N0O1S1	15	14	0	1	1
241.072	8624983	C11H14N0O6S0	11	14	0	6	0
241.087	130922844	C15H14N0O3S0	15	14	0	3	0
241.09	14264669	C12H18N0O3S1	12	18	0	3	1
241.098	31603039	C14H14N2O2S0	14	14	2	2	0
241.108	36378978	C12H18N0O5S0	12	18	0	5	0
241.123	181254503	C16H18N0O2S0	16	18	0	2	0
241.135	17418602	C15H18N2O1S0	15	18	2	1	0
241.145	160782701	C13H22N0O4S0	13	22	0	4	0
241.16	102455666	C17H22N0O1S0	17	22	0	1	0
241.171	6886773	C16H22N2O0S0	16	22	2	0	0
241.181	12127096	C14H26N0O3S0	14	26	0	3	0
241.217	41908611	C15H30N0O2S0	15	30	0	2	0
242.013	3810932	C9H9N1O5S1	9	9	1	5	1
242.028	17065593	C13H9N1O2S1	13	9	1	2	1
242.046	26149502	C13H9N1O4S0	13	9	1	4	0
242.049	10703999	C10H13N1O4S1	10	13	1	4	1
242.065	18982532	C14H13N1O1S1	14	13	1	1	1
242.082	80599689	C14H13N1O3S0	14	13	1	3	0
242.086	6911626	C11H17N1O3S1	11	17	1	3	1
242.119	78527124	C15H17N1O2S0	15	17	1	2	0
242.155	35555999	C16H21N1O1S0	16	21	1	1	0
242.176	3531045	C13H25N1O3S0	13	25	1	3	0
242.191	11464874	C17H25N1O0S0	17	25	1	0	0
242.979	3931030	C9H8N0O4S2	9	8	0	4	2
243.012	11731872	C13H8N0O3S1	13	8	0	3	1
243.015	4819361	C10H12N0O3S2	10	12	0	3	2
243.03	17255333	C13H8N0O5S0	13	8	0	5	0
243.033	37067686	C10H12N0O5S1	10	12	0	5	1
243.041	7254440	C12H8N2O4S0	12	8	2	4	0
243.049	23126955	C14H12N0O2S1	14	12	0	2	1
243.066	92416944	C14H12N0O4S0	14	12	0	4	0
243.07	33919921	C11H16N0O4S1	11	16	0	4	1
243.078	28976051	C13H12N2O3S0	13	12	2	3	0
243.082	7818165	C18H12N0O1S0	18	12	0	1	0
243.087	8903606	C11H16N0O6S0	11	16	0	6	0
243.103	198474683	C15H16N0O3S0	15	16	0	3	0
243.106	6743228	C12H20N0O3S1	12	20	0	3	1
243.114	27247550	C14H16N2O2S0	14	16	2	2	0
243.124	21778369	C12H20N0O5S0	12	20	0	5	0
243.139	397196230	C16H20N0O2S0	16	20	0	2	0
243.15	7844297	C15H20N2O1S0	15	20	2	1	0
243.16	16189388	C13H24N0O4S0	13	24	0	4	0
243.175	96484305	C17H24N0O1S0	17	24	0	1	0
243.197	4265687	C14H28N0O3S0	14	28	0	3	0
244.007	9649355	C12H7N1O3S1	12	7	1	3	1
244.025	7388368	C12H7N1O5S0	12	7	1	5	0
244.029	6357201	C9H11N1O5S1	9	11	1	5	1
244.044	32060630	C13H11N1O2S1	13	11	1	2	1
244.062	47934683	C13H11N1O4S0	13	11	1	4	0
244.065	20205788	C10H15N1O4S1	10	15	1	4	1
244.077	4900576	C17H11N1O1S0	17	11	1	1	0
244.08	20047073	C14H15N1O1S1	14	15	1	1	1
244.098	105290982	C14H15N1O3S0	14	15	1	3	0
244.113	12205291	C18H15N1O0S0	18	15	1	0	0
244.117	4527852	C15H19N1O0S1	15	19	1	0	1
244.134	57162993	C15H19N1O2S0	15	19	1	2	0
244.171	21992700	C16H23N1O1S0	16	23	1	1	0
244.207	8108295	C17H27N1O0S0	17	27	1	0	0
244.958	3552237	C8H6N0O5S2	8	6	0	5	2
244.991	6234615	C12H6N0O4S1	12	6	0	4	1
244.995	5278200	C9H10N0O4S2	9	10	0	4	2
245.009	4037116	C12H6N0O6S0	12	6	0	6	0
245.012	4976637	C9H10N0O6S1	9	10	0	6	1
245.028	32218626	C13H10N0O3S1	13	10	0	3	1
245.031	3800579	C10H14N0O3S2	10	14	0	3	2
245.046	48344583	C13H10N0O5S0	13	10	0	5	0
245.049	17279497	C10H14N0O5S1	10	14	0	5	1
245.057	17434123	C12H10N2O4S0	12	10	2	4	0
245.061	5281292	C17H10N0O2S0	17	10	0	2	0
245.064	30170637	C14H14N0O2S1	14	14	0	2	1
245.082	155622931	C14H14N0O4S0	14	14	0	4	0
245.085	36496916	C11H18N0O4S1	11	18	0	4	1
245.093	25318934	C13H14N2O3S0	13	14	2	3	0
245.097	24038935	C18H14N0O1S0	18	14	0	1	0
245.103	6228505	C11H18N0O6S0	11	18	0	6	0
245.108	5961755	C17H14N2O0S0	17	14	2	0	0
245.118	242089502	C15H18N0O3S0	15	18	0	3	0
245.122	9387039	C12H22N0O3S1	12	22	0	3	1
245.13	19247649	C14H18N2O2S0	14	18	2	2	0
245.139	4154661	C12H22N0O5S0	12	22	0	5	0
245.155	231063081	C16H22N0O2S0	16	22	0	2	0
245.191	83193397	C17H26N0O1S0	17	26	0	1	0
246.023	24344378	C12H9N1O3S1	12	9	1	3	1
246.041	18646848	C12H9N1O5S0	12	9	1	5	0
246.044	7988545	C9H13N1O5S1	9	13	1	5	1
246.056	5246789	C16H9N1O2S0	16	9	1	2	0
246.059	117120838	C13H13N1O2S1	13	13	1	2	1
246.077	53346124	C13H13N1O4S0	13	13	1	4	0
246.081	5926477	C10H17N1O4S1	10	17	1	4	1
246.092	26091345	C17H13N1O1S0	17	13	1	1	0
246.096	11280210	C14H17N1O1S1	14	17	1	1	1
246.114	53866327	C14H17N1O3S0	14	17	1	3	0
246.117	17995608	C11H21N1O3S1	11	21	1	3	1
246.129	12390236	C18H17N1O0S0	18	17	1	0	0
246.15	39182179	C15H21N1O2S0	15	21	1	2	0
246.186	14487407	C16H25N1O1S0	16	25	1	1	0
246.974	6226801	C8H8N0O5S2	8	8	0	5	2
246.989	6294902	C12H8N0O2S2	12	8	0	2	2
247.007	23316604	C12H8N0O4S1	12	8	0	4	1
247.01	6461053	C9H12N0O4S2	9	12	0	4	2
247.025	9050242	C12H8N0O6S0	12	8	0	6	0
247.028	6613635	C9H12N0O6S1	9	12	0	6	1
247.043	47161480	C13H12N0O3S1	13	12	0	3	1
247.061	67293326	C13H12N0O5S0	13	12	0	5	0
247.065	21911695	C10H16N0O5S1	10	16	0	5	1
247.072	14607505	C12H12N2O4S0	12	12	2	4	0
247.076	26443923	C17H12N0O2S0	17	12	0	2	0
247.08	21445780	C14H16N0O2S1	14	16	0	2	1
247.088	12709015	C16H12N2O1S0	16	12	2	1	0
247.098	186794138	C14H16N0O4S0	14	16	0	4	0
247.101	14023835	C11H20N0O4S1	11	20	0	4	1
247.109	14539934	C13H16N2O3S0	13	16	2	3	0
247.113	58749087	C18H16N0O1S0	18	16	0	1	0
247.116	10396320	C15H20N0O1S1	15	20	0	1	1
247.134	275628198	C15H20N0O3S0	15	20	0	3	0
247.137	8678567	C12H24N0O3S1	12	24	0	3	1
247.145	8174762	C14H20N2O2S0	14	20	2	2	0
247.17	333430962	C16H24N0O2S0	16	24	0	2	0
247.207	52789439	C17H28N0O1S0	17	28	0	1	0
248.002	10786257	C11H7N1O4S1	11	7	1	4	1
248.039	29899230	C12H11N1O3S1	12	11	1	3	1
248.057	19493348	C12H11N1O5S0	12	11	1	5	0
248.06	5939685	C9H15N1O5S1	9	15	1	5	1
248.072	23204330	C16H11N1O2S0	16	11	1	2	0
248.075	24680939	C13H15N1O2S1	13	15	1	2	1
248.093	40927729	C13H15N1O4S0	13	15	1	4	0
248.096	5387506	C10H19N1O4S1	10	19	1	4	1
248.108	48075254	C17H15N1O1S0	17	15	1	1	0
248.112	6359032	C14H19N1O1S1	14	19	1	1	1
248.129	30507518	C14H19N1O3S0	14	19	1	3	0
248.145	27189763	C18H19N1O0S0	18	19	1	0	0
248.166	14511627	C15H23N1O2S0	15	23	1	2	0
248.202	3727128	C16H27N1O1S0	16	27	1	1	0
248.969	6908208	C11H6N0O3S2	11	6	0	3	2
248.986	4521783	C11H6N0O5S1	11	6	0	5	1
248.99	5771064	C8H10N0O5S2	8	10	0	5	2
249.005	13300542	C12H10N0O2S2	12	10	0	2	2
249.023	36471620	C12H10N0O4S1	12	10	0	4	1
249.026	6734150	C9H14N0O4S2	9	14	0	4	2
249.04	15137611	C12H10N0O6S0	12	10	0	6	0
249.044	11160396	C9H14N0O6S1	9	14	0	6	1
249.052	5000015	C11H10N2O5S0	11	10	2	5	0
249.056	20939601	C16H10N0O3S0	16	10	0	3	0
249.059	40721234	C13H14N0O3S1	13	14	0	3	1
249.067	11176789	C15H10N2O2S0	15	10	2	2	0
249.077	146277209	C13H14N0O5S0	13	14	0	5	0
249.08	27945818	C10H18N0O5S1	10	18	0	5	1
249.088	11392349	C12H14N2O4S0	12	14	2	4	0
249.092	70517599	C17H14N0O2S0	17	14	0	2	0
249.095	11323232	C14H18N0O2S1	14	18	0	2	1
249.103	18647907	C16H14N2O1S0	16	14	2	1	0
249.113	125625191	C14H18N0O4S0	14	18	0	4	0
249.117	5374056	C11H22N0O4S1	11	22	0	4	1
249.124	7404907	C13H18N2O3S0	13	18	2	3	0
249.128	73753452	C18H18N0O1S0	18	18	0	1	0
249.14	9310065	C17H18N2O0S0	17	18	2	0	0
249.15	363135860	C15H22N0O3S0	15	22	0	3	0
249.186	272565122	C16H26N0O2S0	16	26	0	2	0
249.222	11106192	C17H30N0O1S0	17	30	0	1	0
250.018	12848328	C11H9N1O4S1	11	9	1	4	1
250.033	3833294	C15H9N1O1S1	15	9	1	1	1
250.051	14135509	C15H9N1O3S0	15	9	1	3	0
250.054	34305238	C12H13N1O3S1	12	13	1	3	1
250.072	23209181	C12H13N1O5S0	12	13	1	5	0
250.076	6107359	C9H17N1O5S1	9	17	1	5	1
250.087	47666404	C16H13N1O2S0	16	13	1	2	0
250.091	13552869	C13H17N1O2S1	13	17	1	2	1
250.109	20779244	C13H17N1O4S0	13	17	1	4	0
250.112	7429358	C10H21N1O4S1	10	21	1	4	1
250.124	48825586	C17H17N1O1S0	17	17	1	1	0
250.127	4285812	C14H21N1O1S1	14	21	1	1	1
250.145	38712571	C14H21N1O3S0	14	21	1	3	0
250.16	33631489	C18H21N1O0S0	18	21	1	0	0
250.181	4202250	C15H25N1O2S0	15	25	1	2	0
250.984	13027931	C11H8N0O3S2	11	8	0	3	2
251.002	11478626	C11H8N0O5S1	11	8	0	5	1
251.005	5817956	C8H12N0O5S2	8	12	0	5	2
251.021	11752043	C12H12N0O2S2	12	12	0	2	2
251.035	9850993	C15H8N0O4S0	15	8	0	4	0
251.038	29576818	C12H12N0O4S1	12	12	0	4	1
251.042	7793268	C9H16N0O4S2	9	16	0	4	2
251.046	6434934	C14H8N2O3S0	14	8	2	3	0
251.054	6538105	C16H12N0O1S1	16	12	0	1	1
251.056	36077178	C12H12N0O6S0	12	12	0	6	0
251.06	12254843	C9H16N0O6S1	9	16	0	6	1
251.067	4354559	C11H12N2O5S0	11	12	2	5	0
251.071	55051905	C16H12N0O3S0	16	12	0	3	0
251.075	21659266	C13H16N0O3S1	13	16	0	3	1
251.083	19900037	C15H12N2O2S0	15	12	2	2	0
251.093	59618954	C13H16N0O5S0	13	16	0	5	0
251.096	40908427	C10H20N0O5S1	10	20	0	5	1
251.104	7291535	C12H16N2O4S0	12	16	2	4	0
251.108	116328080	C17H16N0O2S0	17	16	0	2	0
251.111	8939666	C14H20N0O2S1	14	20	0	2	1
251.119	21333653	C16H16N2O1S0	16	16	2	1	0
251.129	253216410	C14H20N0O4S0	14	20	0	4	0
251.14	3334303	C13H20N2O3S0	13	20	2	3	0
251.144	92522144	C18H20N0O1S0	18	20	0	1	0
251.155	7685797	C17H20N2O0S0	17	20	2	0	0
251.165	310527658	C15H24N0O3S0	15	24	0	3	0
251.176	3405743	C14H24N2O2S0	14	24	2	2	0
251.202	110159546	C16H28N0O2S0	16	28	0	2	0
251.997	4731682	C10H7N1O5S1	10	7	1	5	1
252.012	3558186	C14H7N1O2S1	14	7	1	2	1
252.03	4801330	C14H7N1O4S0	14	7	1	4	0
252.034	17716275	C11H11N1O4S1	11	11	1	4	1
252.049	7119419	C15H11N1O1S1	15	11	1	1	1
252.051	4763196	C11H11N1O6S0	11	11	1	6	0
252.067	43739203	C15H11N1O3S0	15	11	1	3	0
252.07	17119301	C12H15N1O3S1	12	15	1	3	1
252.088	12580941	C12H15N1O5S0	12	15	1	5	0
252.103	82126932	C16H15N1O2S0	16	15	1	2	0
252.106	4429654	C13H19N1O2S1	13	19	1	2	1
252.124	10259550	C13H19N1O4S0	13	19	1	4	0
252.139	58153061	C17H19N1O1S0	17	19	1	1	0
252.161	10644591	C14H23N1O3S0	14	23	1	3	0
252.176	14255223	C18H23N1O0S0	18	23	1	0	0
252.964	3321336	C10H6N0O4S2	10	6	0	4	2
252.981	4308737	C10H6N0O6S1	10	6	0	6	1
253	15634955	C11H10N0O3S2	11	10	0	3	2
253.014	4262418	C14H6N0O5S0	14	6	0	5	0
253.018	18236948	C11H10N0O5S1	11	10	0	5	1
253.021	16679445	C8H14N0O5S2	8	14	0	5	2
253.033	6733339	C15H10N0O2S1	15	10	0	2	1
253.036	6736925	C12H14N0O2S2	12	14	0	2	2
253.051	30566949	C15H10N0O4S0	15	10	0	4	0
253.054	44317222	C12H14N0O4S1	12	14	0	4	1
253.057	17118760	C9H18N0O4S2	9	18	0	4	2
253.062	16327210	C14H10N2O3S0	14	10	2	3	0
253.069	8788014	C16H14N0O1S1	16	14	0	1	1
253.072	15586863	C12H14N0O6S0	12	14	0	6	0
253.083	4937845	C11H14N2O5S0	11	14	2	5	0
253.087	121014839	C16H14N0O3S0	16	14	0	3	0
253.09	26413625	C13H18N0O3S1	13	18	0	3	1
253.098	39260733	C15H14N2O2S0	15	14	2	2	0
253.108	63007298	C13H18N0O5S0	13	18	0	5	0
253.119	4566600	C12H18N2O4S0	12	18	2	4	0
253.123	154421834	C17H18N0O2S0	17	18	0	2	0
253.127	5520971	C14H22N0O2S1	14	22	0	2	1
253.135	14938703	C16H18N2O1S0	16	18	2	1	0
253.145	737102420	C14H22N0O4S0	14	22	0	4	0
253.156	4204378	C13H22N2O3S0	13	22	2	3	0
253.16	120924764	C18H22N0O1S0	18	22	0	1	0
253.181	131033703	C15H26N0O3S0	15	26	0	3	0
253.217	17382010	C16H30N0O2S0	16	30	0	2	0
254.013	5875234	C10H9N1O5S1	10	9	1	5	1
254.028	11370538	C14H9N1O2S1	14	9	1	2	1
254.046	21095476	C14H9N1O4S0	14	9	1	4	0
254.049	17555510	C11H13N1O4S1	11	13	1	4	1
254.065	17249342	C15H13N1O1S1	15	13	1	1	1
254.067	3842880	C11H13N1O6S0	11	13	1	6	0
254.082	68234312	C15H13N1O3S0	15	13	1	3	0
254.086	16411722	C12H17N1O3S1	12	17	1	3	1
254.103	10332244	C12H17N1O5S0	12	17	1	5	0
254.119	72854620	C16H17N1O2S0	16	17	1	2	0
254.14	3591784	C13H21N1O4S0	13	21	1	4	0
254.155	51084400	C17H21N1O1S0	17	21	1	1	0
254.191	11364485	C18H25N1O0S0	18	25	1	0	0
254.979	7026251	C10H8N0O4S2	10	8	0	4	2
254.997	5720918	C10H8N0O6S1	10	8	0	6	1
255.012	6590047	C14H8N0O3S1	14	8	0	3	1
255.016	7942753	C11H12N0O3S2	11	12	0	3	2
255.03	10594922	C14H8N0O5S0	14	8	0	5	0
255.033	26773100	C11H12N0O5S1	11	12	0	5	1
255.037	10807918	C8H16N0O5S2	8	16	0	5	2
255.041	7236720	C13H8N2O4S0	13	8	2	4	0
255.049	21675637	C15H12N0O2S1	15	12	0	2	1
255.066	84160127	C15H12N0O4S0	15	12	0	4	0
255.07	40926849	C12H16N0O4S1	12	16	0	4	1
255.078	29236870	C14H12N2O3S0	14	12	2	3	0
255.087	18010764	C12H16N0O6S0	12	16	0	6	0
255.103	180047509	C16H16N0O3S0	16	16	0	3	0
255.106	16392855	C13H20N0O3S1	13	20	0	3	1
255.114	36816540	C15H16N2O2S0	15	16	2	2	0
255.124	60100258	C13H20N0O5S0	13	20	0	5	0
255.139	227167915	C17H20N0O2S0	17	20	0	2	0
255.142	3437485	C14H24N0O2S1	14	24	0	2	1
255.15	13312690	C16H20N2O1S0	16	20	2	1	0
255.16	175836856	C14H24N0O4S0	14	24	0	4	0
255.175	91115201	C18H24N0O1S0	18	24	0	1	0
255.187	5864136	C17H24N2O0S0	17	24	2	0	0
255.197	5963982	C15H28N0O3S0	15	28	0	3	0
255.233	232279780	C16H32N0O2S0	16	32	0	2	0
256.007	4224714	C13H7N1O3S1	13	7	1	3	1
256.025	6691030	C13H7N1O5S0	13	7	1	5	0
256.029	6059736	C10H11N1O5S1	10	11	1	5	1
256.044	29417698	C14H11N1O2S1	14	11	1	2	1
256.062	46268654	C14H11N1O4S0	14	11	1	4	0
256.065	15664368	C11H15N1O4S1	11	15	1	4	1
256.08	15075578	C15H15N1O1S1	15	15	1	1	1
256.098	88477957	C15H15N1O3S0	15	15	1	3	0
256.101	9012488	C12H19N1O3S1	12	19	1	3	1
256.113	6622991	C19H15N1O0S0	19	15	1	0	0
256.134	72360221	C16H19N1O2S0	16	19	1	2	0
256.171	31969589	C17H23N1O1S0	17	23	1	1	0
256.207	16258381	C18H27N1O0S0	18	27	1	0	0
256.973	7329622	C13H6N0O2S2	13	6	0	2	2
256.995	4665701	C10H10N0O4S2	10	10	0	4	2
257.009	3355503	C13H6N0O6S0	13	6	0	6	0
257.013	6753649	C10H10N0O6S1	10	10	0	6	1
257.028	23911292	C14H10N0O3S1	14	10	0	3	1
257.031	3405662	C11H14N0O3S2	11	14	0	3	2
257.046	31077257	C14H10N0O5S0	14	10	0	5	0
257.049	81064843	C11H14N0O5S1	11	14	0	5	1
257.057	13302673	C13H10N2O4S0	13	10	2	4	0
257.064	23909270	C15H14N0O2S1	15	14	0	2	1
257.082	122516386	C15H14N0O4S0	15	14	0	4	0
257.085	24064933	C12H18N0O4S1	12	18	0	4	1
257.093	32273322	C14H14N2O3S0	14	14	2	3	0
257.097	16093101	C19H14N0O1S0	19	14	0	1	0
257.103	16606129	C12H18N0O6S0	12	18	0	6	0
257.118	198448060	C16H18N0O3S0	16	18	0	3	0
257.122	13935550	C13H22N0O3S1	13	22	0	3	1
257.13	23239620	C15H18N2O2S0	15	18	2	2	0
257.139	29647819	C13H22N0O5S0	13	22	0	5	0
257.155	392090582	C17H22N0O2S0	17	22	0	2	0
257.166	5140958	C16H22N2O1S0	16	22	2	1	0
257.176	9144293	C14H26N0O4S0	14	26	0	4	0
257.191	72324080	C18H26N0O1S0	18	26	0	1	0
258.023	21183059	C13H9N1O3S1	13	9	1	3	1
258.041	13426273	C13H9N1O5S0	13	9	1	5	0
258.044	9198179	C10H13N1O5S1	10	13	1	5	1
258.059	34211439	C14H13N1O2S1	14	13	1	2	1
258.077	63743612	C14H13N1O4S0	14	13	1	4	0
258.081	11549311	C11H17N1O4S1	11	17	1	4	1
258.092	12395144	C18H13N1O1S0	18	13	1	1	0
258.096	18722443	C15H17N1O1S1	15	17	1	1	1
258.114	68286104	C15H17N1O3S0	15	17	1	3	0
258.117	26650267	C12H21N1O3S1	12	21	1	3	1
258.129	12047012	C19H17N1O0S0	19	17	1	0	0
258.15	58316468	C16H21N1O2S0	16	21	1	2	0
258.186	19568336	C17H25N1O1S0	17	25	1	1	0
258.223	4866284	C18H29N1O0S0	18	29	1	0	0
258.989	4309319	C13H8N0O2S2	13	8	0	2	2
259.007	18614613	C13H8N0O4S1	13	8	0	4	1
259.025	10940772	C13H8N0O6S0	13	8	0	6	0
259.028	17163623	C10H12N0O6S1	10	12	0	6	1
259.036	3633389	C12H8N2O5S0	12	8	2	5	0
259.043	38263155	C14H12N0O3S1	14	12	0	3	1
259.047	4012150	C11H16N0O3S2	11	16	0	3	2
259.061	69839233	C14H12N0O5S0	14	12	0	5	0
259.065	26118532	C11H16N0O5S1	11	16	0	5	1
259.072	18669962	C13H12N2O4S0	13	12	2	4	0
259.076	17487246	C18H12N0O2S0	18	12	0	2	0
259.08	23083408	C15H16N0O2S1	15	16	0	2	1
259.088	4946071	C17H12N2O1S0	17	12	2	1	0
259.098	170908063	C15H16N0O4S0	15	16	0	4	0
259.101	23986594	C12H20N0O4S1	12	20	0	4	1
259.109	25749928	C14H16N2O3S0	14	16	2	3	0
259.113	28162475	C19H16N0O1S0	19	16	0	1	0
259.119	6306736	C12H20N0O6S0	12	20	0	6	0
259.134	259873212	C16H20N0O3S0	16	20	0	3	0
259.137	19025343	C13H24N0O3S1	13	24	0	3	1
259.145	15523270	C15H20N2O2S0	15	20	2	2	0
259.155	3740366	C13H24N0O5S0	13	24	0	5	0
259.17	205117914	C17H24N0O2S0	17	24	0	2	0
259.182	3402723	C16H24N2O1S0	16	24	2	1	0
259.207	59079160	C18H28N0O1S0	18	28	0	1	0
260.002	10072210	C12H7N1O4S1	12	7	1	4	1
260.023	4185252	C9H11N1O6S1	9	11	1	6	1
260.039	29484210	C13H11N1O3S1	13	11	1	3	1
260.056	27714753	C13H11N1O5S0	13	11	1	5	0
260.06	8495812	C10H15N1O5S1	10	15	1	5	1
260.072	14888142	C17H11N1O2S0	17	11	1	2	0
260.075	35327185	C14H15N1O2S1	14	15	1	2	1
260.093	48360672	C14H15N1O4S0	14	15	1	4	0
260.096	8301283	C11H19N1O4S1	11	19	1	4	1
260.108	29887725	C18H15N1O1S0	18	15	1	1	0
260.111	7351536	C15H19N1O1S1	15	19	1	1	1
260.129	43822336	C15H19N1O3S0	15	19	1	3	0
260.133	12123394	C12H23N1O3S1	12	23	1	3	1
260.144	15646989	C19H19N1O0S0	19	19	1	0	0
260.166	33778975	C16H23N1O2S0	16	23	1	2	0
260.202	8619326	C17H27N1O1S0	17	27	1	1	0
260.969	3515109	C12H6N0O3S2	12	6	0	3	2
260.986	4716021	C12H6N0O5S1	12	6	0	5	1
260.99	5529592	C9H10N0O5S2	9	10	0	5	2
261.005	9315846	C13H10N0O2S2	13	10	0	2	2
261.023	33933334	C13H10N0O4S1	13	10	0	4	1
261.026	5356569	C10H14N0O4S2	10	14	0	4	2
261.04	18594854	C13H10N0O6S0	13	10	0	6	0
261.044	8439849	C10H14N0O6S1	10	14	0	6	1
261.052	4771889	C12H10N2O5S0	12	10	2	5	0
261.056	12183604	C17H10N0O3S0	17	10	0	3	0
261.059	48611383	C14H14N0O3S1	14	14	0	3	1
261.067	7866942	C16H10N2O2S0	16	10	2	2	0
261.077	85704775	C14H14N0O5S0	14	14	0	5	0
261.08	24586314	C11H18N0O5S1	11	18	0	5	1
261.088	17396818	C13H14N2O4S0	13	14	2	4	0
261.092	35090517	C18H14N0O2S0	18	14	0	2	0
261.096	17170520	C15H18N0O2S1	15	18	0	2	1
261.103	13950048	C17H14N2O1S0	17	14	2	1	0
261.113	174694505	C15H18N0O4S0	15	18	0	4	0
261.117	13315180	C12H22N0O4S1	12	22	0	4	1
261.125	13762675	C14H18N2O3S0	14	18	2	3	0
261.129	56045686	C19H18N0O1S0	19	18	0	1	0
261.14	5582977	C18H18N2O0S0	18	18	2	0	0
261.15	285139082	C16H22N0O3S0	16	22	0	3	0
261.153	5155981	C13H26N0O3S1	13	26	0	3	1
261.161	5362836	C15H22N2O2S0	15	22	2	2	0
261.186	199680171	C17H26N0O2S0	17	26	0	2	0
261.222	31373516	C18H30N0O1S0	18	30	0	1	0
262.018	19412915	C12H9N1O4S1	12	9	1	4	1
262.036	5879748	C12H9N1O6S0	12	9	1	6	0
262.051	10857427	C16H9N1O3S0	16	9	1	3	0
262.054	38843350	C13H13N1O3S1	13	13	1	3	1
262.072	26616807	C13H13N1O5S0	13	13	1	5	0
262.076	6657002	C10H17N1O5S1	10	17	1	5	1
262.087	36445173	C17H13N1O2S0	17	13	1	2	0
262.091	16549881	C14H17N1O2S1	14	17	1	2	1
262.109	32918537	C14H17N1O4S0	14	17	1	4	0
262.112	8667149	C11H21N1O4S1	11	21	1	4	1
262.124	56017944	C18H17N1O1S0	18	17	1	1	0
262.127	4025115	C15H21N1O1S1	15	21	1	1	1
262.145	28585004	C15H21N1O3S0	15	21	1	3	0
262.16	26913851	C19H21N1O0S0	19	21	1	0	0
262.181	9565263	C16H25N1O2S0	16	25	1	2	0
262.218	4427378	C17H29N1O1S0	17	29	1	1	0
262.984	11751264	C12H8N0O3S2	12	8	0	3	2
263.002	13212529	C12H8N0O5S1	12	8	0	5	1
263.005	3619700	C9H12N0O5S2	9	12	0	5	2
263.021	9599876	C13H12N0O2S2	13	12	0	2	2
263.023	10910598	C9H12N0O7S1	9	12	0	7	1
263.035	4544146	C16H8N0O4S0	16	8	0	4	0
263.038	48064405	C13H12N0O4S1	13	12	0	4	1
263.042	5808537	C10H16N0O4S2	10	16	0	4	2
263.046	5015453	C15H8N2O3S0	15	8	2	3	0
263.056	24756135	C13H12N0O6S0	13	12	0	6	0
263.059	15487914	C10H16N0O6S1	10	16	0	6	1
263.067	9194418	C12H12N2O5S0	12	12	2	5	0
263.071	38492086	C17H12N0O3S0	17	12	0	3	0
263.075	27158458	C14H16N0O3S1	14	16	0	3	1
263.083	16051138	C16H12N2O2S0	16	12	2	2	0
263.092	87476171	C14H16N0O5S0	14	16	0	5	0
263.096	34064335	C11H20N0O5S1	11	20	0	5	1
263.104	10293719	C13H16N2O4S0	13	16	2	4	0
263.108	71677915	C18H16N0O2S0	18	16	0	2	0
263.111	8592350	C15H20N0O2S1	15	20	0	2	1
263.119	17498086	C17H16N2O1S0	17	16	2	1	0
263.129	129132528	C15H20N0O4S0	15	20	0	4	0
263.132	3708147	C12H24N0O4S1	12	24	0	4	1
263.14	5843707	C14H20N2O3S0	14	20	2	3	0
263.144	58120191	C19H20N0O1S0	19	20	0	1	0
263.155	7075338	C18H20N2O0S0	18	20	2	0	0
263.165	279177236	C16H24N0O3S0	16	24	0	3	0
263.202	116344889	C17H28N0O2S0	17	28	0	2	0
263.238	5732957	C18H32N0O1S0	18	32	0	1	0
263.997	3662181	C11H7N1O5S1	11	7	1	5	1
264.034	19037066	C12H11N1O4S1	12	11	1	4	1
264.049	4039578	C16H11N1O1S1	16	11	1	1	1
264.051	6693277	C12H11N1O6S0	12	11	1	6	0
264.055	78449568	C9H15N1O6S1	9	15	1	6	1
264.067	29291437	C16H11N1O3S0	16	11	1	3	0
264.07	31038384	C13H15N1O3S1	13	15	1	3	1
264.088	18219971	C13H15N1O5S0	13	15	1	5	0
264.091	10163142	C10H19N1O5S1	10	19	1	5	1
264.103	53754834	C17H15N1O2S0	17	15	1	2	0
264.106	7273430	C14H19N1O2S1	14	19	1	2	1
264.124	14923752	C14H19N1O4S0	14	19	1	4	0
264.127	3856364	C11H23N1O4S1	11	23	1	4	1
264.139	46005240	C18H19N1O1S0	18	19	1	1	0
264.161	24376334	C15H23N1O3S0	15	23	1	3	0
264.176	23405598	C19H23N1O0S0	19	23	1	0	0
264.197	3743796	C16H27N1O2S0	16	27	1	2	0
264.963	5330273	C11H6N0O4S2	11	6	0	4	2
265	18703241	C12H10N0O3S2	12	10	0	3	2
265.018	22366108	C12H10N0O5S1	12	10	0	5	1
265.021	6621087	C9H14N0O5S2	9	14	0	5	2
265.033	3757996	C16H10N0O2S1	16	10	0	2	1
265.036	5150896	C13H14N0O2S2	13	14	0	2	2
265.051	23906239	C16H10N0O4S0	16	10	0	4	0
265.054	34494403	C13H14N0O4S1	13	14	0	4	1
265.062	12477388	C15H10N2O3S0	15	10	2	3	0
265.072	38408150	C13H14N0O6S0	13	14	0	6	0
265.075	18085850	C10H18N0O6S1	10	18	0	6	1
265.083	5642722	C12H14N2O5S0	12	14	2	5	0
265.087	83554279	C17H14N0O3S0	17	14	0	3	0
265.09	19119082	C14H18N0O3S1	14	18	0	3	1
265.098	29986803	C16H14N2O2S0	16	14	2	2	0
265.108	66109438	C14H18N0O5S0	14	18	0	5	0
265.112	18180097	C11H22N0O5S1	11	22	0	5	1
265.119	5388298	C13H18N2O4S0	13	18	2	4	0
265.123	145903630	C18H18N0O2S0	18	18	0	2	0
265.127	13892626	C15H22N0O2S1	15	22	0	2	1
265.135	19267610	C17H18N2O1S0	17	18	2	1	0
265.145	401928229	C15H22N0O4S0	15	22	0	4	0
265.148	33144873	C12H26N0O4S1	12	26	0	4	1
265.16	77860917	C19H22N0O1S0	19	22	0	1	0
265.171	4985922	C18H22N2O0S0	18	22	2	0	0
265.181	176549964	C16H26N0O3S0	16	26	0	3	0
265.217	36487284	C17H30N0O2S0	17	30	0	2	0
266.013	11306976	C11H9N1O5S1	11	9	1	5	1
266.028	5095153	C15H9N1O2S1	15	9	1	2	1
266.046	14985221	C15H9N1O4S0	15	9	1	4	0
266.049	19295240	C12H13N1O4S1	12	13	1	4	1
266.065	9182745	C16H13N1O1S1	16	13	1	1	1
266.067	5413404	C12H13N1O6S0	12	13	1	6	0
266.082	66225197	C16H13N1O3S0	16	13	1	3	0
266.086	15433777	C13H17N1O3S1	13	17	1	3	1
266.103	10927173	C13H17N1O5S0	13	17	1	5	0
266.107	5501513	C10H21N1O5S1	10	21	1	5	1
266.119	80385110	C17H17N1O2S0	17	17	1	2	0
266.122	3984986	C14H21N1O2S1	14	21	1	2	1
266.14	8369774	C14H21N1O4S0	14	21	1	4	0
266.155	57021567	C18H21N1O1S0	18	21	1	1	0
266.176	7660694	C15H25N1O3S0	15	25	1	3	0
266.191	11153576	C19H25N1O0S0	19	25	1	0	0
266.979	9837607	C11H8N0O4S2	11	8	0	4	2
267.012	4312653	C15H8N0O3S1	15	8	0	3	1
267.016	11291729	C12H12N0O3S2	12	12	0	3	2
267.03	6937698	C15H8N0O5S0	15	8	0	5	0
267.033	22771813	C12H12N0O5S1	12	12	0	5	1
267.037	16312425	C9H16N0O5S2	9	16	0	5	2
267.049	10859639	C16H12N0O2S1	16	12	0	2	1
267.051	3948154	C12H12N0O7S0	12	12	0	7	0
267.066	48601228	C16H12N0O4S0	16	12	0	4	0
267.07	41465999	C13H16N0O4S1	13	16	0	4	1
267.073	4574099	C10H20N0O4S2	10	20	0	4	2
267.078	24340633	C15H12N2O3S0	15	12	2	3	0
267.087	17418404	C13H16N0O6S0	13	16	0	6	0
267.091	9505960	C10H20N0O6S1	10	20	0	6	1
267.099	4252337	C12H16N2O5S0	12	16	2	5	0
267.103	125221046	C17H16N0O3S0	17	16	0	3	0
267.106	29761721	C14H20N0O3S1	14	20	0	3	1
267.114	30916803	C16H16N2O2S0	16	16	2	2	0
267.124	58366158	C14H20N0O5S0	14	20	0	5	0
267.139	125614304	C18H20N0O2S0	18	20	0	2	0
267.142	7870180	C15H24N0O2S1	15	24	0	2	1
267.15	10995949	C17H20N2O1S0	17	20	2	1	0
267.16	565213432	C15H24N0O4S0	15	24	0	4	0
267.175	73316618	C19H24N0O1S0	19	24	0	1	0
267.197	42993954	C16H28N0O3S0	16	28	0	3	0
267.233	6323020	C17H32N0O2S0	17	32	0	2	0
268.007	4034009	C14H7N1O3S1	14	7	1	3	1
268.029	8805618	C11H11N1O5S1	11	11	1	5	1
268.044	15601924	C15H11N1O2S1	15	11	1	2	1
268.062	32460057	C15H11N1O4S0	15	11	1	4	0
268.065	14483741	C12H15N1O4S1	12	15	1	4	1
268.08	12655919	C16H15N1O1S1	16	15	1	1	1
268.083	4235570	C12H15N1O6S0	12	15	1	6	0
268.098	61893957	C16H15N1O3S0	16	15	1	3	0
268.101	9874761	C13H19N1O3S1	13	19	1	3	1
268.119	8257374	C13H19N1O5S0	13	19	1	5	0
268.134	63855984	C17H19N1O2S0	17	19	1	2	0
268.171	37502363	C18H23N1O1S0	18	23	1	1	0
268.207	11828679	C19H27N1O0S0	19	27	1	0	0
268.995	6437757	C11H10N0O4S2	11	10	0	4	2
269.013	10276242	C11H10N0O6S1	11	10	0	6	1
269.028	11570597	C15H10N0O3S1	15	10	0	3	1
269.031	4368809	C12H14N0O3S2	12	14	0	3	2
269.046	23364026	C15H10N0O5S0	15	10	0	5	0
269.049	31351231	C12H14N0O5S1	12	14	0	5	1
269.052	14931395	C9H18N0O5S2	9	18	0	5	2
269.057	11811272	C14H10N2O4S0	14	10	2	4	0
269.064	17088977	C16H14N0O2S1	16	14	0	2	1
269.067	4177364	C12H14N0O7S0	12	14	0	7	0
269.082	90112487	C16H14N0O4S0	16	14	0	4	0
269.085	34187755	C13H18N0O4S1	13	18	0	4	1
269.093	26534389	C15H14N2O3S0	15	14	2	3	0
269.097	9009657	C20H14N0O1S0	20	14	0	1	0
269.103	27046401	C13H18N0O6S0	13	18	0	6	0
269.118	162185747	C17H18N0O3S0	17	18	0	3	0
269.122	17206808	C14H22N0O3S1	14	22	0	3	1
269.13	21801505	C16H18N2O2S0	16	18	2	2	0
269.14	63205933	C14H22N0O5S0	14	22	0	5	0
269.155	232309312	C18H22N0O2S0	18	22	0	2	0
269.166	10552910	C17H22N2O1S0	17	22	2	1	0
269.176	112943706	C15H26N0O4S0	15	26	0	4	0
269.191	59298412	C19H26N0O1S0	19	26	0	1	0
269.212	5622406	C16H30N0O3S0	16	30	0	3	0
269.249	35400371	C17H34N0O2S0	17	34	0	2	0
270.008	3762271	C10H9N1O6S1	10	9	1	6	1
270.023	13881970	C14H9N1O3S1	14	9	1	3	1
270.041	10394248	C14H9N1O5S0	14	9	1	5	0
270.044	10955404	C11H13N1O5S1	11	13	1	5	1
270.059	28364447	C15H13N1O2S1	15	13	1	2	1
270.077	53315254	C15H13N1O4S0	15	13	1	4	0
270.081	14311098	C12H17N1O4S1	12	17	1	4	1
270.093	6978249	C19H13N1O1S0	19	13	1	1	0
270.096	10279629	C16H17N1O1S1	16	17	1	1	1
270.114	63178467	C16H17N1O3S0	16	17	1	3	0
270.117	8300775	C13H21N1O3S1	13	21	1	3	1
270.129	7158518	C20H17N1O0S0	20	17	1	0	0
270.15	48826129	C17H21N1O2S0	17	21	1	2	0
270.186	25102142	C18H25N1O1S0	18	25	1	1	0
270.223	9276780	C19H29N1O0S0	19	29	1	0	0
270.974	3453988	C10H8N0O5S2	10	8	0	5	2
270.989	18764599	C14H8N0O2S2	14	8	0	2	2
270.992	4113466	C10H8N0O7S1	10	8	0	7	1
271.007	9066318	C14H8N0O4S1	14	8	0	4	1
271.01	7748434	C11H12N0O4S2	11	12	0	4	2
271.025	7209828	C14H8N0O6S0	14	8	0	6	0
271.028	9962345	C11H12N0O6S1	11	12	0	6	1
271.036	5474163	C13H8N2O5S0	13	8	2	5	0
271.043	28263292	C15H12N0O3S1	15	12	0	3	1
271.061	45796243	C15H12N0O5S0	15	12	0	5	0
271.065	227183511	C12H16N0O5S1	12	16	0	5	1
271.072	17593249	C14H12N2O4S0	14	12	2	4	0
271.076	8629158	C19H12N0O2S0	19	12	0	2	0
271.08	16824235	C16H16N0O2S1	16	16	0	2	1
271.098	104549314	C16H16N0O4S0	16	16	0	4	0
271.101	21826502	C13H20N0O4S1	13	20	0	4	1
271.109	22408144	C15H16N2O3S0	15	16	2	3	0
271.113	17373141	C20H16N0O1S0	20	16	0	1	0
271.119	21072861	C13H20N0O6S0	13	20	0	6	0
271.134	169577456	C17H20N0O3S0	17	20	0	3	0
271.137	15840244	C14H24N0O3S1	14	24	0	3	1
271.145	17829887	C16H20N2O2S0	16	20	2	2	0
271.155	23888907	C14H24N0O5S0	14	24	0	5	0
271.17	254102559	C18H24N0O2S0	18	24	0	2	0
271.191	6225978	C15H28N0O4S0	15	28	0	4	0
271.207	45186125	C19H28N0O1S0	19	28	0	1	0
271.228	4808041	C16H32N0O3S0	16	32	0	3	0
272.002	5684307	C13H7N1O4S1	13	7	1	4	1
272.023	3593583	C10H11N1O6S1	10	11	1	6	1
272.039	24918147	C14H11N1O3S1	14	11	1	3	1
272.056	16948378	C14H11N1O5S0	14	11	1	5	0
272.06	12011678	C11H15N1O5S1	11	15	1	5	1
272.072	5025966	C18H11N1O2S0	18	11	1	2	0
272.075	28190898	C15H15N1O2S1	15	15	1	2	1
272.093	80441545	C15H15N1O4S0	15	15	1	4	0
272.096	11146446	C12H19N1O4S1	12	19	1	4	1
272.108	13943005	C19H15N1O1S0	19	15	1	1	0
272.112	5440226	C16H19N1O1S1	16	19	1	1	1
272.129	41316601	C16H19N1O3S0	16	19	1	3	0
272.133	11535613	C13H23N1O3S1	13	23	1	3	1
272.144	11649293	C20H19N1O0S0	20	19	1	0	0
272.166	42451240	C17H23N1O2S0	17	23	1	2	0
272.202	12242264	C18H27N1O1S0	18	27	1	1	0
272.238	4242568	C19H31N1O0S0	19	31	1	0	0
272.99	4083560	C10H10N0O5S2	10	10	0	5	2
273.005	4394108	C14H10N0O2S2	14	10	0	2	2
273.007	4695935	C10H10N0O7S1	10	10	0	7	1
273.023	23379347	C14H10N0O4S1	14	10	0	4	1
273.026	4481432	C11H14N0O4S2	11	14	0	4	2
273.04	15252907	C14H10N0O6S0	14	10	0	6	0
273.044	25816495	C11H14N0O6S1	11	14	0	6	1
273.052	6017466	C13H10N2O5S0	13	10	2	5	0
273.056	3811519	C18H10N0O3S0	18	10	0	3	0
273.059	28949956	C15H14N0O3S1	15	14	0	3	1
273.063	3754185	C12H18N0O3S2	12	18	0	3	2
273.077	68965851	C15H14N0O5S0	15	14	0	5	0
273.08	20407776	C12H18N0O5S1	12	18	0	5	1
273.088	20876778	C14H14N2O4S0	14	14	2	4	0
273.092	23213552	C19H14N0O2S0	19	14	0	2	0
273.103	6121471	C18H14N2O1S0	18	14	2	1	0
273.113	164025868	C16H18N0O4S0	16	18	0	4	0
273.117	23418384	C13H22N0O4S1	13	22	0	4	1
273.124	17270299	C15H18N2O3S0	15	18	2	3	0
273.129	26648096	C20H18N0O1S0	20	18	0	1	0
273.134	5953064	C13H22N0O6S0	13	22	0	6	0
273.15	196531772	C17H22N0O3S0	17	22	0	3	0
273.153	10877505	C14H26N0O3S1	14	26	0	3	1
273.161	8432203	C16H22N2O2S0	16	22	2	2	0
273.186	136009325	C18H26N0O2S0	18	26	0	2	0
273.222	36705949	C19H30N0O1S0	19	30	0	1	0
274.018	15358666	C13H9N1O4S1	13	9	1	4	1
274.036	4804322	C13H9N1O6S0	13	9	1	6	0
274.039	8805095	C10H13N1O6S1	10	13	1	6	1
274.054	32609020	C14H13N1O3S1	14	13	1	3	1
274.072	26899220	C14H13N1O5S0	14	13	1	5	0
274.075	10359576	C11H17N1O5S1	11	17	1	5	1
274.087	25627432	C18H13N1O2S0	18	13	1	2	0
274.091	19010349	C15H17N1O2S1	15	17	1	2	1
274.109	41347909	C15H17N1O4S0	15	17	1	4	0
274.112	15506250	C12H21N1O4S1	12	21	1	4	1
274.124	32412506	C19H17N1O1S0	19	17	1	1	0
274.145	38497142	C16H21N1O3S0	16	21	1	3	0
274.148	7798139	C13H25N1O3S1	13	25	1	3	1
274.16	16276363	C20H21N1O0S0	20	21	1	0	0
274.181	25645992	C17H25N1O2S0	17	25	1	2	0
274.218	7463897	C18H29N1O1S0	18	29	1	1	0
274.984	7462895	C13H8N0O3S2	13	8	0	3	2
275.002	11216904	C13H8N0O5S1	13	8	0	5	1
275.005	4889613	C10H12N0O5S2	10	12	0	5	2
275.021	6886433	C14H12N0O2S2	14	12	0	2	2
275.038	32395322	C14H12N0O4S1	14	12	0	4	1
275.056	38699090	C14H12N0O6S0	14	12	0	6	0
275.06	15226967	C11H16N0O6S1	11	16	0	6	1
275.067	9784418	C13H12N2O5S0	13	12	2	5	0
275.071	23986279	C18H12N0O3S0	18	12	0	3	0
275.075	32497772	C15H16N0O3S1	15	16	0	3	1
275.083	11360375	C17H12N2O2S0	17	12	2	2	0
275.093	87507076	C15H16N0O5S0	15	16	0	5	0
275.096	25706633	C12H20N0O5S1	12	20	0	5	1
275.104	14520468	C14H16N2O4S0	14	16	2	4	0
275.108	39583897	C19H16N0O2S0	19	16	0	2	0
275.111	14134430	C16H20N0O2S1	16	20	0	2	1
275.119	8740009	C18H16N2O1S0	18	16	2	1	0
275.129	153706678	C16H20N0O4S0	16	20	0	4	0
275.132	13951163	C13H24N0O4S1	13	24	0	4	1
275.14	6411462	C15H20N2O3S0	15	20	2	3	0
275.144	47759563	C20H20N0O1S0	20	20	0	1	0
275.155	5273307	C19H20N2O0S0	19	20	2	0	0
275.165	207462632	C17H24N0O3S0	17	24	0	3	0
275.169	13930733	C14H28N0O3S1	14	28	0	3	1
275.177	4376824	C16H24N2O2S0	16	24	2	2	0
275.202	101998874	C18H28N0O2S0	18	28	0	2	0
275.238	15220044	C19H32N0O1S0	19	32	0	1	0
275.997	4216936	C12H7N1O5S1	12	7	1	5	1
276.034	24403355	C13H11N1O4S1	13	11	1	4	1
276.051	10476979	C13H11N1O6S0	13	11	1	6	0
276.055	4950456	C10H15N1O6S1	10	15	1	6	1
276.067	20227529	C17H11N1O3S0	17	11	1	3	0
276.07	33377741	C14H15N1O3S1	14	15	1	3	1
276.088	28249574	C14H15N1O5S0	14	15	1	5	0
276.091	9503211	C11H19N1O5S1	11	19	1	5	1
276.103	44193275	C18H15N1O2S0	18	15	1	2	0
276.106	13252096	C15H19N1O2S1	15	19	1	2	1
276.124	26836505	C15H19N1O4S0	15	19	1	4	0
276.128	7868446	C12H23N1O4S1	12	23	1	4	1
276.139	50648622	C19H19N1O1S0	19	19	1	1	0
276.161	22881868	C16H23N1O3S0	16	23	1	3	0
276.176	20332129	C20H23N1O0S0	20	23	1	0	0
276.197	5795967	C17H27N1O2S0	17	27	1	2	0
276.964	5789361	C12H6N0O4S2	12	6	0	4	2
277	14770917	C13H10N0O3S2	13	10	0	3	2
277.018	23044862	C13H10N0O5S1	13	10	0	5	1
277.021	5804802	C10H14N0O5S2	10	14	0	5	2
277.035	5959447	C13H10N0O7S0	13	10	0	7	0
277.039	14033692	C10H14N0O7S1	10	14	0	7	1
277.051	12679980	C17H10N0O4S0	17	10	0	4	0
277.054	49212209	C14H14N0O4S1	14	14	0	4	1
277.057	5179702	C11H18N0O4S2	11	18	0	4	2
277.062	6038588	C16H10N2O3S0	16	10	2	3	0
277.072	61979466	C14H14N0O6S0	14	14	0	6	0
277.075	23958351	C11H18N0O6S1	11	18	0	6	1
277.083	7840602	C13H14N2O5S0	13	14	2	5	0
277.087	51669856	C18H14N0O3S0	18	14	0	3	0
277.09	18351972	C15H18N0O3S1	15	18	0	3	1
277.098	18953072	C17H14N2O2S0	17	14	2	2	0
277.108	111029117	C15H18N0O5S0	15	18	0	5	0
277.112	34052994	C12H22N0O5S1	12	22	0	5	1
277.119	9467789	C14H18N2O4S0	14	18	2	4	0
277.123	70052755	C19H18N0O2S0	19	18	0	2	0
277.127	8838552	C16H22N0O2S1	16	22	0	2	1
277.135	15422371	C18H18N2O1S0	18	18	2	1	0
277.145	165882801	C16H22N0O4S0	16	22	0	4	0
277.148	5018037	C13H26N0O4S1	13	26	0	4	1
277.16	47057862	C20H22N0O1S0	20	22	0	1	0
277.171	5058518	C19H22N2O0S0	19	22	2	0	0
277.181	200158180	C17H26N0O3S0	17	26	0	3	0
277.193	3717621	C16H26N2O2S0	16	26	2	2	0
277.217	62737432	C18H30N0O2S0	18	30	0	2	0
277.254	3513163	C19H34N0O1S0	19	34	0	1	0
278.013	7062656	C12H9N1O5S1	12	9	1	5	1
278.046	7042735	C16H9N1O4S0	16	9	1	4	0
278.049	20123828	C13H13N1O4S1	13	13	1	4	1
278.064	5259466	C17H13N1O1S1	17	13	1	1	1
278.067	9201870	C13H13N1O6S0	13	13	1	6	0
278.07	35827922	C10H17N1O6S1	10	17	1	6	1
278.082	45031651	C17H13N1O3S0	17	13	1	3	0
278.086	21192936	C14H17N1O3S1	14	17	1	3	1
278.103	17664257	C14H17N1O5S0	14	17	1	5	0
278.107	5099270	C11H21N1O5S1	11	21	1	5	1
278.119	60743959	C18H17N1O2S0	18	17	1	2	0
278.122	4620572	C15H21N1O2S1	15	21	1	2	1
278.14	11772213	C15H21N1O4S0	15	21	1	4	0
278.155	36577611	C19H21N1O1S0	19	21	1	1	0
278.176	19089769	C16H25N1O3S0	16	25	1	3	0
278.191	11896191	C20H25N1O0S0	20	25	1	0	0
278.979	9561575	C12H8N0O4S2	12	8	0	4	2
279.016	12292636	C13H12N0O3S2	13	12	0	3	2
279.03	5202992	C16H8N0O5S0	16	8	0	5	0
279.033	24800821	C13H12N0O5S1	13	12	0	5	1
279.037	8462906	C10H16N0O5S2	10	16	0	5	2
279.041	4106305	C15H8N2O4S0	15	8	2	4	0
279.049	5851723	C17H12N0O2S1	17	12	0	2	1
279.051	9672271	C13H12N0O7S0	13	12	0	7	0
279.054	7119956	C10H16N0O7S1	10	16	0	7	1
279.066	33789541	C17H12N0O4S0	17	12	0	4	0
279.07	28182122	C14H16N0O4S1	14	16	0	4	1
279.073	5277806	C11H20N0O4S2	11	20	0	4	2
279.078	20098677	C16H12N2O3S0	16	12	2	3	0
279.087	34641539	C14H16N0O6S0	14	16	0	6	0
279.091	22972040	C11H20N0O6S1	11	20	0	6	1
279.099	6490259	C13H16N2O5S0	13	16	2	5	0
279.103	81417881	C18H16N0O3S0	18	16	0	3	0
279.106	22879902	C15H20N0O3S1	15	20	0	3	1
279.114	27944617	C17H16N2O2S0	17	16	2	2	0
279.124	69260984	C15H20N0O5S0	15	20	0	5	0
279.127	10579644	C12H24N0O5S1	12	24	0	5	1
279.135	5973704	C14H20N2O4S0	14	20	2	4	0
279.139	117896909	C19H20N0O2S0	19	20	0	2	0
279.142	12010194	C16H24N0O2S1	16	24	0	2	1
279.15	13837022	C18H20N2O1S0	18	20	2	1	0
279.16	434648812	C16H24N0O4S0	16	24	0	4	0
279.175	59299586	C20H24N0O1S0	20	24	0	1	0
279.197	84490016	C17H28N0O3S0	17	28	0	3	0
279.233	17057621	C18H32N0O2S0	18	32	0	2	0
280.029	11915219	C12H11N1O5S1	12	11	1	5	1
280.044	12506089	C16H11N1O2S1	16	11	1	2	1
280.062	25920514	C16H11N1O4S0	16	11	1	4	0
280.065	18471943	C13H15N1O4S1	13	15	1	4	1
280.08	9292829	C17H15N1O1S1	17	15	1	1	1
280.083	7839777	C13H15N1O6S0	13	15	1	6	0
280.098	71564343	C17H15N1O3S0	17	15	1	3	0
280.101	11533372	C14H19N1O3S1	14	19	1	3	1
280.119	15256662	C14H19N1O5S0	14	19	1	5	0
280.123	5050971	C11H23N1O5S1	11	23	1	5	1
280.134	72244332	C18H19N1O2S0	18	19	1	2	0
280.155	6052491	C15H23N1O4S0	15	23	1	4	0
280.171	50781345	C19H23N1O1S0	19	23	1	1	0
280.192	5851327	C16H27N1O3S0	16	27	1	3	0
280.207	6870230	C20H27N1O0S0	20	27	1	0	0
280.995	8815952	C12H10N0O4S2	12	10	0	4	2
281.013	9061738	C12H10N0O6S1	12	10	0	6	1
281.028	7510400	C16H10N0O3S1	16	10	0	3	1
281.031	8094085	C13H14N0O3S2	13	14	0	3	2
281.046	16885146	C16H10N0O5S0	16	10	0	5	0
281.049	33458591	C13H14N0O5S1	13	14	0	5	1
281.052	8257956	C10H18N0O5S2	10	18	0	5	2
281.057	10958250	C15H10N2O4S0	15	10	2	4	0
281.064	10921397	C17H14N0O2S1	17	14	0	2	1
281.067	8439225	C13H14N0O7S0	13	14	0	7	0
281.07	6373822	C10H18N0O7S1	10	18	0	7	1
281.082	67289551	C17H14N0O4S0	17	14	0	4	0
281.085	27214292	C14H18N0O4S1	14	18	0	4	1
281.093	30472671	C16H14N2O3S0	16	14	2	3	0
281.097	5003237	C21H14N0O1S0	21	14	0	1	0
281.103	23220718	C14H18N0O6S0	14	18	0	6	0
281.106	8007667	C11H22N0O6S1	11	22	0	6	1
281.114	3980542	C13H18N2O5S0	13	18	2	5	0
281.118	118039044	C18H18N0O3S0	18	18	0	3	0
281.122	32797193	C15H22N0O3S1	15	22	0	3	1
281.13	24025620	C17H18N2O2S0	17	18	2	2	0
281.14	69567011	C15H22N0O5S0	15	22	0	5	0
281.155	123314745	C19H22N0O2S0	19	22	0	2	0
281.158	9718334	C16H26N0O2S1	16	26	0	2	1
281.166	10688074	C18H22N2O1S0	18	22	2	1	0
281.176	502973016	C16H26N0O4S0	16	26	0	4	0
281.191	57979502	C20H26N0O1S0	20	26	0	1	0
281.202	4078207	C19H26N2O0S0	19	26	2	0	0
281.212	17420941	C17H30N0O3S0	17	30	0	3	0
281.249	21310146	C18H34N0O2S0	18	34	0	2	0
282.023	11078448	C15H9N1O3S1	15	9	1	3	1
282.041	8947530	C15H9N1O5S0	15	9	1	5	0
282.044	14879567	C12H13N1O5S1	12	13	1	5	1
282.06	22247269	C16H13N1O2S1	16	13	1	2	1
282.077	60266367	C16H13N1O4S0	16	13	1	4	0
282.081	16807812	C13H17N1O4S1	13	17	1	4	1
282.096	9905050	C17H17N1O1S1	17	17	1	1	1
282.098	5612446	C13H17N1O6S0	13	17	1	6	0
282.114	68519861	C17H17N1O3S0	17	17	1	3	0
282.117	11976633	C14H21N1O3S1	14	21	1	3	1
282.129	4675531	C21H17N1O0S0	21	17	1	0	0
282.135	7258580	C14H21N1O5S0	14	21	1	5	0
282.15	50825194	C18H21N1O2S0	18	21	1	2	0
282.186	36263967	C19H25N1O1S0	19	25	1	1	0
282.223	7758933	C20H29N1O0S0	20	29	1	0	0
282.974	3511973	C11H8N0O5S2	11	8	0	5	2
283.007	4923094	C15H8N0O4S1	15	8	0	4	1
283.01	8073946	C12H12N0O4S2	12	12	0	4	2
283.025	5832688	C15H8N0O6S0	15	8	0	6	0
283.028	19131637	C12H12N0O6S1	12	12	0	6	1
283.044	20055307	C16H12N0O3S1	16	12	0	3	1
283.047	5261584	C13H16N0O3S2	13	16	0	3	2
283.061	42315045	C16H12N0O5S0	16	12	0	5	0
283.065	55733546	C13H16N0O5S1	13	16	0	5	1
283.068	14471471	C10H20N0O5S2	10	20	0	5	2
283.072	19574070	C15H12N2O4S0	15	12	2	4	0
283.08	15382849	C17H16N0O2S1	17	16	0	2	1
283.082	9358660	C13H16N0O7S0	13	16	0	7	0
283.098	103722331	C17H16N0O4S0	17	16	0	4	0
283.101	24563040	C14H20N0O4S1	14	20	0	4	1
283.109	32025963	C16H16N2O3S0	16	16	2	3	0
283.113	10803569	C21H16N0O1S0	21	16	0	1	0
283.119	33615226	C14H20N0O6S0	14	20	0	6	0
283.134	153144720	C18H20N0O3S0	18	20	0	3	0
283.137	24274325	C15H24N0O3S1	15	24	0	3	1
283.145	16213409	C17H20N2O2S0	17	20	2	2	0
283.155	66997679	C15H24N0O5S0	15	24	0	5	0
283.17	175459782	C19H24N0O2S0	19	24	0	2	0
283.182	6786006	C18H24N2O1S0	18	24	2	1	0
283.192	72027621	C16H28N0O4S0	16	28	0	4	0
283.207	41180667	C20H28N0O1S0	20	28	0	1	0
283.228	3926555	C17H32N0O3S0	17	32	0	3	0
283.264	78564944	C18H36N0O2S0	18	36	0	2	0
284.002	6762640	C14H7N1O4S1	14	7	1	4	1
284.023	7531183	C11H11N1O6S1	11	11	1	6	1
284.039	24775366	C15H11N1O3S1	15	11	1	3	1
284.056	22536928	C15H11N1O5S0	15	11	1	5	0
284.06	14137061	C12H15N1O5S1	12	15	1	5	1
284.072	4090103	C19H11N1O2S0	19	11	1	2	0
284.075	24496892	C16H15N1O2S1	16	15	1	2	1
284.093	51573526	C16H15N1O4S0	16	15	1	4	0
284.096	14088987	C13H19N1O4S1	13	19	1	4	1
284.108	12946220	C20H15N1O1S0	20	15	1	1	0
284.111	7431985	C17H19N1O1S1	17	19	1	1	1
284.129	53900108	C17H19N1O3S0	17	19	1	3	0
284.133	4730193	C14H23N1O3S1	14	23	1	3	1
284.145	7328098	C21H19N1O0S0	21	19	1	0	0
284.166	47190913	C18H23N1O2S0	18	23	1	2	0
284.202	21119927	C19H27N1O1S0	19	27	1	1	0
284.238	5319661	C20H31N1O0S0	20	31	1	0	0
285.005	4392025	C15H10N0O2S2	15	10	0	2	2
285.007	8774748	C11H10N0O7S1	11	10	0	7	1
285.023	19515507	C15H10N0O4S1	15	10	0	4	1
285.026	4461176	C12H14N0O4S2	12	14	0	4	2
285.04	11491469	C15H10N0O6S0	15	10	0	6	0
285.044	26570898	C12H14N0O6S1	12	14	0	6	1
285.052	8337566	C14H10N2O5S0	14	10	2	5	0
285.059	26953897	C16H14N0O3S1	16	14	0	3	1
285.077	60963011	C16H14N0O5S0	16	14	0	5	0
285.08	230299848	C13H18N0O5S1	13	18	0	5	1
285.088	23412948	C15H14N2O4S0	15	14	2	4	0
285.092	10689753	C20H14N0O2S0	20	14	0	2	0
285.095	18710750	C17H18N0O2S1	17	18	0	2	1
285.098	8961250	C13H18N0O7S0	13	18	0	7	0
285.104	3722730	C19H14N2O1S0	19	14	2	1	0
285.113	114284793	C17H18N0O4S0	17	18	0	4	0
285.117	28885246	C14H22N0O4S1	14	22	0	4	1
285.124	25075977	C16H18N2O3S0	16	18	2	3	0
285.128	18536719	C21H18N0O1S0	21	18	0	1	0
285.134	23949592	C14H22N0O6S0	14	22	0	6	0
285.15	151230766	C18H22N0O3S0	18	22	0	3	0
285.153	17994035	C15H26N0O3S1	15	26	0	3	1
285.161	13561151	C17H22N2O2S0	17	22	2	2	0
285.171	21215566	C15H26N0O5S0	15	26	0	5	0
285.186	171759972	C19H26N0O2S0	19	26	0	2	0
285.207	6216579	C16H30N0O4S0	16	30	0	4	0
285.222	29079962	C20H30N0O1S0	20	30	0	1	0
286.018	17419825	C14H9N1O4S1	14	9	1	4	1
286.036	7554636	C14H9N1O6S0	14	9	1	6	0
286.039	6189137	C11H13N1O6S1	11	13	1	6	1
286.054	33746535	C15H13N1O3S1	15	13	1	3	1
286.072	26336897	C15H13N1O5S0	15	13	1	5	0
286.075	11437702	C12H17N1O5S1	12	17	1	5	1
286.087	10454680	C19H13N1O2S0	19	13	1	2	0
286.091	19781277	C16H17N1O2S1	16	17	1	2	1
286.108	54169271	C16H17N1O4S0	16	17	1	4	0
286.112	10037948	C13H21N1O4S1	13	21	1	4	1
286.124	16754382	C20H17N1O1S0	20	17	1	1	0
286.127	4825810	C17H21N1O1S1	17	21	1	1	1
286.145	34221805	C17H21N1O3S0	17	21	1	3	0
286.148	5614322	C14H25N1O3S1	14	25	1	3	1
286.16	8578819	C21H21N1O0S0	21	21	1	0	0
286.181	36867874	C18H25N1O2S0	18	25	1	2	0
286.218	8074072	C19H29N1O1S0	19	29	1	1	0
287.002	4317150	C14H8N0O5S1	14	8	0	5	1
287.005	4597731	C11H12N0O5S2	11	12	0	5	2
287.021	5433849	C15H12N0O2S2	15	12	0	2	2
287.023	6873597	C11H12N0O7S1	11	12	0	7	1
287.038	25527316	C15H12N0O4S1	15	12	0	4	1
287.042	5853209	C12H16N0O4S2	12	16	0	4	2
287.056	22281262	C15H12N0O6S0	15	12	0	6	0
287.059	37110835	C12H16N0O6S1	12	16	0	6	1
287.067	11775038	C14H12N2O5S0	14	12	2	5	0
287.071	11066436	C19H12N0O3S0	19	12	0	3	0
287.075	20972617	C16H16N0O3S1	16	16	0	3	1
287.083	4288085	C18H12N2O2S0	18	12	2	2	0
287.092	66724963	C16H16N0O5S0	16	16	0	5	0
287.096	21382248	C13H20N0O5S1	13	20	0	5	1
287.104	21783668	C15H16N2O4S0	15	16	2	4	0
287.108	29197434	C20H16N0O2S0	20	16	0	2	0
287.111	13065343	C17H20N0O2S1	17	20	0	2	1
287.119	8488075	C19H16N2O1S0	19	16	2	1	0
287.129	171173017	C17H20N0O4S0	17	20	0	4	0
287.132	18465950	C14H24N0O4S1	14	24	0	4	1
287.14	10762410	C16H20N2O3S0	16	20	2	3	0
287.144	26227888	C21H20N0O1S0	21	20	0	1	0
287.15	6414520	C14H24N0O6S0	14	24	0	6	0
287.165	154100943	C18H24N0O3S0	18	24	0	3	0
287.169	12529876	C15H28N0O3S1	15	28	0	3	1
287.176	6167007	C17H24N2O2S0	17	24	2	2	0
287.202	79234308	C19H28N0O2S0	19	28	0	2	0
287.238	22893882	C20H32N0O1S0	20	32	0	1	0
288.034	21789134	C14H11N1O4S1	14	11	1	4	1
288.051	8436200	C14H11N1O6S0	14	11	1	6	0
288.055	8841709	C11H15N1O6S1	11	15	1	6	1
288.067	8074750	C18H11N1O3S0	18	11	1	3	0
288.07	26280451	C15H15N1O3S1	15	15	1	3	1
288.088	29194781	C15H15N1O5S0	15	15	1	5	0
288.091	11412002	C12H19N1O5S1	12	19	1	5	1
288.103	31660596	C19H15N1O2S0	19	15	1	2	0
288.106	11188793	C16H19N1O2S1	16	19	1	2	1
288.124	31240787	C16H19N1O4S0	16	19	1	4	0
288.127	16464472	C13H23N1O4S1	13	23	1	4	1
288.139	34364009	C20H19N1O1S0	20	19	1	1	0
288.161	25520776	C17H23N1O3S0	17	23	1	3	0
288.176	12484255	C21H23N1O0S0	21	23	1	0	0
288.197	20796094	C18H27N1O2S0	18	27	1	2	0
288.233	4242675	C19H31N1O1S0	19	31	1	1	0
289	7801689	C14H10N0O3S2	14	10	0	3	2
289.018	14664563	C14H10N0O5S1	14	10	0	5	1
289.021	4240760	C11H14N0O5S2	11	14	0	5	2
289.035	7847821	C14H10N0O7S0	14	10	0	7	0
289.039	6081682	C11H14N0O7S1	11	14	0	7	1
289.051	4029859	C18H10N0O4S0	18	10	0	4	0
289.054	29745064	C15H14N0O4S1	15	14	0	4	1
289.062	4539827	C17H10N2O3S0	17	10	2	3	0
289.072	35229634	C15H14N0O6S0	15	14	0	6	0
289.075	17502151	C12H18N0O6S1	12	18	0	6	1
289.083	11096019	C14H14N2O5S0	14	14	2	5	0
289.087	29814744	C19H14N0O3S0	19	14	0	3	0
289.09	21090269	C16H18N0O3S1	16	18	0	3	1
289.098	15736809	C18H14N2O2S0	18	14	2	2	0
289.108	78589943	C16H18N0O5S0	16	18	0	5	0
289.111	37793788	C13H22N0O5S1	13	22	0	5	1
289.119	11388936	C15H18N2O4S0	15	18	2	4	0
289.123	36528142	C20H18N0O2S0	20	18	0	2	0
289.127	9243667	C17H22N0O2S1	17	22	0	2	1
289.135	10403870	C19H18N2O1S0	19	18	2	1	0
289.145	146501677	C17H22N0O4S0	17	22	0	4	0
289.148	11552817	C14H26N0O4S1	14	26	0	4	1
289.156	5585469	C16H22N2O3S0	16	22	2	3	0
289.16	35676227	C21H22N0O1S0	21	22	0	1	0
289.181	171929698	C18H26N0O3S0	18	26	0	3	0
289.217	47362199	C19H30N0O2S0	19	30	0	2	0
289.254	9694413	C20H34N0O1S0	20	34	0	1	0
290.013	7390498	C13H9N1O5S1	13	9	1	5	1
290.046	5967698	C17H9N1O4S0	17	9	1	4	0
290.049	31219031	C14H13N1O4S1	14	13	1	4	1
290.067	12086640	C14H13N1O6S0	14	13	1	6	0
290.07	6101878	C11H17N1O6S1	11	17	1	6	1
290.082	26508679	C18H13N1O3S0	18	13	1	3	0
290.086	23330188	C15H17N1O3S1	15	17	1	3	1
290.103	24677798	C15H17N1O5S0	15	17	1	5	0
290.107	11219371	C12H21N1O5S1	12	21	1	5	1
290.119	40932796	C19H17N1O2S0	19	17	1	2	0
290.122	5843905	C16H21N1O2S1	16	21	1	2	1
290.14	21251547	C16H21N1O4S0	16	21	1	4	0
290.143	4361695	C13H25N1O4S1	13	25	1	4	1
290.155	43247089	C20H21N1O1S0	20	21	1	1	0
290.176	21806608	C17H25N1O3S0	17	25	1	3	0
290.191	13026854	C21H25N1O0S0	21	25	1	0	0
290.979	8535710	C13H8N0O4S2	13	8	0	4	2
290.997	5922488	C13H8N0O6S1	13	8	0	6	1
291.016	12095187	C14H12N0O3S2	14	12	0	3	2
291.033	24900333	C14H12N0O5S1	14	12	0	5	1
291.037	4901617	C11H16N0O5S2	11	16	0	5	2
291.051	24687366	C14H12N0O7S0	14	12	0	7	0
291.054	8613643	C11H16N0O7S1	11	16	0	7	1
291.066	20558620	C18H12N0O4S0	18	12	0	4	0
291.07	30208801	C15H16N0O4S1	15	16	0	4	1
291.077	15615789	C17H12N2O3S0	17	12	2	3	0
291.087	46533435	C15H16N0O6S0	15	16	0	6	0
291.091	28375872	C12H20N0O6S1	12	20	0	6	1
291.099	8177995	C14H16N2O5S0	14	16	2	5	0
291.103	53422929	C19H16N0O3S0	19	16	0	3	0
291.106	20433750	C16H20N0O3S1	16	20	0	3	1
291.114	18221921	C18H16N2O2S0	18	16	2	2	0
291.124	118520688	C16H20N0O5S0	16	20	0	5	0
291.127	34708341	C13H24N0O5S1	13	24	0	5	1
291.135	6842240	C15H20N2O4S0	15	20	2	4	0
291.139	69671814	C20H20N0O2S0	20	20	0	2	0
291.142	7656843	C17H24N0O2S1	17	24	0	2	1
291.15	12243862	C19H20N2O1S0	19	20	2	1	0
291.16	237337508	C17H24N0O4S0	17	24	0	4	0
291.164	4731305	C14H28N0O4S1	14	28	0	4	1
291.175	39582651	C21H24N0O1S0	21	24	0	1	0
291.197	157580249	C18H28N0O3S0	18	28	0	3	0
291.233	31341582	C19H32N0O2S0	19	32	0	2	0
292.029	9814153	C13H11N1O5S1	13	11	1	5	1
292.044	5916063	C17H11N1O2S1	17	11	1	2	1
292.061	16998584	C17H11N1O4S0	17	11	1	4	0
292.065	21838013	C14H15N1O4S1	14	15	1	4	1
292.08	5955795	C18H15N1O1S1	18	15	1	1	1
292.083	22540503	C14H15N1O6S0	14	15	1	6	0
292.086	9638107	C11H19N1O6S1	11	19	1	6	1
292.098	73556205	C18H15N1O3S0	18	15	1	3	0
292.101	14901489	C15H19N1O3S1	15	19	1	3	1
292.119	17615115	C15H19N1O5S0	15	19	1	5	0
292.122	7411984	C12H23N1O5S1	12	23	1	5	1
292.134	69214497	C19H19N1O2S0	19	19	1	2	0
292.138	3534118	C16H23N1O2S1	16	23	1	2	1
292.155	10504511	C16H23N1O4S0	16	23	1	4	0
292.171	40685909	C20H23N1O1S0	20	23	1	1	0
292.192	17586547	C17H27N1O3S0	17	27	1	3	0
292.207	8070025	C21H27N1O0S0	21	27	1	0	0
292.228	3537320	C18H31N1O2S0	18	31	1	2	0
292.995	11452912	C13H10N0O4S2	13	10	0	4	2
293.013	11531785	C13H10N0O6S1	13	10	0	6	1
293.028	5239839	C17H10N0O3S1	17	10	0	3	1
293.031	7581731	C14H14N0O3S2	14	14	0	3	2
293.046	9743928	C17H10N0O5S0	17	10	0	5	0
293.049	29980221	C14H14N0O5S1	14	14	0	5	1
293.052	6097986	C11H18N0O5S2	11	18	0	5	2
293.057	6050376	C16H10N2O4S0	16	10	2	4	0
293.064	7504979	C18H14N0O2S1	18	14	0	2	1
293.067	21225046	C14H14N0O7S0	14	14	0	7	0
293.07	10667611	C11H18N0O7S1	11	18	0	7	1
293.078	3866470	C13H14N2O6S0	13	14	2	6	0
293.082	51152492	C18H14N0O4S0	18	14	0	4	0
293.085	26183281	C15H18N0O4S1	15	18	0	4	1
293.093	22595196	C17H14N2O3S0	17	14	2	3	0
293.103	41625226	C15H18N0O6S0	15	18	0	6	0
293.106	15201935	C12H22N0O6S1	12	22	0	6	1
293.114	4101786	C14H18N2O5S0	14	18	2	5	0
293.118	88032928	C19H18N0O3S0	19	18	0	3	0
293.122	25648804	C16H22N0O3S1	16	22	0	3	1
293.13	25480880	C18H18N2O2S0	18	18	2	2	0
293.139	73320126	C16H22N0O5S0	16	22	0	5	0
293.143	5379779	C13H26N0O5S1	13	26	0	5	1
293.155	99600083	C20H22N0O2S0	20	22	0	2	0
293.158	7138520	C17H26N0O2S1	17	26	0	2	1
293.166	11733731	C19H22N2O1S0	19	22	2	1	0
293.176	484050673	C17H26N0O4S0	17	26	0	4	0
293.179	30637814	C14H30N0O4S1	14	30	0	4	1
293.191	43849479	C21H26N0O1S0	21	26	0	1	0
293.212	61978405	C18H30N0O3S0	18	30	0	3	0
293.249	9012057	C19H34N0O2S0	19	34	0	2	0
294.023	6360481	C16H9N1O3S1	16	9	1	3	1
294.041	10522554	C16H9N1O5S0	16	9	1	5	0
294.044	18439103	C13H13N1O5S1	13	13	1	5	1
294.059	13982676	C17H13N1O2S1	17	13	1	2	1
294.077	38509549	C17H13N1O4S0	17	13	1	4	0
294.081	20728818	C14H17N1O4S1	14	17	1	4	1
294.096	7500808	C18H17N1O1S1	18	17	1	1	1
294.098	9262091	C14H17N1O6S0	14	17	1	6	0
294.114	66300961	C18H17N1O3S0	18	17	1	3	0
294.117	7362598	C15H21N1O3S1	15	21	1	3	1
294.135	17404991	C15H21N1O5S0	15	21	1	5	0
294.138	9266243	C12H25N1O5S1	12	25	1	5	1
294.15	73501780	C19H21N1O2S0	19	21	1	2	0
294.171	6001778	C16H25N1O4S0	16	25	1	4	0
294.186	43314311	C20H25N1O1S0	20	25	1	1	0
294.208	3898533	C17H29N1O3S0	17	29	1	3	0
[truncated: 1,910 more rows]

## Sheet: RWDOM-(+)ESI
m/z	intensity	Formula	C	H	N	O	S
115.021	1199553	C5H4N0O1S1	5	4	0	1	1
117.055	3943875	C5H6N0O3S0	5	6	0	3	0
117.07	1020477	C9H6N0O0S0	9	6	0	0	0
121.065	1248321	C8H6N0O1S0	8	6	0	1	0
121.101	1276414	C9H10N0O0S0	9	10	0	0	0
123.08	1122941	C8H8N0O1S0	8	8	0	1	0
123.117	1925708	C9H12N0O0S0	9	12	0	0	0
124.112	1516822	C8H11N1O0S0	8	11	1	0	0
125.042	1082937	C7H6N0O0S1	7	6	0	0	1
125.06	1263730	C7H6N0O2S0	7	6	0	2	0
125.096	1212986	C8H10N0O1S0	8	10	0	1	0
126.091	1598832	C7H9N1O1S0	7	9	1	1	0
126.128	1327388	C8H13N1O0S0	8	13	1	0	0
127.123	1030975	C7H12N2O0S0	7	12	2	0	0
128.071	1177745	C6H7N1O2S0	6	7	1	2	0
128.107	1990569	C7H11N1O1S0	7	11	1	1	0
128.143	18418065	C8H15N1O0S0	8	15	1	0	0
129.091	1100110	C7H10N0O2S0	7	10	0	2	0
131.07	5050338	C6H8N0O3S0	6	8	0	3	0
131.086	1014096	C10H8N0O0S0	10	8	0	0	0
132.084	1010744	C6H11N1O0S1	6	11	1	0	1
133.076	1118780	C8H6N2O0S0	8	6	2	0	0
133.101	1466699	C10H10N0O0S0	10	10	0	0	0
135.08	2132843	C9H8N0O1S0	9	8	0	1	0
135.117	1925686	C10H12N0O0S0	10	12	0	0	0
136.041	1146699	C7H3N1O2S0	7	3	1	2	0
136.076	1308511	C8H7N1O1S0	8	7	1	1	0
136.112	1913395	C9H11N1O0S0	9	11	1	0	0
137.096	1562436	C9H10N0O1S0	9	10	0	1	0
137.133	1022738	C10H14N0O0S0	10	14	0	0	0
138.091	1889526	C8H9N1O1S0	8	9	1	1	0
138.128	2534743	C9H13N1O0S0	9	13	1	0	0
139.054	1155816	C11H4N0O0S0	11	4	0	0	0
139.058	4572820	C8H8N0O0S1	8	8	0	0	1
139.075	1395012	C8H8N0O2S0	8	8	0	2	0
140.107	2327765	C8H11N1O1S0	8	11	1	1	0
140.143	10428090	C9H15N1O0S0	9	15	1	0	0
141.073	1167350	C8H10N0O0S1	8	10	0	0	1
141.091	1103089	C8H10N0O2S0	8	10	0	2	0
141.139	5291451	C8H14N2O0S0	8	14	2	0	0
142.123	5093342	C8H13N1O1S0	8	13	1	1	0
142.159	61121414	C9H17N1O0S0	9	17	1	0	0
143.064	1199034	C6H8N2O0S1	6	8	2	0	1
143.07	1348114	C7H8N0O3S0	7	8	0	3	0
144.011	1197043	C5H3N1O2S1	5	3	1	2	1
144.084	2113785	C7H11N1O0S1	7	11	1	0	1
144.102	1293230	C7H11N1O2S0	7	11	1	2	0
145.039	1082640	C8H2N2O1S0	8	2	2	1	0
145.065	1282063	C10H6N0O1S0	10	6	0	1	0
145.086	71591113	C7H10N0O3S0	7	10	0	3	0
145.101	3116635	C11H10N0O0S0	11	10	0	0	0
146.096	1345671	C10H9N1O0S0	10	9	1	0	0
147.047	8004187	C6H8N0O2S1	6	8	0	2	1
147.08	2644357	C10H8N0O1S0	10	8	0	1	0
147.092	1802771	C9H8N2O0S0	9	8	2	0	0
147.117	3236596	C11H12N0O0S0	11	12	0	0	0
148.112	1474142	C10H11N1O0S0	10	11	1	0	0
149.023	5201012	C8H2N0O3S0	8	2	0	3	0
149.06	1798500	C9H6N0O2S0	9	6	0	2	0
149.071	1256275	C8H6N2O1S0	8	6	2	1	0
149.096	4012373	C10H10N0O1S0	10	10	0	1	0
149.107	1389028	C9H10N2O0S0	9	10	2	0	0
149.132	3498246	C11H14N0O0S0	11	14	0	0	0
150.091	4970770	C9H9N1O1S0	9	9	1	1	0
150.128	10111556	C10H13N1O0S0	10	13	1	0	0
151.075	2587798	C9H8N0O2S0	9	8	0	2	0
151.112	3103624	C10H12N0O1S0	10	12	0	1	0
151.123	1454616	C9H12N2O0S0	9	12	2	0	0
151.148	1250266	C11H16N0O0S0	11	16	0	0	0
152.071	3049147	C8H7N1O2S0	8	7	1	2	0
152.107	8242670	C9H11N1O1S0	9	11	1	1	0
152.143	14382881	C10H15N1O0S0	10	15	1	0	0
153	1131780	C7H2N0O2S1	7	2	0	2	1
153.055	1463905	C8H6N0O3S0	8	6	0	3	0
153.066	1154226	C7H6N2O2S0	7	6	2	2	0
153.073	8523835	C9H10N0O0S1	9	10	0	0	1
153.091	2604052	C9H10N0O2S0	9	10	0	2	0
153.102	1091924	C8H10N2O1S0	8	10	2	1	0
153.127	2219656	C10H14N0O1S0	10	14	0	1	0
153.139	1541527	C9H14N2O0S0	9	14	2	0	0
154.068	2256958	C8H9N1O0S1	8	9	1	0	1
154.086	2477911	C8H9N1O2S0	8	9	1	2	0
154.123	10621707	C9H13N1O1S0	9	13	1	1	0
154.159	194782271	C10H17N1O0S0	10	17	1	0	0
155.053	1678523	C8H8N0O1S1	8	8	0	1	1
155.07	4498772	C8H8N0O3S0	8	8	0	3	0
155.086	1986410	C12H8N0O0S0	12	8	0	0	0
155.089	2167663	C9H12N0O0S1	9	12	0	0	1
155.107	1372712	C9H12N0O2S0	9	12	0	2	0
155.117	1171847	C8H12N2O1S0	8	12	2	1	0
155.154	14924748	C9H16N2O0S0	9	16	2	0	0
156.048	1389903	C7H7N1O1S1	7	7	1	1	1
156.102	2865309	C8H11N1O2S0	8	11	1	2	0
156.138	7613266	C9H15N1O1S0	9	15	1	1	0
156.175	67776390	C10H19N1O0S0	10	19	1	0	0
157.043	1157161	C6H6N2O1S1	6	6	2	1	1
157.05	1655154	C7H6N0O4S0	7	6	0	4	0
157.068	2804749	C8H10N0O1S1	8	10	0	1	1
157.079	1504541	C7H10N2O0S1	7	10	2	0	1
157.086	1810023	C8H10N0O3S0	8	10	0	3	0
157.101	4609853	C12H10N0O0S0	12	10	0	0	0
157.105	3137858	C9H14N0O0S1	9	14	0	0	1
158.063	1218025	C7H9N1O1S1	7	9	1	1	1
158.081	1111362	C7H9N1O3S0	7	9	1	3	0
158.1	3839709	C8H13N1O0S1	8	13	1	0	1
158.118	2486391	C8H13N1O2S0	8	13	1	2	0
159.08	3459299	C11H8N0O1S0	11	8	0	1	0
159.084	1670056	C8H12N0O1S1	8	12	0	1	1
159.092	1300275	C10H8N2O0S0	10	8	2	0	0
159.117	6656280	C12H12N0O0S0	12	12	0	0	0
160.076	2018107	C10H7N1O1S0	10	7	1	1	0
160.079	2960768	C7H11N1O1S1	7	11	1	1	1
160.112	4006959	C11H11N1O0S0	11	11	1	0	0
160.115	1976052	C8H15N1O0S1	8	15	1	0	1
161.016	1147422	C8H2N2O0S1	8	2	2	0	1
161.06	2451068	C10H6N0O2S0	10	6	0	2	0
161.096	6454576	C11H10N0O1S0	11	10	0	1	0
161.099	1257653	C8H14N0O1S1	8	14	0	1	1
161.107	6158912	C10H10N2O0S0	10	10	2	0	0
161.132	7244900	C12H14N0O0S0	12	14	0	0	0
162.033	1122070	C12H1N1O0S0	12	1	1	0	0
162.058	1455305	C6H9N1O2S1	6	9	1	2	1
162.091	6312376	C10H9N1O1S0	10	9	1	1	0
162.128	14051052	C11H13N1O0S0	11	13	1	0	0
163.075	3860133	C10H8N0O2S0	10	8	0	2	0
163.087	2225845	C9H8N2O1S0	9	8	2	1	0
163.112	5370200	C11H12N0O1S0	11	12	0	1	0
163.123	1129768	C10H12N2O0S0	10	12	2	0	0
163.148	5329547	C12H16N0O0S0	12	16	0	0	0
164.053	1799290	C9H7N1O0S1	9	7	1	0	1
164.071	2606099	C9H7N1O2S0	9	7	1	2	0
164.107	12515269	C10H11N1O1S0	10	11	1	1	0
164.143	12309496	C11H15N1O0S0	11	15	1	0	0
165.073	1231706	C10H10N0O0S1	10	10	0	0	1
165.091	4029714	C10H10N0O2S0	10	10	0	2	0
165.102	1415777	C9H10N2O1S0	9	10	2	1	0
165.127	2451908	C11H14N0O1S0	11	14	0	1	0
165.139	2089427	C10H14N2O0S0	10	14	2	0	0
166.05	1292009	C8H5N1O3S0	8	5	1	3	0
166.068	1613698	C9H9N1O0S1	9	9	1	0	1
166.086	5555034	C9H9N1O2S0	9	9	1	2	0
166.123	14080139	C10H13N1O1S0	10	13	1	1	0
166.159	50798268	C11H17N1O0S0	11	17	1	0	0
167.034	1170892	C8H4N0O4S0	8	4	0	4	0
167.07	3754621	C9H8N0O3S0	9	8	0	3	0
167.082	1465356	C8H8N2O2S0	8	8	2	2	0
167.086	1509329	C13H8N0O0S0	13	8	0	0	0
167.089	5625493	C10H12N0O0S1	10	12	0	0	1
167.107	4728749	C10H12N0O2S0	10	12	0	2	0
167.118	3453116	C9H12N2O1S0	9	12	2	1	0
167.143	1434845	C11H16N0O1S0	11	16	0	1	0
167.154	2389996	C10H16N2O0S0	10	16	2	0	0
168.066	1940757	C8H7N1O3S0	8	7	1	3	0
168.084	13531821	C9H11N1O0S1	9	11	1	0	1
168.102	5394884	C9H11N1O2S0	9	11	1	2	0
168.138	16372979	C10H15N1O1S0	10	15	1	1	0
168.175	425128226	C11H19N1O0S0	11	19	1	0	0
169.032	1245804	C8H6N0O2S1	8	6	0	2	1
169.04	1146038	C10H2N2O1S0	10	2	2	1	0
169.068	2484634	C9H10N0O1S1	9	10	0	1	1
169.079	2658088	C8H10N2O0S1	8	10	2	0	1
169.086	2267696	C9H10N0O3S0	9	10	0	3	0
169.097	2169022	C8H10N2O2S0	8	10	2	2	0
169.101	3410628	C13H10N0O0S0	13	10	0	0	0
169.122	1594014	C10H14N0O2S0	10	14	0	2	0
169.17	4421146	C10H18N2O0S0	10	18	2	0	0
170.063	2810870	C8H9N1O1S1	8	9	1	1	1
170.081	1929228	C8H9N1O3S0	8	9	1	3	0
170.096	1412063	C12H9N1O0S0	12	9	1	0	0
170.1	11533475	C9H13N1O0S1	9	13	1	0	1
170.118	12028601	C9H13N1O2S0	9	13	1	2	0
170.154	9244390	C10H17N1O1S0	10	17	1	1	0
170.19	33211155	C11H21N1O0S0	11	21	1	0	0
171.047	1892773	C8H8N0O2S1	8	8	0	2	1
171.059	2403634	C7H8N2O1S1	7	8	2	1	1
171.08	1378381	C12H8N0O1S0	12	8	0	1	0
171.084	4750929	C9H12N0O1S1	9	12	0	1	1
171.095	2138974	C8H12N2O0S1	8	12	2	0	1
171.113	7224179	C8H12N2O2S0	8	12	2	2	0
171.117	6690168	C13H12N0O0S0	13	12	0	0	0
171.149	1546079	C9H16N2O1S0	9	16	2	1	0
172.076	1235112	C11H7N1O1S0	11	7	1	1	0
172.079	1177452	C8H11N1O1S1	8	11	1	1	1
172.097	2054017	C8H11N1O3S0	8	11	1	3	0
172.112	5196819	C12H11N1O0S0	12	11	1	0	0
172.115	5427991	C9H15N1O0S1	9	15	1	0	1
172.133	2419499	C9H15N1O2S0	9	15	1	2	0
173.06	1789015	C11H6N0O2S0	11	6	0	2	0
173.063	1801435	C8H10N0O2S1	8	10	0	2	1
173.092	1437564	C7H10N2O3S0	7	10	2	3	0
173.096	5644928	C12H10N0O1S0	12	10	0	1	0
173.099	2042756	C9H14N0O1S1	9	14	0	1	1
173.107	3654541	C11H10N2O0S0	11	10	2	0	0
173.132	8531114	C13H14N0O0S0	13	14	0	0	0
173.165	2150094	C9H18N2O1S0	9	18	2	1	0
174.058	1280439	C7H9N1O2S1	7	9	1	2	1
174.091	5386204	C11H9N1O1S0	11	9	1	1	0
174.095	1892191	C8H13N1O1S1	8	13	1	1	1
174.111	1231282	C8H13N1O3S0	8	13	1	3	0
174.128	17712388	C12H13N1O0S0	12	13	1	0	0
174.131	8228104	C9H17N1O0S1	9	17	1	0	1
175.075	4033036	C11H8N0O2S0	11	8	0	2	0
175.079	4498703	C8H12N0O2S1	8	12	0	2	1
175.087	2000152	C10H8N2O1S0	10	8	2	1	0
175.112	8720691	C12H12N0O1S0	12	12	0	1	0
175.123	7403327	C11H12N2O0S0	11	12	2	0	0
175.148	5797210	C13H16N0O0S0	13	16	0	0	0
176.071	4055593	C10H7N1O2S0	10	7	1	2	0
176.107	11746126	C11H11N1O1S0	11	11	1	1	0
176.143	27522420	C12H15N1O0S0	12	15	1	0	0
177.035	1344583	C13H2N0O1S0	13	2	0	1	0
177.055	1597723	C10H6N0O3S0	10	6	0	3	0
177.066	1317991	C9H6N2O2S0	9	6	2	2	0
177.073	1450350	C11H10N0O0S1	11	10	0	0	1
177.091	4825920	C11H10N0O2S0	11	10	0	2	0
177.102	2679243	C10H10N2O1S0	10	10	2	1	0
177.127	5580389	C12H14N0O1S0	12	14	0	1	0
177.139	2328560	C11H14N2O0S0	11	14	2	0	0
177.164	4856969	C13H18N0O0S0	13	18	0	0	0
178.032	1232649	C9H5N1O1S1	9	5	1	1	1
178.068	3410701	C10H9N1O0S1	10	9	1	0	1
178.086	8744222	C10H9N1O2S0	10	9	1	2	0
178.123	22862146	C11H13N1O1S0	11	13	1	1	0
178.159	25009510	C12H17N1O0S0	12	17	1	0	0
179.053	1696707	C10H8N0O1S1	10	8	0	1	1
179.07	2930132	C10H8N0O3S0	10	8	0	3	0
179.082	1785182	C9H8N2O2S0	9	8	2	2	0
179.089	2244069	C11H12N0O0S1	11	12	0	0	1
179.107	5153782	C11H12N0O2S0	11	12	0	2	0
179.118	2342145	C10H12N2O1S0	10	12	2	1	0
179.143	3484697	C12H16N0O1S0	12	16	0	1	0
179.154	3207715	C11H16N2O0S0	11	16	2	0	0
180.048	2926821	C9H7N1O1S1	9	7	1	1	1
180.066	2175990	C9H7N1O3S0	9	7	1	3	0
180.084	9934983	C10H11N1O0S1	10	11	1	0	1
180.102	12474519	C10H11N1O2S0	10	11	1	2	0
180.138	26342585	C11H15N1O1S0	11	15	1	1	0
180.175	106398938	C12H19N1O0S0	12	19	1	0	0
181.043	1429994	C8H6N2O1S1	8	6	2	1	1
181.061	1676281	C8H6N2O3S0	8	6	2	3	0
181.068	2226688	C10H10N0O1S1	10	10	0	1	1
181.079	1300810	C9H10N2O0S1	9	10	2	0	1
181.086	3553296	C10H10N0O3S0	10	10	0	3	0
181.088	1282769	C7H14N0O3S1	7	14	0	3	1
181.097	3636506	C9H10N2O2S0	9	10	2	2	0
181.101	2513053	C14H10N0O0S0	14	10	0	0	0
181.105	2524064	C11H14N0O0S1	11	14	0	0	1
181.122	5800496	C11H14N0O2S0	11	14	0	2	0
181.134	2905402	C10H14N2O1S0	10	14	2	1	0
181.159	1194064	C12H18N0O1S0	12	18	0	1	0
181.17	2179418	C11H18N2O0S0	11	18	2	0	0
182.063	4485222	C9H9N1O1S1	9	9	1	1	1
182.081	5423989	C9H9N1O3S0	9	9	1	3	0
182.1	81132421	C10H13N1O0S1	10	13	1	0	1
182.118	10569620	C10H13N1O2S0	10	13	1	2	0
182.154	36035507	C11H17N1O1S0	11	17	1	1	0
182.19	326298578	C12H21N1O0S0	12	21	1	0	0
183.047	2269348	C9H8N0O2S1	9	8	0	2	1
183.059	1674414	C8H8N2O1S1	8	8	2	1	1
183.065	1442867	C9H8N0O4S0	9	8	0	4	0
183.076	1494460	C8H8N2O3S0	8	8	2	3	0
183.08	2727360	C13H8N0O1S0	13	8	0	1	0
183.084	3068866	C10H12N0O1S1	10	12	0	1	1
183.092	1966537	C12H8N2O0S0	12	8	2	0	0
183.095	1554892	C9H12N2O0S1	9	12	2	0	1
183.102	2620241	C10H12N0O3S0	10	12	0	3	0
183.113	1803994	C9H12N2O2S0	9	12	2	2	0
183.117	6153950	C14H12N0O0S0	14	12	0	0	0
183.138	1627887	C11H16N0O2S0	11	16	0	2	0
183.149	5517561	C10H16N2O1S0	10	16	2	1	0
183.186	2235671	C11H20N2O0S0	11	20	2	0	0
184.043	1446223	C8H7N1O2S1	8	7	1	2	1
184.076	1247721	C12H7N1O1S0	12	7	1	1	0
184.079	1936748	C9H11N1O1S1	9	11	1	1	1
184.096	3679993	C9H11N1O3S0	9	11	1	3	0
184.112	2831878	C13H11N1O0S0	13	11	1	0	0
184.115	15740425	C10H15N1O0S1	10	15	1	0	1
184.133	15033879	C10H15N1O2S0	10	15	1	2	0
184.17	12560948	C11H19N1O1S0	11	19	1	1	0
184.206	12110417	C12H23N1O0S0	12	23	1	0	0
185.063	3279600	C9H10N0O2S1	9	10	0	2	1
185.074	4372984	C8H10N2O1S1	8	10	2	1	1
185.081	1921022	C9H10N0O4S0	9	10	0	4	0
185.092	1504774	C8H10N2O3S0	8	10	2	3	0
185.096	5188617	C13H10N0O1S0	13	10	0	1	0
185.099	2264460	C10H14N0O1S1	10	14	0	1	1
185.111	3661076	C9H14N2O0S1	9	14	2	0	1
185.132	9371941	C14H14N0O0S0	14	14	0	0	0
185.165	3085246	C10H18N2O1S0	10	18	2	1	0
186.058	1584479	C8H9N1O2S1	8	9	1	2	1
186.091	3019768	C12H9N1O1S0	12	9	1	1	0
186.095	1872122	C9H13N1O1S1	9	13	1	1	1
186.112	3593480	C9H13N1O3S0	9	13	1	3	0
186.128	6606355	C13H13N1O0S0	13	13	1	0	0
186.131	1610773	C10H17N1O0S1	10	17	1	0	1
186.149	5885474	C10H17N1O2S0	10	17	1	2	0
187.075	3924930	C12H8N0O2S0	12	8	0	2	0
187.079	7157444	C9H12N0O2S1	9	12	0	2	1
187.108	1340249	C8H12N2O3S0	8	12	2	3	0
187.112	7752924	C13H12N0O1S0	13	12	0	1	0
187.123	3383267	C12H12N2O0S0	12	12	2	0	0
187.126	2674918	C9H16N2O0S1	9	16	2	0	1
187.148	9978613	C14H16N0O0S0	14	16	0	0	0
187.18	3042828	C10H20N2O1S0	10	20	2	1	0
188.071	2968183	C11H7N1O2S0	11	7	1	2	0
188.074	2188665	C8H11N1O2S1	8	11	1	2	1
188.107	12034448	C12H11N1O1S0	12	11	1	1	0
188.11	3361938	C9H15N1O1S1	9	15	1	1	1
188.143	55868841	C13H15N1O0S0	13	15	1	0	0
188.147	7230891	C10H19N1O0S1	10	19	1	0	1
189.055	1574153	C11H6N0O3S0	11	6	0	3	0
189.058	1317003	C8H10N0O3S1	8	10	0	3	1
189.066	1808144	C10H6N2O2S0	10	6	2	2	0
189.069	1476114	C7H10N2O2S1	7	10	2	2	1
189.091	7625760	C12H10N0O2S0	12	10	0	2	0
189.094	17536035	C9H14N0O2S1	9	14	0	2	1
189.102	3432744	C11H10N2O1S0	11	10	2	1	0
189.127	9521720	C13H14N0O1S0	13	14	0	1	0
189.139	7383104	C12H14N2O0S0	12	14	2	0	0
189.164	6716496	C14H18N0O0S0	14	18	0	0	0
190.072	1436307	C8H13N1O0S2	8	13	1	0	2
190.086	6753948	C11H9N1O2S0	11	9	1	2	0
190.09	1401119	C8H13N1O2S1	8	13	1	2	1
190.123	21272243	C12H13N1O1S0	12	13	1	1	0
190.159	38275786	C13H17N1O0S0	13	17	1	0	0
191.07	4351222	C11H8N0O3S0	11	8	0	3	0
191.074	1544760	C8H12N0O3S1	8	12	0	3	1
191.081	4879356	C10H8N2O2S0	10	8	2	2	0
191.107	8870667	C12H12N0O2S0	12	12	0	2	0
191.118	4286994	C11H12N2O1S0	11	12	2	1	0
191.143	6772001	C13H16N0O1S0	13	16	0	1	0
191.154	2242344	C12H16N2O0S0	12	16	2	0	0
191.179	3160119	C14H20N0O0S0	14	20	0	0	0
192.048	1865776	C10H7N1O1S1	10	7	1	1	1
192.066	2057658	C10H7N1O3S0	10	7	1	3	0
192.084	6347589	C11H11N1O0S1	11	11	1	0	1
192.087	1283783	C8H15N1O0S2	8	15	1	0	2
192.102	15670095	C11H11N1O2S0	11	11	1	2	0
192.138	45930340	C12H15N1O1S0	12	15	1	1	0
192.175	66201464	C13H19N1O0S0	13	19	1	0	0
193.032	1651155	C10H6N0O2S1	10	6	0	2	1
193.05	1634269	C10H6N0O4S0	10	6	0	4	0
193.068	2012135	C11H10N0O1S1	11	10	0	1	1
193.079	1279213	C10H10N2O0S1	10	10	2	0	1
193.086	4981617	C11H10N0O3S0	11	10	0	3	0
193.097	3568247	C10H10N2O2S0	10	10	2	2	0
193.101	2483577	C15H10N0O0S0	15	10	0	0	0
193.105	2612475	C12H14N0O0S1	12	14	0	0	1
193.122	8782212	C12H14N0O2S0	12	14	0	2	0
193.134	2947466	C11H14N2O1S0	11	14	2	1	0
193.159	3152024	C13H18N0O1S0	13	18	0	1	0
193.17	3427998	C12H18N2O0S0	12	18	2	0	0
194.027	2192226	C9H5N1O2S1	9	5	1	2	1
194.063	5548148	C10H9N1O1S1	10	9	1	1	1
194.081	5363069	C10H9N1O3S0	10	9	1	3	0
194.1	12129159	C11H13N1O0S1	11	13	1	0	1
194.117	106695568	C11H13N1O2S0	11	13	1	2	0
194.154	44800931	C12H17N1O1S0	12	17	1	1	0
194.19	204049333	C13H21N1O0S0	13	21	1	0	0
195.047	1433505	C10H8N0O2S1	10	8	0	2	1
195.059	1531750	C9H8N2O1S1	9	8	2	1	1
195.065	1721322	C10H8N0O4S0	10	8	0	4	0
195.076	1801583	C9H8N2O3S0	9	8	2	3	0
195.08	1814513	C14H8N0O1S0	14	8	0	1	0
195.084	1662643	C11H12N0O1S1	11	12	0	1	1
195.102	4901243	C11H12N0O3S0	11	12	0	3	0
195.103	1827836	C8H16N0O3S1	8	16	0	3	1
195.113	3555713	C10H12N2O2S0	10	12	2	2	0
195.117	5715843	C15H12N0O0S0	15	12	0	0	0
195.138	5095053	C12H16N0O2S0	12	16	0	2	0
195.149	3010706	C11H16N2O1S0	11	16	2	1	0
195.186	2616484	C12H20N2O0S0	12	20	2	0	0
196.043	1627704	C9H7N1O2S1	9	7	1	2	1
196.06	1954496	C9H7N1O4S0	9	7	1	4	0
196.079	8960841	C10H11N1O1S1	10	11	1	1	1
196.097	10427217	C10H11N1O3S0	10	11	1	3	0
196.112	1768024	C14H11N1O0S0	14	11	1	0	0
196.115	64569178	C11H15N1O0S1	11	15	1	0	1
196.133	12818274	C11H15N1O2S0	11	15	1	2	0
196.17	54136690	C12H19N1O1S0	12	19	1	1	0
196.206	121245571	C13H23N1O0S0	13	23	1	0	0
197.027	1383408	C9H6N0O3S1	9	6	0	3	1
197.063	2687232	C10H10N0O2S1	10	10	0	2	1
197.074	1535109	C9H10N2O1S1	9	10	2	1	1
197.081	1722887	C10H10N0O4S0	10	10	0	4	0
197.092	1521932	C9H10N2O3S0	9	10	2	3	0
197.096	3750158	C14H10N0O1S0	14	10	0	1	0
197.099	2432016	C11H14N0O1S1	11	14	0	1	1
197.107	4524563	C13H10N2O0S0	13	10	2	0	0
197.117	2345239	C11H14N0O3S0	11	14	0	3	0
197.128	3304988	C10H14N2O2S0	10	14	2	2	0
197.132	8244510	C15H14N0O0S0	15	14	0	0	0
197.165	3668524	C11H18N2O1S0	11	18	2	1	0
198.058	3601313	C9H9N1O2S1	9	9	1	2	1
198.076	1595688	C9H9N1O4S0	9	9	1	4	0
198.091	3631791	C13H9N1O1S0	13	9	1	1	0
198.095	4108976	C10H13N1O1S1	10	13	1	1	1
198.112	7560887	C10H13N1O3S0	10	13	1	3	0
198.128	6181565	C14H13N1O0S0	14	13	1	0	0
198.131	11639487	C11H17N1O0S1	11	17	1	0	1
198.149	11726534	C11H17N1O2S0	11	17	1	2	0
198.185	17156820	C12H21N1O1S0	12	21	1	1	0
198.222	2846435	C13H25N1O0S0	13	25	1	0	0
199.05	1259303	C11H4N2O2S0	11	4	2	2	0
199.054	1410600	C8H8N2O2S1	8	8	2	2	1
199.075	3609904	C13H8N0O2S0	13	8	0	2	0
199.079	2021682	C10H12N0O2S1	10	12	0	2	1
199.087	1719349	C12H8N2O1S0	12	8	2	1	0
199.09	2876982	C9H12N2O1S1	9	12	2	1	1
199.096	2126648	C10H12N0O4S0	10	12	0	4	0
199.108	1298493	C9H12N2O3S0	9	12	2	3	0
199.112	7263806	C14H12N0O1S0	14	12	0	1	0
199.123	2011330	C13H12N2O0S0	13	12	2	0	0
199.126	3477316	C10H16N2O0S1	10	16	2	0	1
199.148	11213900	C15H16N0O0S0	15	16	0	0	0
199.18	2893400	C11H20N2O1S0	11	20	2	1	0
200.038	1517073	C8H7N1O3S1	8	7	1	3	1
200.071	2932637	C12H7N1O2S0	12	7	1	2	0
200.074	3324574	C9H11N1O2S1	9	11	1	2	1
200.092	1485988	C9H11N1O4S0	9	11	1	4	0
200.107	8108458	C13H11N1O1S0	13	11	1	1	0
200.11	4626859	C10H15N1O1S1	10	15	1	1	1
200.128	4103345	C10H15N1O3S0	10	15	1	3	0
200.143	10260918	C14H15N1O0S0	14	15	1	0	0
200.147	5072568	C11H19N1O0S1	11	19	1	0	1
200.164	10807230	C11H19N1O2S0	11	19	1	2	0
201.055	2011499	C12H6N0O3S0	12	6	0	3	0
201.058	1646957	C9H10N0O3S1	9	10	0	3	1
201.066	1630191	C11H6N2O2S0	11	6	2	2	0
201.069	1242672	C8H10N2O2S1	8	10	2	2	1
201.091	7077111	C13H10N0O2S0	13	10	0	2	0
201.094	4143608	C10H14N0O2S1	10	14	0	2	1
201.102	2957051	C12H10N2O1S0	12	10	2	1	0
201.127	9173251	C14H14N0O1S0	14	14	0	1	0
201.131	2216580	C11H18N0O1S1	11	18	0	1	1
201.139	4848903	C13H14N2O0S0	13	14	2	0	0
201.142	1256392	C10H18N2O0S1	10	18	2	0	1
201.164	7734031	C15H18N0O0S0	15	18	0	0	0
201.196	1666073	C11H22N2O1S0	11	22	2	1	0
202.064	1360745	C15H5N1O0S0	15	5	1	0	0
202.086	8148015	C12H9N1O2S0	12	9	1	2	0
202.09	4552496	C9H13N1O2S1	9	13	1	2	1
202.123	16062522	C13H13N1O1S0	13	13	1	1	0
202.126	2945083	C10H17N1O1S1	10	17	1	1	1
202.144	1356545	C10H17N1O3S0	10	17	1	3	0
202.159	55191621	C14H17N1O0S0	14	17	1	0	0
202.162	3874118	C11H21N1O0S1	11	21	1	0	1
203.07	4547659	C12H8N0O3S0	12	8	0	3	0
203.074	2377548	C9H12N0O3S1	9	12	0	3	1
203.081	2271310	C11H8N2O2S0	11	8	2	2	0
203.085	4115791	C8H12N2O2S1	8	12	2	2	1
203.107	10881365	C13H12N0O2S0	13	12	0	2	0
203.11	11447638	C10H16N0O2S1	10	16	0	2	1
203.118	3915096	C12H12N2O1S0	12	12	2	1	0
203.143	8368479	C14H16N0O1S0	14	16	0	1	0
203.154	6462306	C13H16N2O0S0	13	16	2	0	0
203.179	5729129	C15H20N0O0S0	15	20	0	0	0
204.065	4113744	C11H7N1O3S0	11	7	1	3	0
204.084	2809941	C12H11N1O0S1	12	11	1	0	1
204.102	12670553	C12H11N1O2S0	12	11	1	2	0
204.105	1799770	C9H15N1O2S1	9	15	1	2	1
204.123	1278047	C9H15N1O4S0	9	15	1	4	0
204.138	36690530	C13H15N1O1S0	13	15	1	1	0
204.175	58772075	C14H19N1O0S0	14	19	1	0	0
205.043	1294137	C10H6N2O1S1	10	6	2	1	1
205.05	1545146	C11H6N0O4S0	11	6	0	4	0
205.052	1539515	C8H10N0O4S1	8	10	0	4	1
205.068	1728830	C12H10N0O1S1	12	10	0	1	1
205.086	5736258	C12H10N0O3S0	12	10	0	3	0
205.089	3639619	C9H14N0O3S1	9	14	0	3	1
205.097	6322501	C11H10N2O2S0	11	10	2	2	0
205.101	1695942	C16H10N0O0S0	16	10	0	0	0
205.105	1305862	C13H14N0O0S1	13	14	0	0	1
205.122	11373386	C13H14N0O2S0	13	14	0	2	0
205.134	5338445	C12H14N2O1S0	12	14	2	1	0
205.159	5308242	C14H18N0O1S0	14	18	0	1	0
205.17	1649749	C13H18N2O0S0	13	18	2	0	0
205.195	1704795	C15H22N0O0S0	15	22	0	0	0
206.063	3239698	C11H9N1O1S1	11	9	1	1	1
206.081	6264853	C11H9N1O3S0	11	9	1	3	0
206.1	5258265	C12H13N1O0S1	12	13	1	0	1
206.103	3406362	C9H17N1O0S2	9	17	1	0	2
206.118	33696796	C12H13N1O2S0	12	13	1	2	0
206.154	67054628	C13H17N1O1S0	13	17	1	1	0
206.19	78609451	C14H21N1O0S0	14	21	1	0	0
207.047	1962698	C11H8N0O2S1	11	8	0	2	1
207.065	2989005	C11H8N0O4S0	11	8	0	4	0
207.076	2943183	C10H8N2O3S0	10	8	2	3	0
207.084	1587281	C12H12N0O1S1	12	12	0	1	1
207.102	7675604	C12H12N0O3S0	12	12	0	3	0
207.113	5334742	C11H12N2O2S0	11	12	2	2	0
207.117	4677334	C16H12N0O0S0	16	12	0	0	0
207.12	5463767	C13H16N0O0S1	13	16	0	0	1
207.138	7470298	C13H16N0O2S0	13	16	0	2	0
207.149	2859996	C12H16N2O1S0	12	16	2	1	0
207.174	2048480	C14H20N0O1S0	14	20	0	1	0
207.185	3574754	C13H20N2O0S0	13	20	2	0	0
208.043	7049069	C10H7N1O2S1	10	7	1	2	1
208.061	1638895	C10H7N1O4S0	10	7	1	4	0
208.079	6621042	C11H11N1O1S1	11	11	1	1	1
208.097	9294197	C11H11N1O3S0	11	11	1	3	0
208.112	2760823	C15H11N1O0S0	15	11	1	0	0
208.115	21378424	C12H15N1O0S1	12	15	1	0	1
208.133	28335482	C12H15N1O2S0	12	15	1	2	0
208.17	78904704	C13H19N1O1S0	13	19	1	1	0
208.206	122846597	C14H23N1O0S0	14	23	1	0	0
209.027	1873526	C10H6N0O3S1	10	6	0	3	1
209.061	2418938	C14H6N0O2S0	14	6	0	2	0
209.063	2468602	C11H10N0O2S1	11	10	0	2	1
209.074	2290684	C10H10N2O1S1	10	10	2	1	1
209.081	2911996	C11H10N0O4S0	11	10	0	4	0
209.092	2853630	C10H10N2O3S0	10	10	2	3	0
209.096	4165118	C15H10N0O1S0	15	10	0	1	0
209.1	3238143	C12H14N0O1S1	12	14	0	1	1
209.107	1683584	C14H10N2O0S0	14	10	2	0	0
209.117	4840449	C12H14N0O3S0	12	14	0	3	0
209.119	2959873	C9H18N0O3S1	9	18	0	3	1
209.128	4088834	C11H14N2O2S0	11	14	2	2	0
209.132	8395267	C16H14N0O0S0	16	14	0	0	0
209.154	2803333	C13H18N0O2S0	13	18	0	2	0
209.165	3378695	C12H18N2O1S0	12	18	2	1	0
209.201	1602827	C13H22N2O0S0	13	22	2	0	0
210.058	5522028	C10H9N1O2S1	10	9	1	2	1
210.076	2775150	C10H9N1O4S0	10	9	1	4	0
210.091	2520432	C14H9N1O1S0	14	9	1	1	0
210.095	13595248	C11H13N1O1S1	11	13	1	1	1
210.112	11615858	C11H13N1O3S0	11	13	1	3	0
210.128	3320947	C15H13N1O0S0	15	13	1	0	0
210.131	27686516	C12H17N1O0S1	12	17	1	0	1
210.149	12649077	C12H17N1O2S0	12	17	1	2	0
210.185	48279161	C13H21N1O1S0	13	21	1	1	0
210.222	23936637	C14H25N1O0S0	14	25	1	0	0
211.04	3120583	C13H4N0O3S0	13	4	0	3	0
211.042	1922759	C10H8N0O3S1	10	8	0	3	1
211.054	2092872	C9H8N2O2S1	9	8	2	2	1
211.06	1364744	C10H8N0O5S0	10	8	0	5	0
211.075	4199113	C14H8N0O2S0	14	8	0	2	0
211.079	2955210	C11H12N0O2S1	11	12	0	2	1
211.087	2148042	C13H8N2O1S0	13	8	2	1	0
211.09	1373259	C10H12N2O1S1	10	12	2	1	1
211.097	2538699	C11H12N0O4S0	11	12	0	4	0
211.108	3043276	C10H12N2O3S0	10	12	2	3	0
211.112	7435468	C15H12N0O1S0	15	12	0	1	0
211.115	2731469	C12H16N0O1S1	12	16	0	1	1
211.123	10616525	C14H12N2O0S0	14	12	2	0	0
211.126	1332941	C11H16N2O0S1	11	16	2	0	1
211.133	2225742	C12H16N0O3S0	12	16	0	3	0
211.144	2868175	C11H16N2O2S0	11	16	2	2	0
211.148	9477839	C16H16N0O0S0	16	16	0	0	0
211.18	2751442	C12H20N2O1S0	12	20	2	1	0
212.038	1715469	C9H7N1O3S1	9	7	1	3	1
212.071	1884815	C13H7N1O2S0	13	7	1	2	0
212.074	8498960	C10H11N1O2S1	10	11	1	2	1
212.092	2922001	C10H11N1O4S0	10	11	1	4	0
212.107	8353554	C14H11N1O1S0	14	11	1	1	0
212.11	9360146	C11H15N1O1S1	11	15	1	1	1
212.128	9881363	C11H15N1O3S0	11	15	1	3	0
212.143	9102100	C15H15N1O0S0	15	15	1	0	0
212.147	10443540	C12H19N1O0S1	12	19	1	0	1
212.165	13367061	C12H19N1O2S0	12	19	1	2	0
212.201	12216087	C13H23N1O1S0	13	23	1	1	0
213.056	2986049	C13H6N0O3S0	13	6	0	3	0
213.066	1523138	C12H6N2O2S0	12	6	2	2	0
213.069	4396354	C9H10N2O2S1	9	10	2	2	1
213.073	2101570	C14H10N0O0S1	14	10	0	0	1
213.076	1404994	C10H10N0O5S0	10	10	0	5	0
213.077	1638082	C7H14N0O5S1	7	14	0	5	1
213.087	1469378	C9H10N2O4S0	9	10	2	4	0
213.091	6664515	C14H10N0O2S0	14	10	0	2	0
213.094	3379523	C11H14N0O2S1	11	14	0	2	1
213.102	4449603	C13H10N2O1S0	13	10	2	1	0
213.106	3048003	C10H14N2O1S1	10	14	2	1	1
213.112	2474819	C11H14N0O4S0	11	14	0	4	0
213.123	1698244	C10H14N2O3S0	10	14	2	3	0
213.127	10275652	C15H14N0O1S0	15	14	0	1	0
213.131	2345796	C12H18N0O1S1	12	18	0	1	1
213.139	3057477	C14H14N2O0S0	14	14	2	0	0
213.142	2189637	C11H18N2O0S1	11	18	2	0	1
213.16	1748677	C11H18N2O2S0	11	18	2	2	0
213.164	9560902	C16H18N0O0S0	16	18	0	0	0
213.185	2010438	C13H22N0O2S0	13	22	0	2	0
213.196	1426503	C12H22N2O1S0	12	22	2	1	0
214.053	2065505	C9H9N1O3S1	9	9	1	3	1
214.086	6712674	C13H9N1O2S0	13	9	1	2	0
214.09	3406946	C10H13N1O2S1	10	13	1	2	1
214.107	1866850	C10H13N1O4S0	10	13	1	4	0
214.123	17379171	C14H13N1O1S0	14	13	1	1	0
214.126	29036387	C11H17N1O1S1	11	17	1	1	1
214.144	3563875	C11H17N1O3S0	11	17	1	3	0
214.159	16340836	C15H17N1O0S0	15	17	1	0	0
214.162	9306980	C12H21N1O0S1	12	21	1	0	1
214.18	9889636	C12H21N1O2S0	12	21	1	2	0
215.035	4435312	C12H4N0O4S0	12	4	0	4	0
215.07	3904112	C13H8N0O3S0	13	8	0	3	0
215.074	1844848	C10H12N0O3S1	10	12	0	3	1
215.082	1485808	C12H8N2O2S0	12	8	2	2	0
215.085	2026352	C9H12N2O2S1	9	12	2	2	1
215.089	1290736	C14H12N0O0S1	14	12	0	0	1
215.107	12581744	C14H12N0O2S0	14	12	0	2	0
215.11	3055217	C11H16N0O2S1	11	16	0	2	1
215.118	5433713	C13H12N2O1S0	13	12	2	1	0
215.143	12719985	C15H16N0O1S0	15	16	0	1	0
215.146	2561649	C12H20N0O1S1	12	20	0	1	1
215.154	9285489	C14H16N2O0S0	14	16	2	0	0
215.179	7948145	C16H20N0O0S0	16	20	0	0	0
216.066	2320239	C12H7N1O3S0	12	7	1	3	0
216.069	1650799	C9H11N1O3S1	9	11	1	3	1
216.102	18077551	C13H11N1O2S0	13	11	1	2	0
216.105	6376815	C10H15N1O2S1	10	15	1	2	1
216.123	1982575	C10H15N1O4S0	10	15	1	4	0
216.138	29618030	C14H15N1O1S0	14	15	1	1	0
216.142	6689646	C11H19N1O1S1	11	19	1	1	1
216.159	2867566	C11H19N1O3S0	11	19	1	3	0
216.175	50163566	C15H19N1O0S0	15	19	1	0	0
216.178	4397934	C12H23N1O0S1	12	23	1	0	1
217.017	1306208	C8H6N0O5S1	8	6	0	5	1
217.049	1702880	C12H6N0O4S0	12	6	0	4	0
217.068	1721311	C13H10N0O1S1	13	10	0	1	1
217.086	7522143	C13H10N0O3S0	13	10	0	3	0
217.089	3711071	C10H14N0O3S1	10	14	0	3	1
217.097	3728479	C12H10N2O2S0	12	10	2	2	0
217.122	13254494	C14H14N0O2S0	14	14	0	2	0
217.126	1700702	C11H18N0O2S1	11	18	0	2	1
217.134	5397342	C13H14N2O1S0	13	14	2	1	0
217.159	8247645	C15H18N0O1S0	15	18	0	1	0
217.17	7453533	C14H18N2O0S0	14	18	2	0	0
217.195	4325724	C16H22N0O0S0	16	22	0	0	0
218.063	1349955	C12H9N1O1S1	12	9	1	1	1
218.081	6903106	C12H9N1O3S0	12	9	1	3	0
218.1	3942721	C13H13N1O0S1	13	13	1	0	1
218.118	17575745	C13H13N1O2S0	13	13	1	2	0
218.139	1302208	C10H17N1O4S0	10	17	1	4	0
218.154	49733439	C14H17N1O1S0	14	17	1	1	0
218.19	58081086	C15H21N1O0S0	15	21	1	0	0
219	1364957	C13H0N2O0S1	13	0	2	0	1
219.029	1266331	C11H4N0O5S0	11	4	0	5	0
219.047	1467035	C12H8N0O2S1	12	8	0	2	1
219.065	2716186	C12H8N0O4S0	12	8	0	4	0
219.076	1609625	C11H8N2O3S0	11	8	2	3	0
219.084	1391385	C13H12N0O1S1	13	12	0	1	1
219.091	1389337	C15H8N2O0S0	15	8	2	0	0
219.095	1650648	C12H12N2O0S1	12	12	2	0	1
219.101	6491928	C13H12N0O3S0	13	12	0	3	0
219.105	2088888	C10H16N0O3S1	10	16	0	3	1
219.113	6341400	C12H12N2O2S0	12	12	2	2	0
219.117	1670679	C17H12N0O0S0	17	12	0	0	0
219.138	8283414	C14H16N0O2S0	14	16	0	2	0
219.149	3099926	C13H16N2O1S0	13	16	2	1	0
219.174	4412181	C15H20N0O1S0	15	20	0	1	0
219.186	2213652	C14H20N2O0S0	14	20	2	0	0
219.211	1687315	C16H24N0O0S0	16	24	0	0	0
220.003	1668714	C13H-1N1O3S0	13	-1	1	3	0
220.025	1528297	C10H3N1O5S0	10	3	1	5	0
220.026	1404009	C11H7N1O0S2	11	7	1	0	2
220.043	1752808	C11H7N1O2S1	11	7	1	2	1
220.06	2024935	C11H7N1O4S0	11	7	1	4	0
220.077	1527910	C15H7N1O1S0	15	7	1	1	0
220.079	4219622	C12H11N1O1S1	12	11	1	1	1
220.097	9716453	C12H11N1O3S0	12	11	1	3	0
220.112	1960804	C16H11N1O0S0	16	11	1	0	0
220.115	8397028	C13H15N1O0S1	13	15	1	0	1
220.119	1447268	C10H19N1O0S2	10	19	1	0	2
220.133	29593315	C13H15N1O2S0	13	15	1	2	0
220.17	67518177	C14H19N1O1S0	14	19	1	1	0
220.206	43933407	C15H23N1O0S0	15	23	1	0	0
221.018	1263917	C13H2N2O0S1	13	2	2	0	1
221.026	2286509	C11H6N0O3S1	11	6	0	3	1
221.044	1455404	C11H6N0O5S0	11	6	0	5	0
221.063	2075562	C12H10N0O2S1	12	10	0	2	1
221.074	1695146	C11H10N2O1S1	11	10	2	1	1
221.081	4227241	C12H10N0O4S0	12	10	0	4	0
221.084	1650217	C9H14N0O4S1	9	14	0	4	1
221.092	4436648	C11H10N2O3S0	11	10	2	3	0
221.096	3152296	C16H10N0O1S0	16	10	0	1	0
221.099	2735272	C13H14N0O1S1	13	14	0	1	1
221.107	1662375	C15H10N2O0S0	15	10	2	0	0
221.117	9088679	C13H14N0O3S0	13	14	0	3	0
221.119	2037159	C10H18N0O3S1	10	18	0	3	1
221.128	6113958	C12H14N2O2S0	12	14	2	2	0
221.132	6880934	C17H14N0O0S0	17	14	0	0	0
221.154	5101732	C14H18N0O2S0	14	18	0	2	0
221.165	3763876	C13H18N2O1S0	13	18	2	1	0
221.19	1757538	C15H22N0O1S0	15	22	0	1	0
221.201	5013153	C14H22N2O0S0	14	22	2	0	0
222.058	8813159	C11H9N1O2S1	11	9	1	2	1
222.076	4447845	C11H9N1O4S0	11	9	1	4	0
222.091	2167396	C15H9N1O1S0	15	9	1	1	0
222.095	10212964	C12H13N1O1S1	12	13	1	1	1
222.113	19101283	C12H13N1O3S0	12	13	1	3	0
222.128	4166754	C16H13N1O0S0	16	13	1	0	0
222.131	81116769	C13H17N1O0S1	13	17	1	0	1
222.149	31927904	C13H17N1O2S0	13	17	1	2	0
222.185	99499613	C14H21N1O1S0	14	21	1	1	0
222.222	34381403	C15H25N1O0S0	15	25	1	0	0
223.042	2068381	C11H8N0O3S1	11	8	0	3	1
223.054	1452188	C10H8N2O2S1	10	8	2	2	1
223.06	1627932	C11H8N0O5S0	11	8	0	5	0
223.071	1463963	C10H8N2O4S0	10	8	2	4	0
223.075	2231323	C15H8N0O2S0	15	8	0	2	0
223.079	2622490	C12H12N0O2S1	12	12	0	2	1
223.09	1525274	C11H12N2O1S1	11	12	2	1	1
223.096	3590169	C12H12N0O4S0	12	12	0	4	0
223.108	3959832	C11H12N2O3S0	11	12	2	3	0
223.112	5361944	C16H12N0O1S0	16	12	0	1	0
223.115	2642456	C13H16N0O1S1	13	16	0	1	1
223.123	4662807	C15H12N2O0S0	15	12	2	0	0
223.133	4238870	C13H16N0O3S0	13	16	0	3	0
223.134	7640086	C10H20N0O3S1	10	20	0	3	1
223.144	4707349	C12H16N2O2S0	12	16	2	2	0
223.148	7424533	C17H16N0O0S0	17	16	0	0	0
223.169	1736211	C14H20N0O2S0	14	20	0	2	0
223.181	4026387	C13H20N2O1S0	13	20	2	1	0
223.217	2782736	C14H24N2O0S0	14	24	2	0	0
224.038	1313614	C10H7N1O3S1	10	7	1	3	1
224.074	4479691	C11H11N1O2S1	11	11	1	2	1
224.092	4904394	C11H11N1O4S0	11	11	1	4	0
224.107	3581896	C15H11N1O1S0	15	11	1	1	0
224.11	13694408	C12H15N1O1S1	12	15	1	1	1
224.128	9688519	C12H15N1O3S0	12	15	1	3	0
224.143	5113797	C16H15N1O0S0	16	15	1	0	0
224.147	11096517	C13H19N1O0S1	13	19	1	0	1
224.164	13301188	C13H19N1O2S0	13	19	1	2	0
224.201	27459009	C14H23N1O1S0	14	23	1	1	0
224.237	4790206	C15H27N1O0S0	15	27	1	0	0
225.022	1298428	C10H6N0O4S1	10	6	0	4	1
225.056	2898553	C14H6N0O3S0	14	6	0	3	0
225.058	1825273	C11H10N0O3S1	11	10	0	3	1
225.069	2619256	C10H10N2O2S1	10	10	2	2	1
225.073	2169336	C15H10N0O0S1	15	10	0	0	1
225.076	1300984	C11H10N0O5S0	11	10	0	5	0
225.087	1572599	C10H10N2O4S0	10	10	2	4	0
225.091	4839286	C15H10N0O2S0	15	10	0	2	0
225.094	2445430	C12H14N0O2S1	12	14	0	2	1
225.102	2460533	C14H10N2O1S0	14	10	2	1	0
225.106	2636661	C11H14N2O1S1	11	14	2	1	1
225.112	1787765	C12H14N0O4S0	12	14	0	4	0
225.114	2225268	C9H18N0O4S1	9	18	0	4	1
225.123	2058868	C11H14N2O3S0	11	14	2	3	0
225.127	8122227	C16H14N0O1S0	16	14	0	1	0
225.131	2041971	C13H18N0O1S1	13	18	0	1	1
225.139	9009522	C15H14N2O0S0	15	14	2	0	0
225.148	1349105	C13H18N0O3S0	13	18	0	3	0
225.16	2040432	C12H18N2O2S0	12	18	2	2	0
225.164	7266160	C17H18N0O0S0	17	18	0	0	0
225.196	1387117	C13H22N2O1S0	13	22	2	1	0
226.053	2465572	C10H9N1O3S1	10	9	1	3	1
226.071	1548834	C10H9N1O5S0	10	9	1	5	0
226.071	1548834	C11H13N1O0S2	11	13	1	0	2
226.086	5990177	C14H9N1O2S0	14	9	1	2	0
226.09	8468769	C11H13N1O2S1	11	13	1	2	1
226.107	3645215	C11H13N1O4S0	11	13	1	4	0
226.123	14486814	C15H13N1O1S0	15	13	1	1	0
226.126	25369885	C12H17N1O1S1	12	17	1	1	1
226.144	12067100	C12H17N1O3S0	12	17	1	3	0
226.159	12782875	C16H17N1O0S0	16	17	1	0	0
226.162	8892698	C13H21N1O0S1	13	21	1	0	1
226.18	13016345	C13H21N1O2S0	13	21	1	2	0
226.217	10934550	C14H25N1O1S0	14	25	1	1	0
227.071	3878603	C14H8N0O3S0	14	8	0	3	0
227.082	3202251	C13H8N2O2S0	13	8	2	2	0
227.085	3589834	C10H12N2O2S1	10	12	2	2	1
227.089	3658698	C15H12N0O0S1	15	12	0	0	1
227.107	10012872	C15H12N0O2S0	15	12	0	2	0
227.11	3041480	C12H16N0O2S1	12	16	0	2	1
227.118	4505287	C14H12N2O1S0	14	12	2	1	0
227.121	1859527	C11H16N2O1S1	11	16	2	1	1
227.139	2102470	C11H16N2O3S0	11	16	2	3	0
227.143	9535685	C16H16N0O1S0	16	16	0	1	0
227.146	2472901	C13H20N0O1S1	13	20	0	1	1
227.154	3683780	C15H16N2O0S0	15	16	2	0	0
227.176	1402818	C12H20N2O2S0	12	20	2	2	0
227.179	9828546	C17H20N0O0S0	17	20	0	0	0
228.066	1415797	C13H7N1O3S0	13	7	1	3	0
228.069	1786485	C10H11N1O3S1	10	11	1	3	1
228.102	10639474	C14H11N1O2S0	14	11	1	2	0
228.105	1786226	C11H15N1O2S1	11	15	1	2	1
228.123	2182257	C11H15N1O4S0	11	15	1	4	0
228.138	17110127	C15H15N1O1S0	15	15	1	1	0
228.142	43703407	C12H19N1O1S1	12	19	1	1	1
228.159	2847597	C12H19N1O3S0	12	19	1	3	0
228.175	19137644	C16H19N1O0S0	16	19	1	0	0
228.178	6071404	C13H23N1O0S1	13	23	1	0	1
228.196	4745834	C13H23N1O2S0	13	23	1	2	0
229.051	5670434	C13H6N0O4S0	13	6	0	4	0
229.086	8339487	C14H10N0O3S0	14	10	0	3	0
229.089	1522719	C11H14N0O3S1	11	14	0	3	1
229.097	3286558	C13H10N2O2S0	13	10	2	2	0
229.101	2671902	C10H14N2O2S1	10	14	2	2	1
229.105	4793373	C15H14N0O0S1	15	14	0	0	1
229.118	1339036	C10H14N2O4S0	10	14	2	4	0
229.122	13339676	C15H14N0O2S0	15	14	0	2	0
229.126	2630940	C12H18N0O2S1	12	18	0	2	1
229.134	6347291	C14H14N2O1S0	14	14	2	1	0
229.159	8746009	C16H18N0O1S0	16	18	0	1	0
229.162	3316761	C13H22N0O1S1	13	22	0	1	1
229.17	9022488	C15H18N2O0S0	15	18	2	0	0
229.195	4070422	C17H22N0O0S0	17	22	0	0	0
230.064	1818191	C13H9N1O1S1	13	9	1	1	1
230.081	4381646	C13H9N1O3S0	13	9	1	3	0
230.085	1915085	C10H13N1O3S1	10	13	1	3	1
230.1	2105036	C14H13N1O0S1	14	13	1	0	1
230.118	26620875	C14H13N1O2S0	14	13	1	2	0
230.121	6450122	C11H17N1O2S1	11	17	1	2	1
230.137	2196169	C11H17N1O4S0	11	17	1	4	0
230.154	35830728	C15H17N1O1S0	15	17	1	1	0
230.157	8457160	C12H21N1O1S1	12	21	1	1	1
230.175	5704134	C12H21N1O3S0	12	21	1	3	0
230.19	40283077	C16H21N1O0S0	16	21	1	0	0
230.194	3820485	C13H25N1O0S1	13	25	1	0	1
231.012	2037125	C12H4N0O3S1	12	4	0	3	1
231.065	2748033	C13H8N0O4S0	13	8	0	4	0
231.076	1283585	C12H8N2O3S0	12	8	2	3	0
231.084	2926208	C14H12N0O1S1	14	12	0	1	1
231.102	6991231	C14H12N0O3S0	14	12	0	3	0
231.105	2887678	C11H16N0O3S1	11	16	0	3	1
231.113	3603966	C13H12N2O2S0	13	12	2	2	0
231.138	9634684	C15H16N0O2S0	15	16	0	2	0
231.149	5178235	C14H16N2O1S0	14	16	2	1	0
231.174	4162425	C16H20N0O1S0	16	20	0	1	0
231.186	5367672	C15H20N2O0S0	15	20	2	0	0
231.211	2050167	C17H24N0O0S0	17	24	0	0	0
232.043	1802555	C12H7N1O2S1	12	7	1	2	1
232.06	3195706	C12H7N1O4S0	12	7	1	4	0
232.079	4151097	C13H11N1O1S1	13	11	1	1	1
232.097	14445368	C13H11N1O3S0	13	11	1	3	0
232.1	1473399	C10H15N1O3S1	10	15	1	3	1
232.112	1410487	C17H11N1O0S0	17	11	1	0	0
232.116	7257910	C14H15N1O0S1	14	15	1	0	1
232.133	30260021	C14H15N1O2S0	14	15	1	2	0
232.137	3013173	C11H19N1O2S1	11	19	1	2	1
232.17	54131507	C15H19N1O1S0	15	19	1	1	0
232.206	54201136	C16H23N1O0S0	16	23	1	0	0
233.063	1886713	C13H10N0O2S1	13	10	0	2	1
233.081	4534008	C13H10N0O4S0	13	10	0	4	0
233.092	3511031	C12H10N2O3S0	12	10	2	3	0
233.096	1829111	C17H10N0O1S0	17	10	0	1	0
233.099	1924855	C14H14N0O1S1	14	14	0	1	1
233.117	8942326	C14H14N0O3S0	14	14	0	3	0
233.121	3590902	C11H18N0O3S1	11	18	0	3	1
233.129	10356469	C13H14N2O2S0	13	14	2	2	0
233.132	3339253	C18H14N0O0S0	18	14	0	0	0
233.154	9114356	C15H18N0O2S0	15	18	0	2	0
233.165	4950771	C14H18N2O1S0	14	18	2	1	0
233.19	2761970	C16H22N0O1S0	16	22	0	1	0
233.201	3120881	C15H22N2O0S0	15	22	2	0	0
233.227	1401327	C17H26N0O0S0	17	26	0	0	0
234.058	4248769	C12H9N1O2S1	12	9	1	2	1
234.076	3303616	C12H9N1O4S0	12	9	1	4	0
234.095	4280511	C13H13N1O1S1	13	13	1	1	1
234.112	13097662	C13H13N1O3S0	13	13	1	3	0
234.128	2091454	C17H13N1O0S0	17	13	1	0	0
234.131	11284158	C14H17N1O0S1	14	17	1	0	1
234.149	35736253	C14H17N1O2S0	14	17	1	2	0
234.185	66992827	C15H21N1O1S0	15	21	1	1	0
234.222	20339385	C16H25N1O0S0	16	25	1	0	0
235.04	1429651	C15H4N0O3S0	15	4	0	3	0
235.042	2029459	C12H8N0O3S1	12	8	0	3	1
235.054	1355027	C11H8N2O2S1	11	8	2	2	1
235.058	2200723	C16H8N0O0S1	16	8	0	0	1
235.06	1965459	C12H8N0O5S0	12	8	0	5	0
235.071	2150290	C11H8N2O4S0	11	8	2	4	0
235.075	1623186	C16H8N0O2S0	16	8	0	2	0
235.079	2480786	C13H12N0O2S1	13	12	0	2	1
235.087	1376658	C15H8N2O1S0	15	8	2	1	0
235.09	1689233	C12H12N2O1S1	12	12	2	1	1
235.097	7288465	C13H12N0O4S0	13	12	0	4	0
235.108	5706385	C12H12N2O3S0	12	12	2	3	0
235.112	4113553	C17H12N0O1S0	17	12	0	1	0
235.123	1643280	C16H12N2O0S0	16	12	2	0	0
235.133	8055440	C14H16N0O3S0	14	16	0	3	0
235.135	3282320	C11H20N0O3S1	11	20	0	3	1
235.144	8627855	C13H16N2O2S0	13	16	2	2	0
235.148	6455951	C18H16N0O0S0	18	16	0	0	0
235.169	7186062	C15H20N0O2S0	15	20	0	2	0
235.181	5029006	C14H20N2O1S0	14	20	2	1	0
235.217	3046796	C15H24N2O0S0	15	24	2	0	0
236.074	4811631	C12H11N1O2S1	12	11	1	2	1
236.092	4965230	C12H11N1O4S0	12	11	1	4	0
236.107	2122094	C16H11N1O1S0	16	11	1	1	0
236.11	11321966	C13H15N1O1S1	13	15	1	1	1
236.128	14776941	C13H15N1O3S0	13	15	1	3	0
236.143	3799149	C17H15N1O0S0	17	15	1	0	0
236.147	35072621	C14H19N1O0S1	14	19	1	0	1
236.165	21129836	C14H19N1O2S0	14	19	1	2	0
236.201	54409835	C15H23N1O1S0	15	23	1	1	0
236.237	7085674	C16H27N1O0S0	16	27	1	0	0
237.021	1777625	C11H6N0O4S1	11	6	0	4	1
237.056	1979480	C15H6N0O3S0	15	6	0	3	0
237.058	1994584	C12H10N0O3S1	12	10	0	3	1
237.069	2510424	C11H10N2O2S1	11	10	2	2	1
237.073	4810328	C16H10N0O0S1	16	10	0	0	1
237.076	2402648	C12H10N0O5S0	12	10	0	5	0
237.087	3134552	C11H10N2O4S0	11	10	2	4	0
237.091	4334680	C16H10N0O2S0	16	10	0	2	0
237.094	2640984	C13H14N0O2S1	13	14	0	2	1
237.106	1590232	C12H14N2O1S1	12	14	2	1	1
237.112	4065367	C13H14N0O4S0	13	14	0	4	0
237.114	2765399	C10H18N0O4S1	10	18	0	4	1
237.123	3728983	C12H14N2O3S0	12	14	2	3	0
237.127	7172695	C17H14N0O1S0	17	14	0	1	0
237.139	6402647	C16H14N2O0S0	16	14	2	0	0
237.142	1497431	C13H18N2O0S1	13	18	2	0	1
237.149	3730263	C14H18N0O3S0	14	18	0	3	0
237.15	6049367	C11H22N0O3S1	11	22	0	3	1
237.16	3400023	C13H18N2O2S0	13	18	2	2	0
237.164	6129751	C18H18N0O0S0	18	18	0	0	0
237.185	1562646	C15H22N0O2S0	15	22	0	2	0
237.196	5070934	C14H22N2O1S0	14	22	2	1	0
238.051	1466959	C14H5N1O3S0	14	5	1	3	0
238.053	3250255	C11H9N1O3S1	11	9	1	3	1
238.071	1746255	C11H9N1O5S0	11	9	1	5	0
238.071	1746255	C12H13N1O0S2	12	13	1	0	2
238.086	1749583	C15H9N1O2S0	15	9	1	2	0
238.09	6258767	C12H13N1O2S1	12	13	1	2	1
238.107	6818895	C12H13N1O4S0	12	13	1	4	0
238.123	5969999	C16H13N1O1S0	16	13	1	1	0
238.126	33675855	C13H17N1O1S1	13	17	1	1	1
238.144	15198799	C13H17N1O3S0	13	17	1	3	0
238.159	10578511	C17H17N1O0S0	17	17	1	0	0
238.162	9640527	C14H21N1O0S1	14	21	1	0	1
238.18	29149775	C14H21N1O2S0	14	21	1	2	0
238.217	20574799	C15H25N1O1S0	15	25	1	1	0
238.253	1614927	C16H29N1O0S0	16	29	1	0	0
239.071	2930005	C15H8N0O3S0	15	8	0	3	0
239.074	1903957	C12H12N0O3S1	12	12	0	3	1
239.082	1352534	C14H8N2O2S0	14	8	2	2	0
239.085	2384726	C11H12N2O2S1	11	12	2	2	1
239.089	5650006	C16H12N0O0S1	16	12	0	0	1
239.091	1647446	C12H12N0O5S0	12	12	0	5	0
239.103	2988118	C11H12N2O4S0	11	12	2	4	0
239.107	7036502	C16H12N0O2S0	16	12	0	2	0
239.11	2912086	C13H16N0O2S1	13	16	0	2	1
239.118	3311190	C15H12N2O1S0	15	12	2	1	0
239.121	2282838	C12H16N2O1S1	12	16	2	1	1
239.129	4503126	C10H20N0O4S1	10	20	0	4	1
239.139	3067734	C12H16N2O3S0	12	16	2	3	0
239.143	7486038	C17H16N0O1S0	17	16	0	1	0
239.154	4870743	C16H16N2O0S0	16	16	2	0	0
239.158	2308439	C13H20N2O0S1	13	20	2	0	1
239.175	1684823	C13H20N2O2S0	13	20	2	2	0
239.179	5794903	C18H20N0O0S0	18	20	0	0	0
239.212	1763672	C14H24N2O1S0	14	24	2	1	0
240.066	3157612	C14H7N1O3S0	14	7	1	3	0
240.069	3172972	C11H11N1O3S1	11	11	1	3	1
240.084	3261549	C15H11N1O0S1	15	11	1	0	1
240.087	1583085	C11H11N1O5S0	11	11	1	5	0
240.087	1583085	C12H15N1O0S2	12	15	1	0	2
240.102	8193645	C15H11N1O2S0	15	11	1	2	0
240.105	7628397	C12H15N1O2S1	12	15	1	2	1
240.123	6321774	C12H15N1O4S0	12	15	1	4	0
240.138	18760302	C16H15N1O1S0	16	15	1	1	0
240.142	36035182	C13H19N1O1S1	13	19	1	1	1
240.159	10117743	C13H19N1O3S0	13	19	1	3	0
240.175	31009391	C17H19N1O0S0	17	19	1	0	0
240.178	6457968	C14H23N1O0S1	14	23	1	0	1
240.196	13857392	C14H23N1O2S0	14	23	1	2	0
240.232	11313777	C15H27N1O1S0	15	27	1	1	0
241.051	2024340	C14H6N0O4S0	14	6	0	4	0
241.068	1293077	C15H10N0O1S1	15	10	0	1	1
241.086	4150421	C15H10N0O3S0	15	10	0	3	0
241.097	4939414	C14H10N2O2S0	14	10	2	2	0
241.101	3339414	C11H14N2O2S1	11	14	2	2	1
241.105	3648150	C16H14N0O0S1	16	14	0	0	1
241.118	1560983	C11H14N2O4S0	11	14	2	4	0
241.122	9554583	C16H14N0O2S0	16	14	0	2	0
241.126	2824087	C13H18N0O2S1	13	18	0	2	1
241.133	3459224	C15H14N2O1S0	15	14	2	1	0
241.137	2089240	C12H18N2O1S1	12	18	2	1	1
241.144	1436312	C13H18N0O4S0	13	18	0	4	0
241.155	1959577	C12H18N2O3S0	12	18	2	3	0
241.159	5678745	C17H18N0O1S0	17	18	0	1	0
241.162	2688665	C14H22N0O1S1	14	22	0	1	1
241.17	2701210	C16H18N2O0S0	16	18	2	0	0
241.191	1268251	C13H22N2O2S0	13	22	2	2	0
241.195	2565659	C18H22N0O0S0	18	22	0	0	0
242.048	1290191	C10H9N1O4S1	10	9	1	4	1
242.081	4362961	C14H9N1O3S0	14	9	1	3	0
242.085	2835665	C11H13N1O3S1	11	13	1	3	1
242.1	1468883	C15H13N1O0S1	15	13	1	0	1
242.102	1440723	C11H13N1O5S0	11	13	1	5	0
242.102	1440723	C12H17N1O0S2	12	17	1	0	2
242.118	23261908	C15H13N1O2S0	15	13	1	2	0
242.121	5194452	C12H17N1O2S1	12	17	1	2	1
242.139	2956501	C12H17N1O4S0	12	17	1	4	0
242.154	37558998	C16H17N1O1S0	16	17	1	1	0
242.157	52886231	C13H21N1O1S1	13	21	1	1	1
242.175	3276504	C13H21N1O3S0	13	21	1	3	0
242.19	27925209	C17H21N1O0S0	17	21	1	0	0
242.194	5103321	C14H25N1O0S1	14	25	1	0	1
242.212	8602331	C14H25N1O2S0	14	25	1	2	0
243.066	2541345	C14H8N0O4S0	14	8	0	4	0
243.08	2106658	C10H12N2O3S1	10	12	2	3	1
243.084	1705122	C15H12N0O1S1	15	12	0	1	1
243.102	6718756	C15H12N0O3S0	15	12	0	3	0
243.105	1667620	C12H16N0O3S1	12	16	0	3	1
243.113	3156773	C14H12N2O2S0	14	12	2	2	0
243.116	1726885	C11H16N2O2S1	11	16	2	2	1
243.12	6903077	C16H16N0O0S1	16	16	0	0	1
243.134	1874727	C11H16N2O4S0	11	16	2	4	0
243.138	9840423	C16H16N0O2S0	16	16	0	2	0
243.149	4694568	C15H16N2O1S0	15	16	2	1	0
243.174	4330282	C17H20N0O1S0	17	20	0	1	0
243.178	1348395	C14H24N0O1S1	14	24	0	1	1
243.185	4526636	C16H20N2O0S0	16	20	2	0	0
243.211	1460910	C18H24N0O0S0	18	24	0	0	0
244.079	1863048	C14H11N1O1S1	14	11	1	1	1
244.097	10755978	C14H11N1O3S0	14	11	1	3	0
244.1	2496907	C11H15N1O3S1	11	15	1	3	1
244.112	1438092	C18H11N1O0S0	18	11	1	0	0
244.116	7250828	C15H15N1O0S1	15	15	1	0	1
244.133	36703118	C15H15N1O2S0	15	15	1	2	0
244.137	14660495	C12H19N1O2S1	12	19	1	2	1
244.154	2477201	C12H19N1O4S0	12	19	1	4	0
244.17	49191827	C16H19N1O1S0	16	19	1	1	0
244.173	5853075	C13H23N1O1S1	13	23	1	1	1
244.191	5544341	C13H23N1O3S0	13	23	1	3	0
244.206	37747607	C17H23N1O0S0	17	23	1	0	0
244.209	1879703	C14H27N1O0S1	14	27	1	0	1
245.028	2674687	C13H6N0O3S1	13	6	0	3	1
245.063	1578756	C14H10N0O2S1	14	10	0	2	1
245.074	1301509	C13H10N2O1S1	13	10	2	1	1
245.081	4972550	C14H10N0O4S0	14	10	0	4	0
245.092	3156488	C13H10N2O3S0	13	10	2	3	0
245.1	4814857	C15H14N0O1S1	15	14	0	1	1
245.117	7992331	C15H14N0O3S0	15	14	0	3	0
245.121	3910156	C12H18N0O3S1	12	18	0	3	1
245.128	6316045	C14H14N2O2S0	14	14	2	2	0
245.154	7994384	C16H18N0O2S0	16	18	0	2	0
245.165	4268050	C15H18N2O1S0	15	18	2	1	0
245.19	2346901	C17H22N0O1S0	17	22	0	1	0
245.201	3220503	C16H22N2O0S0	16	22	2	0	0
246.058	1863833	C13H9N1O2S1	13	9	1	2	1
246.076	5212828	C13H9N1O4S0	13	9	1	4	0
246.095	5643935	C14H13N1O1S1	14	13	1	1	1
246.113	17235106	C14H13N1O3S0	14	13	1	3	0
246.116	1472546	C11H17N1O3S1	11	17	1	3	1
246.128	1282340	C18H13N1O0S0	18	13	1	0	0
246.131	8044709	C15H17N1O0S1	15	17	1	0	1
246.149	45247656	C15H17N1O2S0	15	17	1	2	0
246.152	3738792	C12H21N1O2S1	12	21	1	2	1
246.185	70057134	C16H21N1O1S0	16	21	1	1	0
246.222	47627444	C17H25N1O0S0	17	25	1	0	0
247.042	1760326	C13H8N0O3S1	13	8	0	3	1
247.054	2011976	C12H8N2O2S1	12	8	2	2	1
247.058	1505225	C17H8N0O0S1	17	8	0	0	1
247.06	1623369	C13H8N0O5S0	13	8	0	5	0
247.075	1324876	C17H8N0O2S0	17	8	0	2	0
247.079	1522957	C14H12N0O2S1	14	12	0	2	1
247.09	1888847	C13H12N2O1S1	13	12	2	1	1
247.097	5995856	C14H12N0O4S0	14	12	0	4	0
247.108	4234066	C13H12N2O3S0	13	12	2	3	0
247.112	2564179	C18H12N0O1S0	18	12	0	1	0
247.133	6840663	C15H16N0O3S0	15	16	0	3	0
247.136	1883736	C12H20N0O3S1	12	20	0	3	1
247.144	10366297	C14H16N2O2S0	14	16	2	2	0
247.148	3582810	C19H16N0O0S0	19	16	0	0	0
247.169	4211550	C16H20N0O2S0	16	20	0	2	0
247.181	3064928	C15H20N2O1S0	15	20	2	1	0
247.217	2080103	C16H24N2O0S0	16	24	2	0	0
248.038	1388432	C12H7N1O3S1	12	7	1	3	1
248.074	5250584	C13H11N1O2S1	13	11	1	2	1
248.092	5248539	C13H11N1O4S0	13	11	1	4	0
248.107	1668639	C17H11N1O1S0	17	11	1	1	0
248.11	6535711	C14H15N1O1S1	14	15	1	1	1
248.128	18990627	C14H15N1O3S0	14	15	1	3	0
248.132	4196388	C11H19N1O3S1	11	19	1	3	1
248.143	2911015	C18H15N1O0S0	18	15	1	0	0
248.147	33136167	C15H19N1O0S1	15	19	1	0	1
248.165	48688683	C15H19N1O2S0	15	19	1	2	0
248.201	80338483	C16H23N1O1S0	16	23	1	1	0
248.237	14167612	C17H27N1O0S0	17	27	1	0	0
249.021	1434098	C12H6N0O4S1	12	6	0	4	1
249.037	1316342	C16H6N0O1S1	16	6	0	1	1
249.056	1320699	C16H6N0O3S0	16	6	0	3	0
249.058	2682364	C13H10N0O3S1	13	10	0	3	1
249.069	6129406	C12H10N2O2S1	12	10	2	2	1
249.073	5383935	C17H10N0O0S1	17	10	0	0	1
249.076	2611712	C13H10N0O5S0	13	10	0	5	0
249.087	2494723	C12H10N2O4S0	12	10	2	4	0
249.091	3316996	C17H10N0O2S0	17	10	0	2	0
249.095	1922949	C14H14N0O2S1	14	14	0	2	1
249.102	2107142	C16H10N2O1S0	16	10	2	1	0
249.106	2471943	C13H14N2O1S1	13	14	2	1	1
249.112	5202697	C14H14N0O4S0	14	14	0	4	0
249.123	5955340	C13H14N2O3S0	13	14	2	3	0
249.127	5903629	C18H14N0O1S0	18	14	0	1	0
249.139	1360399	C17H14N2O0S0	17	14	2	0	0
249.149	5710610	C15H18N0O3S0	15	18	0	3	0
249.15	5891858	C12H22N0O3S1	12	22	0	3	1
249.16	6633237	C14H18N2O2S0	14	18	2	2	0
249.164	5314326	C19H18N0O0S0	19	18	0	0	0
249.185	2758939	C16H22N0O2S0	16	22	0	2	0
249.196	4992798	C15H22N2O1S0	15	22	2	1	0
249.232	2157095	C16H26N2O0S0	16	26	2	0	0
250.053	1665918	C12H9N1O3S1	12	9	1	3	1
250.086	1538823	C16H9N1O2S0	16	9	1	2	0
250.09	5844488	C13H13N1O2S1	13	13	1	2	1
250.107	7599116	C13H13N1O4S0	13	13	1	4	0
250.123	4867089	C17H13N1O1S0	17	13	1	1	0
250.126	16971794	C14H17N1O1S1	14	17	1	1	1
250.144	13771798	C14H17N1O3S0	14	17	1	3	0
250.159	4221979	C18H17N1O0S0	18	17	1	0	0
250.162	11174940	C15H21N1O0S1	15	21	1	0	1
250.18	21227552	C15H21N1O2S0	15	21	1	2	0
250.217	30826539	C16H25N1O1S0	16	25	1	1	0
250.253	1427509	C17H29N1O0S0	17	29	1	0	0
251.035	2354198	C15H4N0O4S0	15	4	0	4	0
251.037	2226199	C12H8N0O4S1	12	8	0	4	1
251.046	1429530	C14H4N2O3S0	14	4	2	3	0
251.049	1567770	C11H8N2O3S1	11	8	2	3	1
251.053	1836059	C16H8N0O1S1	16	8	0	1	1
251.07	2530337	C16H8N0O3S0	16	8	0	3	0
251.074	1811618	C13H12N0O3S1	13	12	0	3	1
251.085	3798821	C12H12N2O2S1	12	12	2	2	1
251.089	11610406	C17H12N0O0S1	17	12	0	0	1
251.091	2961703	C13H12N0O5S0	13	12	0	5	0
251.103	5929258	C12H12N2O4S0	12	12	2	4	0
251.107	7592236	C17H12N0O2S0	17	12	0	2	0
251.11	3126829	C14H16N0O2S1	14	16	0	2	1
251.118	4196143	C16H12N2O1S0	16	12	2	1	0
251.121	1478960	C13H16N2O1S1	13	16	2	1	1
251.128	4155698	C14H16N0O4S0	14	16	0	4	0
251.129	4169523	C11H20N0O4S1	11	20	0	4	1
251.139	3982133	C13H16N2O3S0	13	16	2	3	0
251.143	8125751	C18H16N0O1S0	18	16	0	1	0
251.154	7049530	C17H16N2O0S0	17	16	2	0	0
251.158	5781307	C14H20N2O0S1	14	20	2	0	1
251.164	2586429	C15H20N0O3S0	15	20	0	3	0
251.166	3118398	C12H24N0O3S1	12	24	0	3	1
251.175	4990272	C14H20N2O2S0	14	20	2	2	0
251.179	6090050	C19H20N0O0S0	19	20	0	0	0
251.212	3966795	C15H24N2O1S0	15	24	2	1	0
252.033	1427533	C11H7N1O4S1	11	7	1	4	1
252.067	1389400	C15H7N1O3S0	15	7	1	3	0
252.069	4472409	C12H11N1O3S1	12	11	1	3	1
252.084	1564766	C16H11N1O0S1	16	11	1	0	1
252.087	2315102	C12H11N1O5S0	12	11	1	5	0
252.087	2315102	C13H15N1O0S2	13	15	1	0	2
252.102	4272995	C16H11N1O2S0	16	11	1	2	0
252.105	7955045	C13H15N1O2S1	13	15	1	2	1
252.123	7970410	C13H15N1O4S0	13	15	1	4	0
252.138	7444079	C17H15N1O1S0	17	15	1	1	0
252.142	18018928	C14H19N1O1S1	14	19	1	1	1
252.159	11351670	C14H19N1O3S0	14	19	1	3	0
252.175	5951099	C18H19N1O0S0	18	19	1	0	0
252.178	3687548	C15H23N1O0S1	15	23	1	0	1
252.196	13470338	C15H23N1O2S0	15	23	1	2	0
252.232	5560462	C16H27N1O1S0	16	27	1	1	0
253.016	1431831	C11H6N0O5S1	11	6	0	5	1
253.051	2066852	C15H6N0O4S0	15	6	0	4	0
253.053	1282980	C12H10N0O4S1	12	10	0	4	1
253.064	1389224	C11H10N2O3S1	11	10	2	3	1
253.068	2822570	C16H10N0O1S1	16	10	0	1	1
253.086	3651504	C16H10N0O3S0	16	10	0	3	0
253.09	1380657	C13H14N0O3S1	13	14	0	3	1
253.097	2222260	C15H10N2O2S0	15	10	2	2	0
253.101	3349941	C12H14N2O2S1	12	14	2	2	1
253.105	11263926	C17H14N0O0S1	17	14	0	0	1
253.109	1870776	C10H18N0O5S1	10	18	0	5	1
253.118	3159483	C12H14N2O4S0	12	14	2	4	0
253.122	9003965	C17H14N0O2S0	17	14	0	2	0
253.126	3197886	C14H18N0O2S1	14	18	0	2	1
253.134	5017537	C16H14N2O1S0	16	14	2	1	0
253.137	2843074	C13H18N2O1S1	13	18	2	1	1
253.144	1913156	C14H18N0O4S0	14	18	0	4	0
253.145	3754437	C11H22N0O4S1	11	22	0	4	1
253.155	2345416	C13H18N2O3S0	13	18	2	3	0
253.159	7139273	C18H18N0O1S0	18	18	0	1	0
253.17	4787661	C17H18N2O0S0	17	18	2	0	0
253.173	28283855	C14H22N2O0S1	14	22	2	0	1
253.191	2962389	C14H22N2O2S0	14	22	2	2	0
253.195	5367766	C19H22N0O0S0	19	22	0	0	0
253.227	1806818	C15H26N2O1S0	15	26	2	1	0
254.048	1491723	C11H9N1O4S1	11	9	1	4	1
254.081	5261592	C15H9N1O3S0	15	9	1	3	0
254.085	4088089	C12H13N1O3S1	12	13	1	3	1
254.1	2036255	C16H13N1O0S1	16	13	1	0	1
254.102	4210464	C12H13N1O5S0	12	13	1	5	0
254.102	4210464	C13H17N1O0S2	13	17	1	0	2
254.118	13116709	C16H13N1O2S0	16	13	1	2	0
254.121	9092391	C13H17N1O2S1	13	17	1	2	1
254.139	6276397	C13H17N1O4S0	13	17	1	4	0
254.154	26211635	C17H17N1O1S0	17	17	1	1	0
254.157	22383924	C14H21N1O1S1	14	21	1	1	1
254.175	8255803	C14H21N1O3S0	14	21	1	3	0
254.19	36742465	C18H21N1O0S0	18	21	1	0	0
254.194	2538306	C15H25N1O0S1	15	25	1	0	1
254.212	8795464	C15H25N1O2S0	15	25	1	2	0
254.248	2243414	C16H29N1O1S0	16	29	1	1	0
255.032	1508740	C11H8N0O5S1	11	8	0	5	1
255.066	2134674	C15H8N0O4S0	15	8	0	4	0
255.077	1319318	C14H8N2O3S0	14	8	2	3	0
255.08	1417688	C11H12N2O3S1	11	12	2	3	1
255.084	2206873	C16H12N0O1S1	16	12	0	1	1
255.102	4396448	C16H12N0O3S0	16	12	0	3	0
255.113	4279973	C15H12N2O2S0	15	12	2	2	0
255.116	1747622	C12H16N2O2S1	12	16	2	2	1
255.12	2571944	C17H16N0O0S1	17	16	0	0	1
255.138	6492335	C17H16N0O2S0	17	16	0	2	0
255.141	1977520	C14H20N0O2S1	14	20	0	2	1
255.149	3178163	C16H16N2O1S0	16	16	2	1	0
255.152	2219188	C13H20N2O1S1	13	20	2	1	1
255.174	4151485	C18H20N0O1S0	18	20	0	1	0
255.178	4140222	C15H24N0O1S1	15	24	0	1	1
255.186	3875521	C17H20N2O0S0	17	20	2	0	0
255.189	2623171	C14H24N2O0S1	14	24	2	0	1
255.211	2698444	C19H24N0O0S0	19	24	0	0	0
256.06	1995302	C14H7N1O4S0	14	7	1	4	0
256.064	2369063	C11H11N1O4S1	11	11	1	4	1
256.079	1365806	C15H11N1O1S1	15	11	1	1	1
256.097	7078965	C15H11N1O3S0	15	11	1	3	0
256.1	4174902	C12H15N1O3S1	12	15	1	3	1
256.116	3412541	C16H15N1O0S1	16	15	1	0	1
256.118	1442750	C12H15N1O5S0	12	15	1	5	0
256.118	1442750	C13H19N1O0S2	13	19	1	0	2
256.133	31037508	C16H15N1O2S0	16	15	1	2	0
256.137	8006726	C13H19N1O2S1	13	19	1	2	1
256.154	3142733	C13H19N1O4S0	13	19	1	4	0
256.17	38447187	C17H19N1O1S0	17	19	1	1	0
256.173	25045077	C14H23N1O1S1	14	23	1	1	1
256.191	2802780	C14H23N1O3S0	14	23	1	3	0
256.206	28088419	C18H23N1O0S0	18	23	1	0	0
256.209	2093668	C15H27N1O0S1	15	27	1	0	1
256.227	4132972	C15H27N1O2S0	15	27	1	2	0
257.063	2080210	C15H10N0O2S1	15	10	0	2	1
257.076	1869784	C14H10N2O1S1	14	10	2	1	1
257.081	4666842	C15H10N0O4S0	15	10	0	4	0
257.092	2622943	C14H10N2O3S0	14	10	2	3	0
257.096	3269600	C11H14N2O3S1	11	14	2	3	1
257.1	6485986	C16H14N0O1S1	16	14	0	1	1
257.117	8418794	C16H14N0O3S0	16	14	0	3	0
257.121	3227115	C13H18N0O3S1	13	18	0	3	1
257.128	6591983	C15H14N2O2S0	15	14	2	2	0
257.154	9852410	C17H18N0O2S0	17	18	0	2	0
257.165	5757439	C16H18N2O1S0	16	18	2	1	0
257.19	3287562	C18H22N0O1S0	18	22	0	1	0
257.193	1376267	C15H26N0O1S1	15	26	0	1	1
257.201	4632079	C17H22N2O0S0	17	22	2	0	0
258.058	1526927	C14H9N1O2S1	14	9	1	2	1
258.076	2577303	C14H9N1O4S0	14	9	1	4	0
258.094	1469599	C15H13N1O1S1	15	13	1	1	1
258.112	8626088	C15H13N1O3S0	15	13	1	3	0
258.116	2335657	C12H17N1O3S1	12	17	1	3	1
258.131	4897712	C16H17N1O0S1	16	17	1	0	1
258.149	21353400	C16H17N1O2S0	16	17	1	2	0
258.152	8434618	C13H21N1O2S1	13	21	1	2	1
258.185	39037897	C17H21N1O1S0	17	21	1	1	0
258.189	1807562	C14H25N1O1S1	14	25	1	1	1
258.206	4075987	C14H25N1O3S0	14	25	1	3	0
258.222	21433306	C18H25N1O0S0	18	25	1	0	0
259.043	1709018	C14H8N0O3S1	14	8	0	3	1
259.058	2425185	C18H8N0O0S1	18	8	0	0	1
259.079	1806955	C15H12N0O2S1	15	12	0	2	1
259.09	1733488	C14H12N2O1S1	14	12	2	1	1
259.097	5384051	C15H12N0O4S0	15	12	0	4	0
259.1	1320053	C12H16N0O4S1	12	16	0	4	1
259.108	5049720	C14H12N2O3S0	14	12	2	3	0
259.112	2088314	C19H12N0O1S0	19	12	0	1	0
259.126	1979265	C15H16N2O0S1	15	16	2	0	1
259.133	10968452	C16H16N0O3S0	16	16	0	3	0
259.136	5257606	C13H20N0O3S1	13	20	0	3	1
259.144	10575242	C15H16N2O2S0	15	16	2	2	0
259.169	10280342	C17H20N0O2S0	17	20	0	2	0
259.181	7055771	C16H20N2O1S0	16	20	2	1	0
259.206	2364583	C18H24N0O1S0	18	24	0	1	0
259.217	5671341	C17H24N2O0S0	17	24	2	0	0
260.038	1953339	C13H7N1O3S1	13	7	1	3	1
260.072	1406028	C17H7N1O2S0	17	7	1	2	0
260.074	4391245	C14H11N1O2S1	14	11	1	2	1
260.092	8928086	C14H11N1O4S0	14	11	1	4	0
260.095	1476183	C11H15N1O4S1	11	15	1	4	1
260.107	1641565	C18H11N1O1S0	18	11	1	1	0
260.11	8036191	C15H15N1O1S1	15	15	1	1	1
260.128	18485096	C15H15N1O3S0	15	15	1	3	0
260.132	4034921	C12H19N1O3S1	12	19	1	3	1
260.143	1817711	C19H15N1O0S0	19	15	1	0	0
260.147	9406321	C16H19N1O0S1	16	19	1	0	1
260.165	46657402	C16H19N1O2S0	16	19	1	2	0
260.168	3353467	C13H23N1O2S1	13	23	1	2	1
260.201	43474828	C17H23N1O1S0	17	23	1	1	0
260.237	16977822	C18H27N1O0S0	18	27	1	0	0
261.058	1458170	C14H10N0O3S1	14	10	0	3	1
261.069	1984832	C13H10N2O2S1	13	10	2	2	1
261.073	2598466	C18H10N0O0S1	18	10	0	0	1
261.076	2187075	C14H10N0O5S0	14	10	0	5	0
261.087	2073417	C13H10N2O4S0	13	10	2	4	0
261.095	1763917	C15H14N0O2S1	15	14	0	2	1
261.112	3785558	C15H14N0O4S0	15	14	0	4	0
261.123	3898972	C14H14N2O3S0	14	14	2	3	0
261.127	1538782	C19H14N0O1S0	19	14	0	1	0
261.131	2206304	C16H18N0O1S1	16	18	0	1	1
261.148	3750761	C16H18N0O3S0	16	18	0	3	0
261.16	7998830	C15H18N2O2S0	15	18	2	2	0
261.164	2442864	C20H18N0O0S0	20	18	0	0	0
261.185	3610491	C17H22N0O2S0	17	22	0	2	0
261.196	3161473	C16H22N2O1S0	16	22	2	1	0
261.233	2543252	C17H26N2O0S0	17	26	2	0	0
262.053	2491197	C13H9N1O3S1	13	9	1	3	1
262.069	2031942	C17H9N1O0S1	17	9	1	0	1
262.071	1882951	C13H9N1O5S0	13	9	1	5	0
262.071	1882951	C14H13N1O0S2	14	13	1	0	2
262.086	1443279	C17H9N1O2S0	17	9	1	2	0
262.09	6085457	C14H13N1O2S1	14	13	1	2	1
262.107	8052570	C14H13N1O4S0	14	13	1	4	0
262.123	3129698	C18H13N1O1S0	18	13	1	1	0
262.126	9398116	C15H17N1O1S1	15	17	1	1	1
262.144	21582701	C15H17N1O3S0	15	17	1	3	0
262.147	3271535	C12H21N1O3S1	12	21	1	3	1
262.159	3008373	C19H17N1O0S0	19	17	1	0	0
262.162	34542455	C16H21N1O0S1	16	21	1	0	1
262.18	60380032	C16H21N1O2S0	16	21	1	2	0
262.217	65082259	C17H25N1O1S0	17	25	1	1	0
262.253	6707111	C18H29N1O0S0	18	29	1	0	0
263.037	1363145	C13H8N0O4S1	13	8	0	4	1
263.049	1843792	C12H8N2O3S1	12	8	2	3	1
263.053	1422162	C17H8N0O1S1	17	8	0	1	1
263.074	2963805	C14H12N0O3S1	14	12	0	3	1
263.082	1511777	C16H8N2O2S0	16	8	2	2	0
263.085	4918115	C13H12N2O2S1	13	12	2	2	1
263.089	10577253	C18H12N0O0S1	18	12	0	0	1
263.092	3434855	C14H12N0O5S0	14	12	0	5	0
263.093	1473896	C11H16N0O5S1	11	16	0	5	1
263.103	4446573	C13H12N2O4S0	13	12	2	4	0
263.107	3425135	C18H12N0O2S0	18	12	0	2	0
263.11	1684849	C15H16N0O2S1	15	16	0	2	1
263.118	1564789	C17H12N2O1S0	17	12	2	1	0
263.121	2950519	C14H16N2O1S1	14	16	2	1	1
263.128	5930362	C15H16N0O4S0	15	16	0	4	0
263.139	5908353	C14H16N2O3S0	14	16	2	3	0
263.143	5684611	C19H16N0O1S0	19	16	0	1	0
263.154	1628169	C18H16N2O0S0	18	16	2	0	0
263.158	1707659	C15H20N2O0S1	15	20	2	0	1
263.164	3920270	C16H20N0O3S0	16	20	0	3	0
263.166	5866895	C13H24N0O3S1	13	24	0	3	1
263.175	5790100	C15H20N2O2S0	15	20	2	2	0
263.18	4798870	C20H20N0O0S0	20	20	0	0	0
263.2	1400738	C17H24N0O2S0	17	24	0	2	0
263.212	5526440	C16H24N2O1S0	16	24	2	1	0
264.067	1810812	C16H7N1O3S0	16	7	1	3	0
264.069	4232062	C13H11N1O3S1	13	11	1	3	1
264.084	3116934	C17H11N1O0S1	17	11	1	0	1
264.087	3212936	C13H11N1O5S0	13	11	1	5	0
264.087	3212936	C14H15N1O0S2	14	15	1	0	2
264.102	2955408	C17H11N1O2S0	17	11	1	2	0
264.105	6350738	C14H15N1O2S1	14	15	1	2	1
264.123	11274140	C14H15N1O4S0	14	15	1	4	0
264.138	6560676	C18H15N1O1S0	18	15	1	1	0
264.142	20281254	C15H19N1O1S1	15	19	1	1	1
264.159	16875440	C15H19N1O3S0	15	19	1	3	0
264.174	3332280	C19H19N1O0S0	19	19	1	0	0
264.178	7709626	C16H23N1O0S1	16	23	1	0	1
264.196	15386564	C16H23N1O2S0	16	23	1	2	0
264.232	12125144	C17H27N1O1S0	17	27	1	1	0
265.05	1564196	C16H6N0O4S0	16	6	0	4	0
265.053	1466789	C13H10N0O4S1	13	10	0	4	1
265.064	1360555	C12H10N2O3S1	12	10	2	3	1
265.068	2833070	C17H10N0O1S1	17	10	0	1	1
265.086	2110648	C17H10N0O3S0	17	10	0	3	0
265.105	11903426	C18H14N0O0S1	18	14	0	0	1
265.107	1708228	C14H14N0O5S0	14	14	0	5	0
265.118	2937802	C13H14N2O4S0	13	14	2	4	0
265.122	3555789	C18H14N0O2S0	18	14	0	2	0
265.126	2203855	C15H18N0O2S1	15	18	0	2	1
265.134	2402515	C17H14N2O1S0	17	14	2	1	0
265.143	2316376	C15H18N0O4S0	15	18	0	4	0
265.145	3037145	C12H22N0O4S1	12	22	0	4	1
265.155	2629087	C14H18N2O3S0	14	18	2	3	0
265.159	4391393	C19H18N0O1S0	19	18	0	1	0
265.17	4042216	C18H18N2O0S0	18	18	2	0	0
265.173	1897706	C15H22N2O0S1	15	22	2	0	1
265.18	1568749	C16H22N0O3S0	16	22	0	3	0
265.181	1785070	C13H26N0O3S1	13	26	0	3	1
265.191	2300404	C15H22N2O2S0	15	22	2	2	0
265.195	3637750	C20H22N0O0S0	20	22	0	0	0
265.228	2709512	C16H26N2O1S0	16	26	2	1	0
266.048	2561247	C12H9N1O4S1	12	9	1	4	1
266.082	1308659	C16H9N1O3S0	16	9	1	3	0
266.085	5054452	C13H13N1O3S1	13	13	1	3	1
266.1	3781629	C17H13N1O0S1	17	13	1	0	1
266.102	3356158	C13H13N1O5S0	13	13	1	5	0
266.102	3356158	C14H17N1O0S2	14	17	1	0	2
266.118	11285511	C17H13N1O2S0	17	13	1	2	0
266.121	13650953	C14H17N1O2S1	14	17	1	2	1
266.139	15809555	C14H17N1O4S0	14	17	1	4	0
266.154	15326236	C18H17N1O1S0	18	17	1	1	0
266.157	26405918	C15H21N1O1S1	15	21	1	1	1
266.175	20118569	C15H21N1O3S0	15	21	1	3	0
266.19	10435633	C19H21N1O0S0	19	21	1	0	0
266.194	2724915	C16H25N1O0S1	16	25	1	0	1
266.212	17824830	C16H25N1O2S0	16	25	1	2	0
266.248	5258323	C17H29N1O1S0	17	29	1	1	0
267.047	1786406	C16H8N0O2S1	16	8	0	2	1
267.066	3643954	C16H8N0O4S0	16	8	0	4	0
267.069	2002227	C13H12N0O4S1	13	12	0	4	1
267.077	1625400	C15H8N2O3S0	15	8	2	3	0
267.08	2753594	C12H12N2O3S1	12	12	2	3	1
267.084	9396796	C17H12N0O1S1	17	12	0	1	1
267.098	2378820	C12H12N2O5S0	12	12	2	5	0
267.102	6531654	C17H12N0O3S0	17	12	0	3	0
267.105	2155336	C14H16N0O3S1	14	16	0	3	1
267.113	4909645	C16H12N2O2S0	16	12	2	2	0
267.116	3847759	C13H16N2O2S1	13	16	2	2	1
267.12	23133777	C18H16N0O0S1	18	16	0	0	1
267.124	3070548	C11H20N0O5S1	11	20	0	5	1
267.134	3290713	C13H16N2O4S0	13	16	2	4	0
267.138	11529820	C18H16N0O2S0	18	16	0	2	0
267.141	4568670	C15H20N0O2S1	15	20	0	2	1
267.149	5654114	C17H16N2O1S0	17	16	2	1	0
267.153	4461669	C14H20N2O1S1	14	20	2	1	1
267.159	1809000	C15H20N0O4S0	15	20	0	4	0
267.161	3430761	C12H24N0O4S1	12	24	0	4	1
267.17	6929007	C14H20N2O3S0	14	20	2	3	0
267.174	5813873	C19H20N0O1S0	19	20	0	1	0
267.186	3459192	C18H20N2O0S0	18	20	2	0	0
267.189	5680762	C15H24N2O0S1	15	24	2	0	1
267.207	2005892	C15H24N2O2S0	15	24	2	2	0
267.211	2918535	C20H24N0O0S0	20	24	0	0	0
268.025	1429483	C14H3N1O5S0	14	3	1	5	0
268.025	1429483	C15H7N1O0S2	15	7	1	0	2
268.064	2583939	C12H11N1O4S1	12	11	1	4	1
268.097	4556438	C16H11N1O3S0	16	11	1	3	0
268.1	3678360	C13H15N1O3S1	13	15	1	3	1
268.116	2336417	C17H15N1O0S1	17	15	1	0	1
268.118	3586211	C13H15N1O5S0	13	15	1	5	0
268.118	3586211	C14H19N1O0S2	14	19	1	0	2
268.133	14246060	C17H15N1O2S0	17	15	1	2	0
268.137	5299886	C14H19N1O2S1	14	19	1	2	1
268.154	4427449	C14H19N1O4S0	14	19	1	4	0
268.17	25452738	C18H19N1O1S0	18	19	1	1	0
268.173	9444548	C15H23N1O1S1	15	23	1	1	1
268.191	5395663	C15H23N1O3S0	15	23	1	3	0
268.206	21303512	C19H23N1O0S0	19	23	1	0	0
268.227	4711140	C16H27N1O2S0	16	27	1	2	0
268.264	1557754	C17H31N1O1S0	17	31	1	1	0
269.063	2454238	C16H10N0O2S1	16	10	0	2	1
269.081	2180585	C16H10N0O4S0	16	10	0	4	0
269.092	1363695	C15H10N2O3S0	15	10	2	3	0
269.095	1682546	C12H14N2O3S1	12	14	2	3	1
269.099	2746356	C17H14N0O1S1	17	14	0	1	1
269.117	4391935	C17H14N0O3S0	17	14	0	3	0
269.128	4606214	C16H14N2O2S0	16	14	2	2	0
269.132	1489160	C13H18N2O2S1	13	18	2	2	1
269.136	3668234	C18H18N0O0S1	18	18	0	0	1
269.154	6695189	C18H18N0O2S0	18	18	0	2	0
269.157	2383127	C15H22N0O2S1	15	22	0	2	1
269.165	4313884	C17H18N2O1S0	17	18	2	1	0
269.168	7303966	C14H22N2O1S1	14	22	2	1	1
269.186	1392937	C14H22N2O3S0	14	22	2	3	0
269.19	2850091	C19H22N0O1S0	19	22	0	1	0
269.193	6303533	C16H26N0O1S1	16	26	0	1	1
269.201	2619698	C18H22N2O0S0	18	22	2	0	0
269.226	1760705	C20H26N0O0S0	20	26	0	0	0
270.058	1407551	C15H9N1O2S1	15	9	1	2	1
270.076	1620810	C15H9N1O4S0	15	9	1	4	0
270.079	2189900	C12H13N1O4S1	12	13	1	4	1
270.095	2106198	C16H13N1O1S1	16	13	1	1	1
270.113	9008481	C16H13N1O3S0	16	13	1	3	0
270.116	3919715	C13H17N1O3S1	13	17	1	3	1
270.131	5328236	C17H17N1O0S1	17	17	1	0	1
270.134	3037038	C13H17N1O5S0	13	17	1	5	0
270.134	3037038	C14H21N1O0S2	14	21	1	0	2
270.149	33174903	C17H17N1O2S0	17	17	1	2	0
270.152	6749561	C14H21N1O2S1	14	21	1	2	1
270.17	2254980	C14H21N1O4S0	14	21	1	4	0
270.185	48817549	C18H21N1O1S0	18	21	1	1	0
270.189	7575952	C15H25N1O1S1	15	25	1	1	1
270.206	2650011	C15H25N1O3S0	15	25	1	3	0
270.222	20424100	C19H25N1O0S0	19	25	1	0	0
270.243	2022577	C16H29N1O2S0	16	29	1	2	0
271.042	2108832	C15H8N0O3S1	15	8	0	3	1
271.058	2378154	C19H8N0O0S1	19	8	0	0	1
271.071	1607603	C14H8N2O4S0	14	8	2	4	0
271.079	2485944	C16H12N0O2S1	16	12	0	2	1
271.09	1538111	C15H12N2O1S1	15	12	2	1	1
271.097	6520771	C16H12N0O4S0	16	12	0	4	0
271.1	2050245	C13H16N0O4S1	13	16	0	4	1
271.108	4326858	C15H12N2O3S0	15	12	2	3	0
271.111	3292620	C12H16N2O3S1	12	16	2	3	1
271.115	12365774	C17H16N0O1S1	17	16	0	1	1
271.129	1697751	C12H16N2O5S0	12	16	2	5	0
271.133	11149273	C17H16N0O3S0	17	16	0	3	0
271.136	4697051	C14H20N0O3S1	14	20	0	3	1
271.144	7464928	C16H16N2O2S0	16	16	2	2	0
271.148	1625570	C13H20N2O2S1	13	20	2	2	1
271.165	1675502	C13H20N2O4S0	13	20	2	4	0
271.169	9287664	C18H20N0O2S0	18	20	0	2	0
271.181	8779767	C17H20N2O1S0	17	20	2	1	0
271.206	2946567	C19H24N0O1S0	19	24	0	1	0
271.209	1353097	C16H28N0O1S1	16	28	0	1	1
271.217	4661262	C18H24N2O0S0	18	24	2	0	0
272.074	3749927	C15H11N1O2S1	15	11	1	2	1
272.092	5205554	C15H11N1O4S0	15	11	1	4	0
272.095	1516340	C12H15N1O4S1	12	15	1	4	1
272.11	2466878	C16H15N1O1S1	16	15	1	1	1
272.128	17275465	C16H15N1O3S0	16	15	1	3	0
272.132	2968139	C13H19N1O3S1	13	19	1	3	1
272.147	18219605	C17H19N1O0S1	17	19	1	0	1
272.165	31640160	C17H19N1O2S0	17	19	1	2	0
272.168	6884962	C14H23N1O2S1	14	23	1	2	1
272.201	78088823	C18H23N1O1S0	18	23	1	1	0
272.204	1590649	C15H27N1O1S1	15	27	1	1	1
272.22	1348099	C15H27N1O3S0	15	27	1	3	0
272.237	12380814	C19H27N1O0S0	19	27	1	0	0
273.059	1421333	C15H10N0O3S1	15	10	0	3	1
273.073	4381342	C19H10N0O0S1	19	10	0	0	1
273.076	2781344	C15H10N0O5S0	15	10	0	5	0
273.087	1697447	C14H10N2O4S0	14	10	2	4	0
273.094	1978539	C16H14N0O2S1	16	14	0	2	1
273.112	5041335	C16H14N0O4S0	16	14	0	4	0
273.123	3066046	C15H14N2O3S0	15	14	2	3	0
273.131	2846403	C17H18N0O1S1	17	18	0	1	1
273.148	5298894	C17H18N0O3S0	17	18	0	3	0
273.152	3207376	C14H22N0O3S1	14	22	0	3	1
273.16	6151893	C16H18N2O2S0	16	18	2	2	0
273.185	3872997	C18H22N0O2S0	18	22	0	2	0
273.196	4355820	C17H22N2O1S0	17	22	2	1	0
273.232	3930883	C18H26N2O0S0	18	26	2	0	0
274.053	3106574	C14H9N1O3S1	14	9	1	3	1
274.068	1474583	C18H9N1O0S1	18	9	1	0	1
274.071	2398489	C14H9N1O5S0	14	9	1	5	0
274.071	2398489	C15H13N1O0S2	15	13	1	0	2
274.09	2792485	C15H13N1O2S1	15	13	1	2	1
274.107	5875504	C15H13N1O4S0	15	13	1	4	0
274.126	4434492	C16H17N1O1S1	16	17	1	1	1
274.144	13926215	C16H17N1O3S0	16	17	1	3	0
274.147	2647882	C13H21N1O3S1	13	21	1	3	1
274.159	1472593	C20H17N1O0S0	20	17	1	0	0
274.162	8038227	C17H21N1O0S1	17	21	1	0	1
274.18	45670239	C17H21N1O2S0	17	21	1	2	0
274.217	43290486	C18H25N1O1S0	18	25	1	1	0
274.253	6883213	C19H29N1O0S0	19	29	1	0	0
275.052	1426317	C18H8N0O1S1	18	8	0	1	1
275.073	1415450	C15H12N0O3S1	15	12	0	3	1
275.085	2075554	C14H12N2O2S1	14	12	2	2	1
275.089	6241700	C19H12N0O0S1	19	12	0	0	1
275.092	3368358	C15H12N0O5S0	15	12	0	5	0
275.103	3181485	C14H12N2O4S0	14	12	2	4	0
275.107	1532336	C19H12N0O2S0	19	12	0	2	0
275.11	2244786	C16H16N0O2S1	16	16	0	2	1
275.128	4243389	C16H16N0O4S0	16	16	0	4	0
275.139	4584389	C15H16N2O3S0	15	16	2	3	0
275.143	2929095	C20H16N0O1S0	20	16	0	1	0
275.164	4807125	C17H20N0O3S0	17	20	0	3	0
275.166	1997014	C14H24N0O3S1	14	24	0	3	1
275.175	8645084	C16H20N2O2S0	16	20	2	2	0
275.18	1946846	C21H20N0O0S0	21	20	0	0	0
275.201	2752492	C18H24N0O2S0	18	24	0	2	0
275.212	5401075	C17H24N2O1S0	17	24	2	1	0
275.248	2390027	C18H28N2O0S0	18	28	2	0	0
276.067	1483033	C17H7N1O3S0	17	7	1	3	0
276.069	3924506	C14H11N1O3S1	14	11	1	3	1
276.084	3359268	C18H11N1O0S1	18	11	1	0	1
276.087	3371558	C14H11N1O5S0	14	11	1	5	0
276.087	3371558	C15H15N1O0S2	15	15	1	0	2
276.102	3248687	C18H11N1O2S0	18	11	1	2	0
276.105	8688689	C15H15N1O2S1	15	15	1	2	1
276.123	13151293	C15H15N1O4S0	15	15	1	4	0
276.127	1453119	C12H19N1O4S1	12	19	1	4	1
276.138	3472455	C19H15N1O1S0	19	15	1	1	0
276.142	9495625	C16H19N1O1S1	16	19	1	1	1
276.159	28304468	C16H19N1O3S0	16	19	1	3	0
276.163	3168343	C13H23N1O3S1	13	23	1	3	1
276.175	2517598	C20H19N1O0S0	20	19	1	0	0
276.178	24949856	C17H23N1O0S1	17	23	1	0	1
276.196	68564076	C17H23N1O2S0	17	23	1	2	0
276.232	42398851	C18H27N1O1S0	18	27	1	1	0
276.269	1853595	C19H31N1O0S0	19	31	1	0	0
277.018	1796221	C13H6N0O5S1	13	6	0	5	1
277.053	1519636	C14H10N0O4S1	14	10	0	4	1
277.064	2465691	C13H10N2O3S1	13	10	2	3	1
277.068	4266654	C18H10N0O1S1	18	10	0	1	1
277.08	1602981	C17H10N2O0S1	17	10	2	0	1
277.086	1360041	C18H10N0O3S0	18	10	0	3	0
277.089	1909419	C15H14N0O3S1	15	14	0	3	1
277.097	1616560	C17H10N2O2S0	17	10	2	2	0
277.101	3031731	C14H14N2O2S1	14	14	2	2	1
277.105	16244405	C19H14N0O0S1	19	14	0	0	1
277.107	3631287	C15H14N0O5S0	15	14	0	5	0
277.109	2097080	C12H18N0O5S1	12	18	0	5	1
277.118	5319358	C14H14N2O4S0	14	14	2	4	0
277.122	5548737	C19H14N0O2S0	19	14	0	2	0
277.126	2286531	C16H18N0O2S1	16	18	0	2	1
277.134	2078920	C18H14N2O1S0	18	14	2	1	0
277.137	2320074	C15H18N2O1S1	15	18	2	1	1
277.143	5142734	C16H18N0O4S0	16	18	0	4	0
277.145	1636559	C13H22N0O4S1	13	22	0	4	1
277.155	4549846	C15H18N2O3S0	15	18	2	3	0
277.159	5511896	C20H18N0O1S0	20	18	0	1	0
277.17	1542879	C19H18N2O0S0	19	18	2	0	0
277.173	1396194	C16H22N2O0S1	16	22	2	0	1
277.18	4222182	C17H22N0O3S0	17	22	0	3	0
277.181	3409127	C14H26N0O3S1	14	26	0	3	1
277.191	5438189	C16H22N2O2S0	16	22	2	2	0
277.195	2544368	C21H22N0O0S0	21	22	0	0	0
277.228	3085572	C17H26N2O1S0	17	26	2	1	0
278.048	2779926	C13H9N1O4S1	13	9	1	4	1
278.064	1855776	C17H9N1O1S1	17	9	1	1	1
278.082	1662636	C17H9N1O3S0	17	9	1	3	0
278.085	4697901	C14H13N1O3S1	14	13	1	3	1
278.1	8278327	C18H13N1O0S1	18	13	1	0	1
278.102	4996921	C14H13N1O5S0	14	13	1	5	0
278.102	4996921	C15H17N1O0S2	15	17	1	0	2
278.118	7553346	C18H13N1O2S0	18	13	1	2	0
278.121	8520005	C15H17N1O2S1	15	17	1	2	1
278.139	16578896	C15H17N1O4S0	15	17	1	4	0
278.154	6355290	C19H17N1O1S0	19	17	1	1	0
278.157	15020380	C16H21N1O1S1	16	21	1	1	1
278.175	20715879	C16H21N1O3S0	16	21	1	3	0
278.19	3288433	C20H21N1O0S0	20	21	1	0	0
278.194	7492979	C17H25N1O0S1	17	25	1	0	1
278.211	20248959	C17H25N1O2S0	17	25	1	2	0
278.248	8186262	C18H29N1O1S0	18	29	1	1	0
279.031	1471247	C13H8N0O5S1	13	8	0	5	1
279.066	1875110	C17H8N0O4S0	17	8	0	4	0
279.069	1756711	C14H12N0O4S1	14	12	0	4	1
279.076	1359020	C16H8N2O3S0	16	8	2	3	0
279.08	3261871	C13H12N2O3S1	13	12	2	3	1
279.084	7604145	C18H12N0O1S1	18	12	0	1	1
279.098	2063290	C13H12N2O5S0	13	12	2	5	0
279.102	3207613	C18H12N0O3S0	18	12	0	3	0
279.105	1485631	C15H16N0O3S1	15	16	0	3	1
279.113	1841348	C17H12N2O2S0	17	12	2	2	0
279.116	3352006	C14H16N2O2S1	14	16	2	2	1
279.12	23374793	C19H16N0O0S1	19	16	0	0	1
279.123	1487050	C15H16N0O5S0	15	16	0	5	0
279.134	3585489	C14H16N2O4S0	14	16	2	4	0
279.138	5058516	C19H16N0O2S0	19	16	0	2	0
279.142	2102231	C16H20N0O2S1	16	20	0	2	1
279.149	2800603	C18H16N2O1S0	18	16	2	1	0
279.152	1836765	C15H20N2O1S1	15	20	2	1	1
279.16	1671138	C16H20N0O4S0	16	20	0	4	0
279.17	1808873	C15H20N2O3S0	15	20	2	3	0
279.174	2252523	C20H20N0O1S0	20	20	0	1	0
279.186	2309107	C19H20N2O0S0	19	20	2	0	0
279.197	1369466	C17H24N0O3S0	17	24	0	3	0
279.197	1369466	C14H28N0O3S1	14	28	0	3	1
279.207	1795840	C16H24N2O2S0	16	24	2	2	0
279.21	1437315	C21H24N0O0S0	21	24	0	0	0
279.243	1770008	C17H28N2O1S0	17	28	2	1	0
280.064	1794087	C13H11N1O4S1	13	11	1	4	1
280.097	2358333	C17H11N1O3S0	17	11	1	3	0
280.1	2478399	C14H15N1O3S1	14	15	1	3	1
280.115	3018825	C18H15N1O0S1	18	15	1	0	1
280.118	3263050	C14H15N1O5S0	14	15	1	5	0
280.118	3263050	C15H19N1O0S2	15	19	1	0	2
280.133	8115796	C18H15N1O2S0	18	15	1	2	0
280.137	6309462	C15H19N1O2S1	15	19	1	2	1
280.154	8315490	C15H19N1O4S0	15	19	1	4	0
280.17	9296491	C19H19N1O1S0	19	19	1	1	0
280.173	10843758	C16H23N1O1S1	16	23	1	1	1
280.191	10607225	C16H23N1O3S0	16	23	1	3	0
280.206	6011523	C20H23N1O0S0	20	23	1	0	0
280.209	1454725	C17H27N1O0S1	17	27	1	0	1
280.227	8066704	C17H27N1O2S0	17	27	1	2	0
280.264	1399720	C18H31N1O1S0	18	31	1	1	0
281.063	1824680	C17H10N0O2S1	17	10	0	2	1
281.082	1704884	C17H10N0O4S0	17	10	0	4	0
281.095	1987773	C13H14N2O3S1	13	14	2	3	1
281.099	12114111	C18H14N0O1S1	18	14	0	1	1
281.117	5102283	C18H14N0O3S0	18	14	0	3	0
281.129	2635986	C17H14N2O2S0	17	14	2	2	0
281.136	14237911	C19H18N0O0S1	19	18	0	0	1
281.15	2765535	C14H18N2O4S0	14	18	2	4	0
281.154	4972258	C19H18N0O2S0	19	18	0	2	0
281.157	3265252	C16H22N0O2S1	16	22	0	2	1
281.165	3979497	C18H18N2O1S0	18	18	2	1	0
281.168	3044587	C15H22N2O1S1	15	22	2	1	1
281.176	2366449	C13H26N0O4S1	13	26	0	4	1
281.186	1407862	C15H22N2O3S0	15	22	2	3	0
281.19	2876665	C20H22N0O1S0	20	22	0	1	0
281.201	2137344	C19H22N2O0S0	19	22	2	0	0
281.205	1567490	C16H26N2O0S1	16	26	2	0	1
281.222	1835278	C16H26N2O2S0	16	26	2	2	0
282.076	1453486	C16H9N1O4S0	16	9	1	4	0
282.08	1936944	C13H13N1O4S1	13	13	1	4	1
282.095	2233146	C17H13N1O1S1	17	13	1	1	1
282.113	7260997	C17H13N1O3S0	17	13	1	3	0
282.116	5738823	C14H17N1O3S1	14	17	1	3	1
282.131	2111313	C18H17N1O0S1	18	17	1	0	1
282.134	4016979	C14H17N1O5S0	14	17	1	5	0
282.134	4016979	C15H21N1O0S2	15	21	1	0	2
282.149	26116956	C18H17N1O2S0	18	17	1	2	0
282.152	5713759	C15H21N1O2S1	15	21	1	2	1
282.17	4973930	C15H21N1O4S0	15	21	1	4	0
282.185	36406132	C19H21N1O1S0	19	21	1	1	0
282.189	6998902	C16H25N1O1S1	16	25	1	1	1
282.206	6268801	C16H25N1O3S0	16	25	1	3	0
282.222	17965963	C20H25N1O0S0	20	25	1	0	0
282.243	3695000	C17H29N1O2S0	17	29	1	2	0
283.079	4308394	C17H12N0O2S1	17	12	0	2	1
283.097	4402613	C17H12N0O4S0	17	12	0	4	0
283.108	2864572	C16H12N2O3S0	16	12	2	3	0
283.111	2550718	C13H16N2O3S1	13	16	2	3	1
283.115	6966720	C18H16N0O1S1	18	16	0	1	1
283.126	1396423	C17H16N2O0S1	17	16	2	0	1
283.129	1517769	C13H16N2O5S0	13	16	2	5	0
283.133	7140812	C18H16N0O3S0	18	16	0	3	0
283.136	3695566	C15H20N0O3S1	15	20	0	3	1
283.144	6479315	C17H16N2O2S0	17	16	2	2	0
283.148	1734613	C14H20N2O2S1	14	20	2	2	1
283.156	1598938	C12H24N0O5S1	12	24	0	5	1
283.165	1351392	C14H20N2O4S0	14	20	2	4	0
283.169	8075747	C19H20N0O2S0	19	20	0	2	0
283.173	1932773	C16H24N0O2S1	16	24	0	2	1
283.181	8358378	C18H20N2O1S0	18	20	2	1	0
283.184	3046892	C15H24N2O1S1	15	24	2	1	1
283.202	2097911	C15H24N2O3S0	15	24	2	3	0
283.206	3134969	C20H24N0O1S0	20	24	0	1	0
283.217	3515905	C19H24N2O0S0	19	24	2	0	0
284.053	1450510	C19H7N1O0S1	19	7	1	0	1
284.074	2190235	C16H11N1O2S1	16	11	1	2	1
284.092	4499494	C16H11N1O4S0	16	11	1	4	0
284.095	2940456	C13H15N1O4S1	13	15	1	4	1
284.111	3174962	C17H15N1O1S1	17	15	1	1	1
284.128	15028285	C17H15N1O3S0	17	15	1	3	0
284.132	5007423	C14H19N1O3S1	14	19	1	3	1
284.147	7444552	C18H19N1O0S1	18	19	1	0	1
284.149	3537482	C14H19N1O5S0	14	19	1	5	0
284.149	3537482	C15H23N1O0S2	15	23	1	0	2
284.165	43878484	C18H19N1O2S0	18	19	1	2	0
284.168	5248086	C15H23N1O2S1	15	23	1	2	1
284.186	2721377	C15H23N1O4S0	15	23	1	4	0
284.201	47835242	C19H23N1O1S0	19	23	1	1	0
284.204	2544748	C16H27N1O1S1	16	27	1	1	1
284.222	2354295	C16H27N1O3S0	16	27	1	3	0
284.237	12365953	C20H27N1O0S0	20	27	1	0	0
285.058	2394751	C16H10N0O3S1	16	10	0	3	1
285.069	1958278	C15H10N2O2S1	15	10	2	2	1
285.073	5924489	C20H10N0O0S1	20	10	0	0	1
285.087	2250385	C15H10N2O4S0	15	10	2	4	0
285.094	2545558	C17H14N0O2S1	17	14	0	2	1
285.107	2201758	C16H14N2O1S1	16	14	2	1	1
285.112	5057697	C17H14N0O4S0	17	14	0	4	0
285.123	6159016	C16H14N2O3S0	16	14	2	3	0
285.127	1471402	C13H18N2O3S1	13	18	2	3	1
285.131	4652204	C18H18N0O1S1	18	18	0	1	1
285.149	10142391	C18H18N0O3S0	18	18	0	3	0
285.152	6441657	C15H22N0O3S1	15	22	0	3	1
285.16	7644862	C17H18N2O2S0	17	18	2	2	0
285.163	4274368	C14H22N2O2S1	14	22	2	2	1
285.181	1410251	C14H22N2O4S0	14	22	2	4	0
285.185	6492878	C19H22N0O2S0	19	22	0	2	0
285.196	9816789	C18H22N2O1S0	18	22	2	1	0
285.221	1349348	C20H26N0O1S0	20	26	0	1	0
285.233	5641963	C19H26N2O0S0	19	26	2	0	0
286.053	1747684	C15H9N1O3S1	15	9	1	3	1
286.069	3110637	C19H9N1O0S1	19	9	1	0	1
286.071	1687535	C15H9N1O5S0	15	9	1	5	0
286.071	1687535	C16H13N1O0S2	16	13	1	0	2
286.09	4187898	C16H13N1O2S1	16	13	1	2	1
286.107	10974469	C16H13N1O4S0	16	13	1	4	0
286.111	2287879	C13H17N1O4S1	13	17	1	4	1
286.126	4878608	C17H17N1O1S1	17	17	1	1	1
286.144	22310171	C17H17N1O3S0	17	17	1	3	0
286.147	3128605	C14H21N1O3S1	14	21	1	3	1
286.162	29130023	C18H21N1O0S1	18	21	1	0	1
286.165	1555752	C15H25N1O0S2	15	25	1	0	2
286.18	44797233	C18H21N1O2S0	18	21	1	2	0
286.184	6473011	C15H25N1O2S1	15	25	1	2	1
286.2	1773885	C15H25N1O4S0	15	25	1	4	0
286.217	60247368	C19H25N1O1S0	19	25	1	1	0
286.253	7006558	C20H29N1O0S0	20	29	1	0	0
287.038	1398458	C15H8N0O4S1	15	8	0	4	1
287.053	2127683	C19H8N0O1S1	19	8	0	1	1
287.064	1701706	C18H8N2O0S1	18	8	2	0	1
287.073	1538639	C16H12N0O3S1	16	12	0	3	1
287.085	1775446	C15H12N2O2S1	15	12	2	2	1
287.089	8715097	C20H12N0O0S1	20	12	0	0	1
287.103	3063137	C15H12N2O4S0	15	12	2	4	0
287.11	3704166	C17H16N0O2S1	17	16	0	2	1
287.121	1937004	C16H16N2O1S1	16	16	2	1	1
287.128	5739376	C17H16N0O4S0	17	16	0	4	0
287.139	5463927	C16H16N2O3S0	16	16	2	3	0
287.143	2112377	C21H16N0O1S0	21	16	0	1	0
287.147	5886843	C18H20N0O1S1	18	20	0	1	1
287.164	7270278	C18H20N0O3S0	18	20	0	3	0
287.166	4987783	C15H24N0O3S1	15	24	0	3	1
287.175	7296909	C17H20N2O2S0	17	20	2	2	0
287.201	3812252	C19H24N0O2S0	19	24	0	2	0
287.212	4547491	C18H24N2O1S0	18	24	2	1	0
287.248	5539769	C19H28N2O0S0	19	28	2	0	0
288.069	4559267	C15H11N1O3S1	15	11	1	3	1
288.084	3993004	C19H11N1O0S1	19	11	1	0	1
288.087	3183278	C15H11N1O5S0	15	11	1	5	0
288.087	3183278	C16H15N1O0S2	16	15	1	0	2
288.105	4452281	C16H15N1O2S1	16	15	1	2	1
288.123	11227587	C16H15N1O4S0	16	15	1	4	0
288.127	1901509	C13H19N1O4S1	13	19	1	4	1
288.138	1676748	C20H15N1O1S0	20	15	1	1	0
288.142	7502286	C17H19N1O1S1	17	19	1	1	1
288.159	18483673	C17H19N1O3S0	17	19	1	3	0
288.163	2216155	C14H23N1O3S1	14	23	1	3	1
288.175	2141154	C21H19N1O0S0	21	19	1	0	0
288.178	10085860	C18H23N1O0S1	18	23	1	0	1
288.196	68588014	C18H23N1O2S0	18	23	1	2	0
288.232	25231876	C19H27N1O1S0	19	27	1	1	0
288.269	2756121	C20H31N1O0S0	20	31	1	0	0
289.053	1487335	C15H10N0O4S1	15	10	0	4	1
289.064	2406381	C14H10N2O3S1	14	10	2	3	1
289.068	3519983	C19H10N0O1S1	19	10	0	1	1
289.079	1563894	C18H10N2O0S1	18	10	2	0	1
289.082	1958135	C14H10N2O5S0	14	10	2	5	0
289.087	1567738	C19H10N0O3S0	19	10	0	3	0
289.089	1971452	C16H14N0O3S1	16	14	0	3	1
289.101	1979906	C15H14N2O2S1	15	14	2	2	1
289.105	11756549	C20H14N0O0S1	20	14	0	0	1
289.107	3123206	C16H14N0O5S0	16	14	0	5	0
289.118	2796045	C15H14N2O4S0	15	14	2	4	0
289.122	1427663	C20H14N0O2S0	20	14	0	2	0
289.126	4215313	C17H18N0O2S1	17	18	0	2	1
289.143	3999771	C17H18N0O4S0	17	18	0	4	0
289.155	5022754	C16H18N2O3S0	16	18	2	3	0
289.159	2368548	C21H18N0O1S0	21	18	0	1	0
289.18	2264369	C18H22N0O3S0	18	22	0	3	0
289.182	1769010	C15H26N0O3S1	15	26	0	3	1
289.191	4828215	C17H22N2O2S0	17	22	2	2	0
289.228	2515020	C18H26N2O1S0	18	26	2	1	0
289.264	1596130	C19H30N2O0S0	19	30	2	0	0
290.048	1364007	C14H9N1O4S1	14	9	1	4	1
290.085	4422204	C15H13N1O3S1	15	13	1	3	1
290.1	2499141	C19H13N1O0S1	19	13	1	0	1
290.102	4078150	C15H13N1O5S0	15	13	1	5	0
290.102	4078150	C16H17N1O0S2	16	17	1	0	2
290.118	3743823	C19H13N1O2S0	19	13	1	2	0
290.121	4691537	C16H17N1O2S1	16	17	1	2	1
290.139	11062875	C16H17N1O4S0	16	17	1	4	0
290.154	2258084	C20H17N1O1S0	20	17	1	1	0
290.157	5788262	C17H21N1O1S1	17	21	1	1	1
290.175	16854640	C17H21N1O3S0	17	21	1	3	0
290.194	7166587	C18H25N1O0S1	18	25	1	0	1
290.211	39941765	C18H25N1O2S0	18	25	1	2	0
290.248	11195034	C19H29N1O1S0	19	29	1	1	0
291.066	1446251	C18H8N0O4S0	18	8	0	4	0
291.069	1624813	C15H12N0O4S1	15	12	0	4	1
291.08	1677427	C14H12N2O3S1	14	12	2	3	1
291.084	3957110	C19H12N0O1S1	19	12	0	1	1
291.095	3128956	C18H12N2O0S1	18	12	2	0	1
291.097	1906557	C14H12N2O5S0	14	12	2	5	0
291.102	1497344	C19H12N0O3S0	19	12	0	3	0
291.105	1382913	C16H16N0O3S1	16	16	0	3	1
291.116	2743944	C15H16N2O2S1	15	16	2	2	1
291.12	14151818	C20H16N0O0S1	20	16	0	0	1
291.122	2960011	C16H16N0O5S0	16	16	0	5	0
291.134	2603154	C15H16N2O4S0	15	16	2	4	0
291.138	2797844	C20H16N0O2S0	20	16	0	2	0
291.142	1693078	C17H20N0O2S1	17	20	0	2	1
291.161	1430433	C17H20N0O4S0	17	20	0	4	0
291.161	1430433	C14H24N0O4S1	14	24	0	4	1
291.17	2260518	C16H20N2O3S0	16	20	2	3	0
291.174	2444713	C21H20N0O1S0	21	20	0	1	0
291.197	1966773	C18H24N0O3S0	18	24	0	3	0
291.207	2269883	C17H24N2O2S0	17	24	2	2	0
291.243	1420751	C18H28N2O1S0	18	28	2	1	0
292.064	2715034	C14H11N1O4S1	14	11	1	4	1
292.079	2003363	C18H11N1O1S1	18	11	1	1	1
292.097	1669421	C18H11N1O3S0	18	11	1	3	0
292.1	2921134	C15H15N1O3S1	15	15	1	3	1
292.116	5699255	C19H15N1O0S1	19	15	1	0	1
292.118	4018872	C15H15N1O5S0	15	15	1	5	0
292.118	4018872	C16H19N1O0S2	16	19	1	0	2
292.133	6283969	C19H15N1O2S0	19	15	1	2	0
292.137	4437187	C16H19N1O2S1	16	19	1	2	1
292.154	10368716	C16H19N1O4S0	16	19	1	4	0
292.169	4472533	C20H19N1O1S0	20	19	1	1	0
292.173	6463191	C17H23N1O1S1	17	23	1	1	1
292.191	15045345	C17H23N1O3S0	17	23	1	3	0
292.206	1810665	C21H23N1O0S0	21	23	1	0	0
292.209	3047147	C18H27N1O0S1	18	27	1	0	1
292.227	11128565	C18H27N1O2S0	18	27	1	2	0
292.264	2935561	C19H31N1O1S0	19	31	1	1	0
293.082	1674954	C18H10N0O4S0	18	10	0	4	0
293.084	1759180	C15H14N0O4S1	15	14	0	4	1
293.095	1883858	C14H14N2O3S1	14	14	2	3	1
293.099	8106196	C19H14N0O1S1	19	14	0	1	1
293.113	1759195	C14H14N2O5S0	14	14	2	5	0
293.117	2490846	C19H14N0O3S0	19	14	0	3	0
293.129	1417060	C18H14N2O2S0	18	14	2	2	0
293.131	1651429	C15H18N2O2S1	15	18	2	2	1
293.136	20284648	C20H18N0O0S1	20	18	0	0	1
293.149	2492655	C15H18N2O4S0	15	18	2	4	0
293.154	3067122	C20H18N0O2S0	20	18	0	2	0
293.165	2539256	C19H18N2O1S0	19	18	2	1	0
293.186	2254339	C16H22N2O3S0	16	22	2	3	0
293.19	1512837	C21H22N0O1S0	21	22	0	1	0
293.201	1830155	C20H22N2O0S0	20	22	2	0	0
293.205	1368845	C17H26N2O0S1	17	26	2	0	1
293.213	1379858	C15H30N0O3S1	15	30	0	3	1
293.222	1709591	C17H26N2O2S0	17	26	2	2	0
293.259	1941035	C18H30N2O1S0	18	30	2	1	0
294.079	1574629	C14H13N1O4S1	14	13	1	4	1
294.095	1681902	C18H13N1O1S1	18	13	1	1	1
294.097	1538799	C14H13N1O6S0	14	13	1	6	0
294.112	3413239	C18H13N1O3S0	18	13	1	3	0
294.116	3296249	C15H17N1O3S1	15	17	1	3	1
294.131	2289409	C19H17N1O0S1	19	17	1	0	1
294.133	3005186	C15H17N1O5S0	15	17	1	5	0
294.133	3005186	C16H21N1O0S2	16	21	1	0	2
294.149	10776330	C19H17N1O2S0	19	17	1	2	0
294.152	4517132	C16H21N1O2S1	16	21	1	2	1
294.17	7219990	C16H21N1O4S0	16	21	1	4	0
294.185	10348318	C20H21N1O1S0	20	21	1	1	0
294.189	7107360	C17H25N1O1S1	17	25	1	1	1
294.206	9797417	C17H25N1O3S0	17	25	1	3	0
294.222	3440433	C21H25N1O0S0	21	25	1	0	0
294.243	5333821	C18H29N1O2S0	18	29	1	2	0
295.079	3707639	C18H12N0O2S1	18	12	0	2	1
295.097	1794945	C18H12N0O4S0	18	12	0	4	0
295.111	1774600	C14H16N2O3S1	14	16	2	3	1
295.115	14123274	C19H16N0O1S1	19	16	0	1	1
295.133	3467028	C19H16N0O3S0	19	16	0	3	0
295.144	3667737	C18H16N2O2S0	18	16	2	2	0
295.151	8364317	C20H20N0O0S1	20	20	0	0	1
295.165	1606693	C15H20N2O4S0	15	20	2	4	0
295.169	3369767	C20H20N0O2S0	20	20	0	2	0
295.173	1746473	C17H24N0O2S1	17	24	0	2	1
295.18	3288877	C19H20N2O1S0	19	20	2	1	0
295.192	1871923	C14H28N0O4S1	14	28	0	4	1
295.202	1451832	C16H24N2O3S0	16	24	2	3	0
295.206	1643962	C21H24N0O1S0	21	24	0	1	0
296.092	1424262	C17H11N1O4S0	17	11	1	4	0
296.095	2673416	C14H15N1O4S1	14	15	1	4	1
296.128	6129433	C18H15N1O3S0	18	15	1	3	0
296.131	2902299	C15H19N1O3S1	15	19	1	3	1
296.147	2603298	C19H19N1O0S1	19	19	1	0	1
296.149	3161380	C15H19N1O5S0	15	19	1	5	0
296.149	3161380	C16H23N1O0S2	16	23	1	0	2
296.164	26633004	C19H19N1O2S0	19	19	1	2	0
296.168	3585325	C16H23N1O2S1	16	23	1	2	1
296.186	2693686	C16H23N1O4S0	16	23	1	4	0
296.201	23749438	C20H23N1O1S0	20	23	1	1	0
296.204	3183424	C17H27N1O1S1	17	27	1	1	1
296.222	2245961	C17H27N1O3S0	17	27	1	3	0
296.237	5605201	C21H27N1O0S0	21	27	1	0	0
297.058	1537267	C17H10N0O3S1	17	10	0	3	1
297.094	4395781	C18H14N0O2S1	18	14	0	2	1
297.112	2069262	C18H14N0O4S0	18	14	0	4	0
297.123	2126868	C17H14N2O3S0	17	14	2	3	0
297.131	4241176	C19H18N0O1S1	19	18	0	1	1
297.149	3561249	C19H18N0O3S0	19	18	0	3	0
297.152	2588962	C16H22N0O3S1	16	22	0	3	1
297.16	3923750	C18H18N2O2S0	18	18	2	2	0
297.163	1444648	C15H22N2O2S1	15	22	2	2	1
297.185	3659571	C20H22N0O2S0	20	22	0	2	0
297.196	6206777	C19H22N2O1S0	19	22	2	1	0
297.233	2210379	C20H26N2O0S0	20	26	2	0	0
298.071	1416429	C16H9N1O5S0	16	9	1	5	0
298.071	1416429	C17H13N1O0S2	17	13	1	0	2
298.09	1910518	C17H13N1O2S1	17	13	1	2	1
298.107	3472127	C17H13N1O4S0	17	13	1	4	0
298.111	1876993	C14H17N1O4S1	14	17	1	4	1
298.144	9435921	C18H17N1O3S0	18	17	1	3	0
298.147	1717779	C15H21N1O3S1	15	21	1	3	1
298.162	2855706	C19H21N1O0S1	19	21	1	0	1
298.165	2160924	C15H21N1O5S0	15	21	1	5	0
298.165	2160924	C16H25N1O0S2	16	25	1	0	2
298.18	31737635	C19H21N1O2S0	19	21	1	2	0
298.184	2158373	C16H25N1O2S1	16	25	1	2	1
298.217	27060021	C20H25N1O1S0	20	25	1	1	0
298.253	3830599	C21H29N1O0S0	21	29	1	0	0
299.073	1514328	C17H12N0O3S1	17	12	0	3	1
299.089	3201759	C21H12N0O0S1	21	12	0	0	1
299.103	1565542	C16H12N2O4S0	16	12	2	4	0
299.11	3529962	C18H16N0O2S1	18	16	0	2	1
299.128	2509298	C18H16N0O4S0	18	16	0	4	0
299.139	2408696	C17H16N2O3S0	17	16	2	3	0
299.164	3823364	C19H20N0O3S0	19	20	0	3	0
299.167	3899653	C16H24N0O3S1	16	24	0	3	1
299.175	3583753	C18H20N2O2S0	18	20	2	2	0
299.201	2322453	C20H24N0O2S0	20	24	0	2	0
299.212	5242651	C19H24N2O1S0	19	24	2	1	0
299.248	5176620	C20H28N2O0S0	20	28	2	0	0
300.069	1446325	C16H11N1O3S1	16	11	1	3	1
300.084	1833148	C20H11N1O0S1	20	11	1	0	1
300.105	3076294	C17H15N1O2S1	17	15	1	2	1
300.123	5647566	C17H15N1O4S0	17	15	1	4	0
300.142	2327255	C18H19N1O1S1	18	19	1	1	1
300.159	11814623	C18H19N1O3S0	18	19	1	3	0
300.163	1825249	C15H23N1O3S1	15	23	1	3	1
300.178	15078120	C19H23N1O0S1	19	23	1	0	1
300.196	35859184	C19H23N1O2S0	19	23	1	2	0
300.199	1992946	C16H27N1O2S1	16	27	1	2	1
300.232	19876610	C20H27N1O1S0	20	27	1	1	0
300.269	2718483	C21H31N1O0S0	21	31	1	0	0
301.068	2169480	C20H10N0O1S1	20	10	0	1	1
301.089	1442834	C17H14N0O3S1	17	14	0	3	1
301.1	1397911	C16H14N2O2S1	16	14	2	2	1
301.105	5930137	C21H14N0O0S1	21	14	0	0	1
301.107	1803675	C17H14N0O5S0	17	14	0	5	0
301.119	1473440	C16H14N2O4S0	16	14	2	4	0
301.126	2332835	C18H18N0O2S1	18	18	0	2	1
301.143	2562731	C18H18N0O4S0	18	18	0	4	0
301.154	3187376	C17H18N2O3S0	17	18	2	3	0
301.162	4358836	C19H22N0O1S1	19	22	0	1	1
301.181	3053757	C19H22N0O3S0	19	22	0	3	0
301.183	1594558	C16H26N0O3S1	16	26	0	3	1
301.191	4674753	C18H22N2O2S0	18	22	2	2	0
301.228	3725010	C19H26N2O1S0	19	26	2	1	0
301.264	2032739	C20H30N2O0S0	20	30	2	0	0
302.048	1473353	C15H9N1O4S1	15	9	1	4	1
[truncated: 1,097 more rows]

## Sheet: RWDOM-(+)APPI
m/z	intensity	Formula	C	H	N	O	S
129.07	24318688	C10H6N0O0S0	10	6	0	0	0
131.085	30073890	C10H8N0O0S0	10	8	0	0	0
132.081	3148029	C9H7N1O0S0	9	7	1	0	0
133.065	6325277	C9H6N0O1S0	9	6	0	1	0
133.101	21944181	C10H10N0O0S0	10	10	0	0	0
134.06	4758881	C8H5N1O1S0	8	5	1	1	0
134.096	6768164	C9H9N1O0S0	9	9	1	0	0
135.026	3995534	C8H4N0O0S1	8	4	0	0	1
135.08	7788207	C9H8N0O1S0	9	8	0	1	0
136.076	3791455	C8H7N1O1S0	8	7	1	1	0
137.042	3133782	C8H6N0O0S1	8	6	0	0	1
138.037	3031745	C7H5N1O0S1	7	5	1	0	1
138.127	2981944	C9H13N1O0S0	9	13	1	0	0
139.037	3096258	C7H4N0O3S0	7	4	0	3	0
139.054	7400808	C11H4N0O0S0	11	4	0	0	0
141.07	27505738	C11H6N0O0S0	11	6	0	0	0
143.086	42419754	C11H8N0O0S0	11	8	0	0	0
144.081	6257354	C10H7N1O0S0	10	7	1	0	0
145.011	3167191	C9H2N0O0S1	9	2	0	0	1
145.065	19629243	C10H6N0O1S0	10	6	0	1	0
145.076	3472326	C9H6N2O0S0	9	6	2	0	0
145.101	63424660	C11H10N0O0S0	11	10	0	0	0
146.06	5918386	C9H5N1O1S0	9	5	1	1	0
146.096	7849858	C10H9N1O0S0	10	9	1	0	0
147.026	4077029	C9H4N0O0S1	9	4	0	0	1
147.044	4424312	C9H4N0O2S0	9	4	0	2	0
147.08	12552352	C10H8N0O1S0	10	8	0	1	0
147.117	14309256	C11H12N0O0S0	11	12	0	0	0
148.076	11393816	C9H7N1O1S0	9	7	1	1	0
148.112	9249799	C10H11N1O0S0	10	11	1	0	0
149.023	21837864	C8H2N0O3S0	8	2	0	3	0
149.042	4679523	C9H6N0O0S1	9	6	0	0	1
149.06	6543772	C9H6N0O2S0	9	6	0	2	0
149.096	6920465	C10H10N0O1S0	10	10	0	1	0
150.002	2970160	C7H1N1O1S1	7	1	1	1	1
150.055	4513954	C8H5N1O2S0	8	5	1	2	0
150.091	6037468	C9H9N1O1S0	9	9	1	1	0
150.128	8795159	C10H13N1O0S0	10	13	1	0	0
151.054	7013510	C12H4N0O0S0	12	4	0	0	0
151.075	3652432	C9H8N0O2S0	9	8	0	2	0
152.107	7628654	C9H11N1O1S0	9	11	1	1	0
152.143	6406257	C10H15N1O0S0	10	15	1	0	0
153.055	3572555	C8H6N0O3S0	8	6	0	3	0
153.065	5162419	C7H6N2O2S0	7	6	2	2	0
153.07	34753860	C12H6N0O0S0	12	6	0	0	0
154.049	3181618	C7H5N1O3S0	7	5	1	3	0
154.065	4408561	C11H5N1O0S0	11	5	1	0	0
154.123	3770765	C9H13N1O1S0	9	13	1	1	0
155.049	3112451	C11H4N0O1S0	11	4	0	1	0
155.086	46011218	C12H8N0O0S0	12	8	0	0	0
156.081	4408598	C11H7N1O0S0	11	7	1	0	0
157.065	6403936	C11H6N0O1S0	11	6	0	1	0
157.101	31218802	C12H10N0O0S0	12	10	0	0	0
158.06	3195130	C10H5N1O1S0	10	5	1	1	0
158.096	14267661	C11H9N1O0S0	11	9	1	0	0
159.08	13740175	C11H8N0O1S0	11	8	0	1	0
159.091	3308027	C10H8N2O0S0	10	8	2	0	0
159.117	34001442	C12H12N0O0S0	12	12	0	0	0
160.076	8602947	C10H7N1O1S0	10	7	1	1	0
160.112	11808981	C11H11N1O0S0	11	11	1	0	0
161.042	10721655	C10H6N0O0S1	10	6	0	0	1
161.06	7664830	C10H6N0O2S0	10	6	0	2	0
161.071	3217772	C9H6N2O1S0	9	6	2	1	0
161.096	13099089	C11H10N0O1S0	11	10	0	1	0
161.107	3080062	C10H10N2O0S0	10	10	2	0	0
161.133	5022947	C12H14N0O0S0	12	14	0	0	0
162.055	4195726	C9H5N1O2S0	9	5	1	2	0
162.091	12497887	C10H9N1O1S0	10	9	1	1	0
162.128	13610607	C11H13N1O0S0	11	13	1	0	0
163.002	3420981	C8H0N0O4S0	8	0	0	4	0
163.021	3936833	C9H4N0O1S1	9	4	0	1	1
163.039	3952775	C9H4N0O3S0	9	4	0	3	0
163.054	10567108	C13H4N0O0S0	13	4	0	0	0
163.058	5974225	C10H8N0O0S1	10	8	0	0	1
163.075	6649623	C10H8N0O2S0	10	8	0	2	0
163.112	4229542	C11H12N0O1S0	11	12	0	1	0
164.053	5396221	C9H7N1O0S1	9	7	1	0	1
164.071	4232002	C9H7N1O2S0	9	7	1	2	0
164.107	10910415	C10H11N1O1S0	10	11	1	1	0
164.143	8702556	C11H15N1O0S0	11	15	1	0	0
165.07	102111797	C13H6N0O0S0	13	6	0	0	0
165.073	5330241	C10H10N0O0S1	10	10	0	0	1
165.091	6290565	C10H10N0O2S0	10	10	0	2	0
166.032	4339654	C8H5N1O1S1	8	5	1	1	1
166.065	3544256	C12H5N1O0S0	12	5	1	0	0
166.068	3927500	C9H9N1O0S1	9	9	1	0	1
166.086	3675277	C9H9N1O2S0	9	9	1	2	0
166.123	8334996	C10H13N1O1S0	10	13	1	1	0
166.159	4982042	C11H17N1O0S0	11	17	1	0	0
167.07	3846534	C9H8N0O3S0	9	8	0	3	0
167.081	4273965	C8H8N2O2S0	8	8	2	2	0
167.086	94107453	C13H8N0O0S0	13	8	0	0	0
168.081	7627751	C12H7N1O0S0	12	7	1	0	0
168.138	7587501	C10H15N1O1S0	10	15	1	1	0
168.175	4875050	C11H19N1O0S0	11	19	1	0	0
169.065	16416228	C12H6N0O1S0	12	6	0	1	0
169.101	70974045	C13H10N0O0S0	13	10	0	0	0
170.06	3892338	C11H5N1O1S0	11	5	1	1	0
170.096	14082790	C12H9N1O0S0	12	9	1	0	0
171.026	4808965	C11H4N0O0S1	11	4	0	0	1
171.044	6735419	C11H4N0O2S0	11	4	0	2	0
171.08	26725032	C12H8N0O1S0	12	8	0	1	0
171.092	3390665	C11H8N2O0S0	11	8	2	0	0
171.117	55280403	C13H12N0O0S0	13	12	0	0	0
172.076	12409304	C11H7N1O1S0	11	7	1	1	0
172.112	46667325	C12H11N1O0S0	12	11	1	0	0
173.042	4783870	C11H6N0O0S1	11	6	0	0	1
173.06	13605420	C11H6N0O2S0	11	6	0	2	0
173.096	34308235	C12H10N0O1S0	12	10	0	1	0
173.107	10287784	C11H10N2O0S0	11	10	2	0	0
173.132	33263849	C13H14N0O0S0	13	14	0	0	0
174.054	4184040	C10H5N1O2S0	10	5	1	2	0
174.091	28966465	C11H9N1O1S0	11	9	1	1	0
174.128	43012760	C12H13N1O0S0	12	13	1	0	0
175.039	5160159	C10H4N0O3S0	10	4	0	3	0
175.058	25010952	C11H8N0O0S1	11	8	0	0	1
175.075	24118064	C11H8N0O2S0	11	8	0	2	0
175.087	3943498	C10H8N2O1S0	10	8	2	1	0
175.112	23505794	C12H12N0O1S0	12	12	0	1	0
175.123	6542235	C11H12N2O0S0	11	12	2	0	0
175.148	6915539	C13H16N0O0S0	13	16	0	0	0
176.053	6680947	C10H7N1O0S1	10	7	1	0	1
176.071	19383192	C10H7N1O2S0	10	7	1	2	0
176.107	26864612	C11H11N1O1S0	11	11	1	1	0
176.143	32945199	C12H15N1O0S0	12	15	1	0	0
177.037	8367919	C10H6N0O1S1	10	6	0	1	1
177.055	9881425	C10H6N0O3S0	10	6	0	3	0
177.066	8164199	C9H6N2O2S0	9	6	2	2	0
177.07	10538863	C14H6N0O0S0	14	6	0	0	0
177.073	9745270	C11H10N0O0S1	11	10	0	0	1
177.091	13920664	C11H10N0O2S0	11	10	0	2	0
177.102	6035118	C10H10N2O1S0	10	10	2	1	0
177.127	9524958	C12H14N0O1S0	12	14	0	1	0
177.139	3639796	C11H14N2O0S0	11	14	2	0	0
178.032	6384755	C9H5N1O1S1	9	5	1	1	1
178.065	6321839	C13H5N1O0S0	13	5	1	0	0
178.069	15068853	C10H9N1O0S1	10	9	1	0	1
178.086	15268053	C10H9N1O2S0	10	9	1	2	0
178.123	23109398	C11H13N1O1S0	11	13	1	1	0
178.159	20485975	C12H17N1O0S0	12	17	1	0	0
179.034	3281022	C9H4N0O4S0	9	4	0	4	0
179.052	7512925	C10H8N0O1S1	10	8	0	1	1
179.07	5841275	C10H8N0O3S0	10	8	0	3	0
179.081	11483021	C9H8N2O2S0	9	8	2	2	0
179.086	124641684	C14H8N0O0S0	14	8	0	0	0
179.089	5272986	C11H12N0O0S1	11	12	0	0	1
179.107	5344951	C11H12N0O2S0	11	12	0	2	0
179.118	4292298	C10H12N2O1S0	10	12	2	1	0
180.048	10151327	C9H7N1O1S1	9	7	1	1	1
180.065	4206651	C9H7N1O3S0	9	7	1	3	0
180.081	23101394	C13H7N1O0S0	13	7	1	0	0
180.084	6547671	C10H11N1O0S1	10	11	1	0	1
180.102	9395699	C10H11N1O2S0	10	11	1	2	0
180.138	19869739	C11H15N1O1S0	11	15	1	1	0
180.175	12199523	C12H19N1O0S0	12	19	1	0	0
181.032	6647649	C9H6N0O2S1	9	6	0	2	1
181.065	49116560	C13H6N0O1S0	13	6	0	1	0
181.076	3700192	C12H6N2O0S0	12	6	2	0	0
181.097	4926398	C9H10N2O2S0	9	10	2	2	0
181.101	210394565	C14H10N0O0S0	14	10	0	0	0
182.06	9698042	C12H5N1O1S0	12	5	1	1	0
182.063	6155774	C9H9N1O1S1	9	9	1	1	1
182.081	4426518	C9H9N1O3S0	9	9	1	3	0
182.096	32881451	C13H9N1O0S0	13	9	1	0	0
182.154	14208376	C11H17N1O1S0	11	17	1	1	0
182.19	5497768	C12H21N1O0S0	12	21	1	0	0
183.026	4929251	C12H4N0O0S1	12	4	0	0	1
183.044	7493625	C12H4N0O2S0	12	4	0	2	0
183.08	101238823	C13H8N0O1S0	13	8	0	1	0
183.092	9386549	C12H8N2O0S0	12	8	2	0	0
183.117	156174421	C14H12N0O0S0	14	12	0	0	0
184.076	33826017	C12H7N1O1S0	12	7	1	1	0
184.112	48860428	C13H11N1O0S0	13	11	1	0	0
185.034	4125483	C10H2N2O2S0	10	2	2	2	0
185.042	33005876	C12H6N0O0S1	12	6	0	0	1
185.06	43612488	C12H6N0O2S0	12	6	0	2	0
185.071	8864596	C11H6N2O1S0	11	6	2	1	0
185.096	104235376	C13H10N0O1S0	13	10	0	1	0
185.107	10183037	C12H10N2O0S0	12	10	2	0	0
185.132	97677721	C14H14N0O0S0	14	14	0	0	0
186.037	3996524	C11H5N1O0S1	11	5	1	0	1
186.055	17292671	C11H5N1O2S0	11	5	1	2	0
186.091	56092069	C12H9N1O1S0	12	9	1	1	0
186.128	85861835	C13H13N1O0S0	13	13	1	0	0
187.021	7317605	C11H4N0O1S1	11	4	0	1	1
187.039	16429431	C11H4N0O3S0	11	4	0	3	0
187.05	3427906	C10H4N2O2S0	10	4	2	2	0
187.054	16727430	C15H4N0O0S0	15	4	0	0	0
187.058	29753738	C12H8N0O0S1	12	8	0	0	1
187.075	60250524	C12H8N0O2S0	12	8	0	2	0
187.087	13193127	C11H8N2O1S0	11	8	2	1	0
187.112	61995456	C13H12N0O1S0	13	12	0	1	0
187.123	21983692	C12H12N2O0S0	12	12	2	0	0
187.148	25220581	C14H16N0O0S0	14	16	0	0	0
188.034	7600466	C10H3N1O3S0	10	3	1	3	0
188.053	10209636	C11H7N1O0S1	11	7	1	0	1
188.071	40256885	C11H7N1O2S0	11	7	1	2	0
188.107	89857433	C12H11N1O1S0	12	11	1	1	0
188.143	186777020	C13H15N1O0S0	13	15	1	0	0
189.037	17585429	C11H6N0O1S1	11	6	0	1	1
189.055	25410854	C11H6N0O3S0	11	6	0	3	0
189.066	8952625	C10H6N2O2S0	10	6	2	2	0
189.07	73109813	C15H6N0O0S0	15	6	0	0	0
189.073	61747512	C12H10N0O0S1	12	10	0	0	1
189.091	56013129	C12H10N0O2S0	12	10	0	2	0
189.102	19284307	C11H10N2O1S0	11	10	2	1	0
189.127	29747563	C13H14N0O1S0	13	14	0	1	0
189.139	13602166	C12H14N2O0S0	12	14	2	0	0
189.164	3469966	C14H18N0O0S0	14	18	0	0	0
190.032	11199165	C10H5N1O1S1	10	5	1	1	1
190.05	12047565	C10H5N1O3S0	10	5	1	3	0
190.065	11154652	C14H5N1O0S0	14	5	1	0	0
190.069	23933151	C11H9N1O0S1	11	9	1	0	1
190.086	58057967	C11H9N1O2S0	11	9	1	2	0
190.123	63321361	C12H13N1O1S0	12	13	1	1	0
190.159	77276467	C13H17N1O0S0	13	17	1	0	0
191.016	10880591	C10H4N0O2S1	10	4	0	2	1
191.034	9322592	C10H4N0O4S0	10	4	0	4	0
191.053	17948785	C11H8N0O1S1	11	8	0	1	1
191.07	33194114	C11H8N0O3S0	11	8	0	3	0
191.081	13050508	C10H8N2O2S0	10	8	2	2	0
191.086	124971152	C15H8N0O0S0	15	8	0	0	0
191.089	10631315	C12H12N0O0S1	12	12	0	0	1
191.107	25809059	C12H12N0O2S0	12	12	0	2	0
191.118	9532590	C11H12N2O1S0	11	12	2	1	0
191.143	32022725	C13H16N0O1S0	13	16	0	1	0
191.154	5103824	C12H16N2O0S0	12	16	2	0	0
192.048	21954574	C10H7N1O1S1	10	7	1	1	1
192.065	19137567	C10H7N1O3S0	10	7	1	3	0
192.081	15384621	C14H7N1O0S0	14	7	1	0	0
192.084	23969840	C11H11N1O0S1	11	11	1	0	1
192.102	42200128	C11H11N1O2S0	11	11	1	2	0
192.138	53988450	C12H15N1O1S0	12	15	1	1	0
192.175	75361412	C13H19N1O0S0	13	19	1	0	0
193.032	11402154	C10H6N0O2S1	10	6	0	2	1
193.05	9903547	C10H6N0O4S0	10	6	0	4	0
193.065	19836873	C14H6N0O1S0	14	6	0	1	0
193.068	8601037	C11H10N0O1S1	11	10	0	1	1
193.076	4242132	C13H6N2O0S0	13	6	2	0	0
193.086	14510046	C11H10N0O3S0	11	10	0	3	0
193.097	13277160	C10H10N2O2S0	10	10	2	2	0
193.101	279392236	C15H10N0O0S0	15	10	0	0	0
193.134	5593355	C11H14N2O1S0	11	14	2	1	0
194.06	8829317	C13H5N1O1S0	13	5	1	1	0
194.063	18317192	C10H9N1O1S1	10	9	1	1	1
194.081	12848538	C10H9N1O3S0	10	9	1	3	0
194.096	67670953	C14H9N1O0S0	14	9	1	0	0
194.1	14698412	C11H13N1O0S1	11	13	1	0	1
194.118	18474941	C11H13N1O2S0	11	13	1	2	0
194.154	48880609	C12H17N1O1S0	12	17	1	1	0
194.19	19604484	C13H21N1O0S0	13	21	1	0	0
195.026	4994370	C13H4N0O0S1	13	4	0	0	1
195.044	6272852	C13H4N0O2S0	13	4	0	2	0
195.047	7847767	C10H8N0O2S1	10	8	0	2	1
195.065	3991913	C10H8N0O4S0	10	8	0	4	0
195.076	5386868	C9H8N2O3S0	9	8	2	3	0
195.08	131422073	C14H8N0O1S0	14	8	0	1	0
195.084	4256636	C11H12N0O1S1	11	12	0	1	1
195.092	16409476	C13H8N2O0S0	13	8	2	0	0
195.102	4325006	C11H12N0O3S0	11	12	0	3	0
195.113	6954394	C10H12N2O2S0	10	12	2	2	0
195.117	263796638	C15H12N0O0S0	15	12	0	0	0
196.076	44004221	C13H7N1O1S0	13	7	1	1	0
196.079	8502145	C10H11N1O1S1	10	11	1	1	1
196.097	6866323	C10H11N1O3S0	10	11	1	3	0
196.112	68295587	C14H11N1O0S0	14	11	1	0	0
196.133	7860154	C11H15N1O2S0	11	15	1	2	0
196.17	20596704	C12H19N1O1S0	12	19	1	1	0
196.206	3408135	C13H23N1O0S0	13	23	1	0	0
197.042	118013844	C13H6N0O0S1	13	6	0	0	1
197.06	79421352	C13H6N0O2S0	13	6	0	2	0
197.071	10437044	C12H6N2O1S0	12	6	2	1	0
197.096	184459216	C14H10N0O1S0	14	10	0	1	0
197.107	21948381	C13H10N2O0S0	13	10	2	0	0
197.132	149889017	C15H14N0O0S0	15	14	0	0	0
198.055	22077467	C12H5N1O2S0	12	5	1	2	0
198.091	105530438	C13H9N1O1S0	13	9	1	1	0
198.112	5081311	C10H13N1O3S0	10	13	1	3	0
198.128	93185137	C14H13N1O0S0	14	13	1	0	0
199.039	17217736	C12H4N0O3S0	12	4	0	3	0
199.05	4019671	C11H4N2O2S0	11	4	2	2	0
199.054	2801884	C16H4N0O0S0	16	4	0	0	0
199.058	47442144	C13H8N0O0S1	13	8	0	0	1
199.075	92219638	C13H8N0O2S0	13	8	0	2	0
199.087	21956868	C12H8N2O1S0	12	8	2	1	0
199.112	173369636	C14H12N0O1S0	14	12	0	1	0
199.123	16874802	C13H12N2O0S0	13	12	2	0	0
199.148	56707410	C15H16N0O0S0	15	16	0	0	0
200.034	3960276	C11H3N1O3S0	11	3	1	3	0
200.053	12078573	C12H7N1O0S1	12	7	1	0	1
200.071	54275589	C12H7N1O2S0	12	7	1	2	0
200.107	95538742	C13H11N1O1S0	13	11	1	1	0
200.143	106245735	C14H15N1O0S0	14	15	1	0	0
201.037	25170758	C12H6N0O1S1	12	6	0	1	1
201.055	44358495	C12H6N0O3S0	12	6	0	3	0
201.066	14174063	C11H6N2O2S0	11	6	2	2	0
201.07	8440181	C16H6N0O0S0	16	6	0	0	0
201.073	51909498	C13H10N0O0S1	13	10	0	0	1
201.091	87667604	C13H10N0O2S0	13	10	0	2	0
201.102	24458148	C12H10N2O1S0	12	10	2	1	0
201.127	43140040	C14H14N0O1S0	14	14	0	1	0
201.139	19889113	C13H14N2O0S0	13	14	2	0	0
201.164	13913085	C15H18N0O0S0	15	18	0	0	0
202.032	14335251	C11H5N1O1S1	11	5	1	1	1
202.05	17963311	C11H5N1O3S0	11	5	1	3	0
202.065	5420614	C15H5N1O0S0	15	5	1	0	0
202.068	18139467	C12H9N1O0S1	12	9	1	0	1
202.086	76286311	C12H9N1O2S0	12	9	1	2	0
202.123	92789152	C13H13N1O1S0	13	13	1	1	0
202.159	155605464	C14H17N1O0S0	14	17	1	0	0
203.016	11516734	C11H4N0O2S1	11	4	0	2	1
203.034	10207579	C11H4N0O4S0	11	4	0	4	0
203.045	3968622	C10H4N2O3S0	10	4	2	3	0
203.053	19275642	C12H8N0O1S1	12	8	0	1	1
203.07	44371864	C12H8N0O3S0	12	8	0	3	0
203.081	17688491	C11H8N2O2S0	11	8	2	2	0
203.086	113328049	C16H8N0O0S0	16	8	0	0	0
203.089	42565559	C13H12N0O0S1	13	12	0	0	1
203.107	43022293	C13H12N0O2S0	13	12	0	2	0
203.118	15664104	C12H12N2O1S0	12	12	2	1	0
203.143	33824786	C14H16N0O1S0	14	16	0	1	0
203.154	10140709	C13H16N2O0S0	13	16	2	0	0
204.048	18057781	C11H7N1O1S1	11	7	1	1	1
204.066	22335061	C11H7N1O3S0	11	7	1	3	0
204.081	30600816	C15H7N1O0S0	15	7	1	0	0
204.084	23074422	C12H11N1O0S1	12	11	1	0	1
204.102	52983446	C12H11N1O2S0	12	11	1	2	0
204.138	57194200	C13H15N1O1S0	13	15	1	1	0
204.175	48670489	C14H19N1O0S0	14	19	1	0	0
205.032	16995670	C11H6N0O2S1	11	6	0	2	1
205.05	14574968	C11H6N0O4S0	11	6	0	4	0
205.061	7220109	C10H6N2O3S0	10	6	2	3	0
205.065	23147925	C15H6N0O1S0	15	6	0	1	0
205.068	8893339	C12H10N0O1S1	12	10	0	1	1
205.086	27874749	C12H10N0O3S0	12	10	0	3	0
205.097	13143507	C11H10N2O2S0	11	10	2	2	0
205.101	167914971	C16H10N0O0S0	16	10	0	0	0
205.105	8957921	C13H14N0O0S1	13	14	0	0	1
205.122	11188739	C13H14N0O2S0	13	14	0	2	0
205.134	6006809	C12H14N2O1S0	12	14	2	1	0
205.17	4043871	C13H18N2O0S0	13	18	2	0	0
206.063	15057224	C11H9N1O1S1	11	9	1	1	1
206.081	16444780	C11H9N1O3S0	11	9	1	3	0
206.096	23721355	C15H9N1O0S0	15	9	1	0	0
206.1	13701522	C12H13N1O0S1	12	13	1	0	1
206.118	34473398	C12H13N1O2S0	12	13	1	2	0
206.154	43853312	C13H17N1O1S0	13	17	1	1	0
206.19	33853002	C14H21N1O0S0	14	21	1	0	0
207.044	3786046	C14H4N0O2S0	14	4	0	2	0
207.047	16253253	C11H8N0O2S1	11	8	0	2	1
207.065	11527531	C11H8N0O4S0	11	8	0	4	0
207.076	3713923	C10H8N2O3S0	10	8	2	3	0
207.08	64548235	C15H8N0O1S0	15	8	0	1	0
207.084	3497363	C12H12N0O1S1	12	12	0	1	1
207.092	7139235	C14H8N2O0S0	14	8	2	0	0
207.102	13980088	C12H12N0O3S0	12	12	0	3	0
207.112	15379919	C11H12N2O2S0	11	12	2	2	0
207.117	253459929	C16H12N0O0S0	16	12	0	0	0
207.138	3773702	C13H16N0O2S0	13	16	0	2	0
207.186	4013676	C13H20N2O0S0	13	20	2	0	0
208.076	19811842	C14H7N1O1S0	14	7	1	1	0
208.079	9458185	C11H11N1O1S1	11	11	1	1	1
208.097	8878641	C11H11N1O3S0	11	11	1	3	0
208.112	58672723	C15H11N1O0S0	15	11	1	0	0
208.115	11765338	C12H15N1O0S1	12	15	1	0	1
208.133	15406722	C12H15N1O2S0	12	15	1	2	0
208.17	49190611	C13H19N1O1S0	13	19	1	1	0
208.206	7421732	C14H23N1O0S0	14	23	1	0	0
209.042	8444043	C14H6N0O0S1	14	6	0	0	1
209.06	35122868	C14H6N0O2S0	14	6	0	2	0
209.063	6696124	C11H10N0O2S1	11	10	0	2	1
209.071	7593166	C13H6N2O1S0	13	6	2	1	0
209.081	3779301	C11H10N0O4S0	11	10	0	4	0
209.092	5481213	C10H10N2O3S0	10	10	2	3	0
209.096	163516168	C15H10N0O1S0	15	10	0	1	0
209.107	19574562	C14H10N2O0S0	14	10	2	0	0
209.128	4875601	C11H14N2O2S0	11	14	2	2	0
209.132	188763996	C16H14N0O0S0	16	14	0	0	0
210.055	8062922	C13H5N1O2S0	13	5	1	2	0
210.091	82663457	C14H9N1O1S0	14	9	1	1	0
210.095	4890153	C11H13N1O1S1	11	13	1	1	1
210.112	6411859	C11H13N1O3S0	11	13	1	3	0
210.128	65738871	C15H13N1O0S0	15	13	1	0	0
210.149	5076137	C12H17N1O2S0	12	17	1	2	0
210.185	10370304	C13H21N1O1S0	13	21	1	1	0
211.021	7129308	C13H4N0O1S1	13	4	0	1	1
211.039	9366791	C13H4N0O3S0	13	4	0	3	0
211.05	3732515	C12H4N2O2S0	12	4	2	2	0
211.054	4185132	C17H4N0O0S0	17	4	0	0	0
211.058	75866421	C14H8N0O0S1	14	8	0	0	1
211.075	88031584	C14H8N0O2S0	14	8	0	2	0
211.087	15634811	C13H8N2O1S0	13	8	2	1	0
211.112	117932473	C15H12N0O1S0	15	12	0	1	0
211.123	20992468	C14H12N2O0S0	14	12	2	0	0
211.148	72876561	C16H16N0O0S0	16	16	0	0	0
212.053	7519941	C13H7N1O0S1	13	7	1	0	1
212.071	45497074	C13H7N1O2S0	13	7	1	2	0
212.107	105769804	C14H11N1O1S0	14	11	1	1	0
212.126	4196732	C11H15N1O3S0	11	15	1	3	0
212.143	80743335	C15H15N1O0S0	15	15	1	0	0
213.037	12277864	C13H6N0O1S1	13	6	0	1	1
213.055	40549525	C13H6N0O3S0	13	6	0	3	0
213.066	10532017	C12H6N2O2S0	12	6	2	2	0
213.07	24532155	C17H6N0O0S0	17	6	0	0	0
213.073	47514820	C14H10N0O0S1	14	10	0	0	1
213.091	100267249	C14H10N0O2S0	14	10	0	2	0
213.102	27129101	C13H10N2O1S0	13	10	2	1	0
213.127	66434381	C15H14N0O1S0	15	14	0	1	0
213.139	18179433	C14H14N2O0S0	14	14	2	0	0
213.164	32652713	C16H18N0O0S0	16	18	0	0	0
214.032	5071947	C12H5N1O1S1	12	5	1	1	1
214.05	12958328	C12H5N1O3S0	12	5	1	3	0
214.069	14796456	C13H9N1O0S1	13	9	1	0	1
214.086	74129109	C13H9N1O2S0	13	9	1	2	0
214.123	86736691	C14H13N1O1S0	14	13	1	1	0
214.159	67235728	C15H17N1O0S0	15	17	1	0	0
215.016	6065195	C12H4N0O2S1	12	4	0	2	1
215.034	13415513	C12H4N0O4S0	12	4	0	4	0
215.053	25012361	C13H8N0O1S1	13	8	0	1	1
215.07	57665719	C13H8N0O3S0	13	8	0	3	0
215.082	17930452	C12H8N2O2S0	12	8	2	2	0
215.086	121227487	C17H8N0O0S0	17	8	0	0	0
215.089	37902567	C14H12N0O0S1	14	12	0	0	1
215.107	58337557	C14H12N0O2S0	14	12	0	2	0
215.118	22278450	C13H12N2O1S0	13	12	2	1	0
215.143	20210035	C15H16N0O1S0	15	16	0	1	0
215.154	13219216	C14H16N2O0S0	14	16	2	0	0
215.179	6641617	C16H20N0O0S0	16	20	0	0	0
216.048	21451416	C12H7N1O1S1	12	7	1	1	1
216.066	27572934	C12H7N1O3S0	12	7	1	3	0
216.081	13281006	C16H7N1O0S0	16	7	1	0	0
216.084	17959671	C13H11N1O0S1	13	11	1	0	1
216.102	75924261	C13H11N1O2S0	13	11	1	2	0
216.138	65250179	C14H15N1O1S0	14	15	1	1	0
216.175	59720673	C15H19N1O0S0	15	19	1	0	0
217.032	19788945	C12H6N0O2S1	12	6	0	2	1
217.05	20104383	C12H6N0O4S0	12	6	0	4	0
217.061	10046172	C11H6N2O3S0	11	6	2	3	0
217.065	4809447	C16H6N0O1S0	16	6	0	1	0
217.068	16252143	C13H10N0O1S1	13	10	0	1	1
217.086	46116125	C13H10N0O3S0	13	10	0	3	0
217.097	20827450	C12H10N2O2S0	12	10	2	2	0
217.101	164322629	C17H10N0O0S0	17	10	0	0	0
217.105	22146382	C14H14N0O0S1	14	14	0	0	1
217.122	25677180	C14H14N0O2S0	14	14	0	2	0
217.134	8719769	C13H14N2O1S0	13	14	2	1	0
217.159	11068890	C15H18N0O1S0	15	18	0	1	0
217.17	6289911	C14H18N2O0S0	14	18	2	0	0
218.063	23840514	C12H9N1O1S1	12	9	1	1	1
218.081	37336880	C12H9N1O3S0	12	9	1	3	0
218.096	41437015	C16H9N1O0S0	16	9	1	0	0
218.1	28084064	C13H13N1O0S1	13	13	1	0	1
218.118	51087246	C13H13N1O2S0	13	13	1	2	0
218.154	70936556	C14H17N1O1S0	14	17	1	1	0
218.19	26808394	C15H21N1O0S0	15	21	1	0	0
219.026	3988915	C15H4N0O0S1	15	4	0	0	1
219.047	22364395	C12H8N0O2S1	12	8	0	2	1
219.065	23247128	C12H8N0O4S0	12	8	0	4	0
219.076	6789429	C11H8N2O3S0	11	8	2	3	0
219.08	86200640	C16H8N0O1S0	16	8	0	1	0
219.084	9988424	C13H12N0O1S1	13	12	0	1	1
219.092	6305116	C15H8N2O0S0	15	8	2	0	0
219.102	27842934	C13H12N0O3S0	13	12	0	3	0
219.112	12322193	C12H12N2O2S0	12	12	2	2	0
219.117	248361373	C17H12N0O0S0	17	12	0	0	0
219.138	5995987	C14H16N0O2S0	14	16	0	2	0
219.149	8495088	C13H16N2O1S0	13	16	2	1	0
219.174	7050289	C15H20N0O1S0	15	20	0	1	0
219.186	5659725	C14H20N2O0S0	14	20	2	0	0
220.003	3592693	C13H-1N1O3S0	13	-1	1	3	0
220.076	31755054	C15H7N1O1S0	15	7	1	1	0
220.079	21330742	C12H11N1O1S1	12	11	1	1	1
220.097	22940516	C12H11N1O3S0	12	11	1	3	0
220.112	51133322	C16H11N1O0S0	16	11	1	0	0
220.115	23645075	C13H15N1O0S1	13	15	1	0	1
220.133	39947200	C13H15N1O2S0	13	15	1	2	0
220.17	63425564	C14H19N1O1S0	14	19	1	1	0
220.206	11117689	C15H23N1O0S0	15	23	1	0	0
221.006	3707736	C14H2N0O1S1	14	2	0	1	1
221.042	19123379	C15H6N0O0S1	15	6	0	0	1
221.06	28564704	C15H6N0O2S0	15	6	0	2	0
221.063	12424424	C12H10N0O2S1	12	10	0	2	1
221.071	6127356	C14H6N2O1S0	14	6	2	1	0
221.081	13368596	C12H10N0O4S0	12	10	0	4	0
221.092	7282481	C11H10N2O3S0	11	10	2	3	0
221.096	143033659	C16H10N0O1S0	16	10	0	1	0
221.107	11167063	C15H10N2O0S0	15	10	2	0	0
221.117	6074223	C13H14N0O3S0	13	14	0	3	0
221.128	12466572	C12H14N2O2S0	12	14	2	2	0
221.132	241829270	C17H14N0O0S0	17	14	0	0	0
221.201	4014145	C14H22N2O0S0	14	22	2	0	0
222.055	9037443	C14H5N1O2S0	14	5	1	2	0
222.091	50314973	C15H9N1O1S0	15	9	1	1	0
222.095	9024229	C12H13N1O1S1	12	13	1	1	1
222.112	9413392	C12H13N1O3S0	12	13	1	3	0
222.128	77975350	C16H13N1O0S0	16	13	1	0	0
222.131	13555518	C13H17N1O0S1	13	17	1	0	1
222.149	14023530	C13H17N1O2S0	13	17	1	2	0
222.185	50487235	C14H21N1O1S0	14	21	1	1	0
223.039	12087256	C14H4N0O3S0	14	4	0	3	0
223.058	39634949	C15H8N0O0S1	15	8	0	0	1
223.075	89684015	C15H8N0O2S0	15	8	0	2	0
223.078	3874870	C12H12N0O2S1	12	12	0	2	1
223.087	16287818	C14H8N2O1S0	14	8	2	1	0
223.096	7403618	C12H12N0O4S0	12	12	0	4	0
223.107	10394748	C11H12N2O3S0	11	12	2	3	0
223.112	178624646	C16H12N0O1S0	16	12	0	1	0
223.123	23668897	C15H12N2O0S0	15	12	2	0	0
223.144	5010388	C12H16N2O2S0	12	16	2	2	0
223.148	100382941	C17H16N0O0S0	17	16	0	0	0
224.053	6494006	C14H7N1O0S1	14	7	1	0	1
224.071	35647839	C14H7N1O2S0	14	7	1	2	0
224.107	117907892	C15H11N1O1S0	15	11	1	1	0
224.11	5478332	C12H15N1O1S1	12	15	1	1	1
224.128	5632485	C12H15N1O3S0	12	15	1	3	0
224.143	72835592	C16H15N1O0S0	16	15	1	0	0
224.201	5084558	C14H23N1O1S0	14	23	1	1	0
225.037	16902662	C14H6N0O1S1	14	6	0	1	1
225.055	40176174	C14H6N0O3S0	14	6	0	3	0
225.066	11583047	C13H6N2O2S0	13	6	2	2	0
225.07	6641744	C18H6N0O0S0	18	6	0	0	0
225.073	138668632	C15H10N0O0S1	15	10	0	0	1
225.091	153971328	C15H10N0O2S0	15	10	0	2	0
225.102	30558873	C14H10N2O1S0	14	10	2	1	0
225.127	109890258	C16H14N0O1S0	16	14	0	1	0
225.139	27198187	C15H14N2O0S0	15	14	2	0	0
225.164	49089315	C17H18N0O0S0	17	18	0	0	0
226.032	4685470	C13H5N1O1S1	13	5	1	1	1
226.05	13211333	C13H5N1O3S0	13	5	1	3	0
226.068	10199789	C14H9N1O0S1	14	9	1	0	1
226.086	79901460	C14H9N1O2S0	14	9	1	2	0
226.123	101995362	C15H13N1O1S0	15	13	1	1	0
226.159	61158321	C16H17N1O0S0	16	17	1	0	0
227.016	5847237	C13H4N0O2S1	13	4	0	2	1
227.034	13017834	C13H4N0O4S0	13	4	0	4	0
227.053	24724240	C14H8N0O1S1	14	8	0	1	1
227.07	82746165	C14H8N0O3S0	14	8	0	3	0
227.082	31886156	C13H8N2O2S0	13	8	2	2	0
227.086	25682772	C18H8N0O0S0	18	8	0	0	0
227.089	42117979	C15H12N0O0S1	15	12	0	0	1
227.107	106806144	C15H12N0O2S0	15	12	0	2	0
227.118	32422807	C14H12N2O1S0	14	12	2	1	0
227.143	49089483	C16H16N0O1S0	16	16	0	1	0
227.154	12988386	C15H16N2O0S0	15	16	2	0	0
227.179	19700758	C17H20N0O0S0	17	20	0	0	0
228.048	21818086	C13H7N1O1S1	13	7	1	1	1
228.066	43676425	C13H7N1O3S0	13	7	1	3	0
228.081	11524903	C17H7N1O0S0	17	7	1	0	0
228.084	22610733	C14H11N1O0S1	14	11	1	0	1
228.102	112214864	C14H11N1O2S0	14	11	1	2	0
228.138	105431959	C15H15N1O1S0	15	15	1	1	0
228.175	58459102	C16H19N1O0S0	16	19	1	0	0
229.032	18041400	C13H6N0O2S1	13	6	0	2	1
229.05	28019288	C13H6N0O4S0	13	6	0	4	0
229.061	10129005	C12H6N2O3S0	12	6	2	3	0
229.065	5112437	C17H6N0O1S0	17	6	0	1	0
229.068	23925371	C14H10N0O1S1	14	10	0	1	1
229.086	68774556	C14H10N0O3S0	14	10	0	3	0
229.097	30649008	C13H10N2O2S0	13	10	2	2	0
229.101	161827512	C18H10N0O0S0	18	10	0	0	0
229.105	34863806	C15H14N0O0S1	15	14	0	0	1
229.122	51092190	C15H14N0O2S0	15	14	0	2	0
229.134	26122995	C14H14N2O1S0	14	14	2	1	0
229.159	17828641	C16H18N0O1S0	16	18	0	1	0
229.17	11601718	C15H18N2O0S0	15	18	2	0	0
229.195	4012900	C17H22N0O0S0	17	22	0	0	0
230.063	30679398	C13H9N1O1S1	13	9	1	1	1
230.081	37441924	C13H9N1O3S0	13	9	1	3	0
230.096	22124958	C17H9N1O0S0	17	9	1	0	0
230.1	22688164	C14H13N1O0S1	14	13	1	0	1
230.118	81760706	C14H13N1O2S0	14	13	1	2	0
230.154	61280768	C15H17N1O1S0	15	17	1	1	0
230.19	36708926	C16H21N1O0S0	16	21	1	0	0
231.047	35080123	C13H8N0O2S1	13	8	0	2	1
231.065	35112920	C13H8N0O4S0	13	8	0	4	0
231.076	19126249	C12H8N2O3S0	12	8	2	3	0
231.08	68376560	C17H8N0O1S0	17	8	0	1	0
231.084	13343733	C14H12N0O1S1	14	12	0	1	1
231.102	55314449	C14H12N0O3S0	14	12	0	3	0
231.113	21631011	C13H12N2O2S0	13	12	2	2	0
231.117	263591977	C18H12N0O0S0	18	12	0	0	0
231.12	21207086	C15H16N0O0S1	15	16	0	0	1
231.138	16119882	C15H16N0O2S0	15	16	0	2	0
231.149	14075996	C14H16N2O1S0	14	16	2	1	0
231.174	4458115	C16H20N0O1S0	16	20	0	1	0
231.186	5670548	C15H20N2O0S0	15	20	2	0	0
232.076	23797191	C16H7N1O1S0	16	7	1	1	0
232.079	26811852	C13H11N1O1S1	13	11	1	1	1
232.097	33910246	C13H11N1O3S0	13	11	1	3	0
232.112	62070267	C17H11N1O0S0	17	11	1	0	0
232.115	26453504	C14H15N1O0S1	14	15	1	0	1
232.133	55791129	C14H15N1O2S0	14	15	1	2	0
232.17	65740365	C15H19N1O1S0	15	19	1	1	0
232.206	17213056	C16H23N1O0S0	16	23	1	0	0
233.06	20441850	C16H6N0O2S0	16	6	0	2	0
233.063	19014399	C13H10N0O2S1	13	10	0	2	1
233.071	4332809	C15H6N2O1S0	15	6	2	1	0
233.081	25852693	C13H10N0O4S0	13	10	0	4	0
233.092	11999523	C12H10N2O3S0	12	10	2	3	0
233.096	150807337	C17H10N0O1S0	17	10	0	1	0
233.107	7964471	C16H10N2O0S0	16	10	2	0	0
233.117	15389507	C14H14N0O3S0	14	14	0	3	0
233.128	13942609	C13H14N2O2S0	13	14	2	2	0
233.132	228729687	C18H14N0O0S0	18	14	0	0	0
233.154	7669617	C15H18N0O2S0	15	18	0	2	0
234.091	73033669	C16H9N1O1S0	16	9	1	1	0
234.095	16263113	C13H13N1O1S1	13	13	1	1	1
234.112	20776924	C13H13N1O3S0	13	13	1	3	0
234.128	66512877	C17H13N1O0S0	17	13	1	0	0
234.131	16052209	C14H17N1O0S1	14	17	1	0	1
234.149	34396164	C14H17N1O2S0	14	17	1	2	0
234.185	66586668	C15H21N1O1S0	15	21	1	1	0
235.039	5246347	C15H4N0O3S0	15	4	0	3	0
235.058	47061916	C16H8N0O0S1	16	8	0	0	1
235.075	83413933	C16H8N0O2S0	16	8	0	2	0
235.079	6481840	C13H12N0O2S1	13	12	0	2	1
235.087	16536503	C15H8N2O1S0	15	8	2	1	0
235.096	8638400	C13H12N0O4S0	13	12	0	4	0
235.108	6574027	C12H12N2O3S0	12	12	2	3	0
235.112	157330382	C17H12N0O1S0	17	12	0	1	0
235.123	15365081	C16H12N2O0S0	16	12	2	0	0
235.133	5062114	C14H16N0O3S0	14	16	0	3	0
235.144	14439404	C13H16N2O2S0	13	16	2	2	0
235.148	141798384	C18H16N0O0S0	18	16	0	0	0
236.053	4447713	C15H7N1O0S1	15	7	1	0	1
236.071	38260462	C15H7N1O2S0	15	7	1	2	0
236.107	97955593	C16H11N1O1S0	16	11	1	1	0
236.11	7969547	C13H15N1O1S1	13	15	1	1	1
236.128	11557656	C13H15N1O3S0	13	15	1	3	0
236.143	82005796	C17H15N1O0S0	17	15	1	0	0
236.147	9386790	C14H19N1O0S1	14	19	1	0	1
236.164	11449139	C14H19N1O2S0	14	19	1	2	0
236.201	27475790	C15H23N1O1S0	15	23	1	1	0
237.037	8588654	C15H6N0O1S1	15	6	0	1	1
237.055	38273400	C15H6N0O3S0	15	6	0	3	0
237.066	7804287	C14H6N2O2S0	14	6	2	2	0
237.07	15737217	C19H6N0O0S0	19	6	0	0	0
237.073	70955395	C16H10N0O0S1	16	10	0	0	1
237.091	120762765	C16H10N0O2S0	16	10	0	2	0
237.102	24027539	C15H10N2O1S0	15	10	2	1	0
237.112	3861913	C13H14N0O4S0	13	14	0	4	0
237.123	6393247	C12H14N2O3S0	12	14	2	3	0
237.127	140095906	C17H14N0O1S0	17	14	0	1	0
237.139	21240232	C16H14N2O0S0	16	14	2	0	0
237.164	70136246	C18H18N0O0S0	18	18	0	0	0
238.032	4247901	C14H5N1O1S1	14	5	1	1	1
238.05	16427877	C14H5N1O3S0	14	5	1	3	0
238.069	7307116	C15H9N1O0S1	15	9	1	0	1
238.086	68359028	C15H9N1O2S0	15	9	1	2	0
238.123	125334402	C16H13N1O1S0	16	13	1	1	0
238.144	7158667	C13H17N1O3S0	13	17	1	3	0
238.159	70013841	C17H17N1O0S0	17	17	1	0	0
239.016	3990701	C14H4N0O2S1	14	4	0	2	1
239.034	13593778	C14H4N0O4S0	14	4	0	4	0
239.053	25322679	C15H8N0O1S1	15	8	0	1	1
239.07	86463675	C15H8N0O3S0	15	8	0	3	0
239.082	22795454	C14H8N2O2S0	14	8	2	2	0
239.086	108393663	C19H8N0O0S0	19	8	0	0	0
239.089	120583360	C16H12N0O0S1	16	12	0	0	1
239.107	136262853	C16H12N0O2S0	16	12	0	2	0
239.118	35923144	C15H12N2O1S0	15	12	2	1	0
239.143	72365262	C17H16N0O1S0	17	16	0	1	0
239.154	15803601	C16H16N2O0S0	16	16	2	0	0
239.179	37332183	C18H20N0O0S0	18	20	0	0	0
240.048	13837684	C14H7N1O1S1	14	7	1	1	1
240.066	36279670	C14H7N1O3S0	14	7	1	3	0
240.084	20456824	C15H11N1O0S1	15	11	1	0	1
240.102	97424762	C15H11N1O2S0	15	11	1	2	0
240.138	92853630	C16H15N1O1S0	16	15	1	1	0
240.175	50083202	C17H19N1O0S0	17	19	1	0	0
241.032	15678888	C14H6N0O2S1	14	6	0	2	1
241.05	29812136	C14H6N0O4S0	14	6	0	4	0
241.061	8730024	C13H6N2O3S0	13	6	2	3	0
241.068	29230504	C15H10N0O1S1	15	10	0	1	1
241.086	99972520	C15H10N0O3S0	15	10	0	3	0
241.097	41522599	C14H10N2O2S0	14	10	2	2	0
241.101	109376935	C19H10N0O0S0	19	10	0	0	0
241.105	30852519	C16H14N0O0S1	16	14	0	0	1
241.122	81008039	C16H14N0O2S0	16	14	0	2	0
241.134	29201831	C15H14N2O1S0	15	14	2	1	0
241.159	31716774	C17H18N0O1S0	17	18	0	1	0
241.17	12030374	C16H18N2O0S0	16	18	2	0	0
241.195	11052453	C18H22N0O0S0	18	22	0	0	0
242.063	26279259	C14H9N1O1S1	14	9	1	1	1
242.081	51733849	C14H9N1O3S0	14	9	1	3	0
242.096	9460055	C18H9N1O0S0	18	9	1	0	0
242.1	14619990	C15H13N1O0S1	15	13	1	0	1
242.118	78058836	C15H13N1O2S0	15	13	1	2	0
242.154	65500494	C16H17N1O1S0	16	17	1	1	0
242.19	35337545	C17H21N1O0S0	17	21	1	0	0
243.047	34464925	C14H8N0O2S1	14	8	0	2	1
243.065	47395993	C14H8N0O4S0	14	8	0	4	0
243.076	22996118	C13H8N2O3S0	13	8	2	3	0
243.08	32584853	C18H8N0O1S0	18	8	0	1	0
243.084	17886356	C15H12N0O1S1	15	12	0	1	1
243.102	72348816	C15H12N0O3S0	15	12	0	3	0
243.113	34518157	C14H12N2O2S0	14	12	2	2	0
243.117	218084492	C19H12N0O0S0	19	12	0	0	0
243.12	24788107	C16H16N0O0S1	16	16	0	0	1
243.138	37045382	C16H16N0O2S0	16	16	0	2	0
243.149	20288643	C15H16N2O1S0	15	16	2	1	0
243.174	9955453	C17H20N0O1S0	17	20	0	1	0
243.186	10531962	C16H20N2O0S0	16	20	2	0	0
244.076	7193448	C17H7N1O1S0	17	7	1	1	0
244.079	31798119	C14H11N1O1S1	14	11	1	1	1
244.097	41169761	C14H11N1O3S0	14	11	1	3	0
244.112	42296155	C18H11N1O0S0	18	11	1	0	0
244.115	19002202	C15H15N1O0S1	15	15	1	0	1
244.133	64607060	C15H15N1O2S0	15	15	1	2	0
244.17	67539783	C16H19N1O1S0	16	19	1	1	0
244.206	23552825	C17H23N1O0S0	17	23	1	0	0
245.042	13054440	C17H6N0O0S1	17	6	0	0	1
245.06	10673632	C17H6N0O2S0	17	6	0	2	0
245.063	29409759	C14H10N0O2S1	14	10	0	2	1
245.081	35054039	C14H10N0O4S0	14	10	0	4	0
245.092	22338002	C13H10N2O3S0	13	10	2	3	0
245.096	136327632	C18H10N0O1S0	18	10	0	1	0
245.099	10642895	C15H14N0O1S1	15	14	0	1	1
245.107	5973451	C17H10N2O0S0	17	10	2	0	0
245.117	44372423	C15H14N0O3S0	15	14	0	3	0
245.128	21914050	C14H14N2O2S0	14	14	2	2	0
245.132	255144384	C19H14N0O0S0	19	14	0	0	0
245.136	18561470	C16H18N0O0S1	16	18	0	0	1
245.154	13773238	C16H18N0O2S0	16	18	0	2	0
245.165	8751537	C15H18N2O1S0	15	18	2	1	0
245.201	3854241	C16H22N2O0S0	16	22	2	0	0
246.055	4168191	C16H5N1O2S0	16	5	1	2	0
246.091	55537643	C17H9N1O1S0	17	9	1	1	0
246.095	20834282	C14H13N1O1S1	14	13	1	1	1
246.112	33927136	C14H13N1O3S0	14	13	1	3	0
246.128	67055576	C18H13N1O0S0	18	13	1	0	0
246.131	14790614	C15H17N1O0S1	15	17	1	0	1
246.149	44466125	C15H17N1O2S0	15	17	1	2	0
246.185	48689082	C16H21N1O1S0	16	21	1	1	0
246.222	7429030	C17H25N1O0S0	17	25	1	0	0
247.058	27672013	C17H8N0O0S1	17	8	0	0	1
247.075	62918082	C17H8N0O2S0	17	8	0	2	0
247.079	13481408	C14H12N0O2S1	14	12	0	2	1
247.087	8300987	C16H8N2O1S0	16	8	2	1	0
247.096	23330229	C14H12N0O4S0	14	12	0	4	0
247.107	11710895	C13H12N2O3S0	13	12	2	3	0
247.112	183365036	C18H12N0O1S0	18	12	0	1	0
247.123	9959845	C17H12N2O0S0	17	12	2	0	0
247.133	10334624	C15H16N0O3S0	15	16	0	3	0
247.144	10300825	C14H16N2O2S0	14	16	2	2	0
247.148	192769430	C19H16N0O0S0	19	16	0	0	0
247.181	4590467	C15H20N2O1S0	15	20	2	1	0
248.071	22901585	C16H7N1O2S0	16	7	1	2	0
248.107	104033081	C17H11N1O1S0	17	11	1	1	0
248.11	10160951	C14H15N1O1S1	14	15	1	1	1
248.128	19407659	C14H15N1O3S0	14	15	1	3	0
248.143	67676961	C18H15N1O0S0	18	15	1	0	0
248.147	11854623	C15H19N1O0S1	15	19	1	0	1
248.165	27974419	C15H19N1O2S0	15	19	1	2	0
248.201	41122555	C16H23N1O1S0	16	23	1	1	0
249.037	4928189	C16H6N0O1S1	16	6	0	1	1
249.055	33540272	C16H6N0O3S0	16	6	0	3	0
249.066	7271592	C15H6N2O2S0	15	6	2	2	0
249.073	77867171	C17H10N0O0S1	17	10	0	0	1
249.091	142583958	C17H10N0O2S0	17	10	0	2	0
249.102	20555918	C16H10N2O1S0	16	10	2	1	0
249.112	8154247	C14H14N0O4S0	14	14	0	4	0
249.123	7448704	C13H14N2O3S0	13	14	2	3	0
249.127	178399356	C18H14N0O1S0	18	14	0	1	0
249.139	14667892	C17H14N2O0S0	17	14	2	0	0
249.16	8665189	C14H18N2O2S0	14	18	2	2	0
249.164	102967394	C19H18N0O0S0	19	18	0	0	0
250.032	4366823	C15H5N1O1S1	15	5	1	1	1
250.05	8126938	C15H5N1O3S0	15	5	1	3	0
250.068	5685708	C16H9N1O0S1	16	9	1	0	1
250.086	71165375	C16H9N1O2S0	16	9	1	2	0
250.123	120464803	C17H13N1O1S0	17	13	1	1	0
250.126	6527393	C14H17N1O1S1	14	17	1	1	1
250.144	13610388	C14H17N1O3S0	14	17	1	3	0
250.159	69649800	C18H17N1O0S0	18	17	1	0	0
250.162	4127621	C15H21N1O0S1	15	21	1	0	1
250.18	9221496	C15H21N1O2S0	15	21	1	2	0
250.217	13927773	C16H25N1O1S0	16	25	1	1	0
251.034	7665385	C15H4N0O4S0	15	4	0	4	0
251.047	28590815	C14H4N2O3S0	14	4	2	3	0
251.053	22196954	C16H8N0O1S1	16	8	0	1	1
251.07	64684749	C16H8N0O3S0	16	8	0	3	0
251.082	22420164	C15H8N2O2S0	15	8	2	2	0
251.089	79692478	C17H12N0O0S1	17	12	0	0	1
251.107	129589936	C17H12N0O2S0	17	12	0	2	0
251.118	26698407	C16H12N2O1S0	16	12	2	1	0
251.139	5083543	C13H16N2O3S0	13	16	2	3	0
251.143	89342612	C18H16N0O1S0	18	16	0	1	0
251.154	13707915	C17H16N2O0S0	17	16	2	0	0
251.179	36237943	C19H20N0O0S0	19	20	0	0	0
252.048	11781063	C15H7N1O1S1	15	7	1	1	1
252.066	35225528	C15H7N1O3S0	15	7	1	3	0
252.084	14407593	C16H11N1O0S1	16	11	1	0	1
252.102	99835803	C16H11N1O2S0	16	11	1	2	0
252.138	110288766	C17H15N1O1S0	17	15	1	1	0
252.142	3779451	C14H19N1O1S1	14	19	1	1	1
252.159	7539565	C14H19N1O3S0	14	19	1	3	0
252.175	57556833	C18H19N1O0S0	18	19	1	0	0
252.196	3769168	C15H23N1O2S0	15	23	1	2	0
253.032	12197036	C15H6N0O2S1	15	6	0	2	1
253.05	33094814	C15H6N0O4S0	15	6	0	4	0
253.061	13427860	C14H6N2O3S0	14	6	2	3	0
253.068	27053198	C16H10N0O1S1	16	10	0	1	1
253.086	105045120	C16H10N0O3S0	16	10	0	3	0
253.097	31079543	C15H10N2O2S0	15	10	2	2	0
253.101	76864628	C20H10N0O0S0	20	10	0	0	0
253.105	65756273	C17H14N0O0S1	17	14	0	0	1
253.122	96935010	C17H14N0O2S0	17	14	0	2	0
253.134	29768793	C16H14N2O1S0	16	14	2	1	0
253.159	37559365	C18H18N0O1S0	18	18	0	1	0
253.17	9697340	C17H18N2O0S0	17	18	2	0	0
253.195	19735591	C19H22N0O0S0	19	22	0	0	0
254.063	23296357	C15H9N1O1S1	15	9	1	1	1
254.081	60938583	C15H9N1O3S0	15	9	1	3	0
254.096	10141002	C19H9N1O0S0	19	9	1	0	0
254.1	16845127	C16H13N1O0S1	16	13	1	0	1
254.118	99260729	C16H13N1O2S0	16	13	1	2	0
254.154	93026588	C17H17N1O1S0	17	17	1	1	0
254.19	51083518	C18H21N1O0S0	18	21	1	0	0
255.047	31946313	C15H8N0O2S1	15	8	0	2	1
255.065	57349691	C15H8N0O4S0	15	8	0	4	0
255.076	24258098	C14H8N2O3S0	14	8	2	3	0
255.08	34059823	C19H8N0O1S0	19	8	0	1	0
255.084	23408172	C16H12N0O1S1	16	12	0	1	1
255.102	95295006	C16H12N0O3S0	16	12	0	3	0
255.113	39904789	C15H12N2O2S0	15	12	2	2	0
255.117	161027601	C20H12N0O0S0	20	12	0	0	0
255.12	26387983	C17H16N0O0S1	17	16	0	0	1
255.138	51541505	C17H16N0O2S0	17	16	0	2	0
255.149	22595063	C16H16N2O1S0	16	16	2	1	0
255.174	21423587	C18H20N0O1S0	18	20	0	1	0
255.186	4751834	C17H20N2O0S0	17	20	2	0	0
255.211	7866822	C19H24N0O0S0	19	24	0	0	0
256.076	4754201	C18H7N1O1S0	18	7	1	1	0
256.079	29926166	C15H11N1O1S1	15	11	1	1	1
256.097	64025352	C15H11N1O3S0	15	11	1	3	0
256.112	18131708	C19H11N1O0S0	19	11	1	0	0
256.115	24072953	C16H15N1O0S1	16	15	1	0	1
256.133	79729388	C16H15N1O2S0	16	15	1	2	0
256.17	61174479	C17H19N1O1S0	17	19	1	1	0
256.206	27701939	C18H23N1O0S0	18	23	1	0	0
257.06	5442084	C18H6N0O2S0	18	6	0	2	0
257.063	26075169	C15H10N0O2S1	15	10	0	2	1
257.081	42799124	C15H10N0O4S0	15	10	0	4	0
257.092	27332619	C14H10N2O3S0	14	10	2	3	0
257.096	64778248	C19H10N0O1S0	19	10	0	1	0
257.099	10053638	C16H14N0O1S1	16	14	0	1	1
257.117	52932600	C16H14N0O3S0	16	14	0	3	0
257.128	27418608	C15H14N2O2S0	15	14	2	2	0
257.132	186306541	C20H14N0O0S0	20	14	0	0	0
257.136	19048426	C17H18N0O0S1	17	18	0	0	1
257.154	18079709	C17H18N0O2S0	17	18	0	2	0
257.165	13299669	C16H18N2O1S0	16	18	2	1	0
257.19	3997634	C18H22N0O1S0	18	22	0	1	0
257.201	4276153	C17H22N2O0S0	17	22	2	0	0
258.091	23706927	C18H9N1O1S0	18	9	1	1	0
258.095	26205484	C15H13N1O1S1	15	13	1	1	1
258.112	49163552	C15H13N1O3S0	15	13	1	3	0
258.128	58584341	C19H13N1O0S0	19	13	1	0	0
258.131	17440018	C16H17N1O0S1	16	17	1	0	1
258.149	57076998	C16H17N1O2S0	16	17	1	2	0
258.185	60738796	C17H21N1O1S0	17	21	1	1	0
258.222	14871762	C18H25N1O0S0	18	25	1	0	0
259.058	18182805	C18H8N0O0S1	18	8	0	0	1
259.075	39901833	C18H8N0O2S0	18	8	0	2	0
259.079	18170503	C15H12N0O2S1	15	12	0	2	1
259.087	4960898	C17H8N2O1S0	17	8	2	1	0
259.096	28093051	C15H12N0O4S0	15	12	0	4	0
259.108	15917684	C14H12N2O3S0	14	12	2	3	0
259.112	155830897	C19H12N0O1S0	19	12	0	1	0
259.123	5220458	C18H12N2O0S0	18	12	2	0	0
259.133	25561699	C16H16N0O3S0	16	16	0	3	0
259.144	13814364	C15H16N2O2S0	15	16	2	2	0
259.148	151865945	C20H16N0O0S0	20	16	0	0	0
259.152	12805719	C17H20N0O0S1	17	20	0	0	1
259.169	5709899	C17H20N0O2S0	17	20	0	2	0
259.18	4235332	C16H20N2O1S0	16	20	2	1	0
259.217	3852332	C17H24N2O0S0	17	24	2	0	0
260.071	15446035	C17H7N1O2S0	17	7	1	2	0
260.107	88565757	C18H11N1O1S0	18	11	1	1	0
260.11	14180347	C15H15N1O1S1	15	15	1	1	1
260.128	34457584	C15H15N1O3S0	15	15	1	3	0
260.143	67692519	C19H15N1O0S0	19	15	1	0	0
260.147	10622949	C16H19N1O0S1	16	19	1	0	1
260.164	55920602	C16H19N1O2S0	16	19	1	2	0
260.201	47179717	C17H23N1O1S0	17	23	1	1	0
260.237	5008815	C18H27N1O0S0	18	27	1	0	0
261.037	5031404	C17H6N0O1S1	17	6	0	1	1
261.055	15322595	C17H6N0O3S0	17	6	0	3	0
261.066	5457373	C16H6N2O2S0	16	6	2	2	0
261.073	69354969	C18H10N0O0S1	18	10	0	0	1
261.091	116950480	C18H10N0O2S0	18	10	0	2	0
261.094	8170958	C15H14N0O2S1	15	14	0	2	1
261.102	15779274	C17H10N2O1S0	17	10	2	1	0
261.112	13408708	C15H14N0O4S0	15	14	0	4	0
261.123	10735039	C14H14N2O3S0	14	14	2	3	0
261.127	188253628	C19H14N0O1S0	19	14	0	1	0
261.139	10888630	C18H14N2O0S0	18	14	2	0	0
261.149	7821745	C16H18N0O3S0	16	18	0	3	0
261.16	12634539	C15H18N2O2S0	15	18	2	2	0
261.164	134972841	C20H18N0O0S0	20	18	0	0	0
262.05	4436983	C16H5N1O3S0	16	5	1	3	0
262.086	52380647	C17H9N1O2S0	17	9	1	2	0
262.123	108102614	C18H13N1O1S0	18	13	1	1	0
262.126	7248853	C15H17N1O1S1	15	17	1	1	1
262.144	19727309	C15H17N1O3S0	15	17	1	3	0
262.159	56976326	C19H17N1O0S0	19	17	1	0	0
262.162	9132997	C16H21N1O0S1	16	21	1	0	1
262.18	20491197	C16H21N1O2S0	16	21	1	2	0
262.217	22401965	C17H25N1O1S0	17	25	1	1	0
263.034	4653156	C16H4N0O4S0	16	4	0	4	0
263.047	32006751	C15H4N2O3S0	15	4	2	3	0
263.053	9555549	C17H8N0O1S1	17	8	0	1	1
263.07	51716695	C17H8N0O3S0	17	8	0	3	0
263.082	14293587	C16H8N2O2S0	16	8	2	2	0
263.086	9763409	C21H8N0O0S0	21	8	0	0	0
263.089	70017616	C18H12N0O0S1	18	12	0	0	1
263.107	138510922	C18H12N0O2S0	18	12	0	2	0
263.118	22123078	C17H12N2O1S0	17	12	2	1	0
263.128	4168770	C15H16N0O4S0	15	16	0	4	0
263.139	4588094	C14H16N2O3S0	14	16	2	3	0
263.143	103203389	C19H16N0O1S0	19	16	0	1	0
263.154	10267193	C18H16N2O0S0	18	16	2	0	0
263.175	6581809	C15H20N2O2S0	15	20	2	2	0
263.179	47276592	C20H20N0O0S0	20	20	0	0	0
264.048	5370149	C16H7N1O1S1	16	7	1	1	1
264.066	27558177	C16H7N1O3S0	16	7	1	3	0
264.084	8343836	C17H11N1O0S1	17	11	1	0	1
264.102	86663447	C17H11N1O2S0	17	11	1	2	0
264.138	106692878	C18H15N1O1S0	18	15	1	1	0
264.142	3935501	C15H19N1O1S1	15	19	1	1	1
264.159	11844873	C15H19N1O3S0	15	19	1	3	0
264.175	49021189	C19H19N1O0S0	19	19	1	0	0
264.196	5225216	C16H23N1O2S0	16	23	1	2	0
264.232	4499703	C17H27N1O1S0	17	27	1	1	0
264.27	4116206	C18H31N1O0S0	18	31	1	0	0
265.032	9855064	C16H6N0O2S1	16	6	0	2	1
265.05	28213333	C16H6N0O4S0	16	6	0	4	0
265.061	11083860	C15H6N2O3S0	15	6	2	3	0
265.068	29999186	C17H10N0O1S1	17	10	0	1	1
265.086	105709648	C17H10N0O3S0	17	10	0	3	0
265.097	33947726	C16H10N2O2S0	16	10	2	2	0
265.101	39895118	C21H10N0O0S0	21	10	0	0	0
265.105	85876813	C18H14N0O0S1	18	14	0	0	1
265.122	130072650	C18H14N0O2S0	18	14	0	2	0
265.134	30138441	C17H14N2O1S0	17	14	2	1	0
265.159	60530757	C19H18N0O1S0	19	18	0	1	0
265.17	10744900	C18H18N2O0S0	18	18	2	0	0
265.195	27058240	C20H22N0O0S0	20	22	0	0	0
266.063	18800633	C16H9N1O1S1	16	9	1	1	1
266.081	56311801	C16H9N1O3S0	16	9	1	3	0
266.1	14379000	C17H13N1O0S1	17	13	1	0	1
266.118	103727096	C17H13N1O2S0	17	13	1	2	0
266.154	92692471	C18H17N1O1S0	18	17	1	1	0
266.175	6756343	C15H21N1O3S0	15	21	1	3	0
266.19	40013814	C19H21N1O0S0	19	21	1	0	0
267.047	21475355	C16H8N0O2S1	16	8	0	2	1
267.065	45678621	C16H8N0O4S0	16	8	0	4	0
267.076	18677790	C15H8N2O3S0	15	8	2	3	0
267.08	7168031	C20H8N0O1S0	20	8	0	1	0
267.084	21751839	C17H12N0O1S1	17	12	0	1	1
267.102	107724833	C17H12N0O3S0	17	12	0	3	0
267.113	33906722	C16H12N2O2S0	16	12	2	2	0
267.117	74711075	C21H12N0O0S0	21	12	0	0	0
267.12	40439843	C18H16N0O0S1	18	16	0	0	1
267.138	57753637	C18H16N0O2S0	18	16	0	2	0
267.149	22915110	C17H16N2O1S0	17	16	2	1	0
267.174	25477161	C19H20N0O1S0	19	20	0	1	0
267.186	7997483	C18H20N2O0S0	18	20	2	0	0
267.211	17405998	C20H24N0O0S0	20	24	0	0	0
268.002	6450361	C17H-1N1O3S0	17	-1	1	3	0
268.079	26964171	C16H11N1O1S1	16	11	1	1	1
268.097	80167119	C16H11N1O3S0	16	11	1	3	0
268.112	12316882	C20H11N1O0S0	20	11	1	0	0
268.115	15661267	C17H15N1O0S1	17	15	1	0	1
268.133	91152600	C17H15N1O2S0	17	15	1	2	0
268.17	84312289	C18H19N1O1S0	18	19	1	1	0
268.206	36606186	C19H23N1O0S0	19	23	1	0	0
269.063	30937587	C16H10N0O2S1	16	10	0	2	1
269.081	57623033	C16H10N0O4S0	16	10	0	4	0
269.092	25039357	C15H10N2O3S0	15	10	2	3	0
269.096	49947135	C20H10N0O1S0	20	10	0	1	0
269.099	14737920	C17H14N0O1S1	17	14	0	1	1
269.117	67822087	C17H14N0O3S0	17	14	0	3	0
269.128	28037643	C16H14N2O2S0	16	14	2	2	0
269.132	131924492	C21H14N0O0S0	21	14	0	0	0
269.137	15516174	C18H18N0O0S1	18	18	0	0	1
269.154	27988500	C18H18N0O2S0	18	18	0	2	0
269.165	13098520	C17H18N2O1S0	17	18	2	1	0
269.19	9330210	C19H22N0O1S0	19	22	0	1	0
269.201	6274086	C18H22N2O0S0	18	22	2	0	0
269.226	4802096	C20H26N0O0S0	20	26	0	0	0
270.091	14840744	C19H9N1O1S0	19	9	1	1	0
270.095	24179626	C16H13N1O1S1	16	13	1	1	1
270.112	55329714	C16H13N1O3S0	16	13	1	3	0
270.128	27161530	C20H13N1O0S0	20	13	1	0	0
270.131	17976251	C17H17N1O0S1	17	17	1	0	1
270.149	63570884	C17H17N1O2S0	17	17	1	2	0
270.185	50938838	C18H21N1O1S0	18	21	1	1	0
270.222	19278824	C19H25N1O0S0	19	25	1	0	0
271.058	15758772	C19H8N0O0S1	19	8	0	0	1
271.075	25425343	C19H8N0O2S0	19	8	0	2	0
271.079	21423553	C16H12N0O2S1	16	12	0	2	1
271.096	36689355	C16H12N0O4S0	16	12	0	4	0
271.108	16840146	C15H12N2O3S0	15	12	2	3	0
271.112	82224597	C20H12N0O1S0	20	12	0	1	0
271.133	38069729	C17H16N0O3S0	17	16	0	3	0
271.144	15330792	C16H16N2O2S0	16	16	2	2	0
271.148	117638635	C21H16N0O0S0	21	16	0	0	0
271.152	10916333	C18H20N0O0S1	18	20	0	0	1
271.169	10325495	C18H20N0O2S0	18	20	0	2	0
271.18	10370558	C17H20N2O1S0	17	20	2	1	0
271.206	3976718	C19H24N0O1S0	19	24	0	1	0
272.071	7939145	C18H7N1O2S0	18	7	1	2	0
272.107	40777826	C19H11N1O1S0	19	11	1	1	0
272.11	13150309	C16H15N1O1S1	16	15	1	1	1
272.128	41044081	C16H15N1O3S0	16	15	1	3	0
272.143	49801340	C20H15N1O0S0	20	15	1	0	0
272.147	7959679	C17H19N1O0S1	17	19	1	0	1
272.164	53053579	C17H19N1O2S0	17	19	1	2	0
272.201	45967525	C18H23N1O1S0	18	23	1	1	0
272.237	6359232	C19H27N1O0S0	19	27	1	0	0
273.055	9700145	C18H6N0O3S0	18	6	0	3	0
273.073	28441408	C19H10N0O0S1	19	10	0	0	1
273.091	77114190	C19H10N0O2S0	19	10	0	2	0
273.094	10222417	C16H14N0O2S1	16	14	0	2	1
273.102	9672535	C18H10N2O1S0	18	10	2	1	0
273.112	24738655	C16H14N0O4S0	16	14	0	4	0
273.123	14809961	C15H14N2O3S0	15	14	2	3	0
273.127	145247084	C20H14N0O1S0	20	14	0	1	0
273.139	6221685	C19H14N2O0S0	19	14	2	0	0
273.149	18887549	C17H18N0O3S0	17	18	0	3	0
273.16	12786566	C16H18N2O2S0	16	18	2	2	0
273.164	113068937	C21H18N0O0S0	21	18	0	0	0
273.196	7565220	C17H22N2O1S0	17	22	2	1	0
274.086	33898147	C18H9N1O2S0	18	9	1	2	0
274.123	97357508	C19H13N1O1S0	19	13	1	1	0
274.126	10981063	C16H17N1O1S1	16	17	1	1	1
274.144	30547671	C16H17N1O3S0	16	17	1	3	0
274.159	48967397	C20H17N1O0S0	20	17	1	0	0
274.162	9058024	C17H21N1O0S1	17	21	1	0	1
274.18	41377528	C17H21N1O2S0	17	21	1	2	0
274.217	27725594	C18H25N1O1S0	18	25	1	1	0
275.034	5580323	C17H4N0O4S0	17	4	0	4	0
275.053	10469942	C18H8N0O1S1	18	8	0	1	1
275.07	42361415	C18H8N0O3S0	18	8	0	3	0
275.081	8513106	C17H8N2O2S0	17	8	2	2	0
275.089	72258138	C19H12N0O0S1	19	12	0	0	1
275.107	120459883	C19H12N0O2S0	19	12	0	2	0
275.11	4436591	C16H16N0O2S1	16	16	0	2	1
275.118	18664055	C18H12N2O1S0	18	12	2	1	0
275.128	9072256	C16H16N0O4S0	16	16	0	4	0
275.139	8709771	C15H16N2O3S0	15	16	2	3	0
275.143	113283728	C20H16N0O1S0	20	16	0	1	0
275.154	8129179	C19H16N2O0S0	19	16	2	0	0
275.164	3810469	C17H20N0O3S0	17	20	0	3	0
275.175	9634480	C16H20N2O2S0	16	20	2	2	0
275.179	72954548	C21H20N0O0S0	21	20	0	0	0
276.066	15967818	C17H7N1O3S0	17	7	1	3	0
276.084	4621406	C18H11N1O0S1	18	11	1	0	1
276.102	69408369	C18H11N1O2S0	18	11	1	2	0
276.138	88987288	C19H15N1O1S0	19	15	1	1	0
276.142	5496476	C16H19N1O1S1	16	19	1	1	1
276.159	20649647	C16H19N1O3S0	16	19	1	3	0
276.175	40351424	C20H19N1O0S0	20	19	1	0	0
276.196	19060438	C17H23N1O2S0	17	23	1	2	0
276.232	11022078	C18H27N1O1S0	18	27	1	1	0
277.032	5765754	C17H6N0O2S1	17	6	0	2	1
277.05	16757390	C17H6N0O4S0	17	6	0	4	0
277.064	4509343	C21H6N0O1S0	21	6	0	1	0
277.068	14097059	C18H10N0O1S1	18	10	0	1	1
277.086	80804536	C18H10N0O3S0	18	10	0	3	0
277.097	18549445	C17H10N2O2S0	17	10	2	2	0
277.101	14418633	C22H10N0O0S0	22	10	0	0	0
277.105	51329741	C19H14N0O0S1	19	14	0	0	1
277.122	112974562	C19H14N0O2S0	19	14	0	2	0
277.134	19702511	C18H14N2O1S0	18	14	2	1	0
277.154	3825926	C15H18N2O3S0	15	18	2	3	0
277.159	63314700	C20H18N0O1S0	20	18	0	1	0
277.17	8754969	C19H18N2O0S0	19	18	2	0	0
277.191	5092145	C16H22N2O2S0	16	22	2	2	0
277.195	32451382	C21H22N0O0S0	21	22	0	0	0
278.063	9279292	C17H9N1O1S1	17	9	1	1	1
278.081	39468882	C17H9N1O3S0	17	9	1	3	0
278.1	8349545	C18H13N1O0S1	18	13	1	0	1
278.118	80265086	C18H13N1O2S0	18	13	1	2	0
278.154	80322475	C19H17N1O1S0	19	17	1	1	0
278.175	9326533	C16H21N1O3S0	16	21	1	3	0
278.19	31236055	C20H21N1O0S0	20	21	1	0	0
278.212	3857905	C17H25N1O2S0	17	25	1	2	0
279.047	14330888	C17H8N0O2S1	17	8	0	2	1
279.065	39265311	C17H8N0O4S0	17	8	0	4	0
279.076	13915181	C16H8N2O3S0	16	8	2	3	0
279.08	4216626	C21H8N0O1S0	21	8	0	1	0
279.084	22371383	C18H12N0O1S1	18	12	0	1	1
279.102	93070413	C18H12N0O3S0	18	12	0	3	0
279.113	26891356	C17H12N2O2S0	17	12	2	2	0
279.117	41694305	C22H12N0O0S0	22	12	0	0	0
279.12	46916709	C19H16N0O0S1	19	16	0	0	1
279.138	85484668	C19H16N0O2S0	19	16	0	2	0
279.149	21689483	C18H16N2O1S0	18	16	2	1	0
279.174	30471339	C20H20N0O1S0	20	20	0	1	0
279.186	8225977	C19H20N2O0S0	19	20	2	0	0
279.211	19696858	C21H24N0O0S0	21	24	0	0	0
280.079	19603789	C17H11N1O1S1	17	11	1	1	1
280.097	66021733	C17H11N1O3S0	17	11	1	3	0
280.112	6154617	C21H11N1O0S0	21	11	1	0	0
280.115	9978238	C18H15N1O0S1	18	15	1	0	1
280.133	83995030	C18H15N1O2S0	18	15	1	2	0
280.17	72763846	C19H19N1O1S0	19	19	1	1	0
280.206	26577399	C20H23N1O0S0	20	23	1	0	0
281.063	25132681	C17H10N0O2S1	17	10	0	2	1
281.081	53005985	C17H10N0O4S0	17	10	0	4	0
281.092	23310001	C16H10N2O3S0	16	10	2	3	0
281.096	20911798	C21H10N0O1S0	21	10	0	1	0
281.1	12552892	C18H14N0O1S1	18	14	0	1	1
281.117	89845460	C18H14N0O3S0	18	14	0	3	0
281.128	26574563	C17H14N2O2S0	17	14	2	2	0
281.132	84242153	C22H14N0O0S0	22	14	0	0	0
281.136	36364014	C19H18N0O0S1	19	18	0	0	1
281.154	40128262	C19H18N0O2S0	19	18	0	2	0
281.165	15144726	C18H18N2O1S0	18	18	2	1	0
281.19	12902201	C20H22N0O1S0	20	22	0	1	0
281.201	5696328	C19H22N2O0S0	19	22	2	0	0
281.226	10634091	C21H26N0O0S0	21	26	0	0	0
282.091	9226288	C20H9N1O1S0	20	9	1	1	0
282.095	20517941	C17H13N1O1S1	17	13	1	1	1
282.112	73585743	C17H13N1O3S0	17	13	1	3	0
282.128	18916452	C21H13N1O0S0	21	13	1	0	0
282.131	11078761	C18H17N1O0S1	18	17	1	0	1
282.149	74822787	C18H17N1O2S0	18	17	1	2	0
282.185	56333495	C19H21N1O1S0	19	21	1	1	0
282.222	19612907	C20H25N1O0S0	20	25	1	0	0
283.075	15299010	C20H8N0O2S0	20	8	0	2	0
283.079	23275975	C17H12N0O2S1	17	12	0	2	1
283.096	50870753	C17H12N0O4S0	17	12	0	4	0
283.108	26335729	C16H12N2O3S0	16	12	2	3	0
283.112	64715255	C21H12N0O1S0	21	12	0	1	0
283.116	14895613	C18H16N0O1S1	18	16	0	1	1
283.133	43915798	C18H16N0O3S0	18	16	0	3	0
283.144	19458599	C17H16N2O2S0	17	16	2	2	0
283.148	101890604	C22H16N0O0S0	22	16	0	0	0
283.152	13825586	C19H20N0O0S1	19	20	0	0	1
283.169	18321995	C19H20N0O2S0	19	20	0	2	0
283.18	11778652	C18H20N2O1S0	18	20	2	1	0
283.206	4872321	C20H24N0O1S0	20	24	0	1	0
284.071	4253572	C19H7N1O2S0	19	7	1	2	0
284.107	30785467	C20H11N1O1S0	20	11	1	1	0
284.11	16621504	C17H15N1O1S1	17	15	1	1	1
284.128	47341530	C17H15N1O3S0	17	15	1	3	0
284.143	28270577	C21H15N1O0S0	21	15	1	0	0
284.147	12128246	C18H19N1O0S1	18	19	1	0	1
284.164	55926801	C18H19N1O2S0	18	19	1	2	0
284.201	43728967	C19H23N1O1S0	19	23	1	1	0
284.237	11178110	C20H27N1O0S0	20	27	1	0	0
285.055	5164881	C19H6N0O3S0	19	6	0	3	0
285.073	22410605	C20H10N0O0S1	20	10	0	0	1
285.091	44639624	C20H10N0O2S0	20	10	0	2	0
285.094	10528141	C17H14N0O2S1	17	14	0	2	1
285.102	6495129	C19H10N2O1S0	19	10	2	1	0
285.112	31651240	C17H14N0O4S0	17	14	0	4	0
285.123	15936953	C16H14N2O3S0	16	14	2	3	0
285.127	86377919	C21H14N0O1S0	21	14	0	1	0
285.149	27534816	C18H18N0O3S0	18	18	0	3	0
285.16	13254129	C17H18N2O2S0	17	18	2	2	0
285.164	84248055	C22H18N0O0S0	22	18	0	0	0
285.167	12569084	C19H22N0O0S1	19	22	0	0	1
285.185	6687255	C19H22N0O2S0	19	22	0	2	0
285.196	8396328	C18H22N2O1S0	18	22	2	1	0
286.086	15666043	C19H9N1O2S0	19	9	1	2	0
286.123	58936243	C20H13N1O1S0	20	13	1	1	0
286.126	10119096	C17H17N1O1S1	17	17	1	1	1
286.144	29809619	C17H17N1O3S0	17	17	1	3	0
286.159	38444011	C21H17N1O0S0	21	17	1	0	0
286.162	9731056	C18H21N1O0S1	18	21	1	0	1
286.18	48270347	C18H21N1O2S0	18	21	1	2	0
286.217	30981187	C19H25N1O1S0	19	25	1	1	0
287.053	5960015	C19H8N0O1S1	19	8	0	1	1
287.07	23155050	C19H8N0O3S0	19	8	0	3	0
287.082	4721020	C18H8N2O2S0	18	8	2	2	0
287.089	34152839	C20H12N0O0S1	20	12	0	0	1
287.107	77009315	C20H12N0O2S0	20	12	0	2	0
287.11	6007720	C17H16N0O2S1	17	16	0	2	1
287.118	9232820	C19H12N2O1S0	19	12	2	1	0
287.128	15471043	C17H16N0O4S0	17	16	0	4	0
287.139	9642453	C16H16N2O3S0	16	16	2	3	0
287.143	91443675	C21H16N0O1S0	21	16	0	1	0
287.154	8806892	C20H16N2O0S0	20	16	2	0	0
287.164	9701884	C18H20N0O3S0	18	20	0	3	0
287.175	9695757	C17H20N2O2S0	17	20	2	2	0
287.179	54702611	C22H20N0O0S0	22	20	0	0	0
288.066	7818099	C18H7N1O3S0	18	7	1	3	0
288.084	4209552	C19H11N1O0S1	19	11	1	0	1
288.102	45168555	C19H11N1O2S0	19	11	1	2	0
288.138	69474276	C20H15N1O1S0	20	15	1	1	0
288.142	7086057	C17H19N1O1S1	17	19	1	1	1
288.159	21272581	C17H19N1O3S0	17	19	1	3	0
288.175	34691100	C21H19N1O0S0	21	19	1	0	0
288.178	4689441	C18H23N1O0S1	18	23	1	0	1
288.196	27535421	C18H23N1O2S0	18	23	1	2	0
288.232	8456310	C19H27N1O1S0	19	27	1	1	0
289.05	12537196	C18H6N0O4S0	18	6	0	4	0
289.068	10849673	C19H10N0O1S1	19	10	0	1	1
289.086	53444004	C19H10N0O3S0	19	10	0	3	0
289.097	14108086	C18H10N2O2S0	18	10	2	2	0
289.101	12920252	C23H10N0O0S0	23	10	0	0	0
289.105	52968897	C20H14N0O0S1	20	14	0	0	1
289.122	90971613	C20H14N0O2S0	20	14	0	2	0
289.134	13829614	C19H14N2O1S0	19	14	2	1	0
289.143	5045757	C17H18N0O4S0	17	18	0	4	0
289.155	5359119	C16H18N2O3S0	16	18	2	3	0
289.159	63069717	C21H18N0O1S0	21	18	0	1	0
289.17	4035111	C20H18N2O0S0	20	18	2	0	0
289.191	8064583	C17H22N2O2S0	17	22	2	2	0
289.195	34643534	C22H22N0O0S0	22	22	0	0	0
290.063	6311310	C18H9N1O1S1	18	9	1	1	1
290.081	29078441	C18H9N1O3S0	18	9	1	3	0
290.1	5787590	C19H13N1O0S1	19	13	1	0	1
290.118	76342242	C19H13N1O2S0	19	13	1	2	0
290.154	69149722	C20H17N1O1S0	20	17	1	1	0
290.157	5297183	C17H21N1O1S1	17	21	1	1	1
290.175	15422522	C17H21N1O3S0	17	21	1	3	0
290.19	23917650	C21H21N1O0S0	21	21	1	0	0
290.211	12098674	C18H25N1O2S0	18	25	1	2	0
290.248	4914346	C19H29N1O1S0	19	29	1	1	0
291.047	8753527	C18H8N0O2S1	18	8	0	2	1
291.065	28141970	C18H8N0O4S0	18	8	0	4	0
291.078	12712358	C17H8N2O3S0	17	8	2	3	0
291.08	5905832	C22H8N0O1S0	22	8	0	1	0
291.084	13951407	C19H12N0O1S1	19	12	0	1	1
291.102	82651594	C19H12N0O3S0	19	12	0	3	0
291.113	23857627	C18H12N2O2S0	18	12	2	2	0
291.117	19614177	C23H12N0O0S0	23	12	0	0	0
291.12	37607910	C20H16N0O0S1	20	16	0	0	1
291.138	80865793	C20H16N0O2S0	20	16	0	2	0
291.149	18467346	C19H16N2O1S0	19	16	2	1	0
291.174	37280313	C21H20N0O1S0	21	20	0	1	0
291.186	5899850	C20H20N2O0S0	20	20	2	0	0
291.211	28564081	C22H24N0O0S0	22	24	0	0	0
292.079	13549463	C18H11N1O1S1	18	11	1	1	1
292.097	57143218	C18H11N1O3S0	18	11	1	3	0
292.115	7105486	C19H15N1O0S1	19	15	1	0	1
292.133	83472360	C19H15N1O2S0	19	15	1	2	0
292.17	65089567	C20H19N1O1S0	20	19	1	1	0
292.191	6934591	C17H23N1O3S0	17	23	1	3	0
292.206	24617046	C21H23N1O0S0	21	23	1	0	0
293.063	16774487	C18H10N0O2S1	18	10	0	2	1
293.081	55137649	C18H10N0O4S0	18	10	0	4	0
293.092	21394817	C17H10N2O3S0	17	10	2	3	0
293.096	10579335	C22H10N0O1S0	22	10	0	1	0
293.099	18085260	C19H14N0O1S1	19	14	0	1	1
293.117	78886311	C19H14N0O3S0	19	14	0	3	0
293.128	25154999	C18H14N2O2S0	18	14	2	2	0
293.132	48141757	C23H14N0O0S0	23	14	0	0	0
293.136	27600322	C20H18N0O0S1	20	18	0	0	1
293.154	54269404	C20H18N0O2S0	20	18	0	2	0
293.165	17442285	C19H18N2O1S0	19	18	2	1	0
293.19	18763282	C21H22N0O1S0	21	22	0	1	0
293.201	5478947	C20H22N2O0S0	20	22	2	0	0
293.226	15531592	C22H26N0O0S0	22	26	0	0	0
294.091	4676408	C21H9N1O1S0	21	9	1	1	0
294.095	20114237	C18H13N1O1S1	18	13	1	1	1
294.112	72719191	C18H13N1O3S0	18	13	1	3	0
294.128	7555949	C22H13N1O0S0	22	13	1	0	0
294.131	7252850	C19H17N1O0S1	19	17	1	0	1
294.149	84769676	C19H17N1O2S0	19	17	1	2	0
294.185	62913472	C20H21N1O1S0	20	21	1	1	0
294.222	18967541	C21H25N1O0S0	21	25	1	0	0
295.058	4642460	C21H8N0O0S1	21	8	0	0	1
295.075	5087413	C21H8N0O2S0	21	8	0	2	0
295.079	20340922	C18H12N0O2S1	18	12	0	2	1
295.096	58704083	C18H12N0O4S0	18	12	0	4	0
295.108	25690339	C17H12N2O3S0	17	12	2	3	0
295.112	38146280	C22H12N0O1S0	22	12	0	1	0
295.116	11420910	C19H16N0O1S1	19	16	0	1	1
295.133	64659718	C19H16N0O3S0	19	16	0	3	0
295.144	20152598	C18H16N2O2S0	18	16	2	2	0
295.148	64192795	C23H16N0O0S0	23	16	0	0	0
295.151	20470048	C20H20N0O0S1	20	20	0	0	1
295.169	25182521	C20H20N0O2S0	20	20	0	2	0
295.18	13046089	C19H20N2O1S0	19	20	2	1	0
295.206	10289516	C21H24N0O1S0	21	24	0	1	0
295.242	7181727	C22H28N0O0S0	22	28	0	0	0
296.107	12523080	C21H11N1O1S0	21	11	1	1	0
296.11	16258637	C18H15N1O1S1	18	15	1	1	1
296.128	63841893	C18H15N1O3S0	18	15	1	3	0
296.143	17084026	C22H15N1O0S0	22	15	1	0	0
296.147	7789182	C19H19N1O0S1	19	19	1	0	1
296.164	64186006	C19H19N1O2S0	19	19	1	2	0
296.201	46827208	C20H23N1O1S0	20	23	1	1	0
296.237	12422905	C21H27N1O0S0	21	27	1	0	0
297.073	7506769	C21H10N0O0S1	21	10	0	0	1
297.091	27528040	C21H10N0O2S0	21	10	0	2	0
297.094	14418796	C18H14N0O2S1	18	14	0	2	1
297.112	43854724	C18H14N0O4S0	18	14	0	4	0
297.123	20163474	C17H14N2O3S0	17	14	2	3	0
297.127	68914071	C22H14N0O1S0	22	14	0	1	0
297.131	12073885	C19H18N0O1S1	19	18	0	1	1
297.149	34450355	C19H18N0O3S0	19	18	0	3	0
297.16	14392258	C18H18N2O2S0	18	18	2	2	0
297.164	65194951	C23H18N0O0S0	23	18	0	0	0
297.185	8625122	C20H22N0O2S0	20	22	0	2	0
297.196	11680753	C19H22N2O1S0	19	22	2	1	0
298.086	10194015	C20H9N1O2S0	20	9	1	2	0
298.123	36122764	C21H13N1O1S0	21	13	1	1	0
298.126	14282897	C18H17N1O1S1	18	17	1	1	1
298.144	40693927	C18H17N1O3S0	18	17	1	3	0
298.159	27521210	C22H17N1O0S0	22	17	1	0	0
298.162	7549118	C19H21N1O0S1	19	21	1	0	1
298.18	49098964	C19H21N1O2S0	19	21	1	2	0
298.217	31768833	C20H25N1O1S0	20	25	1	1	0
298.253	8545582	C21H29N1O0S0	21	29	1	0	0
299.053	3869430	C20H8N0O1S1	20	8	0	1	1
299.07	14359819	C20H8N0O3S0	20	8	0	3	0
299.089	25834785	C21H12N0O0S1	21	12	0	0	1
299.107	55964982	C21H12N0O2S0	21	12	0	2	0
299.11	6929722	C18H16N0O2S1	18	16	0	2	1
299.118	7287107	C20H12N2O1S0	20	12	2	1	0
299.128	21538126	C18H16N0O4S0	18	16	0	4	0
299.139	12627292	C17H16N2O3S0	17	16	2	3	0
299.143	73028960	C22H16N0O1S0	22	16	0	1	0
299.164	16123257	C19H20N0O3S0	19	20	0	3	0
299.175	11582855	C18H20N2O2S0	18	20	2	2	0
299.179	48412043	C23H20N0O0S0	23	20	0	0	0
299.212	6669745	C19H24N2O1S0	19	24	2	1	0
300.066	5375363	C19H7N1O3S0	19	7	1	3	0
300.102	28907948	C20H11N1O2S0	20	11	1	2	0
300.138	58759636	C21H15N1O1S0	21	15	1	1	0
300.142	7787992	C18H19N1O1S1	18	19	1	1	1
300.159	30169580	C18H19N1O3S0	18	19	1	3	0
300.175	26503677	C22H19N1O0S0	22	19	1	0	0
300.178	5900800	C19H23N1O0S1	19	23	1	0	1
300.196	40598036	C19H23N1O2S0	19	23	1	2	0
300.232	19761724	C20H27N1O1S0	20	27	1	1	0
301.05	6821297	C19H6N0O4S0	19	6	0	4	0
301.068	10252741	C20H10N0O1S1	20	10	0	1	1
301.086	39869911	C20H10N0O3S0	20	10	0	3	0
301.097	9680355	C19H10N2O2S0	19	10	2	2	0
301.105	39005675	C21H14N0O0S1	21	14	0	0	1
301.122	76488190	C21H14N0O2S0	21	14	0	2	0
301.126	4589313	C18H18N0O2S1	18	18	0	2	1
301.133	10618378	C20H14N2O1S0	20	14	2	1	0
301.143	9428500	C18H18N0O4S0	18	18	0	4	0
301.155	7235104	C17H18N2O3S0	17	18	2	3	0
301.159	56401444	C22H18N0O1S0	22	18	0	1	0
301.17	5129776	C21H18N2O0S0	21	18	2	0	0
301.18	6363706	C19H22N0O3S0	19	22	0	3	0
301.191	7564870	C18H22N2O2S0	18	22	2	2	0
301.195	30551626	C23H22N0O0S0	23	22	0	0	0
302.081	17635797	C19H9N1O3S0	19	9	1	3	0
302.1	7138791	C20H13N1O0S1	20	13	1	0	1
302.118	46318073	C20H13N1O2S0	20	13	1	2	0
302.154	61891101	C21H17N1O1S0	21	17	1	1	0
302.157	5592609	C18H21N1O1S1	18	21	1	1	1
302.175	21975602	C18H21N1O3S0	18	21	1	3	0
302.19	21369409	C22H21N1O0S0	22	21	1	0	0
302.211	23691862	C19H25N1O2S0	19	25	1	2	0
302.248	8194682	C20H29N1O1S0	20	29	1	1	0
303.047	6389119	C19H8N0O2S1	19	8	0	2	1
303.065	22054288	C19H8N0O4S0	19	8	0	4	0
303.076	5362075	C18H8N2O3S0	18	8	2	3	0
303.084	13628833	C20H12N0O1S1	20	12	0	1	1
303.102	59467186	C20H12N0O3S0	20	12	0	3	0
303.113	18077117	C19H12N2O2S0	19	12	2	2	0
303.117	9311681	C24H12N0O0S0	24	12	0	0	0
303.12	35431876	C21H16N0O0S1	21	16	0	0	1
303.138	74081748	C21H16N0O2S0	21	16	0	2	0
303.149	11523551	C20H16N2O1S0	20	16	2	1	0
303.174	34440695	C22H20N0O1S0	22	20	0	1	0
303.207	4184597	C18H24N2O2S0	18	24	2	2	0
303.211	22939161	C23H24N0O0S0	23	24	0	0	0
304.079	7483698	C19H11N1O1S1	19	11	1	1	1
304.097	44812610	C19H11N1O3S0	19	11	1	3	0
304.115	4253011	C20H15N1O0S1	20	15	1	0	1
304.133	68135267	C20H15N1O2S0	20	15	1	2	0
304.17	52783491	C21H19N1O1S0	21	19	1	1	0
304.191	13996438	C18H23N1O3S0	18	23	1	3	0
304.206	22112675	C22H23N1O0S0	22	23	1	0	0
304.227	7534006	C19H27N1O2S0	19	27	1	2	0
305.063	9708681	C19H10N0O2S1	19	10	0	2	1
305.081	41036952	C19H10N0O4S0	19	10	0	4	0
305.092	14374049	C18H10N2O3S0	18	10	2	3	0
305.096	6493349	C23H10N0O1S0	23	10	0	1	0
305.099	10534056	C20H14N0O1S1	20	14	0	1	1
305.117	67046583	C20H14N0O3S0	20	14	0	3	0
305.128	19803328	C19H14N2O2S0	19	14	2	2	0
305.132	18828483	C24H14N0O0S0	24	14	0	0	0
305.136	26297542	C21H18N0O0S1	21	18	0	0	1
305.154	52153557	C21H18N0O2S0	21	18	0	2	0
305.165	13325535	C20H18N2O1S0	20	18	2	1	0
305.19	24403188	C22H22N0O1S0	22	22	0	1	0
305.226	25038098	C23H26N0O0S0	23	26	0	0	0
306.095	12582873	C19H13N1O1S1	19	13	1	1	1
306.112	59142119	C19H13N1O3S0	19	13	1	3	0
306.131	4570614	C20H17N1O0S1	20	17	1	0	1
306.149	72257540	C20H17N1O2S0	20	17	1	2	0
306.185	51613729	C21H21N1O1S0	21	21	1	1	0
306.206	6719538	C18H25N1O3S0	18	25	1	3	0
306.222	19562558	C22H25N1O0S0	22	25	1	0	0
307.079	16100055	C19H12N0O2S1	19	12	0	2	1
307.096	44094181	C19H12N0O4S0	19	12	0	4	0
307.108	21947117	C18H12N2O3S0	18	12	2	3	0
307.112	14451440	C23H12N0O1S0	23	12	0	1	0
307.116	13460211	C20H16N0O1S1	20	16	0	1	1
307.133	56644352	C20H16N0O3S0	20	16	0	3	0
307.144	18637577	C19H16N2O2S0	19	16	2	2	0
307.148	31384332	C24H16N0O0S0	24	16	0	0	0
307.152	17553167	C21H20N0O0S1	21	20	0	0	1
307.169	31724316	C21H20N0O2S0	21	20	0	2	0
307.18	9938724	C20H20N2O1S0	20	20	2	1	0
307.206	12641079	C22H24N0O1S0	22	24	0	1	0
307.242	9304915	C23H28N0O0S0	23	28	0	0	0
308.107	4685264	C22H11N1O1S0	22	11	1	1	0
308.11	11881938	C19H15N1O1S1	19	15	1	1	1
308.128	55457247	C19H15N1O3S0	19	15	1	3	0
308.143	8548842	C23H15N1O0S0	23	15	1	0	0
308.147	6309868	C20H19N1O0S1	20	19	1	0	1
308.165	60790265	C20H19N1O2S0	20	19	1	2	0
308.201	42694163	C21H23N1O1S0	21	23	1	1	0
308.237	11042349	C22H27N1O0S0	22	27	1	0	0
309.073	5419639	C22H10N0O0S1	22	10	0	0	1
309.091	10184836	C22H10N0O2S0	22	10	0	2	0
309.094	13183110	C19H14N0O2S1	19	14	0	2	1
309.112	36382866	C19H14N0O4S0	19	14	0	4	0
309.123	21694618	C18H14N2O3S0	18	14	2	3	0
309.127	33958045	C23H14N0O1S0	23	14	0	1	0
309.132	10057887	C20H18N0O1S1	20	18	0	1	1
309.149	39794859	C20H18N0O3S0	20	18	0	3	0
309.16	13908147	C19H18N2O2S0	19	18	2	2	0
309.164	38459573	C24H18N0O0S0	24	18	0	0	0
309.185	12062916	C21H22N0O2S0	21	22	0	2	0
309.196	9160908	C20H22N2O1S0	20	22	2	1	0
309.221	6795485	C22H26N0O1S0	22	26	0	1	0
309.258	5115126	C23H30N0O0S0	23	30	0	0	0
310.086	3922720	C21H9N1O2S0	21	9	1	2	0
310.123	19276599	C22H13N1O1S0	22	13	1	1	0
310.126	7115578	C19H17N1O1S1	19	17	1	1	1
310.144	43440965	C19H17N1O3S0	19	17	1	3	0
310.159	15643471	C23H17N1O0S0	23	17	1	0	0
310.162	7421777	C20H21N1O0S1	20	21	1	0	1
310.18	50019165	C20H21N1O2S0	20	21	1	2	0
310.217	35404661	C21H25N1O1S0	21	25	1	1	0
310.253	6723469	C22H29N1O0S0	22	29	1	0	0
311.07	5636504	C21H8N0O3S0	21	8	0	3	0
311.089	10055076	C22H12N0O0S1	22	12	0	0	1
311.107	28851631	C22H12N0O2S0	22	12	0	2	0
311.11	7654833	C19H16N0O2S1	19	16	0	2	1
311.128	26627516	C19H16N0O4S0	19	16	0	4	0
311.139	16833987	C18H16N2O3S0	18	16	2	3	0
311.143	45858246	C23H16N0O1S0	23	16	0	1	0
311.164	20823507	C20H20N0O3S0	20	20	0	3	0
311.175	11705818	C19H20N2O2S0	19	20	2	2	0
311.179	37469660	C24H20N0O0S0	24	20	0	0	0
311.2	5091818	C21H24N0O2S0	21	24	0	2	0
311.212	8285681	C20H24N2O1S0	20	24	2	1	0
311.237	4715520	C22H28N0O1S0	22	28	0	1	0
312.102	14888980	C21H11N1O2S0	21	11	1	2	0
312.138	30601258	C22H15N1O1S0	22	15	1	1	0
312.142	6661164	C19H19N1O1S1	19	19	1	1	1
312.159	33333303	C19H19N1O3S0	19	19	1	3	0
312.175	16431168	C23H19N1O0S0	23	19	1	0	0
312.196	39862348	C20H23N1O2S0	20	23	1	2	0
312.232	26763362	C21H27N1O1S0	21	27	1	1	0
312.269	3989624	C22H31N1O0S0	22	31	1	0	0
313.086	26128988	C21H10N0O3S0	21	10	0	3	0
313.097	4306531	C20H10N2O2S0	20	10	2	2	0
313.105	23536231	C22H14N0O0S1	22	14	0	0	1
313.122	48251506	C22H14N0O2S0	22	14	0	2	0
313.134	6158968	C21H14N2O1S0	21	14	2	1	0
313.143	15440510	C19H18N0O4S0	19	18	0	4	0
313.155	7967364	C18H18N2O3S0	18	18	2	3	0
313.159	39944839	C23H18N0O1S0	23	18	0	1	0
313.18	12616339	C20H22N0O3S0	20	22	0	3	0
313.191	6963866	C19H22N2O2S0	19	22	2	2	0
313.195	25195164	C24H22N0O0S0	24	22	0	0	0
314.081	13552793	C20H9N1O3S0	20	9	1	3	0
314.118	32019629	C21H13N1O2S0	21	13	1	2	0
314.154	45057218	C22H17N1O1S0	22	17	1	1	0
314.157	8038596	C19H21N1O1S1	19	21	1	1	1
314.175	28787918	C19H21N1O3S0	19	21	1	3	0
314.19	16571607	C23H21N1O0S0	23	21	1	0	0
314.194	6037209	C20H25N1O0S1	20	25	1	0	1
314.211	33055971	C20H25N1O2S0	20	25	1	2	0
314.248	12745975	C21H29N1O1S0	21	29	1	1	0
315.065	14927552	C20H8N0O4S0	20	8	0	4	0
315.077	4700358	C19H8N2O3S0	19	8	2	3	0
315.084	10375882	C21H12N0O1S1	21	12	0	1	1
315.102	46622420	C21H12N0O3S0	21	12	0	3	0
315.113	12377818	C20H12N2O2S0	20	12	2	2	0
315.12	27436766	C22H16N0O0S1	22	16	0	0	1
315.138	63244008	C22H16N0O2S0	22	16	0	2	0
315.149	11792110	C21H16N2O1S0	21	16	2	1	0
315.159	7488244	C19H20N0O4S0	19	20	0	4	0
315.174	34100988	C23H20N0O1S0	23	20	0	1	0
315.195	5143816	C20H24N0O3S0	20	24	0	3	0
315.207	5286670	C19H24N2O2S0	19	24	2	2	0
315.211	21255952	C24H24N0O0S0	24	24	0	0	0
316.079	4833003	C20H11N1O1S1	20	11	1	1	1
316.097	26769653	C20H11N1O3S0	20	11	1	3	0
316.133	49490184	C21H15N1O2S0	21	15	1	2	0
316.17	44165404	C22H19N1O1S0	22	19	1	1	0
316.173	3927326	C19H23N1O1S1	19	23	1	1	1
316.191	18696487	C19H23N1O3S0	19	23	1	3	0
316.206	14682416	C23H23N1O0S0	23	23	1	0	0
316.227	18663739	C20H27N1O2S0	20	27	1	2	0
316.263	6627663	C21H31N1O1S0	21	31	1	1	0
317.063	7573245	C20H10N0O2S1	20	10	0	2	1
317.081	22936327	C20H10N0O4S0	20	10	0	4	0
317.092	8960781	C19H10N2O3S0	19	10	2	3	0
317.099	11727633	C21H14N0O1S1	21	14	0	1	1
317.117	59058970	C21H14N0O3S0	21	14	0	3	0
317.129	13947680	C20H14N2O2S0	20	14	2	2	0
317.132	7718690	C25H14N0O0S0	25	14	0	0	0
317.136	26319652	C22H18N0O0S1	22	18	0	0	1
317.154	49662766	C22H18N0O2S0	22	18	0	2	0
317.165	12032820	C21H18N2O1S0	21	18	2	1	0
317.19	19393345	C23H22N0O1S0	23	22	0	1	0
317.201	4240199	C22H22N2O0S0	22	22	2	0	0
317.21	4355916	C20H26N0O3S0	20	26	0	3	0
317.226	21003093	C24H26N0O0S0	24	26	0	0	0
318.095	7935267	C20H13N1O1S1	20	13	1	1	1
318.112	46656813	C20H13N1O3S0	20	13	1	3	0
318.149	54447424	C21H17N1O2S0	21	17	1	2	0
318.185	41708884	C22H21N1O1S0	22	21	1	1	0
318.206	9123167	C19H25N1O3S0	19	25	1	3	0
318.222	16440679	C23H25N1O0S0	23	25	1	0	0
319.079	7701294	C20H12N0O2S1	20	12	0	2	1
319.096	33877816	C20H12N0O4S0	20	12	0	4	0
319.108	15068990	C19H12N2O3S0	19	12	2	3	0
319.112	8962880	C24H12N0O1S0	24	12	0	1	0
319.116	12101442	C21H16N0O1S1	21	16	0	1	1
319.133	51949387	C21H16N0O3S0	21	16	0	3	0
319.144	17514321	C20H16N2O2S0	20	16	2	2	0
319.148	16418643	C25H16N0O0S0	25	16	0	0	0
319.152	17968981	C22H20N0O0S1	22	20	0	0	1
319.169	28405598	C22H20N0O2S0	22	20	0	2	0
319.18	9197412	C21H20N2O1S0	21	20	2	1	0
319.206	10903410	C23H24N0O1S0	23	24	0	1	0
319.242	18767749	C24H28N0O0S0	24	28	0	0	0
320.11	9705812	C20H15N1O1S1	20	15	1	1	1
320.128	47812957	C20H15N1O3S0	20	15	1	3	0
320.143	4777830	C24H15N1O0S0	24	15	1	0	0
320.164	53383537	C21H19N1O2S0	21	19	1	2	0
320.201	39547268	C22H23N1O1S0	22	23	1	1	0
320.222	5085584	C19H27N1O3S0	19	27	1	3	0
320.237	9036184	C23H27N1O0S0	23	27	1	0	0
321.075	3982170	C23H10N0O0S1	23	10	0	0	1
321.091	9089891	C23H10N0O2S0	23	10	0	2	0
321.094	10166117	C20H14N0O2S1	20	14	0	2	1
321.112	36074351	C20H14N0O4S0	20	14	0	4	0
321.123	15561589	C19H14N2O3S0	19	14	2	3	0
321.127	15717239	C24H14N0O1S0	24	14	0	1	0
321.131	12626809	C21H18N0O1S1	21	18	0	1	1
321.149	34739074	C21H18N0O3S0	21	18	0	3	0
321.16	11975560	C20H18N2O2S0	20	18	2	2	0
321.164	22856587	C25H18N0O0S0	25	18	0	0	0
321.185	14975894	C22H22N0O2S0	22	22	0	2	0
321.196	7454620	C21H22N2O1S0	21	22	2	1	0
321.221	7294890	C23H26N0O1S0	23	26	0	1	0
321.258	5041085	C24H30N0O0S0	24	30	0	0	0
322.123	9868694	C23H13N1O1S0	23	13	1	1	0
322.126	11576728	C20H17N1O1S1	20	17	1	1	1
322.144	50623906	C20H17N1O3S0	20	17	1	3	0
322.159	7933354	C24H17N1O0S0	24	17	1	0	0
322.163	5411756	C21H21N1O0S1	21	21	1	0	1
322.18	50386358	C21H21N1O2S0	21	21	1	2	0
322.217	35603914	C22H25N1O1S0	22	25	1	1	0
322.253	7770590	C23H29N1O0S0	23	29	1	0	0
323.07	4470695	C22H8N0O3S0	22	8	0	3	0
323.089	5863345	C23H12N0O0S1	23	12	0	0	1
323.107	18249659	C23H12N0O2S0	23	12	0	2	0
323.11	7832509	C20H16N0O2S1	20	16	0	2	1
323.128	30332871	C20H16N0O4S0	20	16	0	4	0
323.139	13281229	C19H16N2O3S0	19	16	2	3	0
323.143	27203536	C24H16N0O1S0	24	16	0	1	0
323.147	12892114	C21H20N0O1S1	21	20	0	1	1
323.164	25851868	C21H20N0O3S0	21	20	0	3	0
323.175	10084322	C20H20N2O2S0	20	20	2	2	0
323.179	25769956	C25H20N0O0S0	25	20	0	0	0
323.201	10123248	C22H24N0O2S0	22	24	0	2	0
323.212	7521270	C21H24N2O1S0	21	24	2	1	0
323.273	4171801	C24H32N0O0S0	24	32	0	0	0
324.102	9921013	C22H11N1O2S0	22	11	1	2	0
324.138	15428106	C23H15N1O1S0	23	15	1	1	0
324.142	8812044	C20H19N1O1S1	20	19	1	1	1
324.159	41556502	C20H19N1O3S0	20	19	1	3	0
324.175	10330655	C24H19N1O0S0	24	19	1	0	0
324.196	44857900	C21H23N1O2S0	21	23	1	2	0
324.232	28731969	C22H27N1O1S0	22	27	1	1	0
324.269	5696086	C23H31N1O0S0	23	31	1	0	0
325.086	10279994	C22H10N0O3S0	22	10	0	3	0
325.105	8870981	C23H14N0O0S1	23	14	0	0	1
325.122	31407184	C23H14N0O2S0	23	14	0	2	0
325.133	3982935	C22H14N2O1S0	22	14	2	1	0
325.143	21412957	C20H18N0O4S0	20	18	0	4	0
325.155	10636388	C19H18N2O3S0	19	18	2	3	0
325.159	27991142	C24H18N0O1S0	24	18	0	1	0
325.18	13491315	C21H22N0O3S0	21	22	0	3	0
325.191	8519801	C20H22N2O2S0	20	22	2	2	0
325.195	24325244	C25H22N0O0S0	25	22	0	0	0
325.216	4077705	C22H26N0O2S0	22	26	0	2	0
325.227	7220367	C21H26N2O1S0	21	26	2	1	0
326.081	6512283	C21H9N1O3S0	21	9	1	3	0
326.118	17764018	C22H13N1O2S0	22	13	1	2	0
326.154	21655241	C23H17N1O1S0	23	17	1	1	0
326.157	6018763	C20H21N1O1S1	20	21	1	1	1
326.175	32747222	C20H21N1O3S0	20	21	1	3	0
326.19	11942624	C24H21N1O0S0	24	21	1	0	0
326.211	34262765	C21H25N1O2S0	21	25	1	2	0
326.248	17792772	C22H29N1O1S0	22	29	1	1	0
327.065	7922958	C21H8N0O4S0	21	8	0	4	0
327.084	5596442	C22H12N0O1S1	22	12	0	1	1
327.102	23941414	C22H12N0O3S0	22	12	0	3	0
327.113	4667693	C21H12N2O2S0	21	12	2	2	0
327.12	21782834	C23H16N0O0S1	23	16	0	0	1
327.138	37830974	C23H16N0O2S0	23	16	0	2	0
327.149	5388613	C22H16N2O1S0	22	16	2	1	0
327.159	11346251	C20H20N0O4S0	20	20	0	4	0
327.17	7475539	C19H20N2O3S0	19	20	2	3	0
327.174	25899349	C24H20N0O1S0	24	20	0	1	0
327.195	7111011	C21H24N0O3S0	21	24	0	3	0
327.207	5982571	C20H24N2O2S0	20	24	2	2	0
327.211	15165805	C25H24N0O0S0	25	24	0	0	0
328.097	13298621	C21H11N1O3S0	21	11	1	3	0
328.133	31056854	C22H15N1O2S0	22	15	1	2	0
328.17	26289135	C23H19N1O1S0	23	19	1	1	0
328.191	26219517	C20H23N1O3S0	20	23	1	3	0
328.206	10593288	C24H23N1O0S0	24	23	1	0	0
328.227	28931094	C21H27N1O2S0	21	27	1	2	0
328.263	7865391	C22H31N1O1S0	22	31	1	1	0
329.063	5465695	C21H10N0O2S1	21	10	0	2	1
329.081	18724460	C21H10N0O4S0	21	10	0	4	0
329.092	6440564	C20H10N2O3S0	20	10	2	3	0
329.099	8876665	C22H14N0O1S1	22	14	0	1	1
329.117	39749254	C22H14N0O3S0	22	14	0	3	0
329.128	14468750	C21H14N2O2S0	21	14	2	2	0
329.136	21104275	C23H18N0O0S1	23	18	0	0	1
329.154	42010272	C23H18N0O2S0	23	18	0	2	0
329.165	7646888	C22H18N2O1S0	22	18	2	1	0
329.175	4360879	C20H22N0O4S0	20	22	0	4	0
329.186	5972663	C19H22N2O3S0	19	22	2	3	0
329.19	19551930	C24H22N0O1S0	24	22	0	1	0
329.222	5950161	C20H26N2O2S0	20	26	2	2	0
329.226	16656084	C25H26N0O0S0	25	26	0	0	0
330.112	30689632	C21H13N1O3S0	21	13	1	3	0
330.131	4173166	C22H17N1O0S1	22	17	1	0	1
330.149	46918012	C22H17N1O2S0	22	17	1	2	0
330.185	33941911	C23H21N1O1S0	23	21	1	1	0
330.206	19069351	C20H25N1O3S0	20	25	1	3	0
330.222	12241331	C24H25N1O0S0	24	25	1	0	0
330.243	13765059	C21H29N1O2S0	21	29	1	2	0
330.279	5326302	C22H33N1O1S0	22	33	1	1	0
331.096	23747672	C21H12N0O4S0	21	12	0	4	0
331.108	11658337	C20H12N2O3S0	20	12	2	3	0
331.115	5814887	C22H16N0O1S1	22	16	0	1	1
331.133	39595125	C22H16N0O3S0	22	16	0	3	0
331.144	15500414	C21H16N2O2S0	21	16	2	2	0
331.148	8853633	C26H16N0O0S0	26	16	0	0	0
331.152	15709316	C23H20N0O0S1	23	20	0	0	1
331.169	28155026	C23H20N0O2S0	23	20	0	2	0
331.173	3936405	C20H24N0O2S1	20	24	0	2	1
331.18	9060507	C22H20N2O1S0	22	20	2	1	0
331.206	13651119	C24H24N0O1S0	24	24	0	1	0
331.242	15424716	C25H28N0O0S0	25	28	0	0	0
332.11	8008590	C21H15N1O1S1	21	15	1	1	1
332.128	40554397	C21H15N1O3S0	21	15	1	3	0
332.164	45182907	C22H19N1O2S0	22	19	1	2	0
332.201	27455450	C23H23N1O1S0	23	23	1	1	0
332.222	8766443	C20H27N1O3S0	20	27	1	3	0
332.237	8910840	C24H27N1O0S0	24	27	1	0	0
332.258	4881418	C21H31N1O2S0	21	31	1	2	0
333.091	4718797	C24H10N0O2S0	24	10	0	2	0
333.094	8155856	C21H14N0O2S1	21	14	0	2	1
333.112	32584416	C21H14N0O4S0	21	14	0	4	0
333.123	14072553	C20H14N2O3S0	20	14	2	3	0
333.127	11021037	C25H14N0O1S0	25	14	0	1	0
333.149	36926207	C22H18N0O3S0	22	18	0	3	0
333.16	14211849	C21H18N2O2S0	21	18	2	2	0
333.164	11967244	C26H18N0O0S0	26	18	0	0	0
333.167	14310159	C23H22N0O0S1	23	22	0	0	1
333.185	18252575	C23H22N0O2S0	23	22	0	2	0
333.196	5759272	C22H22N2O1S0	22	22	2	1	0
333.221	7095102	C24H26N0O1S0	24	26	0	1	0
333.258	12223326	C25H30N0O0S0	25	30	0	0	0
334.126	7580254	C21H17N1O1S1	21	17	1	1	1
334.144	53483118	C21H17N1O3S0	21	17	1	3	0
334.159	4562556	C25H17N1O0S0	25	17	1	0	0
334.18	44635791	C22H21N1O2S0	22	21	1	2	0
334.217	28915375	C23H25N1O1S0	23	25	1	1	0
334.238	4335298	C20H29N1O3S0	20	29	1	3	0
334.253	6256336	C24H29N1O0S0	24	29	1	0	0
334.311	4722436	C22H37N1O1S0	22	37	1	1	0
335.089	4307406	C24H12N0O0S1	24	12	0	0	1
335.107	11119070	C24H12N0O2S0	24	12	0	2	0
335.11	6084066	C21H16N0O2S1	21	16	0	2	1
335.128	29252082	C21H16N0O4S0	21	16	0	4	0
335.139	15968764	C20H16N2O3S0	20	16	2	3	0
335.143	14582272	C25H16N0O1S0	25	16	0	1	0
335.147	10805764	C22H20N0O1S1	22	20	0	1	1
335.164	29231636	C22H20N0O3S0	22	20	0	3	0
335.175	10322462	C21H20N2O2S0	21	20	2	2	0
335.179	18455074	C26H20N0O0S0	26	20	0	0	0
335.201	10342966	C23H24N0O2S0	23	24	0	2	0
335.212	4332096	C22H24N2O1S0	22	24	2	1	0
335.237	4602967	C24H28N0O1S0	24	28	0	1	0
335.248	4642402	C23H28N2O0S0	23	28	2	0	0
335.273	5846138	C25H32N0O0S0	25	32	0	0	0
336.138	5894572	C24H15N1O1S0	24	15	1	1	0
336.142	9162160	C21H19N1O1S1	21	19	1	1	1
336.159	39230913	C21H19N1O3S0	21	19	1	3	0
336.175	6061519	C25H19N1O0S0	25	19	1	0	0
336.196	42958308	C22H23N1O2S0	22	23	1	2	0
336.232	22650375	C23H27N1O1S0	23	27	1	1	0
336.269	4524585	C24H31N1O0S0	24	31	1	0	0
337.086	7655749	C23H10N0O3S0	23	10	0	3	0
337.122	15024489	C24H14N0O2S0	24	14	0	2	0
337.143	22745470	C21H18N0O4S0	21	18	0	4	0
337.155	15411593	C20H18N2O3S0	20	18	2	3	0
337.159	20160909	C25H18N0O1S0	25	18	0	1	0
337.18	13902241	C22H22N0O3S0	22	22	0	3	0
337.191	7365036	C21H22N2O2S0	21	22	2	2	0
337.195	14121392	C26H22N0O0S0	26	22	0	0	0
337.216	5083589	C23H26N0O2S0	23	26	0	2	0
337.227	5860816	C22H26N2O1S0	22	26	2	1	0
338.118	8291657	C23H13N1O2S0	23	13	1	2	0
338.154	11902318	C24H17N1O1S0	24	17	1	1	0
338.157	5458289	C21H21N1O1S1	21	21	1	1	1
338.175	37504387	C21H21N1O3S0	21	21	1	3	0
338.19	6857106	C25H21N1O0S0	25	21	1	0	0
338.211	39749032	C22H25N1O2S0	22	25	1	2	0
338.248	20657613	C23H29N1O1S0	23	29	1	1	0
339.065	5959951	C22H8N0O4S0	22	8	0	4	0
339.078	21502236	C21H8N2O3S0	21	8	2	3	0
339.102	18028853	C23H12N0O3S0	23	12	0	3	0
339.12	11444552	C24H16N0O0S1	24	16	0	0	1
339.138	24934746	C24H16N0O2S0	24	16	0	2	0
339.149	5530982	C23H16N2O1S0	23	16	2	1	0
339.159	14643568	C21H20N0O4S0	21	20	0	4	0
339.17	8839548	C20H20N2O3S0	20	20	2	3	0
339.174	18184576	C25H20N0O1S0	25	20	0	1	0
339.195	10725781	C22H24N0O3S0	22	24	0	3	0
339.207	8968609	C21H24N2O2S0	21	24	2	2	0
339.211	13105573	C26H24N0O0S0	26	24	0	0	0
339.243	6705607	C22H28N2O1S0	22	28	2	1	0
340.097	8375616	C22H11N1O3S0	22	11	1	3	0
340.133	16862567	C23H15N1O2S0	23	15	1	2	0
340.17	15449485	C24H19N1O1S0	24	19	1	1	0
340.173	6645136	C21H23N1O1S1	21	23	1	1	1
340.191	32427427	C21H23N1O3S0	21	23	1	3	0
340.206	7472563	C25H23N1O0S0	25	23	1	0	0
340.227	32427465	C22H27N1O2S0	22	27	1	2	0
340.264	11720176	C23H31N1O1S0	23	31	1	1	0
341.081	11223379	C22H10N0O4S0	22	10	0	4	0
341.117	25420154	C23H14N0O3S0	23	14	0	3	0
341.128	5505414	C22H14N2O2S0	22	14	2	2	0
341.136	14762381	C24H18N0O0S1	24	18	0	0	1
341.154	28967328	C24H18N0O2S0	24	18	0	2	0
341.175	9925047	C21H22N0O4S0	21	22	0	4	0
341.19	13730247	C25H22N0O1S0	25	22	0	1	0
341.211	4700638	C22H26N0O3S0	22	26	0	3	0
341.222	4574698	C21H26N2O2S0	21	26	2	2	0
341.226	13134318	C26H26N0O0S0	26	26	0	0	0
342.112	21697961	C22H13N1O3S0	22	13	1	3	0
342.149	25667024	C23H17N1O2S0	23	17	1	2	0
342.185	17503736	C24H21N1O1S0	24	21	1	1	0
342.189	4217339	C21H25N1O1S1	21	25	1	1	1
342.206	23107087	C21H25N1O3S0	21	25	1	3	0
342.222	9627167	C25H25N1O0S0	25	25	1	0	0
342.243	23873078	C22H29N1O2S0	22	29	1	2	0
342.279	5541469	C23H33N1O1S0	23	33	1	1	0
343.079	4427206	C22H12N0O2S1	22	12	0	2	1
343.096	22497754	C22H12N0O4S0	22	12	0	4	0
343.108	6676966	C21H12N2O3S0	21	12	2	3	0
343.115	9621998	C23H16N0O1S1	23	16	0	1	1
343.133	33184258	C23H16N0O3S0	23	16	0	3	0
343.144	9746958	C22H16N2O2S0	22	16	2	2	0
343.151	14772758	C24H20N0O0S1	24	20	0	0	1
343.169	25258538	C24H20N0O2S0	24	20	0	2	0
343.18	8092214	C23H20N2O1S0	23	20	2	1	0
343.19	4318785	C21H24N0O4S0	21	24	0	4	0
343.206	12929618	C25H24N0O1S0	25	24	0	1	0
343.238	5624437	C21H28N2O2S0	21	28	2	2	0
343.242	21650041	C26H28N0O0S0	26	28	0	0	0
344.11	4455991	C22H15N1O1S1	22	15	1	1	1
344.128	30023243	C22H15N1O3S0	22	15	1	3	0
344.164	36306548	C23H19N1O2S0	23	19	1	2	0
344.201	20594332	C24H23N1O1S0	24	23	1	1	0
344.222	16615091	C21H27N1O3S0	21	27	1	3	0
344.237	7780036	C25H27N1O0S0	25	27	1	0	0
344.258	11665116	C22H31N1O2S0	22	31	1	2	0
345.094	4759166	C22H14N0O2S1	22	14	0	2	1
345.112	24224402	C22H14N0O4S0	22	14	0	4	0
345.123	10310303	C21H14N2O3S0	21	14	2	3	0
345.149	31183547	C23H18N0O3S0	23	18	0	3	0
345.16	9796295	C22H18N2O2S0	22	18	2	2	0
345.164	7621324	C27H18N0O0S0	27	18	0	0	0
345.167	10932944	C24H22N0O0S1	24	22	0	0	1
345.185	17404643	C24H22N0O2S0	24	22	0	2	0
345.196	7332592	C23H22N2O1S0	23	22	2	1	0
345.221	5345036	C25H26N0O1S0	25	26	0	1	0
345.258	12989237	C26H30N0O0S0	26	30	0	0	0
346.144	35432214	C22H17N1O3S0	22	17	1	3	0
346.18	35178303	C23H21N1O2S0	23	21	1	2	0
346.217	22669160	C24H25N1O1S0	24	25	1	1	0
346.238	7847807	C21H29N1O3S0	21	29	1	3	0
346.253	5172112	C25H29N1O0S0	25	29	1	0	0
346.274	4331944	C22H33N1O2S0	22	33	1	2	0
347.107	4092754	C25H12N0O2S0	25	12	0	2	0
347.11	7339862	C22H16N0O2S1	22	16	0	2	1
347.128	26594154	C22H16N0O4S0	22	16	0	4	0
347.139	14654326	C21H16N2O3S0	21	16	2	3	0
347.143	7197563	C26H16N0O1S0	26	16	0	1	0
347.164	24693651	C23H20N0O3S0	23	20	0	3	0
347.175	10978207	C22H20N2O2S0	22	20	2	2	0
347.179	7723940	C27H20N0O0S0	27	20	0	0	0
347.201	14689212	C24H24N0O2S0	24	24	0	2	0
347.212	6167496	C23H24N2O1S0	23	24	2	1	0
347.237	7317477	C25H28N0O1S0	25	28	0	1	0
347.273	10337294	C26H32N0O0S0	26	32	0	0	0
348.159	41684982	C22H19N1O3S0	22	19	1	3	0
348.178	4083723	C23H23N1O0S1	23	23	1	0	1
348.196	38875167	C23H23N1O2S0	23	23	1	2	0
348.232	20054089	C24H27N1O1S0	24	27	1	1	0
348.269	5948530	C25H31N1O0S0	25	31	1	0	0
349.105	4318754	C25H14N0O0S1	25	14	0	0	1
349.122	8846390	C25H14N0O2S0	25	14	0	2	0
349.143	21152846	C22H18N0O4S0	22	18	0	4	0
349.155	12592219	C21H18N2O3S0	21	18	2	3	0
349.159	12155999	C26H18N0O1S0	26	18	0	1	0
349.18	17425527	C23H22N0O3S0	23	22	0	3	0
349.191	4949124	C22H22N2O2S0	22	22	2	2	0
349.195	8074377	C27H22N0O0S0	27	22	0	0	0
349.216	7821472	C24H26N0O2S0	24	26	0	2	0
349.227	5391533	C23H26N2O1S0	23	26	2	1	0
349.236	5901494	C21H30N0O4S0	21	30	0	4	0
349.289	4967667	C26H34N0O0S0	26	34	0	0	0
350.118	6425753	C24H13N1O2S0	24	13	1	2	0
350.154	8869059	C25H17N1O1S0	25	17	1	1	0
350.157	5809351	C22H21N1O1S1	22	21	1	1	1
350.175	36395226	C22H21N1O3S0	22	21	1	3	0
350.19	4449516	C26H21N1O0S0	26	21	1	0	0
350.211	38467843	C23H25N1O2S0	23	25	1	2	0
350.248	12773676	C24H29N1O1S0	24	29	1	1	0
351.101	8637677	C24H12N0O3S0	24	12	0	3	0
351.12	4696322	C25H16N0O0S1	25	16	0	0	1
351.138	14597398	C25H16N0O2S0	25	16	0	2	0
351.159	15437102	C22H20N0O4S0	22	20	0	4	0
351.17	10683706	C21H20N2O3S0	21	20	2	3	0
351.174	11541823	C26H20N0O1S0	26	20	0	1	0
351.195	14333270	C23H24N0O3S0	23	24	0	3	0
351.207	7839075	C22H24N2O2S0	22	24	2	2	0
351.211	9555303	C27H24N0O0S0	27	24	0	0	0
351.232	5097855	C24H28N0O2S0	24	28	0	2	0
351.243	7966092	C23H28N2O1S0	23	28	2	1	0
352.133	8718704	C24H15N1O2S0	24	15	1	2	0
352.17	9591193	C25H19N1O1S0	25	19	1	1	0
352.173	4163996	C22H23N1O1S1	22	23	1	1	1
352.191	31154608	C22H23N1O3S0	22	23	1	3	0
352.206	5387713	C26H23N1O0S0	26	23	1	0	0
352.227	35414489	C23H27N1O2S0	23	27	1	2	0
352.263	10398209	C24H31N1O1S0	24	31	1	1	0
353.081	6627726	C23H10N0O4S0	23	10	0	4	0
353.117	14192054	C24H14N0O3S0	24	14	0	3	0
353.154	15951326	C25H18N0O2S0	25	18	0	2	0
353.175	6352374	C22H22N0O4S0	22	22	0	4	0
353.186	4674050	C21H22N2O3S0	21	22	2	3	0
353.19	11126278	C26H22N0O1S0	26	22	0	1	0
353.211	5164574	C23H26N0O3S0	23	26	0	3	0
353.222	7116330	C22H26N2O2S0	22	26	2	2	0
353.226	10954287	C27H26N0O0S0	27	26	0	0	0
354.112	11633151	C23H13N1O3S0	23	13	1	3	0
354.149	14101030	C24H17N1O2S0	24	17	1	2	0
354.185	12264014	C25H21N1O1S0	25	21	1	1	0
354.206	33016421	C22H25N1O3S0	22	25	1	3	0
354.222	5974646	C26H25N1O0S0	26	25	1	0	0
354.243	31984269	C23H29N1O2S0	23	29	1	2	0
354.279	7797429	C24H33N1O1S0	24	33	1	1	0
355.079	4680219	C23H12N0O2S1	23	12	0	2	1
355.096	12346927	C23H12N0O4S0	23	12	0	4	0
355.108	4392507	C22H12N2O3S0	22	12	2	3	0
355.115	4574787	C24H16N0O1S1	24	16	0	1	1
355.133	22064726	C24H16N0O3S0	24	16	0	3	0
355.144	6298210	C23H16N2O2S0	23	16	2	2	0
355.151	7503466	C25H20N0O0S1	25	20	0	0	1
355.169	20012670	C25H20N0O2S0	25	20	0	2	0
355.191	4880021	C22H24N0O4S0	22	24	0	4	0
355.206	8756901	C26H24N0O1S0	26	24	0	1	0
355.242	13201100	C27H28N0O0S0	27	28	0	0	0
356.128	16994948	C23H15N1O3S0	23	15	1	3	0
356.164	18387627	C24H19N1O2S0	24	19	1	2	0
356.201	10398417	C25H23N1O1S0	25	23	1	1	0
356.222	24785640	C22H27N1O3S0	22	27	1	3	0
356.237	6328056	C26H27N1O0S0	26	27	1	0	0
356.258	17756943	C23H31N1O2S0	23	31	1	2	0
357.112	18806421	C23H14N0O4S0	23	14	0	4	0
357.123	8044193	C22H14N2O3S0	22	14	2	3	0
357.149	23156411	C24H18N0O3S0	24	18	0	3	0
357.16	7931591	C23H18N2O2S0	23	18	2	2	0
357.167	11071183	C25H22N0O0S1	25	22	0	0	1
357.185	16090849	C25H22N0O2S0	25	22	0	2	0
357.196	5855981	C24H22N2O1S0	24	22	2	1	0
357.221	6531848	C26H26N0O1S0	26	26	0	1	0
357.258	29189934	C27H30N0O0S0	27	30	0	0	0
358.144	25123525	C23H17N1O3S0	23	17	1	3	0
358.163	4108505	C24H21N1O0S1	24	21	1	0	1
358.18	26893035	C24H21N1O2S0	24	21	1	2	0
358.217	13880080	C25H25N1O1S0	25	25	1	1	0
358.238	16098086	C22H29N1O3S0	22	29	1	3	0
358.253	7838517	C26H29N1O0S0	26	29	1	0	0
358.274	10283851	C23H33N1O2S0	23	33	1	2	0
359.128	19127983	C23H16N0O4S0	23	16	0	4	0
359.139	8500922	C22H16N2O3S0	22	16	2	3	0
359.164	16510675	C24H20N0O3S0	24	20	0	3	0
359.175	9631454	C23H20N2O2S0	23	20	2	2	0
359.183	8029926	C25H24N0O0S1	25	24	0	0	1
359.201	11220728	C25H24N0O2S0	25	24	0	2	0
359.237	5811996	C26H28N0O1S0	26	28	0	1	0
359.273	10944321	C27H32N0O0S0	27	32	0	0	0
360.159	30954160	C23H19N1O3S0	23	19	1	3	0
360.179	4460227	C24H23N1O0S1	24	23	1	0	1
360.196	30143188	C24H23N1O2S0	24	23	1	2	0
360.232	14611192	C25H27N1O1S0	25	27	1	1	0
360.253	11127564	C22H31N1O3S0	22	31	1	3	0
360.269	5130011	C26H31N1O0S0	26	31	1	0	0
361.122	4662869	C26H14N0O2S0	26	14	0	2	0
361.143	18028137	C23H18N0O4S0	23	18	0	4	0
361.155	10679924	C22H18N2O3S0	22	18	2	3	0
361.159	7753336	C27H18N0O1S0	27	18	0	1	0
361.18	14278284	C24H22N0O3S0	24	22	0	3	0
361.191	7487126	C23H22N2O2S0	23	22	2	2	0
361.216	7913134	C25H26N0O2S0	25	26	0	2	0
361.227	5565113	C24H26N2O1S0	24	26	2	1	0
361.253	4080337	C26H30N0O1S0	26	30	0	1	0
361.289	7005940	C27H34N0O0S0	27	34	0	0	0
362.175	33540659	C23H21N1O3S0	23	21	1	3	0
362.211	29174357	C24H25N1O2S0	24	25	1	2	0
362.248	12145270	C25H29N1O1S0	25	29	1	1	0
362.269	4743818	C22H33N1O3S0	22	33	1	3	0
363.138	8043936	C26H16N0O2S0	26	16	0	2	0
363.159	14740915	C23H20N0O4S0	23	20	0	4	0
363.17	7663037	C22H20N2O3S0	22	20	2	3	0
363.174	5671360	C27H20N0O1S0	27	20	0	1	0
363.196	9356755	C24H24N0O3S0	24	24	0	3	0
363.207	6604254	C23H24N2O2S0	23	24	2	2	0
363.211	6624737	C28H24N0O0S0	28	24	0	0	0
363.243	4873726	C24H28N2O1S0	24	28	2	1	0
364.133	4939022	C25H15N1O2S0	25	15	1	2	0
364.17	6593837	C26H19N1O1S0	26	19	1	1	0
364.191	34910527	C23H23N1O3S0	23	23	1	3	0
364.206	5372237	C27H23N1O0S0	27	23	1	0	0
364.227	36098399	C24H27N1O2S0	24	27	1	2	0
364.263	9208190	C25H31N1O1S0	25	31	1	1	0
365.117	6347862	C25H14N0O3S0	25	14	0	3	0
365.136	5183589	C26H18N0O0S1	26	18	0	0	1
365.154	8366196	C26H18N0O2S0	26	18	0	2	0
365.175	8385670	C23H22N0O4S0	23	22	0	4	0
365.186	8051855	C22H22N2O3S0	22	22	2	3	0
365.19	7294098	C27H22N0O1S0	27	22	0	1	0
365.211	6046884	C24H26N0O3S0	24	26	0	3	0
365.222	6876334	C23H26N2O2S0	23	26	2	2	0
365.226	6138033	C28H26N0O0S0	28	26	0	0	0
366.112	4678540	C24H13N1O3S0	24	13	1	3	0
366.149	7905193	C25H17N1O2S0	25	17	1	2	0
366.185	6041543	C26H21N1O1S0	26	21	1	1	0
366.206	35387352	C23H25N1O3S0	23	25	1	3	0
366.222	4619748	C27H25N1O0S0	27	25	1	0	0
366.243	26118134	C24H29N1O2S0	24	29	1	2	0
366.279	5708819	C25H33N1O1S0	25	33	1	1	0
367.096	6519455	C24H12N0O4S0	24	12	0	4	0
367.109	15993513	C23H12N2O3S0	23	12	2	3	0
367.133	11764411	C25H16N0O3S0	25	16	0	3	0
367.144	4096708	C24H16N2O2S0	24	16	2	2	0
367.151	7143114	C26H20N0O0S1	26	20	0	0	1
367.169	13722328	C26H20N0O2S0	26	20	0	2	0
367.19	7406312	C23H24N0O4S0	23	24	0	4	0
367.202	8694513	C22H24N2O3S0	22	24	2	3	0
367.206	6134517	C27H24N0O1S0	27	24	0	1	0
367.227	6757125	C24H28N0O3S0	24	28	0	3	0
367.238	6023950	C23H28N2O2S0	23	28	2	2	0
367.242	7054097	C28H28N0O0S0	28	28	0	0	0
368.128	9987517	C24H15N1O3S0	24	15	1	3	0
368.164	13336024	C25H19N1O2S0	25	19	1	2	0
368.201	7010804	C26H23N1O1S0	26	23	1	1	0
368.222	30383620	C23H27N1O3S0	23	27	1	3	0
368.237	6393360	C27H27N1O0S0	27	27	1	0	0
368.258	22883872	C24H31N1O2S0	24	31	1	2	0
369.112	12517533	C24H14N0O4S0	24	14	0	4	0
369.123	4526245	C23H14N2O3S0	23	14	2	3	0
369.13	4061354	C25H18N0O1S1	25	18	0	1	1
369.149	14670008	C25H18N0O3S0	25	18	0	3	0
369.16	5560512	C24H18N2O2S0	24	18	2	2	0
369.167	10080453	C26H22N0O0S1	26	22	0	0	1
369.185	10545362	C26H22N0O2S0	26	22	0	2	0
369.206	5123298	C23H26N0O4S0	23	26	0	4	0
369.221	6412525	C27H26N0O1S0	27	26	0	1	0
369.254	5197061	C23H30N2O2S0	23	30	2	2	0
369.258	9216264	C28H30N0O0S0	28	30	0	0	0
370.144	16896904	C24H17N1O3S0	24	17	1	3	0
370.18	15184801	C25H21N1O2S0	25	21	1	2	0
[truncated: 1,002 more rows]

## Sheet: SRNOM-(-)ESI
m/z	intensity	Formula	C	H	N	O	S
229.035	2444807	C9H10N0O7S0	9	10	0	7	0
229.072	2453821	C10H14N0O6S0	10	14	0	6	0
227.02	2548443	C9H8N0O7S0	9	8	0	7	0
251.067	2590395	C11H12N2O5S0	11	12	2	5	0
250.072	2653085	C12H13N1O5S0	12	13	1	5	0
357.046	393844077	C14H14N0O11S0	14	14	0	11	0
369.046	405625191	C15H14N0O11S0	15	14	0	11	0
243.103	2750871	C15H16N0O3S0	15	16	0	3	0
269.041	2772053	C10H10N2O7S0	10	10	2	7	0
268.119	2773403	C13H19N1O5S0	13	19	1	5	0
281.034	2776251	C9H14N0O8S1	9	14	0	8	1
272.971	2777519	C9H6N0O8S1	9	6	0	8	1
234.988	2783436	C10H4N0O7S0	10	4	0	7	0
258.062	2802577	C10H13N1O7S0	10	13	1	7	0
281.041	2817905	C11H10N2O7S0	11	10	2	7	0
219.03	2831915	C11H8N0O5S0	11	8	0	5	0
291.099	2836086	C14H16N2O5S0	14	16	2	5	0
279.072	2837263	C10H16N0O9S0	10	16	0	9	0
277.093	2869494	C11H18N0O8S0	11	18	0	8	0
217.051	2877785	C12H10N0O4S0	12	10	0	4	0
290.052	2879012	C10H13N1O9S0	10	13	1	9	0
275.06	2889439	C11H16N0O6S1	11	16	0	6	1
258.041	2891171	C13H9N1O5S0	13	9	1	5	0
296.989	2906791	C11H6N0O10S0	11	6	0	10	0
241.217	2910910	C15H30N0O2S0	15	30	0	2	0
288.036	2915203	C10H11N1O9S0	10	11	1	9	0
292.061	2922490	C17H11N1O4S0	17	11	1	4	0
289.002	2928975	C10H10N0O8S1	10	10	0	8	1
293.07	2943355	C11H18N0O7S1	11	18	0	7	1
303.099	2956833	C15H16N2O5S0	15	16	2	5	0
288.073	2978809	C11H15N1O8S0	11	15	1	8	0
304.067	2980739	C11H15N1O9S0	11	15	1	9	0
299.052	3003563	C11H12N2O8S0	11	12	2	8	0
229.051	3022395	C13H10N0O4S0	13	10	0	4	0
249.056	3028250	C16H10N0O3S0	16	10	0	3	0
313.003	3031540	C12H10N0O8S1	12	10	0	8	1
238.072	3031798	C11H13N1O5S0	11	13	1	5	0
281.009	3056090	C15H6N0O6S0	15	6	0	6	0
320.005	3057567	C13H7N1O9S0	13	7	1	9	0
274.057	3063302	C10H13N1O8S0	10	13	1	8	0
221.009	3068615	C10H6N0O6S0	10	6	0	6	0
318.083	3071389	C12H17N1O9S0	12	17	1	9	0
260.02	3075942	C12H7N1O6S0	12	7	1	6	0
312	3078684	C11H7N1O10S0	11	7	1	10	0
308.056	3085951	C17H11N1O5S0	17	11	1	5	0
286.021	3088064	C10H9N1O9S0	10	9	1	9	0
277.083	3097069	C13H14N2O5S0	13	14	2	5	0
253.087	3098673	C16H14N0O3S0	16	14	0	3	0
293.176	3103544	C17H26N0O4S0	17	26	0	4	0
323.071	3112096	C22H12N0O3S0	22	12	0	3	0
323.035	3114703	C21H8N0O4S0	21	8	0	4	0
248.056	3126150	C12H11N1O5S0	12	11	1	5	0
309.036	3130637	C12H10N2O8S0	12	10	2	8	0
304.01	3139219	C13H7N1O8S0	13	7	1	8	0
305.114	3146924	C15H18N2O5S0	15	18	2	5	0
298.072	3148894	C16H13N1O5S0	16	13	1	5	0
251.035	3158395	C15H8N0O4S0	15	8	0	4	0
289.075	3161688	C12H18N0O6S1	12	18	0	6	1
309.004	3192556	C16H6N0O7S0	16	6	0	7	0
323.129	3198957	C20H20N0O4S0	20	20	0	4	0
301.104	3203511	C12H18N2O7S0	12	18	2	7	0
297.15	3206396	C19H22N0O3S0	19	22	0	3	0
277.02	3234167	C9H10N0O10S0	9	10	0	10	0
263.041	3249158	C9H12N0O9S0	9	12	0	9	0
241.108	3262735	C12H18N0O5S0	12	18	0	5	0
262.072	3269721	C13H13N1O5S0	13	13	1	5	0
276.088	3272061	C14H15N1O5S0	14	15	1	5	0
327.16	3274519	C20H24N0O4S0	20	24	0	4	0
251.129	3276660	C14H20N0O4S0	14	20	0	4	0
338.03	3282303	C17H9N1O7S0	17	9	1	7	0
285.007	3283734	C11H10N0O7S1	11	10	0	7	1
341.082	3292626	C22H14N0O4S0	22	14	0	4	0
320.992	3296574	C10H10N0O10S1	10	10	0	10	1
315.062	3298131	C15H12N2O6S0	15	12	2	6	0
307.021	3299994	C12H8N2O8S0	12	8	2	8	0
321.113	3300028	C20H18N0O4S0	20	18	0	4	0
333.109	3311302	C16H18N2O6S0	16	18	2	6	0
346.13	3319303	C18H21N1O6S0	18	21	1	6	0
341.046	3327580	C21H10N0O5S0	21	10	0	5	0
306.135	3332353	C16H21N1O5S0	16	21	1	5	0
269.249	3341140	C17H34N0O2S0	17	34	0	2	0
283.094	3342673	C12H16N2O6S0	12	16	2	6	0
237.113	3342949	C13H18N0O4S0	13	18	0	4	0
323.023	3349471	C14H12N0O7S1	14	12	0	7	1
283.028	3352870	C12H12N0O6S1	12	12	0	6	1
354.998	3352871	C10H12N0O12S1	10	12	0	12	1
285.073	3359007	C11H14N2O7S0	11	14	2	7	0
329.063	3365791	C12H14N2O9S0	12	14	2	9	0
320.057	3378145	C18H11N1O5S0	18	11	1	5	0
259.01	3378147	C9H8N0O9S0	9	8	0	9	0
357.013	3381948	C10H14N0O12S1	10	14	0	12	1
304.061	3396222	C18H11N1O4S0	18	11	1	4	0
255.103	3400704	C16H16N0O3S0	16	16	0	3	0
310.072	3422130	C17H13N1O5S0	17	13	1	5	0
284.02	3423946	C14H7N1O6S0	14	7	1	6	0
313.166	3425451	C16H26N0O6S0	16	26	0	6	0
314.015	3430194	C11H9N1O10S0	11	9	1	10	0
293.009	3430360	C16H6N0O6S0	16	6	0	6	0
277.047	3433390	C12H10N2O6S0	12	10	2	6	0
325.039	3452818	C14H14N0O7S1	14	14	0	7	1
342.098	3452867	C18H17N1O6S0	18	17	1	6	0
341.106	3455479	C16H22N0O6S1	16	22	0	6	1
343.097	3455705	C22H16N0O4S0	22	16	0	4	0
300.015	3460325	C14H7N1O7S0	14	7	1	7	0
365.082	3469031	C24H14N0O4S0	24	14	0	4	0
287.165	3482056	C18H24N0O3S0	18	24	0	3	0
347.092	3488034	C21H16N0O5S0	21	16	0	5	0
363.011	3489073	C14H8N2O10S0	14	8	2	10	0
369.077	3498130	C23H14N0O5S0	23	14	0	5	0
358.989	3505165	C12H8N0O13S0	12	8	0	13	0
288.015	3505687	C13H7N1O7S0	13	7	1	7	0
231.066	3511637	C13H12N0O4S0	13	12	0	4	0
309.083	3511931	C11H18N0O10S0	11	18	0	10	0
337.002	3514115	C14H10N0O8S1	14	10	0	8	1
297.044	3514442	C13H14N0O6S1	13	14	0	6	1
371.029	3522032	C11H16N0O12S1	11	16	0	12	1
306.041	3523787	C17H9N1O5S0	17	9	1	5	0
285.149	3525870	C18H22N0O3S0	18	22	0	3	0
294.041	3526767	C16H9N1O5S0	16	9	1	5	0
313.031	3538804	C11H10N2O9S0	11	10	2	9	0
341.018	3551859	C10H14N0O11S1	10	14	0	11	1
320.114	3565931	C16H19N1O6S0	16	19	1	6	0
340.082	3573050	C18H15N1O6S0	18	15	1	6	0
256.046	3576836	C10H11N1O7S0	10	11	1	7	0
373.202	3578678	C22H30N0O5S0	22	30	0	5	0
321.109	3583479	C15H18N2O6S0	15	18	2	6	0
335.125	3584000	C16H20N2O6S0	16	20	2	6	0
324.999	3584155	C16H6N0O8S0	16	6	0	8	0
365.026	3586199	C14H10N2O10S0	14	10	2	10	0
331.094	3592266	C16H16N2O6S0	16	16	2	6	0
301.087	3592267	C20H14N0O3S0	20	14	0	3	0
280.061	3596580	C16H11N1O4S0	16	11	1	4	0
316.997	3596706	C11H10N0O9S1	11	10	0	9	1
251.071	3607077	C16H12N0O3S0	16	12	0	3	0
355.025	3613903	C21H8N0O6S0	21	8	0	6	0
313.104	3624518	C13H18N2O7S0	13	18	2	7	0
264.088	3632436	C13H15N1O5S0	13	15	1	5	0
331.098	3648784	C21H16N0O4S0	21	16	0	4	0
377.103	3662553	C22H18N0O6S0	22	18	0	6	0
223.025	3664217	C10H8N0O6S0	10	8	0	6	0
383.056	3670123	C23H12N0O6S0	23	12	0	6	0
243.03	3673707	C13H8N0O5S0	13	8	0	5	0
373.052	3675403	C13H14N2O11S0	13	14	2	11	0
303.03	3676521	C18H8N0O5S0	18	8	0	5	0
284.057	3687969	C15H11N1O5S0	15	11	1	5	0
296.114	3689735	C14H19N1O6S0	14	19	1	6	0
267.103	3692459	C17H16N0O3S0	17	16	0	3	0
365.139	3692666	C22H22N0O5S0	22	22	0	5	0
384.109	3693829	C20H19N1O7S0	20	19	1	7	0
381.113	3697927	C25H18N0O4S0	25	18	0	4	0
347.016	3698640	C14H8N2O9S0	14	8	2	9	0
329.099	3703059	C13H18N2O8S0	13	18	2	8	0
397.072	3707762	C24H14N0O6S0	24	14	0	6	0
362.073	3708255	C13H17N1O11S0	13	17	1	11	0
293.042	3713099	C12H10N2O7S0	12	10	2	7	0
311.023	3713180	C13H12N0O7S1	13	12	0	7	1
387.994	3714056	C16H7N1O11S0	16	7	1	11	0
253.051	3717405	C15H10N0O4S0	15	10	0	4	0
343.176	3717902	C17H28N0O7S0	17	28	0	7	0
281.118	3726856	C18H18N0O3S0	18	18	0	3	0
345.041	3727983	C20H10N0O6S0	20	10	0	6	0
262.036	3730069	C12H9N1O6S0	12	9	1	6	0
261.025	3730498	C9H10N0O9S0	9	10	0	9	0
375.12	3731970	C18H20N2O7S0	18	20	2	7	0
231.03	3737733	C12H8N0O5S0	12	8	0	5	0
302.088	3739264	C12H17N1O8S0	12	17	1	8	0
250.036	3748947	C11H9N1O6S0	11	9	1	6	0
273.15	3749884	C17H22N0O3S0	17	22	0	3	0
263.035	3780507	C16H8N0O4S0	16	8	0	4	0
373.032	3783942	C16H10N2O9S0	16	10	2	9	0
366.01	3785570	C14H9N1O11S0	14	9	1	11	0
410.146	3785837	C19H25N1O9S0	19	25	1	9	0
723.068	3786400	C29H24N0O22S0	29	24	0	22	0
349.202	3792549	C20H30N0O5S0	20	30	0	5	0
413.12	3792907	C17H22N2O10S0	17	22	2	10	0
396.987	3793536	C15H10N0O11S1	15	10	0	11	1
259.134	3794890	C16H20N0O3S0	16	20	0	3	0
755.146	3795128	C35H32N0O19S0	35	32	0	19	0
261.056	3796302	C17H10N0O3S0	17	10	0	3	0
390.068	3798375	C14H17N1O12S0	14	17	1	12	0
297.036	3802885	C11H10N2O8S0	11	10	2	8	0
401.031	3809824	C22H10N0O8S0	22	10	0	8	0
331.025	3813990	C19H8N0O6S0	19	8	0	6	0
364.997	3815021	C15H10N0O9S1	15	10	0	9	1
315.091	3815540	C14H20N0O6S1	14	20	0	6	1
326.067	3824159	C17H13N1O6S0	17	13	1	6	0
235.098	3828971	C13H16N0O4S0	13	16	0	4	0
247.046	3829858	C9H12N0O8S0	9	12	0	8	0
257.118	3836319	C16H18N0O3S0	16	18	0	3	0
237.004	3838832	C10H6N0O7S0	10	6	0	7	0
380.992	3841569	C15H10N0O10S1	15	10	0	10	1
339.003	3845739	C10H12N0O11S1	10	12	0	11	1
411.111	3846178	C19H24N0O8S1	19	24	0	8	1
279.103	3849927	C18H16N0O3S0	18	16	0	3	0
289.087	3850847	C19H14N0O3S0	19	14	0	3	0
397.031	3852091	C18H10N2O9S0	18	10	2	9	0
683.184	3855167	C30H36N0O18S0	30	36	0	18	0
393.104	3874754	C15H22N0O12S0	15	22	0	12	0
412.982	3879754	C15H10N0O12S1	15	10	0	12	1
337.032	3881839	C13H10N2O9S0	13	10	2	9	0
277.057	3886231	C10H14N0O9S0	10	14	0	9	0
413.197	3889142	C24H30N0O6S0	24	30	0	6	0
385.132	3889777	C18H26N0O7S1	18	26	0	7	1
293.118	3893495	C19H18N0O3S0	19	18	0	3	0
381.13	3894366	C17H22N2O8S0	17	22	2	8	0
429.094	3895065	C20H18N2O9S0	20	18	2	9	0
423.042	3895115	C14H16N0O15S0	14	16	0	15	0
618.074	3905020	C26H21N1O17S0	26	21	1	17	0
647.235	3905596	C32H40N0O14S0	32	40	0	14	0
271.134	3906578	C17H20N0O3S0	17	20	0	3	0
407.146	3927905	C19H24N2O8S0	19	24	2	8	0
309.056	3932576	C21H10N0O3S0	21	10	0	3	0
291.103	3932632	C19H16N0O3S0	19	16	0	3	0
337.041	3932733	C11H14N0O12S0	11	14	0	12	0
328.994	3932924	C15H6N0O9S0	15	6	0	9	0
301.002	3933708	C11H10N0O8S1	11	10	0	8	1
396.073	3937852	C20H15N1O8S0	20	15	1	8	0
605.136	3938735	C24H30N0O18S0	24	30	0	18	0
575.047	3941042	C28H16N0O14S0	28	16	0	14	0
311.071	3943567	C21H12N0O3S0	21	12	0	3	0
422.987	3947514	C13H12N0O14S1	13	12	0	14	1
651.1	3952240	C31H24N0O16S0	31	24	0	16	0
641.223	3957414	C33H38N0O13S0	33	38	0	13	0
425.054	3961614	C18H18N0O10S1	18	18	0	10	1
319.021	3965431	C13H8N2O8S0	13	8	2	8	0
721.069	3969212	C33H22N0O19S0	33	22	0	19	0
403.213	3969299	C23H32N0O6S0	23	32	0	6	0
659.11	3970565	C26H28N0O20S0	26	28	0	20	0
325.024	3970941	C10H14N0O10S1	10	14	0	10	1
283.134	3971756	C18H20N0O3S0	18	20	0	3	0
563.01	3975475	C26H12N0O15S0	26	12	0	15	0
412.104	3975683	C21H19N1O8S0	21	19	1	8	0
603.048	3977046	C22H20N0O20S0	22	20	0	20	0
612.063	3985483	C27H19N1O16S0	27	19	1	16	0
630.074	3986051	C27H21N1O17S0	27	21	1	17	0
570.11	3989906	C23H25N1O16S0	23	25	1	16	0
353.082	3995676	C23H14N0O4S0	23	14	0	4	0
607.11	3995775	C30H24N0O14S0	30	24	0	14	0
291.072	3996167	C11H16N0O9S0	11	16	0	9	0
695.053	4000190	C31H20N0O19S0	31	20	0	19	0
309.113	4001114	C19H18N0O4S0	19	18	0	4	0
606.074	4002901	C25H21N1O17S0	25	21	1	17	0
225.077	4004495	C11H14N0O5S0	11	14	0	5	0
410.088	4004637	C21H17N1O8S0	21	17	1	8	0
321.083	4007253	C12H18N0O10S0	12	18	0	10	0
409.166	4007273	C24H26N0O6S0	24	26	0	6	0
370.093	4016957	C19H17N1O7S0	19	17	1	7	0
265.087	4017465	C17H14N0O3S0	17	14	0	3	0
541.245	4021209	C30H38N0O9S0	30	38	0	9	0
340.994	4021710	C16H6N0O9S0	16	6	0	9	0
576.136	4023312	C26H27N1O14S0	26	27	1	14	0
331.122	4026867	C15H24N0O6S1	15	24	0	6	1
299.023	4033303	C12H12N0O7S1	12	12	0	7	1
349.038	4035666	C16H14N0O7S1	16	14	0	7	1
310.036	4040780	C16H9N1O6S0	16	9	1	6	0
615.245	4042976	C32H40N0O12S0	32	40	0	12	0
219.066	4043649	C12H12N0O4S0	12	12	0	4	0
333.037	4044571	C14H10N2O8S0	14	10	2	8	0
588.137	4046421	C27H27N1O14S0	27	27	1	14	0
582.11	4048454	C24H25N1O16S0	24	25	1	16	0
681.24	4052797	C32H42N0O16S0	32	42	0	16	0
703.116	4052904	C31H28N0O19S0	31	28	0	19	0
665.027	4059919	C26H18N0O21S0	26	18	0	21	0
299.089	4060291	C12H16N2O7S0	12	16	2	7	0
255.124	4061162	C13H20N0O5S0	13	20	0	5	0
435.003	4062901	C18H12N0O11S1	18	12	0	11	1
600.063	4062923	C26H19N1O16S0	26	19	1	16	0
313.039	4063612	C13H14N0O7S1	13	14	0	7	1
435.109	4064477	C24H20N0O8S0	24	20	0	8	0
685.178	4065079	C33H34N0O16S0	33	34	0	16	0
577.011	4065342	C23H14N0O18S0	23	14	0	18	0
669.058	4073416	C26H22N0O21S0	26	22	0	21	0
446.984	4075309	C18H8N0O14S0	18	8	0	14	0
592.058	4076999	C24H19N1O17S0	24	19	1	17	0
362.036	4089130	C12H13N1O12S0	12	13	1	12	0
394.005	4090614	C15H9N1O12S0	15	9	1	12	0
221.082	4094798	C12H14N0O4S0	12	14	0	4	0
586.047	4097638	C25H17N1O16S0	25	17	1	16	0
613.229	4100863	C32H38N0O12S0	32	38	0	12	0
629.173	4101281	C27H34N0O17S0	27	34	0	17	0
385.036	4103534	C22H10N0O7S0	22	10	0	7	0
349.108	4104473	C21H18N0O5S0	21	18	0	5	0
566.151	4105658	C25H29N1O14S0	25	29	1	14	0
713.1	4106420	C32H26N0O19S0	32	26	0	19	0
540.136	4110580	C23H27N1O14S0	23	27	1	14	0
627.048	4111557	C24H20N0O20S0	24	20	0	20	0
520.999	4115572	C24H10N0O14S0	24	10	0	14	0
275.165	4115940	C17H24N0O3S0	17	24	0	3	0
323.08	4115948	C12H20N0O8S1	12	20	0	8	1
404.135	4116079	C20H23N1O8S0	20	23	1	8	0
424.031	4116110	C20H11N1O10S0	20	11	1	10	0
395.207	4116218	C21H32N0O7S0	21	32	0	7	0
669.183	4118877	C33H34N0O15S0	33	34	0	15	0
654.111	4122153	C30H25N1O16S0	30	25	1	16	0
317.042	4128152	C14H10N2O7S0	14	10	2	7	0
637.121	4129894	C31H26N0O15S0	31	26	0	15	0
291.054	4130653	C11H16N0O7S1	11	16	0	7	1
568.131	4133731	C24H27N1O15S0	24	27	1	15	0
607.24	4135556	C30H40N0O13S0	30	40	0	13	0
425.092	4136709	C19H22N0O9S1	19	22	0	9	1
531.057	4137971	C27H16N0O12S0	27	16	0	12	0
408.13	4138656	C19H23N1O9S0	19	23	1	9	0
389.03	4138744	C21H10N0O8S0	21	10	0	8	0
325.051	4141538	C21H10N0O4S0	21	10	0	4	0
408.987	4142836	C16H10N0O11S1	16	10	0	11	1
555.224	4142876	C30H36N0O10S0	30	36	0	10	0
387.024	4144429	C11H16N0O13S1	11	16	0	13	1
417.026	4147861	C22H10N0O9S0	22	10	0	9	0
675.157	4149686	C31H32N0O17S0	31	32	0	17	0
570.053	4149765	C25H17N1O15S0	25	17	1	15	0
498.979	4155405	C21H8N0O15S0	21	8	0	15	0
496.089	4155446	C24H19N1O11S0	24	19	1	11	0
313.087	4159859	C21H14N0O3S0	21	14	0	3	0
418.992	4160414	C14H12N0O13S1	14	12	0	13	1
279.16	4161588	C16H24N0O4S0	16	24	0	4	0
388.982	4161591	C13H10N0O12S1	13	10	0	12	1
559.167	4162411	C24H32N0O15S0	24	32	0	15	0
281.249	4167236	C18H34N0O2S0	18	34	0	2	0
233.082	4171205	C13H14N0O4S0	13	14	0	4	0
655.152	4171354	C28H32N0O18S0	28	32	0	18	0
707.183	4177265	C32H36N0O18S0	32	36	0	18	0
327.066	4178195	C21H12N0O4S0	21	12	0	4	0
430.005	4180890	C18H9N1O12S0	18	9	1	12	0
530.079	4181757	C20H21N1O16S0	20	21	1	16	0
471.239	4181958	C27H36N0O7S0	27	36	0	7	0
451.136	4183210	C20H24N2O10S0	20	24	2	10	0
615.048	4185942	C23H20N0O20S0	23	20	0	20	0
434.988	4186653	C14H12N0O14S1	14	12	0	14	1
499.099	4190746	C23H20N2O11S0	23	20	2	11	0
275.035	4193671	C17H8N0O4S0	17	8	0	4	0
373.072	4197119	C22H14N0O6S0	22	14	0	6	0
467.229	4202398	C24H36N0O9S0	24	36	0	9	0
504.151	4202861	C24H27N1O11S0	24	27	1	11	0
601.011	4207866	C25H14N0O18S0	25	14	0	18	0
614.115	4208809	C28H25N1O15S0	28	25	1	15	0
368.992	4210585	C14H10N0O10S1	14	10	0	10	1
385.072	4212895	C23H14N0O6S0	23	14	0	6	0
305.041	4216332	C13H10N2O7S0	13	10	2	7	0
497.003	4224243	C19H14N0O14S1	19	14	0	14	1
272.041	4224677	C10H11N1O8S0	10	11	1	8	0
434.146	4225768	C21H25N1O9S0	21	25	1	9	0
351.015	4227623	C18H8N0O8S0	18	8	0	8	0
739.1	4228934	C30H28N0O22S0	30	28	0	22	0
383.08	4229260	C17H20N0O8S1	17	20	0	8	1
567.187	4229655	C30H32N0O11S0	30	32	0	11	0
404.084	4231978	C15H19N1O12S0	15	19	1	12	0
600.1	4232525	C27H23N1O15S0	27	23	1	15	0
548.141	4234491	C25H27N1O13S0	25	27	1	13	0
623.031	4234586	C28H16N0O17S0	28	16	0	17	0
309.109	4235542	C14H18N2O6S0	14	18	2	6	0
277.039	4236839	C10H14N0O7S1	10	14	0	7	1
526.047	4236865	C20H17N1O16S0	20	17	1	16	0
593.13	4237533	C30H26N0O13S0	30	26	0	13	0
272.078	4240238	C11H15N1O7S0	11	15	1	7	0
456.021	4240583	C20H11N1O12S0	20	11	1	12	0
391.013	4241112	C17H12N0O9S1	17	12	0	9	1
320.989	4243066	C13H6N0O10S0	13	6	0	10	0
521.142	4248023	C23H26N2O12S0	23	26	2	12	0
681.167	4249651	C30H34N0O18S0	30	34	0	18	0
402.119	4255061	C20H21N1O8S0	20	21	1	8	0
437.026	4256202	C20H10N2O10S0	20	10	2	10	0
605.093	4257453	C30H22N0O14S0	30	22	0	14	0
667.131	4257661	C32H28N0O16S0	32	28	0	16	0
233.046	4259175	C12H10N0O5S0	12	10	0	5	0
269.078	4264853	C11H14N2O6S0	11	14	2	6	0
432.13	4265607	C21H23N1O9S0	21	23	1	9	0
409.059	4266904	C18H18N0O9S1	18	18	0	9	1
681.037	4269089	C30H18N0O19S0	30	18	0	19	0
570.089	4272653	C26H21N1O14S0	26	21	1	14	0
283.155	4274618	C15H24N0O5S0	15	24	0	5	0
293.051	4277105	C10H14N0O10S0	10	14	0	10	0
552.136	4277584	C24H27N1O14S0	24	27	1	14	0
359.056	4278767	C21H12N0O6S0	21	12	0	6	0
669.146	4279639	C32H30N0O16S0	32	30	0	16	0
414.12	4281731	C21H21N1O8S0	21	21	1	8	0
499.128	4282541	C22H28N0O11S1	22	28	0	11	1
595.146	4283310	C30H28N0O13S0	30	28	0	13	0
311.129	4283341	C19H20N0O4S0	19	20	0	4	0
561.271	4283491	C30H42N0O10S0	30	42	0	10	0
480.152	4288866	C22H27N1O11S0	22	27	1	11	0
571.203	4292736	C26H36N0O14S0	26	36	0	14	0
367.061	4293386	C23H12N0O5S0	23	12	0	5	0
727.151	4297333	C34H32N0O18S0	34	32	0	18	0
269.118	4297770	C17H18N0O3S0	17	18	0	3	0
221.046	4298480	C11H10N0O5S0	11	10	0	5	0
406.005	4302929	C16H9N1O12S0	16	9	1	12	0
564.078	4303626	C27H19N1O13S0	27	19	1	13	0
351.12	4304003	C16H20N2O7S0	16	20	2	7	0
291.16	4305401	C17H24N0O4S0	17	24	0	4	0
350.067	4310441	C19H13N1O6S0	19	13	1	6	0
450.047	4311843	C22H13N1O10S0	22	13	1	10	0
440.026	4318237	C20H11N1O11S0	20	11	1	11	0
471.09	4319962	C18H20N2O13S0	18	20	2	13	0
725.084	4329115	C29H26N0O22S0	29	26	0	22	0
472.125	4332728	C23H23N1O10S0	23	23	1	10	0
365.036	4338405	C12H14N0O13S0	12	14	0	13	0
737.121	4339352	C31H30N0O21S0	31	30	0	21	0
313.075	4340005	C14H18N0O6S1	14	18	0	6	1
415.063	4341107	C15H16N2O12S0	15	16	2	12	0
535.084	4342376	C22H20N2O14S0	22	20	2	14	0
332.114	4342678	C17H19N1O6S0	17	19	1	6	0
367.049	4349112	C16H16N0O8S1	16	16	0	8	1
285.056	4356756	C19H10N0O3S0	19	10	0	3	0
389.128	4357882	C17H26N0O8S1	17	26	0	8	1
265.145	4357942	C15H22N0O4S0	15	22	0	4	0
279.062	4358216	C12H12N2O6S0	12	12	2	6	0
332.989	4362069	C14H6N0O10S0	14	6	0	10	0
326.031	4365805	C16H9N1O7S0	16	9	1	7	0
333.101	4368634	C14H22N0O7S1	14	22	0	7	1
260.056	4368880	C13H11N1O5S0	13	11	1	5	0
287.023	4369333	C11H12N0O7S1	11	12	0	7	1
469.11	4370179	C19H22N2O12S0	19	22	2	12	0
547.167	4372209	C23H32N0O15S0	23	32	0	15	0
641.151	4372635	C31H30N0O15S0	31	30	0	15	0
440.156	4373488	C20H27N1O10S0	20	27	1	10	0
608.089	4375846	C25H23N1O17S0	25	23	1	17	0
416.994	4375912	C14H10N0O15S0	14	10	0	15	0
307.067	4377542	C11H16N0O10S0	11	16	0	10	0
325.145	4378915	C20H22N0O4S0	20	22	0	4	0
328.997	4380673	C12H10N0O9S1	12	10	0	9	1
425.127	4383355	C20H26N0O8S1	20	26	0	8	1
510.067	4385307	C24H17N1O12S0	24	17	1	12	0
653.208	4386064	C30H38N0O16S0	30	38	0	16	0
225.04	4386644	C10H10N0O6S0	10	10	0	6	0
324.051	4386956	C17H11N1O6S0	17	11	1	6	0
286.072	4387391	C15H13N1O5S0	15	13	1	5	0
304.119	4388399	C16H19N1O5S0	16	19	1	5	0
312.051	4390132	C16H11N1O6S0	16	11	1	6	0
655.167	4393053	C32H32N0O15S0	32	32	0	15	0
497	4398448	C22H10N0O14S0	22	10	0	14	0
282.992	4403502	C11H8N0O7S1	11	8	0	7	1
373.089	4405847	C14H18N2O10S0	14	18	2	10	0
677.245	4406266	C33H42N0O15S0	33	42	0	15	0
442.993	4407786	C16H12N0O13S1	16	12	0	13	1
689.078	4409825	C33H22N0O17S0	33	22	0	17	0
555.005	4409984	C24H12N0O16S0	24	12	0	16	0
363.12	4412687	C17H20N2O7S0	17	20	2	7	0
386.015	4420508	C17H9N1O10S0	17	9	1	10	0
547	4420977	C22H12N0O17S0	22	12	0	17	0
459.239	4421155	C26H36N0O7S0	26	36	0	7	0
338.067	4427318	C18H13N1O6S0	18	13	1	6	0
729.095	4431471	C32H26N0O20S0	32	26	0	20	0
355.155	4432975	C21H24N0O5S0	21	24	0	5	0
455.138	4440464	C21H28N0O9S1	21	28	0	9	1
339.039	4442594	C11H16N0O10S1	11	16	0	10	1
447.072	4446333	C24H16N0O9S0	24	16	0	9	0
663.062	4452023	C31H20N0O17S0	31	20	0	17	0
560.031	4452609	C23H15N1O16S0	23	15	1	16	0
383.037	4453457	C14H12N2O11S0	14	12	2	11	0
567.151	4455311	C29H28N0O12S0	29	28	0	12	0
589.141	4457661	C24H30N0O17S0	24	30	0	17	0
312.999	4458448	C15H6N0O8S0	15	6	0	8	0
601.141	4460032	C25H30N0O17S0	25	30	0	17	0
440.098	4460691	C22H19N1O9S0	22	19	1	9	0
379.012	4462646	C16H12N0O9S1	16	12	0	9	1
381.134	4463332	C22H22N0O6S0	22	22	0	6	0
395.008	4463535	C16H12N0O10S1	16	12	0	10	1
356.135	4464818	C16H23N1O8S0	16	23	1	8	0
525.1	4471351	C21H22N2O14S0	21	22	2	14	0
564.135	4472085	C25H27N1O14S0	25	27	1	14	0
665.078	4474904	C31H22N0O17S0	31	22	0	17	0
673.178	4475001	C32H34N0O16S0	32	34	0	16	0
685.141	4475187	C32H30N0O17S0	32	30	0	17	0
287.004	4476970	C10H8N0O10S0	10	8	0	10	0
507.13	4477004	C27H24N0O10S0	27	24	0	10	0
296.056	4478084	C16H11N1O5S0	16	11	1	5	0
487.1	4479335	C22H20N2O11S0	22	20	2	11	0
418.005	4481295	C17H9N1O12S0	17	9	1	12	0
649.048	4482144	C30H18N0O17S0	30	18	0	17	0
468.093	4484250	C23H19N1O10S0	23	19	1	10	0
317.082	4486409	C20H14N0O4S0	20	14	0	4	0
421.125	4491198	C19H22N2O9S0	19	22	2	9	0
333.119	4491476	C14H22N0O9S0	14	22	0	9	0
525.235	4492436	C26H38N0O11S0	26	38	0	11	0
524.032	4492612	C20H15N1O16S0	20	15	1	16	0
421.099	4499735	C16H22N0O13S0	16	22	0	13	0
391.124	4502253	C16H24N0O11S0	16	24	0	11	0
261.062	4502473	C10H14N0O8S0	10	14	0	8	0
463.103	4507110	C25H20N0O9S0	25	20	0	9	0
575.126	4510018	C23H28N0O17S0	23	28	0	17	0
607.037	4510204	C28H16N0O16S0	28	16	0	16	0
484.125	4510246	C24H23N1O10S0	24	23	1	10	0
379.088	4511454	C14H20N0O12S0	14	20	0	12	0
632.089	4520042	C27H23N1O17S0	27	23	1	17	0
344.992	4523111	C12H10N0O10S1	12	10	0	10	1
478.993	4524032	C19H12N0O13S1	19	12	0	13	1
297.113	4525237	C18H18N0O4S0	18	18	0	4	0
299.059	4528304	C13H16N0O6S1	13	16	0	6	1
425.218	4533764	C22H34N0O8S0	22	34	0	8	0
305.07	4540581	C12H18N0O7S1	12	18	0	7	1
321.037	4540952	C13H10N2O8S0	13	10	2	8	0
643.204	4542667	C32H36N0O14S0	32	36	0	14	0
351.124	4543177	C21H20N0O5S0	21	20	0	5	0
280.994	4543535	C11H6N0O9S0	11	6	0	9	0
281.078	4544715	C12H14N2O6S0	12	14	2	6	0
533.036	4552679	C26H14N0O13S0	26	14	0	13	0
289.039	4553572	C11H14N0O7S1	11	14	0	7	1
477.079	4555948	C20H18N2O12S0	20	18	2	12	0
519.136	4556115	C21H28N0O15S0	21	28	0	15	0
551.011	4557434	C25H12N0O15S0	25	12	0	15	0
549.099	4558869	C23H22N2O14S0	23	22	2	14	0
305.176	4560962	C18H26N0O4S0	18	26	0	4	0
269.009	4562331	C14H6N0O6S0	14	6	0	6	0
443.138	4564566	C20H28N0O9S1	20	28	0	9	1
580.095	4566266	C24H23N1O16S0	24	23	1	16	0
508.146	4568342	C23H27N1O12S0	23	27	1	12	0
651.136	4568758	C32H28N0O15S0	32	28	0	15	0
409.072	4570281	C25H14N0O6S0	25	14	0	6	0
635.068	4571865	C30H20N0O16S0	30	20	0	16	0
477.156	4572061	C27H26N0O8S0	27	26	0	8	0
679.152	4573461	C30H32N0O18S0	30	32	0	18	0
577.063	4577224	C28H18N0O14S0	28	18	0	14	0
274.072	4578037	C14H13N1O5S0	14	13	1	5	0
392.135	4581557	C19H23N1O8S0	19	23	1	8	0
529.244	4585953	C29H38N0O9S0	29	38	0	9	0
599.214	4587168	C31H36N0O12S0	31	36	0	12	0
559.255	4589434	C30H40N0O10S0	30	40	0	10	0
604.094	4590979	C26H23N1O16S0	26	23	1	16	0
352.046	4591392	C18H11N1O7S0	18	11	1	7	0
703.079	4592296	C30H24N0O20S0	30	24	0	20	0
243.087	4592713	C11H16N0O6S0	11	16	0	6	0
398.088	4597055	C20H17N1O8S0	20	17	1	8	0
458.987	4598658	C16H12N0O14S1	16	12	0	14	1
249.004	4599944	C11H6N0O7S0	11	6	0	7	0
424.068	4600901	C21H15N1O9S0	21	15	1	9	0
651.23	4601030	C31H40N0O15S0	31	40	0	15	0
330.994	4601786	C11H8N0O12S0	11	8	0	12	0
468.151	4604919	C21H27N1O11S0	21	27	1	11	0
268.994	4605223	C10H6N0O9S0	10	6	0	9	0
524.141	4609321	C23H27N1O13S0	23	27	1	13	0
442.135	4609399	C19H25N1O11S0	19	25	1	11	0
701.136	4609694	C32H30N0O18S0	32	30	0	18	0
563.047	4612474	C27H16N0O14S0	27	16	0	14	0
445.223	4613413	C25H34N0O7S0	25	34	0	7	0
401.003	4614779	C11H14N0O14S1	11	14	0	14	1
382.989	4614928	C14H8N0O13S0	14	8	0	13	0
675.193	4617148	C32H36N0O16S0	32	36	0	16	0
384.987	4622380	C14H10N0O11S1	14	10	0	11	1
355.115	4624659	C15H20N2O8S0	15	20	2	8	0
416.135	4625825	C21H23N1O8S0	21	23	1	8	0
268.061	4625851	C15H11N1O4S0	15	11	1	4	0
701.099	4629277	C31H26N0O19S0	31	26	0	19	0
531.261	4630077	C29H40N0O9S0	29	40	0	9	0
524.995	4632146	C23H10N0O15S0	23	10	0	15	0
415.018	4632436	C12H16N0O14S1	12	16	0	14	1
514.026	4634755	C22H13N1O14S0	22	13	1	14	0
371.11	4635235	C15H20N2O9S0	15	20	2	9	0
303.103	4637732	C20H16N0O3S0	20	16	0	3	0
572.089	4642496	C22H23N1O17S0	22	23	1	17	0
454.993	4642846	C17H12N0O13S1	17	12	0	13	1
457.208	4644730	C22H34N0O10S0	22	34	0	10	0
418.099	4645399	C16H21N1O12S0	16	21	1	12	0
679.094	4647693	C32H24N0O17S0	32	24	0	17	0
369.171	4649240	C22H26N0O5S0	22	26	0	5	0
517.074	4651653	C22H18N2O13S0	22	18	2	13	0
374.125	4654732	C19H21N1O7S0	19	21	1	7	0
403.115	4659344	C19H20N2O8S0	19	20	2	8	0
427.042	4661072	C19H12N2O10S0	19	12	2	10	0
489.249	4662381	C27H38N0O8S0	27	38	0	8	0
397.126	4664506	C17H22N2O9S0	17	22	2	9	0
553.011	4665249	C21H14N0O18S0	21	14	0	18	0
442.989	4671588	C19H8N0O13S0	19	8	0	13	0
433.057	4677556	C23H14N0O9S0	23	14	0	9	0
436.031	4680727	C21H11N1O10S0	21	11	1	10	0
669.13	4682964	C28H30N0O19S0	28	30	0	19	0
566.042	4686498	C22H17N1O17S0	22	17	1	17	0
381.171	4688470	C23H26N0O5S0	23	26	0	5	0
541.014	4689399	C17H18N0O18S1	17	18	0	18	1
308.989	4689949	C12H6N0O10S0	12	6	0	10	0
422.999	4690316	C20H8N0O11S0	20	8	0	11	0
297.004	4691793	C15H6N0O7S0	15	6	0	7	0
354.026	4692621	C17H9N1O8S0	17	9	1	8	0
590.079	4692760	C25H21N1O16S0	25	21	1	16	0
610.084	4697719	C28H21N1O15S0	28	21	1	15	0
711.157	4698106	C34H32N0O17S0	34	32	0	17	0
522.068	4707088	C25H17N1O12S0	25	17	1	12	0
343.042	4714309	C12H12N2O10S0	12	12	2	10	0
480.021	4715180	C22H11N1O12S0	22	11	1	12	0
287.071	4717073	C19H12N0O3S0	19	12	0	3	0
457.223	4717587	C26H34N0O7S0	26	34	0	7	0
489.079	4718770	C21H18N2O12S0	21	18	2	12	0
372.109	4719853	C19H19N1O7S0	19	19	1	7	0
362.124	4723050	C18H21N1O7S0	18	21	1	7	0
488.12	4726146	C23H23N1O11S0	23	23	1	11	0
423.032	4728188	C16H12N2O12S0	16	12	2	12	0
476.011	4731388	C19H11N1O14S0	19	11	1	14	0
482.109	4739032	C24H21N1O10S0	24	21	1	10	0
537.1	4740897	C22H22N2O14S0	22	22	2	14	0
655.188	4741728	C29H36N0O17S0	29	36	0	17	0
556.037	4742664	C24H15N1O15S0	24	15	1	15	0
430.026	4742843	C15H13N1O14S0	15	13	1	14	0
437.161	4746785	C25H26N0O7S0	25	26	0	7	0
540.063	4747264	C21H19N1O16S0	21	19	1	16	0
631.021	4747374	C26H16N0O19S0	26	16	0	19	0
309.065	4750185	C11H18N0O8S1	11	18	0	8	1
315.084	4751404	C12H16N2O8S0	12	16	2	8	0
510.031	4753304	C23H13N1O13S0	23	13	1	13	0
291.062	4756738	C13H12N2O6S0	13	12	2	6	0
290.103	4765058	C15H17N1O5S0	15	17	1	5	0
669.095	4766670	C27H26N0O20S0	27	26	0	20	0
301.051	4768816	C19H10N0O4S0	19	10	0	4	0
635.234	4768878	C31H40N0O14S0	31	40	0	14	0
467.131	4770687	C20H24N2O11S0	20	24	2	11	0
695.125	4773058	C33H28N0O17S0	33	28	0	17	0
427.078	4773639	C20H16N2O9S0	20	16	2	9	0
317.078	4777093	C15H14N2O6S0	15	14	2	6	0
368.078	4778364	C19H15N1O7S0	19	15	1	7	0
309.029	4779589	C10H14N0O9S1	10	14	0	9	1
524.047	4782400	C24H15N1O13S0	24	15	1	13	0
328.083	4785261	C17H15N1O6S0	17	15	1	6	0
295.094	4789501	C13H16N2O6S0	13	16	2	6	0
411.051	4791119	C24H12N0O7S0	24	12	0	7	0
313.051	4792586	C20H10N0O4S0	20	10	0	4	0
663.194	4794830	C31H36N0O16S0	31	36	0	16	0
245.009	4796948	C12H6N0O6S0	12	6	0	6	0
502.135	4797609	C24H25N1O11S0	24	25	1	11	0
695.074	4799679	C28H24N0O21S0	28	24	0	21	0
472.016	4801806	C20H11N1O13S0	20	11	1	13	0
282.098	4802325	C13H17N1O6S0	13	17	1	6	0
614.078	4804903	C27H21N1O16S0	27	21	1	16	0
439.07	4806297	C19H20N0O10S1	19	20	0	10	1
475.135	4810199	C22H24N2O10S0	22	24	2	10	0
305.078	4811180	C14H14N2O6S0	14	14	2	6	0
373.104	4816941	C18H18N2O7S0	18	18	2	7	0
583.022	4818895	C22H16N0O19S0	22	16	0	19	0
407.044	4819029	C18H16N0O9S1	18	16	0	9	1
538.048	4819297	C21H17N1O16S0	21	17	1	16	0
649.032	4820317	C26H18N0O20S0	26	18	0	20	0
479.171	4820478	C27H28N0O8S0	27	28	0	8	0
243.066	4821061	C14H12N0O4S0	14	12	0	4	0
490.136	4822822	C23H25N1O11S0	23	25	1	11	0
683.126	4826168	C32H28N0O17S0	32	28	0	17	0
369.192	4828598	C19H30N0O7S0	19	30	0	7	0
687.194	4833053	C33H36N0O16S0	33	36	0	16	0
667.167	4835459	C33H32N0O15S0	33	32	0	15	0
318.047	4841008	C11H13N1O10S0	11	13	1	10	0
346.078	4844539	C13H17N1O10S0	13	17	1	10	0
415.042	4844565	C18H12N2O10S0	18	12	2	10	0
371.056	4850967	C22H12N0O6S0	22	12	0	6	0
353.197	4855558	C19H30N0O6S0	19	30	0	6	0
370.989	4856888	C13H8N0O13S0	13	8	0	13	0
528.1	4859418	C21H23N1O15S0	21	23	1	15	0
441.213	4860190	C22H34N0O9S0	22	34	0	9	0
252.051	4863351	C11H11N1O6S0	11	11	1	6	0
501.249	4864244	C28H38N0O8S0	28	38	0	8	0
241.051	4864605	C14H10N0O4S0	14	10	0	4	0
519.021	4867943	C25H12N0O13S0	25	12	0	13	0
524.083	4869943	C25H19N1O12S0	25	19	1	12	0
627.172	4871122	C31H32N0O14S0	31	32	0	14	0
417.094	4872438	C19H18N2O9S0	19	18	2	9	0
381.028	4876947	C16H14N0O9S1	16	14	0	9	1
637.214	4880499	C30H38N0O15S0	30	38	0	15	0
355.085	4881192	C16H20N0O7S1	16	20	0	7	1
379.119	4881480	C22H20N0O6S0	22	20	0	6	0
563.089	4888770	C21H24N0O18S0	21	24	0	18	0
562.12	4891781	C25H25N1O14S0	25	25	1	14	0
363.054	4895088	C17H16N0O7S1	17	16	0	7	1
382.992	4895892	C11H12N0O13S1	11	12	0	13	1
307.031	4897251	C10H12N0O11S0	10	12	0	11	0
602.116	4897325	C27H25N1O15S0	27	25	1	15	0
316.031	4899792	C11H11N1O10S0	11	11	1	10	0
264.051	4900903	C12H11N1O6S0	12	11	1	6	0
571.218	4906243	C30H36N0O11S0	30	36	0	11	0
649.142	4911983	C29H30N0O17S0	29	30	0	17	0
566.115	4915122	C24H25N1O15S0	24	25	1	15	0
432.078	4916022	C16H19N1O13S0	16	19	1	13	0
565.135	4918500	C29H26N0O12S0	29	26	0	12	0
355.034	4921948	C11H16N0O11S1	11	16	0	11	1
579.114	4923212	C29H24N0O13S0	29	24	0	13	0
605.1	4924589	C23H26N0O19S0	23	26	0	19	0
507.097	4925253	C23H24N0O11S1	23	24	0	11	1
585.016	4925668	C25H14N0O17S0	25	14	0	17	0
342.011	4926975	C12H9N1O11S0	12	9	1	11	0
643.152	4950724	C27H32N0O18S0	27	32	0	18	0
510.105	4957471	C25H21N1O11S0	25	21	1	11	0
307.093	4960927	C14H16N2O6S0	14	16	2	6	0
699.105	4970483	C28H28N0O21S0	28	28	0	21	0
387.112	4971364	C17H24N0O8S1	17	24	0	8	1
359.074	4975368	C13H16N2O10S0	13	16	2	10	0
395.037	4978838	C15H12N2O11S0	15	12	2	11	0
353.139	4982832	C21H22N0O5S0	21	22	0	5	0
613.156	4984444	C30H30N0O14S0	30	30	0	14	0
405.122	4985893	C17H26N0O9S1	17	26	0	9	1
562.048	4988791	C23H17N1O16S0	23	17	1	16	0
339.054	4991224	C15H16N0O7S1	15	16	0	7	1
481.008	5003267	C19H14N0O13S1	19	14	0	13	1
531.172	5003476	C23H32N0O14S0	23	32	0	14	0
627.208	5003733	C32H36N0O13S0	32	36	0	13	0
535.125	5003742	C28H24N0O11S0	28	24	0	11	0
423.078	5008001	C15H20N0O14S0	15	20	0	14	0
470.13	5013733	C20H25N1O12S0	20	25	1	12	0
581.166	5015599	C30H30N0O12S0	30	30	0	12	0
561.1	5017027	C24H22N2O14S0	24	22	2	14	0
679.115	5020176	C29H28N0O19S0	29	28	0	19	0
457.074	5023194	C17H18N2O13S0	17	18	2	13	0
527.094	5026090	C24H20N2O12S0	24	20	2	12	0
387.051	5028754	C22H12N0O7S0	22	12	0	7	0
266.031	5029384	C11H9N1O7S0	11	9	1	7	0
493.005	5030608	C23H10N0O13S0	23	10	0	13	0
526.026	5035846	C23H13N1O14S0	23	13	1	14	0
371.037	5035900	C13H12N2O11S0	13	12	2	11	0
616.095	5039245	C27H23N1O16S0	27	23	1	16	0
288.088	5040449	C15H15N1O5S0	15	15	1	5	0
494.037	5040764	C23H13N1O12S0	23	13	1	12	0
595.11	5047468	C29H24N0O14S0	29	24	0	14	0
389.067	5050024	C22H14N0O7S0	22	14	0	7	0
377.127	5050618	C16H26N0O8S1	16	26	0	8	1
549.031	5052435	C26H14N0O14S0	26	14	0	14	0
401.067	5054033	C23H14N0O7S0	23	14	0	7	0
381.086	5063778	C14H22N0O10S1	14	22	0	10	1
425.12	5065008	C18H22N2O10S0	18	22	2	10	0
413.048	5066918	C15H14N2O12S0	15	14	2	12	0
535	5069180	C21H12N0O17S0	21	12	0	17	0
453.192	5070197	C26H30N0O7S0	26	30	0	7	0
577.027	5072065	C27H14N0O15S0	27	14	0	15	0
563.25	5074274	C29H40N0O11S0	29	40	0	11	0
370.02	5078485	C17H9N1O9S0	17	9	1	9	0
363.015	5078839	C19H8N0O8S0	19	8	0	8	0
589.011	5080240	C24H14N0O18S0	24	14	0	18	0
407.208	5082293	C22H32N0O7S0	22	32	0	7	0
401.182	5082539	C19H30N0O9S0	19	30	0	9	0
417.062	5085128	C23H14N0O8S0	23	14	0	8	0
677.173	5085935	C31H34N0O17S0	31	34	0	17	0
705.094	5086617	C30H26N0O20S0	30	26	0	20	0
725.1	5088155	C33H26N0O19S0	33	26	0	19	0
645.037	5088995	C27H18N0O19S0	27	18	0	19	0
608.126	5091879	C26H27N1O16S0	26	27	1	16	0
319.097	5092440	C20H16N0O4S0	20	16	0	4	0
699.048	5096562	C30H20N0O20S0	30	20	0	20	0
637.033	5102939	C25H18N0O20S0	25	18	0	20	0
697.09	5103145	C28H26N0O21S0	28	26	0	21	0
330.098	5103212	C17H17N1O6S0	17	17	1	6	0
441.058	5108002	C20H14N2O10S0	20	14	2	10	0
375.088	5113173	C22H16N0O6S0	22	16	0	6	0
431.138	5113721	C19H28N0O9S1	19	28	0	9	1
461.12	5120210	C21H22N2O10S0	21	22	2	10	0
317.176	5126716	C19H26N0O4S0	19	26	0	4	0
592.131	5129677	C26H27N1O15S0	26	27	1	15	0
407.077	5138691	C22H16N0O8S0	22	16	0	8	0
396.036	5138700	C19H11N1O9S0	19	11	1	9	0
541.208	5139677	C29H34N0O10S0	29	34	0	10	0
467.171	5144384	C26H28N0O8S0	26	28	0	8	0
568.095	5145435	C23H23N1O16S0	23	23	1	16	0
527.228	5147142	C29H36N0O9S0	29	36	0	9	0
639.136	5148283	C31H28N0O15S0	31	28	0	15	0
361.104	5152029	C17H18N2O7S0	17	18	2	7	0
717.095	5158438	C31H26N0O20S0	31	26	0	20	0
391.115	5158496	C18H20N2O8S0	18	20	2	8	0
631.203	5164419	C31H36N0O14S0	31	36	0	14	0
366.026	5170296	C18H9N1O8S0	18	9	1	8	0
486.052	5170821	C18H17N1O15S0	18	17	1	15	0
297.073	5175452	C12H14N2O7S0	12	14	2	7	0
326.015	5177175	C12H9N1O10S0	12	9	1	10	0
657.147	5180080	C31H30N0O16S0	31	30	0	16	0
679.188	5181723	C31H36N0O17S0	31	36	0	17	0
457.053	5184760	C20H14N2O11S0	20	14	2	11	0
486.125	5184862	C20H25N1O13S0	20	25	1	13	0
358.114	5191308	C15H21N1O9S0	15	21	1	9	0
411.075	5197424	C18H20N0O9S1	18	20	0	9	1
482.022	5200995	C18H13N1O15S0	18	13	1	15	0
339.018	5207106	C14H12N0O8S1	14	12	0	8	1
357.077	5210138	C22H14N0O5S0	22	14	0	5	0
689.173	5217770	C32H34N0O17S0	32	34	0	17	0
353.034	5219540	C15H14N0O8S1	15	14	0	8	1
523	5224252	C20H12N0O17S0	20	12	0	17	0
473.12	5225799	C22H22N2O10S0	22	22	2	10	0
410.988	5226871	C12H12N0O14S1	12	12	0	14	1
255.015	5229130	C10H8N0O8S0	10	8	0	8	0
239.02	5230998	C10H8N0O7S0	10	8	0	7	0
505.244	5233755	C27H38N0O9S0	27	38	0	9	0
395.004	5234475	C19H8N0O10S0	19	8	0	10	0
437.124	5236711	C24H22N0O8S0	24	22	0	8	0
299.071	5241848	C20H12N0O3S0	20	12	0	3	0
303.018	5243296	C11H12N0O8S1	11	12	0	8	1
535.121	5244639	C23H24N2O13S0	23	24	2	13	0
417.122	5245855	C18H26N0O9S1	18	26	0	9	1
293.078	5247168	C13H14N2O6S0	13	14	2	6	0
449.015	5250556	C22H10N0O11S0	22	10	0	11	0
521.105	5251807	C22H22N2O13S0	22	22	2	13	0
315.018	5254622	C12H12N0O8S1	12	12	0	8	1
303.062	5255427	C14H12N2O6S0	14	12	2	6	0
325.031	5255880	C12H10N2O9S0	12	10	2	9	0
491.026	5256130	C24H12N0O12S0	24	12	0	12	0
359.089	5256478	C17H16N2O7S0	17	16	2	7	0
553.171	5262897	C29H30N0O11S0	29	30	0	11	0
428.998	5265798	C12H14N0O15S1	12	14	0	15	1
345.156	5266075	C16H26N0O8S0	16	26	0	8	0
377.027	5267950	C15H10N2O10S0	15	10	2	10	0
583.204	5273578	C27H36N0O14S0	27	36	0	14	0
521.115	5275869	C20H26N0O16S0	20	26	0	16	0
351.057	5278053	C12H16N0O12S0	12	16	0	12	0
305.034	5279045	C11H14N0O8S1	11	14	0	8	1
491.099	5279116	C26H20N0O10S0	26	20	0	10	0
597.161	5279789	C30H30N0O13S0	30	30	0	13	0
359.117	5280072	C16H24N0O7S1	16	24	0	7	1
329.046	5285126	C20H10N0O5S0	20	10	0	5	0
272.056	5293814	C14H11N1O5S0	14	11	1	5	0
544.037	5293904	C23H15N1O15S0	23	15	1	15	0
319.025	5295164	C18H8N0O6S0	18	8	0	6	0
455.102	5295635	C20H24N0O10S1	20	24	0	10	1
659.162	5295886	C31H32N0O16S0	31	32	0	16	0
641.063	5296015	C25H22N0O20S0	25	22	0	20	0
536.031	5297163	C21H15N1O16S0	21	15	1	16	0
519.027	5304806	C18H16N0O18S0	18	16	0	18	0
509.105	5305643	C21H22N2O13S0	21	22	2	13	0
649.178	5311093	C30H34N0O16S0	30	34	0	16	0
479.058	5311965	C19H16N2O13S0	19	16	2	13	0
334.13	5314658	C17H21N1O6S0	17	21	1	6	0
509	5316252	C23H10N0O14S0	23	10	0	14	0
625.214	5323287	C29H38N0O15S0	29	38	0	15	0
617.225	5324491	C31H38N0O13S0	31	38	0	13	0
421.117	5325490	C17H26N0O10S1	17	26	0	10	1
492.993	5325637	C16H14N0O16S1	16	14	0	16	1
707.11	5330803	C30H28N0O20S0	30	28	0	20	0
312.109	5339764	C14H19N1O7S0	14	19	1	7	0
400.104	5343302	C20H19N1O8S0	20	19	1	8	0
407.083	5343499	C15H20N0O13S0	15	20	0	13	0
493.052	5343613	C23H14N2O11S0	23	14	2	11	0
521.109	5347038	C27H22N0O11S0	27	22	0	11	0
499.234	5348719	C28H36N0O8S0	28	36	0	8	0
631.167	5349374	C30H32N0O15S0	30	32	0	15	0
497.105	5354943	C20H22N2O13S0	20	22	2	13	0
372.021	5354992	C13H11N1O12S0	13	11	1	12	0
235.025	5358923	C11H8N0O6S0	11	8	0	6	0
361.031	5359411	C15H10N2O9S0	15	10	2	9	0
560.104	5363214	C25H23N1O14S0	25	23	1	14	0
333.077	5363542	C20H14N0O5S0	20	14	0	5	0
590.115	5364764	C26H25N1O15S0	26	25	1	15	0
477.125	5367024	C19H26N0O14S0	19	26	0	14	0
295.057	5368327	C12H12N2O7S0	12	12	2	7	0
377.031	5369971	C20H10N0O8S0	20	10	0	8	0
338.125	5369996	C16H21N1O7S0	16	21	1	7	0
446.094	5376952	C17H21N1O13S0	17	21	1	13	0
278.103	5377544	C14H17N1O5S0	14	17	1	5	0
467.102	5382992	C21H24N0O10S1	21	24	0	10	1
427.046	5387991	C24H12N0O8S0	24	12	0	8	0
456.993	5388053	C13H14N0O16S1	13	14	0	16	1
452.995	5393198	C17H10N0O15S0	17	10	0	15	0
365.103	5394117	C21H18N0O6S0	21	18	0	6	0
245.03	5398081	C9H10N0O8S0	9	10	0	8	0
303.054	5400573	C12H16N0O7S1	12	16	0	7	1
464.994	5401685	C18H10N0O15S0	18	10	0	15	0
587.162	5402857	C25H32N0O16S0	25	32	0	16	0
307.098	5403619	C19H16N0O4S0	19	16	0	4	0
379.01	5403826	C19H8N0O9S0	19	8	0	9	0
645.131	5405170	C26H30N0O19S0	26	30	0	19	0
568.074	5406166	C26H19N1O14S0	26	19	1	14	0
332.062	5406794	C12H15N1O10S0	12	15	1	10	0
509.182	5412917	C28H30N0O9S0	28	30	0	9	0
305.088	5413300	C12H18N0O9S0	12	18	0	9	0
625.157	5419026	C31H30N0O14S0	31	30	0	14	0
408.021	5421066	C16H11N1O12S0	16	11	1	12	0
603.084	5421912	C23H24N0O19S0	23	24	0	19	0
651.193	5422016	C30H36N0O16S0	30	36	0	16	0
313.145	5428659	C19H22N0O4S0	19	22	0	4	0
565.099	5430236	C28H22N0O13S0	28	22	0	13	0
427.107	5432243	C19H24N0O9S1	19	24	0	9	1
291.018	5432360	C10H12N0O8S1	10	12	0	8	1
378.01	5436103	C15H9N1O11S0	15	9	1	11	0
675.121	5438385	C30H28N0O18S0	30	28	0	18	0
549.109	5442838	C21H26N0O17S0	21	26	0	17	0
335.186	5445562	C19H28N0O5S0	19	28	0	5	0
497.039	5446478	C20H18N0O13S1	20	18	0	13	1
491.058	5447650	C20H16N2O13S0	20	16	2	13	0
365.197	5447757	C20H30N0O6S0	20	30	0	6	0
269.139	5448358	C14H22N0O5S0	14	22	0	5	0
465.057	5451708	C22H14N2O10S0	22	14	2	10	0
446.987	5458162	C15H12N0O14S1	15	12	0	14	1
315.16	5458950	C19H24N0O4S0	19	24	0	4	0
329.082	5466298	C21H14N0O4S0	21	14	0	4	0
502.026	5468661	C21H13N1O14S0	21	13	1	14	0
536.047	5470344	C25H15N1O13S0	25	15	1	13	0
512.995	5472924	C22H10N0O15S0	22	10	0	15	0
395.15	5474413	C23H24N0O6S0	23	24	0	6	0
581.021	5477527	C26H14N0O16S0	26	14	0	16	0
373.036	5480076	C21H10N0O7S0	21	10	0	7	0
536.141	5481971	C24H27N1O13S0	24	27	1	13	0
459.068	5483784	C20H16N2O11S0	20	16	2	11	0
607.022	5484539	C24H16N0O19S0	24	16	0	19	0
671.111	5485603	C27H28N0O20S0	27	28	0	20	0
496.146	5486563	C22H27N1O12S0	22	27	1	12	0
701.063	5488541	C30H22N0O20S0	30	22	0	20	0
457.11	5490519	C18H22N2O12S0	18	22	2	12	0
489.115	5496921	C22H22N2O11S0	22	22	2	11	0
410.052	5499756	C20H13N1O9S0	20	13	1	9	0
426.083	5503007	C21H17N1O9S0	21	17	1	9	0
483.096	5505908	C21H24N0O11S1	21	24	0	11	1
460.016	5507628	C19H11N1O13S0	19	11	1	13	0
303.16	5510931	C18H24N0O4S0	18	24	0	4	0
423.145	5515364	C24H24N0O7S0	24	24	0	7	0
527.213	5516298	C25H36N0O12S0	25	36	0	12	0
463.234	5519869	C25H36N0O8S0	25	36	0	8	0
356.078	5521757	C18H15N1O7S0	18	15	1	7	0
469.117	5524366	C21H26N0O10S1	21	26	0	10	1
449.088	5526132	C24H18N0O9S0	24	18	0	9	0
661.032	5530196	C27H18N0O20S0	27	18	0	20	0
639.026	5532780	C28H16N0O18S0	28	16	0	18	0
431.077	5535131	C24H16N0O8S0	24	16	0	8	0
463.042	5537344	C22H12N2O10S0	22	12	2	10	0
402.01	5537859	C17H9N1O11S0	17	9	1	11	0
339.124	5538400	C20H20N0O5S0	20	20	0	5	0
453.057	5543702	C21H14N2O10S0	21	14	2	10	0
431.109	5551693	C20H20N2O9S0	20	20	2	9	0
705.131	5555096	C31H30N0O19S0	31	30	0	19	0
611.141	5555619	C30H28N0O14S0	30	28	0	14	0
418.063	5557346	C15H17N1O13S0	15	17	1	13	0
508.037	5558786	C20H15N1O15S0	20	15	1	15	0
491.062	5563751	C25H16N0O11S0	25	16	0	11	0
399.075	5565158	C17H20N0O9S1	17	20	0	9	1
592.095	5565642	C25H23N1O16S0	25	23	1	16	0
345.077	5567013	C21H14N0O5S0	21	14	0	5	0
398.146	5571468	C18H25N1O9S0	18	25	1	9	0
537.234	5576197	C27H38N0O11S0	27	38	0	11	0
443.095	5580432	C17H20N2O12S0	17	20	2	12	0
452.157	5584195	C21H27N1O10S0	21	27	1	10	0
275.071	5585834	C18H12N0O3S0	18	12	0	3	0
355.049	5594995	C15H16N0O8S1	15	16	0	8	1
593.094	5597722	C29H22N0O14S0	29	22	0	14	0
573.234	5604021	C30H38N0O11S0	30	38	0	11	0
321.065	5606781	C12H18N0O8S1	12	18	0	8	1
649.214	5608059	C31H38N0O15S0	31	38	0	15	0
319.094	5608595	C15H16N2O6S0	15	16	2	6	0
319.103	5609696	C13H20N0O9S0	13	20	0	9	0
340.046	5610180	C17H11N1O7S0	17	11	1	7	0
424.016	5614711	C16H11N1O13S0	16	11	1	13	0
523.084	5615016	C21H20N2O14S0	21	20	2	14	0
285.004	5619988	C14H6N0O7S0	14	6	0	7	0
361.072	5620974	C21H14N0O6S0	21	14	0	6	0
647.162	5624369	C30H32N0O16S0	30	32	0	16	0
488.01	5628677	C20H11N1O14S0	20	11	1	14	0
400.125	5635938	C17H23N1O10S0	17	23	1	10	0
546.125	5641466	C25H25N1O13S0	25	25	1	13	0
507.024	5642805	C21H16N0O13S1	21	16	0	13	1
430.115	5644611	C21H21N1O9S0	21	21	1	9	0
565.026	5653453	C26H14N0O15S0	26	14	0	15	0
387.047	5655693	C17H12N2O9S0	17	12	2	9	0
493.113	5659190	C26H22N0O10S0	26	22	0	10	0
263.071	5660956	C17H12N0O3S0	17	12	0	3	0
249.113	5661018	C14H18N0O4S0	14	18	0	4	0
599.177	5661086	C30H32N0O13S0	30	32	0	13	0
295.098	5672223	C18H16N0O4S0	18	16	0	4	0
586.083	5673066	C26H21N1O15S0	26	21	1	15	0
323.008	5677642	C10H12N0O10S1	10	12	0	10	1
331.057	5681365	C15H12N2O7S0	15	12	2	7	0
319.057	5681573	C14H12N2O7S0	14	12	2	7	0
357.04	5687140	C21H10N0O6S0	21	10	0	6	0
406.993	5704592	C13H12N0O13S1	13	12	0	13	1
651.063	5709226	C30H20N0O17S0	30	20	0	17	0
265.051	5712959	C16H10N0O4S0	16	10	0	4	0
337.06	5714777	C12H18N0O9S1	12	18	0	9	1
645.182	5728506	C31H34N0O15S0	31	34	0	15	0
399.105	5729165	C16H20N2O10S0	16	20	2	10	0
542.094	5729525	C25H21N1O13S0	25	21	1	13	0
623.067	5732445	C29H20N0O16S0	29	20	0	16	0
441.05	5733781	C18H18N0O11S1	18	18	0	11	1
549.067	5734292	C27H18N0O13S0	27	18	0	13	0
429.079	5734914	C16H18N2O12S0	16	18	2	12	0
602.079	5740075	C26H21N1O16S0	26	21	1	16	0
576.1	5740297	C25H23N1O15S0	25	23	1	15	0
305.082	5741487	C19H14N0O4S0	19	14	0	4	0
349.032	5743015	C14H10N2O9S0	14	10	2	9	0
343.078	5746172	C13H16N2O9S0	13	16	2	9	0
274.036	5749488	C13H9N1O6S0	13	9	1	6	0
507.126	5751372	C22H24N2O12S0	22	24	2	12	0
470.109	5751491	C23H21N1O10S0	23	21	1	10	0
355.061	5753604	C22H12N0O5S0	22	12	0	5	0
380.041	5753923	C19H11N1O8S0	19	11	1	8	0
433.125	5758752	C20H22N2O9S0	20	22	2	9	0
440.995	5766460	C16H10N0O15S0	16	10	0	15	0
439.107	5767124	C20H24N0O9S1	20	24	0	9	1
403.042	5768622	C17H12N2O10S0	17	12	2	10	0
501.079	5774234	C22H18N2O12S0	22	18	2	12	0
357.101	5778237	C16H22N0O7S1	16	22	0	7	1
390.01	5778713	C16H9N1O11S0	16	9	1	11	0
514.083	5779329	C20H21N1O15S0	20	21	1	15	0
419.077	5782168	C23H16N0O8S0	23	16	0	8	0
405.025	5785762	C21H10N0O9S0	21	10	0	9	0
422.146	5790236	C20H25N1O9S0	20	25	1	9	0
651.048	5805480	C26H20N0O20S0	26	20	0	20	0
631.116	5808249	C25H28N0O19S0	25	28	0	19	0
509.145	5808816	C27H26N0O10S0	27	26	0	10	0
529.014	5810208	C16H18N0O18S1	16	18	0	18	1
295.155	5811330	C16H24N0O5S0	16	24	0	5	0
558.052	5813300	C24H17N1O15S0	24	17	1	15	0
591.078	5818227	C29H20N0O14S0	29	20	0	14	0
412.016	5819912	C15H11N1O13S0	15	11	1	13	0
463.067	5828330	C24H16N0O10S0	24	16	0	10	0
394.993	5829019	C12H12N0O13S1	12	12	0	13	1
339.181	5831862	C18H28N0O6S0	18	28	0	6	0
530.022	5837453	C22H13N1O15S0	22	13	1	15	0
300.051	5838750	C15H11N1O6S0	15	11	1	6	0
528.115	5841941	C25H23N1O12S0	25	23	1	12	0
371.081	5844153	C16H20N0O8S1	16	20	0	8	1
293.034	5847910	C10H14N0O8S1	10	14	0	8	1
479.131	5856069	C21H24N2O11S0	21	24	2	11	0
532.037	5859821	C22H15N1O15S0	22	15	1	15	0
342.026	5863126	C16H9N1O8S0	16	9	1	8	0
314.999	5865225	C11H8N0O11S0	11	8	0	11	0
369.013	5867063	C11H14N0O12S1	11	14	0	12	1
276.999	5878821	C12H6N0O8S0	12	6	0	8	0
455.208	5880323	C26H32N0O7S0	26	32	0	7	0
337.108	5884705	C20H18N0O5S0	20	18	0	5	0
495.09	5889417	C20H20N2O13S0	20	20	2	13	0
363.088	5889888	C21H16N0O6S0	21	16	0	6	0
321.077	5891725	C19H14N0O5S0	19	14	0	5	0
426.994	5899335	C19H8N0O12S0	19	8	0	12	0
453.049	5899401	C19H18N0O11S1	19	18	0	11	1
347.02	5900406	C19H8N0O7S0	19	8	0	7	0
609.125	5907280	C30H26N0O14S0	30	26	0	14	0
473.218	5915103	C26H34N0O8S0	26	34	0	8	0
611.199	5916070	C28H36N0O15S0	28	36	0	15	0
526.099	5917491	C25H21N1O12S0	25	21	1	12	0
526.12	5926702	C22H25N1O14S0	22	25	1	14	0
402.031	5927775	C14H13N1O13S0	14	13	1	13	0
517.11	5932928	C23H22N2O12S0	23	22	2	12	0
540.099	5933050	C22H23N1O15S0	22	23	1	15	0
391.082	5934389	C22H16N0O7S0	22	16	0	7	0
557.188	5937198	C25H34N0O14S0	25	34	0	14	0
361.035	5951288	C20H10N0O7S0	20	10	0	7	0
613.178	5959421	C27H34N0O16S0	27	34	0	16	0
653.173	5959435	C29H34N0O17S0	29	34	0	17	0
621.219	5962957	C30H38N0O14S0	30	38	0	14	0
631.079	5963380	C24H24N0O20S0	24	24	0	20	0
521.239	5964739	C27H38N0O10S0	27	38	0	10	0
482.073	5966376	C23H17N1O11S0	23	17	1	11	0
485.203	5967732	C23H34N0O11S0	23	34	0	11	0
500.104	5970558	C20H23N1O14S0	20	23	1	14	0
689.063	5976288	C29H22N0O20S0	29	22	0	20	0
535.088	5977959	C27H20N0O12S0	27	20	0	12	0
344.989	5987234	C15H6N0O10S0	15	6	0	10	0
495.126	5987495	C21H24N2O12S0	21	24	2	12	0
572.105	5992899	C26H23N1O14S0	26	23	1	14	0
329.161	5994667	C16H26N0O7S0	16	26	0	7	0
380.135	5996357	C18H23N1O8S0	18	23	1	8	0
439.176	5997380	C25H28N0O7S0	25	28	0	7	0
465.089	5997680	C17H22N0O15S0	17	22	0	15	0
585.197	5999099	C30H34N0O12S0	30	34	0	12	0
453.086	6002693	C20H22N0O10S1	20	22	0	10	1
593.224	6004772	C29H38N0O13S0	29	38	0	13	0
325.104	6009964	C14H18N2O7S0	14	18	2	7	0
689.136	6014951	C31H30N0O18S0	31	30	0	18	0
438.047	6026540	C21H13N1O10S0	21	13	1	10	0
473.047	6029782	C20H14N2O12S0	20	14	2	12	0
307.013	6033811	C10H12N0O9S1	10	12	0	9	1
661.178	6036333	C31H34N0O16S0	31	34	0	16	0
438.998	6040228	C17H12N0O12S1	17	12	0	12	1
311.089	6041826	C13H16N2O7S0	13	16	2	7	0
569.166	6041924	C29H30N0O12S0	29	30	0	12	0
511	6043878	C19H12N0O17S0	19	12	0	17	0
277.087	6044561	C18H14N0O3S0	18	14	0	3	0
661.141	6045287	C30H30N0O17S0	30	30	0	17	0
498.104	6049160	C24H21N1O11S0	24	21	1	11	0
480.057	6049759	C23H15N1O11S0	23	15	1	11	0
397.166	6053999	C23H26N0O6S0	23	26	0	6	0
441.115	6054272	C18H22N2O11S0	18	22	2	11	0
465.119	6057122	C25H22N0O9S0	25	22	0	9	0
553.229	6058295	C27H38N0O12S0	27	38	0	12	0
507.09	6065732	C21H20N2O13S0	21	20	2	13	0
574.084	6066281	C25H21N1O15S0	25	21	1	15	0
268.083	6068824	C12H15N1O6S0	12	15	1	6	0
507.021	6070836	C24H12N0O13S0	24	12	0	13	0
552.063	6072266	C22H19N1O16S0	22	19	1	16	0
573.146	6074274	C24H30N0O16S0	24	30	0	16	0
687.048	6089742	C29H20N0O20S0	29	20	0	20	0
357.171	6091044	C21H26N0O5S0	21	26	0	5	0
513.213	6093849	C28H34N0O9S0	28	34	0	9	0
599.198	6094495	C27H36N0O15S0	27	36	0	15	0
517.244	6094703	C28H38N0O9S0	28	38	0	9	0
627.193	6096340	C28H36N0O16S0	28	36	0	16	0
477.083	6098353	C25H18N0O10S0	25	18	0	10	0
433.02	6105852	C22H10N0O10S0	22	10	0	10	0
472.11	6107168	C19H23N1O13S0	19	23	1	13	0
340.997	6108243	C13H10N0O9S1	13	10	0	9	1
407.041	6108370	C21H12N0O9S0	21	12	0	9	0
609.219	6109780	C29H38N0O14S0	29	38	0	14	0
511.219	6111091	C25H36N0O11S0	25	36	0	11	0
436.016	6112894	C17H11N1O13S0	17	11	1	13	0
354.994	6113954	C13H8N0O12S0	13	8	0	12	0
327.047	6119032	C12H12N2O9S0	12	12	2	9	0
368.135	6119758	C17H23N1O8S0	17	23	1	8	0
402.104	6119872	C16H21N1O11S0	16	21	1	11	0
356.992	6122141	C13H10N0O10S1	13	10	0	10	1
415.1	6129383	C16H20N2O11S0	16	20	2	11	0
607.074	6131325	C29H20N0O15S0	29	20	0	15	0
363.112	6132356	C15H24N0O8S1	15	24	0	8	1
341.034	6142090	C14H14N0O8S1	14	14	0	8	1
270.041	6143301	C14H9N1O5S0	14	9	1	5	0
305.015	6148404	C10H10N0O11S0	10	10	0	11	0
591.245	6149762	C30H40N0O12S0	30	40	0	12	0
314.067	6153549	C16H13N1O6S0	16	13	1	6	0
467.029	6155225	C19H16N0O12S1	19	16	0	12	1
359.186	6156333	C21H28N0O5S0	21	28	0	5	0
459.105	6159684	C21H20N2O10S0	21	20	2	10	0
372.987	6163655	C13H10N0O11S1	13	10	0	11	1
369.05	6165611	C12H18N0O11S1	12	18	0	11	1
576.063	6168321	C24H19N1O16S0	24	19	1	16	0
444.115	6170000	C18H23N1O12S0	18	23	1	12	0
435.072	6171043	C23H16N0O9S0	23	16	0	9	0
397.06	6180705	C17H18N0O9S1	17	18	0	9	1
511.197	6185073	C28H32N0O9S0	28	32	0	9	0
669.11	6185937	C31H26N0O17S0	31	26	0	17	0
609.089	6190414	C29H22N0O15S0	29	22	0	15	0
667.152	6190976	C29H32N0O18S0	29	32	0	18	0
266.067	6194655	C12H13N1O6S0	12	13	1	6	0
405.062	6195156	C22H14N0O8S0	22	14	0	8	0
627.157	6196176	C27H32N0O17S0	27	32	0	17	0
655.058	6198858	C29H20N0O18S0	29	20	0	18	0
667.095	6203511	C31H24N0O17S0	31	24	0	17	0
467.058	6205321	C18H16N2O13S0	18	16	2	13	0
507.094	6208325	C26H20N0O11S0	26	20	0	11	0
665.063	6211861	C27H22N0O20S0	27	22	0	20	0
505.11	6212914	C22H22N2O12S0	22	22	2	12	0
347.186	6214510	C20H28N0O5S0	20	28	0	5	0
365.072	6229913	C13H18N0O12S0	13	18	0	12	0
671.053	6256921	C29H20N0O19S0	29	20	0	19	0
493.074	6257041	C20H18N2O13S0	20	18	2	13	0
338.015	6257257	C13H9N1O10S0	13	9	1	10	0
425.16	6265645	C24H26N0O7S0	24	26	0	7	0
245.082	6269810	C14H14N0O4S0	14	14	0	4	0
538.063	6271326	C25H17N1O13S0	25	17	1	13	0
475.233	6272747	C26H36N0O8S0	26	36	0	8	0
643.167	6273734	C31H32N0O15S0	31	32	0	15	0
444.042	6275865	C16H15N1O14S0	16	15	1	14	0
431.073	6277652	C19H16N2O10S0	19	16	2	10	0
613.142	6277883	C26H30N0O17S0	26	30	0	17	0
483.023	6278164	C19H16N0O13S1	19	16	0	13	1
303.066	6285063	C19H12N0O4S0	19	12	0	4	0
355.013	6285757	C14H12N0O9S1	14	12	0	9	1
693.095	6286651	C29H26N0O20S0	29	26	0	20	0
411.202	6293280	C21H32N0O8S0	21	32	0	8	0
327.091	6293301	C15H20N0O6S1	15	20	0	6	1
588.063	6294861	C25H19N1O16S0	25	19	1	16	0
409.024	6295142	C17H14N0O10S1	17	14	0	10	1
301.039	6297511	C12H14N0O7S1	12	14	0	7	1
637.047	6297949	C29H18N0O17S0	29	18	0	17	0
534.126	6301650	C24H25N1O13S0	24	25	1	13	0
503.094	6303057	C22H20N2O12S0	22	20	2	12	0
574.047	6309473	C24H17N1O16S0	24	17	1	16	0
327.018	6313103	C13H12N0O8S1	13	12	0	8	1
500.12	6318215	C24H23N1O11S0	24	23	1	11	0
379.107	6319288	C15H24N0O9S1	15	24	0	9	1
685.069	6322986	C30H22N0O19S0	30	22	0	19	0
588.1	6323025	C26H23N1O15S0	26	23	1	15	0
315.066	6324567	C20H12N0O4S0	20	12	0	4	0
282.026	6326051	C11H9N1O8S0	11	9	1	8	0
483.202	6333183	C27H32N0O8S0	27	32	0	8	0
314.031	6336419	C15H9N1O7S0	15	9	1	7	0
587.214	6338031	C30H36N0O12S0	30	36	0	12	0
427.197	6338749	C21H32N0O9S0	21	32	0	9	0
329.07	6343081	C14H18N0O7S1	14	18	0	7	1
288.051	6350668	C14H11N1O6S0	14	11	1	6	0
537.141	6361369	C28H26N0O11S0	28	26	0	11	0
485.105	6363514	C19H22N2O13S0	19	22	2	13	0
368.041	6365384	C18H11N1O8S0	18	11	1	8	0
309.171	6365524	C17H26N0O5S0	17	26	0	5	0
453.115	6367350	C19H22N2O11S0	19	22	2	11	0
625.12	6369294	C30H26N0O15S0	30	26	0	15	0
473.003	6369682	C17H14N0O14S1	17	14	0	14	1
288.999	6375917	C13H6N0O8S0	13	6	0	8	0
471.023	6378865	C18H16N0O13S1	18	16	0	13	1
377.109	6380769	C15H22N0O11S0	15	22	0	11	0
323.044	6382331	C11H16N0O9S1	11	16	0	9	1
357.094	6389427	C14H18N2O9S0	14	18	2	9	0
261.004	6390520	C12H6N0O7S0	12	6	0	7	0
341.07	6393536	C15H18N0O7S1	15	18	0	7	1
384.13	6395169	C17H23N1O9S0	17	23	1	9	0
665.172	6395432	C30H34N0O17S0	30	34	0	17	0
419.041	6402148	C22H12N0O9S0	22	12	0	9	0
420.13	6410896	C20H23N1O9S0	20	23	1	9	0
411.003	6423436	C16H12N0O11S1	16	12	0	11	1
535.095	6424805	C20H24N0O17S0	20	24	0	17	0
319.013	6428269	C11H12N0O9S1	11	12	0	9	1
349.104	6432147	C16H18N2O7S0	16	18	2	7	0
437.018	6436158	C18H14N0O11S1	18	14	0	11	1
227.056	6440090	C10H12N0O6S0	10	12	0	6	0
653.079	6440187	C30H22N0O17S0	30	22	0	17	0
426.998	6449933	C16H12N0O12S1	16	12	0	12	1
353.019	6450750	C11H14N0O11S1	11	14	0	11	1
273.056	6459193	C18H10N0O3S0	18	10	0	3	0
382.057	6460182	C19H13N1O8S0	19	13	1	8	0
543.224	6460555	C29H36N0O10S0	29	36	0	10	0
488.068	6468935	C18H19N1O15S0	18	19	1	15	0
301.145	6469045	C18H22N0O4S0	18	22	0	4	0
500.995	6469230	C21H10N0O15S0	21	10	0	15	0
399.112	6470423	C18H24N0O8S1	18	24	0	8	1
409.129	6473719	C23H22N0O7S0	23	22	0	7	0
316.994	6473950	C14H6N0O9S0	14	6	0	9	0
685.105	6476078	C31H26N0O18S0	31	26	0	18	0
693.131	6477374	C30H30N0O19S0	30	30	0	19	0
331.086	6482430	C14H20N0O7S1	14	20	0	7	1
329.034	6487669	C13H14N0O8S1	13	14	0	8	1
639.157	6487934	C28H32N0O17S0	28	32	0	17	0
433.135	6490800	C18H26N0O12S0	18	26	0	12	0
621.089	6492868	C30H22N0O15S0	30	22	0	15	0
585.182	6493177	C26H34N0O15S0	26	34	0	15	0
663.048	6495669	C27H20N0O20S0	27	20	0	20	0
353.103	6496571	C20H18N0O6S0	20	18	0	6	0
335.02	6501892	C18H8N0O7S0	18	8	0	7	0
315.054	6503177	C13H16N0O7S1	13	16	0	7	1
278.031	6503404	C12H9N1O7S0	12	9	1	7	0
389.197	6506967	C22H30N0O6S0	22	30	0	6	0
308.114	6507703	C15H19N1O6S0	15	19	1	6	0
350.125	6515199	C17H21N1O7S0	17	21	1	7	0
223.061	6524006	C11H12N0O5S0	11	12	0	5	0
619.204	6529090	C30H36N0O14S0	30	36	0	14	0
645.146	6538996	C30H30N0O16S0	30	30	0	16	0
641.042	6539660	C28H18N0O18S0	28	18	0	18	0
474.089	6540445	C18H21N1O14S0	18	21	1	14	0
623.104	6541408	C30H24N0O15S0	30	24	0	15	0
407.037	6545996	C16H12N2O11S0	16	12	2	11	0
523.003	6550843	C17H16N0O17S1	17	16	0	17	1
449.018	6557697	C19H14N0O11S1	19	14	0	11	1
469.008	6558431	C18H14N0O13S1	18	14	0	13	1
641.136	6562201	C27H30N0O18S0	27	30	0	18	0
411.039	6570302	C17H16N0O10S1	17	16	0	10	1
335.092	6575600	C20H16N0O5S0	20	16	0	5	0
237.077	6582653	C12H14N0O5S0	12	14	0	5	0
321.029	6585742	C11H14N0O9S1	11	14	0	9	1
593.057	6588439	C28H18N0O15S0	28	18	0	15	0
451.073	6592578	C16H20N0O15S0	16	20	0	15	0
375.051	6601378	C21H12N0O7S0	21	12	0	7	0
387.166	6601389	C18H28N0O9S0	18	28	0	9	0
488.994	6605909	C20H10N0O15S0	20	10	0	15	0
523.124	6607902	C27H24N0O11S0	27	24	0	11	0
342.994	6609662	C12H8N0O12S0	12	8	0	12	0
525.177	6609955	C28H30N0O10S0	28	30	0	10	0
389.099	6614484	C18H18N2O8S0	18	18	2	8	0
317.045	6632413	C19H10N0O5S0	19	10	0	5	0
635.198	6635626	C30H36N0O15S0	30	36	0	15	0
428.12	6636608	C18H23N1O11S0	18	23	1	11	0
579.042	6636863	C27H16N0O15S0	27	16	0	15	0
447.005	6639504	C15H12N0O16S0	15	12	0	16	0
483.06	6640964	C20H20N0O12S1	20	20	0	12	1
429.122	6641477	C19H26N0O9S1	19	26	0	9	1
453.042	6649213	C17H14N2O13S0	17	14	2	13	0
298.02	6655036	C11H9N1O9S0	11	9	1	9	0
478.135	6655409	C22H25N1O11S0	22	25	1	11	0
442.026	6657605	C16H13N1O14S0	16	13	1	14	0
421.02	6657956	C21H10N0O10S0	21	10	0	10	0
430.989	6662802	C18H8N0O13S0	18	8	0	13	0
597.016	6664485	C26H14N0O17S0	26	14	0	17	0
294.025	6666022	C12H9N1O8S0	12	9	1	8	0
615.027	6672725	C26H16N0O18S0	26	16	0	18	0
544.11	6685004	C25H23N1O13S0	25	23	1	13	0
494.13	6700367	C22H25N1O12S0	22	25	1	12	0
493.084	6700442	C18H22N0O16S0	18	22	0	16	0
489.161	6704909	C21H30N0O13S0	21	30	0	13	0
455.065	6713111	C19H20N0O11S1	19	20	0	11	1
349.096	6720520	C14H22N0O8S1	14	22	0	8	1
445.172	6721104	C20H30N0O11S0	20	30	0	11	0
341.099	6723307	C14H18N2O8S0	14	18	2	8	0
539.156	6738069	C28H28N0O11S0	28	28	0	11	0
426.047	6740457	C20H13N1O10S0	20	13	1	10	0
441.086	6742352	C19H22N0O10S1	19	22	0	10	1
520.037	6745010	C21H15N1O15S0	21	15	1	15	0
342.062	6752524	C17H13N1O7S0	17	13	1	7	0
455.058	6753291	C17H16N2O13S0	17	16	2	13	0
407.102	6766116	C16H24N0O10S1	16	24	0	10	1
291.03	6766447	C17H8N0O5S0	17	8	0	5	0
367.013	6768388	C15H12N0O9S1	15	12	0	9	1
433.223	6776122	C24H34N0O7S0	24	34	0	7	0
451.103	6776437	C24H20N0O9S0	24	20	0	9	0
346.042	6776900	C12H13N1O11S0	12	13	1	11	0
457.117	6781666	C20H26N0O10S1	20	26	0	10	1
667.058	6783600	C30H20N0O18S0	30	20	0	18	0
539.192	6786446	C29H32N0O10S0	29	32	0	10	0
512.068	6786708	C20H19N1O15S0	20	19	1	15	0
517.156	6787706	C22H30N0O14S0	22	30	0	14	0
577.229	6789865	C29H38N0O12S0	29	38	0	12	0
465.01	6792302	C22H10N0O12S0	22	10	0	12	0
500.068	6795625	C19H19N1O15S0	19	19	1	15	0
477.115	6798305	C21H22N2O11S0	21	22	2	11	0
412.031	6799006	C19H11N1O10S0	19	11	1	10	0
555.209	6800922	C26H36N0O13S0	26	36	0	13	0
521.042	6805356	C18H18N0O18S0	18	18	0	18	0
453.155	6805944	C25H26N0O8S0	25	26	0	8	0
521.036	6809325	C25H14N0O13S0	25	14	0	13	0
465.052	6822068	C16H18N0O16S0	16	18	0	16	0
421.093	6823694	C23H18N0O8S0	23	18	0	8	0
681.131	6823726	C29H30N0O19S0	29	30	0	19	0
438.14	6827970	C20H25N1O10S0	20	25	1	10	0
482.037	6830071	C22H13N1O12S0	22	13	1	12	0
468.057	6831072	C22H15N1O11S0	22	15	1	11	0
663.157	6833352	C30H32N0O17S0	30	32	0	17	0
547.131	6840049	C22H28N0O16S0	22	28	0	16	0
627.135	6849998	C30H28N0O15S0	30	28	0	15	0
687.121	6855702	C31H28N0O18S0	31	28	0	18	0
443.208	6860488	C25H32N0O7S0	25	32	0	7	0
487.182	6873160	C22H32N0O12S0	22	32	0	12	0
466.135	6878373	C21H25N1O11S0	21	25	1	11	0
657.183	6878391	C32H34N0O15S0	32	34	0	15	0
378.998	6879265	C12H12N0O12S1	12	12	0	12	1
391.042	6879615	C16H12N2O10S0	16	12	2	10	0
329.106	6886365	C15H22N0O6S1	15	22	0	6	1
463.063	6889955	C19H16N2O12S0	19	16	2	12	0
545.151	6890263	C23H30N0O15S0	23	30	0	15	0
402.998	6892018	C14H12N0O12S1	14	12	0	12	1
255.066	6895139	C15H12N0O4S0	15	12	0	4	0
458.109	6896592	C22H21N1O10S0	22	21	1	10	0
553.135	6902573	C28H26N0O12S0	28	26	0	12	0
454.136	6907665	C20H25N1O11S0	20	25	1	11	0
554.079	6912402	C22H21N1O16S0	22	21	1	16	0
457.008	6914734	C17H14N0O13S1	17	14	0	13	1
486.089	6917682	C19H21N1O14S0	19	21	1	14	0
462.141	6918893	C22H25N1O10S0	22	25	1	10	0
313.068	6919709	C12H14N2O8S0	12	14	2	8	0
481.15	6921542	C26H26N0O9S0	26	26	0	9	0
455.037	6924263	C20H12N2O11S0	20	12	2	11	0
495.13	6926251	C26H24N0O10S0	26	24	0	10	0
633.183	6930797	C30H34N0O15S0	30	34	0	15	0
450.141	6936894	C21H25N1O10S0	21	25	1	10	0
663.12	6947777	C29H28N0O18S0	29	28	0	18	0
481.005	6949503	C22H10N0O13S0	22	10	0	13	0
691.115	6949789	C30H28N0O19S0	30	28	0	19	0
325.108	6952177	C19H18N0O5S0	19	18	0	5	0
578.079	6959500	C24H21N1O16S0	24	21	1	16	0
437.218	6961149	C23H34N0O8S0	23	34	0	8	0
423.096	6964636	C16H24N0O11S1	16	24	0	11	1
343.061	6967778	C21H12N0O5S0	21	12	0	5	0
653.115	6983169	C31H26N0O16S0	31	26	0	16	0
555.187	6992151	C29H32N0O11S0	29	32	0	11	0
290.031	7002488	C13H9N1O7S0	13	9	1	7	0
572.069	7002555	C25H19N1O15S0	25	19	1	15	0
390.12	7003052	C19H21N1O8S0	19	21	1	8	0
366.997	7003374	C11H12N0O12S1	11	12	0	12	1
548.105	7006202	C24H23N1O14S0	24	23	1	14	0
506.131	7006298	C23H25N1O12S0	23	25	1	12	0
488.998	7010905	C17H14N0O15S1	17	14	0	15	1
395.114	7011389	C22H20N0O7S0	22	20	0	7	0
243.051	7013679	C10H12N0O7S0	10	12	0	7	0
505.12	7014709	C20H26N0O15S0	20	26	0	15	0
455.094	7018311	C18H20N2O12S0	18	20	2	12	0
597.125	7019051	C29H26N0O14S0	29	26	0	14	0
298.036	7019782	C15H9N1O6S0	15	9	1	6	0
637.142	7029353	C28H30N0O17S0	28	30	0	17	0
354.062	7039811	C18H13N1O7S0	18	13	1	7	0
293.082	7044610	C18H14N0O4S0	18	14	0	4	0
681.095	7045929	C28H26N0O20S0	28	26	0	20	0
493.11	7052211	C21H22N2O12S0	21	22	2	12	0
589.229	7055302	C30H38N0O12S0	30	38	0	12	0
538.12	7058771	C23H25N1O14S0	23	25	1	14	0
560.068	7059208	C24H19N1O15S0	24	19	1	15	0
412.068	7059920	C20H15N1O9S0	20	15	1	9	0
427.07	7059963	C18H20N0O10S1	18	20	0	10	1
514.12	7091840	C21H25N1O14S0	21	25	1	14	0
247.098	7094100	C14H16N0O4S0	14	16	0	4	0
307.049	7094837	C11H16N0O8S1	11	16	0	8	1
641.1	7095188	C26H26N0O19S0	26	26	0	19	0
675.084	7100843	C29H24N0O19S0	29	24	0	19	0
575.053	7103795	C21H20N0O19S0	21	20	0	19	0
307.057	7107453	C13H12N2O7S0	13	12	2	7	0
299.15	7108077	C15H24N0O6S0	15	24	0	6	0
617.1	7112132	C24H26N0O19S0	24	26	0	19	0
300.999	7113610	C14H6N0O8S0	14	6	0	8	0
605.224	7114674	C30H38N0O13S0	30	38	0	13	0
255.03	7121262	C14H8N0O5S0	14	8	0	5	0
396.13	7121289	C18H23N1O9S0	18	23	1	9	0
520.11	7122596	C23H23N1O13S0	23	23	1	13	0
673.141	7124083	C31H30N0O17S0	31	30	0	17	0
387.003	7134545	C14H12N0O11S1	14	12	0	11	1
384.036	7136418	C18H11N1O9S0	18	11	1	9	0
551.12	7137409	C28H24N0O12S0	28	24	0	12	0
421.026	7152556	C14H14N0O15S0	14	14	0	15	0
545.239	7157012	C29H38N0O10S0	29	38	0	10	0
304.994	7159138	C13H6N0O9S0	13	6	0	9	0
603.121	7160154	C24H28N0O18S0	24	28	0	18	0
349.072	7160420	C20H14N0O6S0	20	14	0	6	0
337.078	7163891	C12H18N0O11S0	12	18	0	11	0
510.126	7164193	C22H25N1O13S0	22	25	1	13	0
469.081	7167060	C20H22N0O11S1	20	22	0	11	1
377.067	7167654	C21H14N0O7S0	21	14	0	7	0
335.008	7181554	C11H12N0O10S1	11	12	0	10	1
358.093	7185644	C18H17N1O7S0	18	17	1	7	0
277.051	7187762	C17H10N0O4S0	17	10	0	4	0
343.013	7192090	C13H12N0O9S1	13	12	0	9	1
653.064	7193848	C26H22N0O20S0	26	22	0	20	0
496.053	7209113	C23H15N1O12S0	23	15	1	12	0
367.115	7212310	C16H20N2O8S0	16	20	2	8	0
410.999	7212551	C19H8N0O11S0	19	8	0	11	0
417.057	7213122	C18H14N2O10S0	18	14	2	10	0
540.041	7217027	C24H15N1O14S0	24	15	1	14	0
487.128	7217160	C21H28N0O11S1	21	28	0	11	1
521.073	7219685	C26H18N0O12S0	26	18	0	12	0
625.177	7224340	C28H34N0O16S0	28	34	0	16	0
547.255	7231473	C29H40N0O10S0	29	40	0	10	0
333.041	7233057	C19H10N0O6S0	19	10	0	6	0
264.999	7237771	C11H6N0O8S0	11	6	0	8	0
443.192	7256239	C21H32N0O10S0	21	32	0	10	0
453.013	7260621	C18H14N0O12S1	18	14	0	12	1
271.01	7261375	C10H8N0O9S0	10	8	0	9	0
283.098	7269684	C17H16N0O4S0	17	16	0	4	0
469.074	7270600	C18H18N2O13S0	18	18	2	13	0
430.993	7273879	C15H12N0O13S1	15	12	0	13	1
441.013	7277274	C17H14N0O12S1	17	14	0	12	1
343.049	7284304	C14H16N0O8S1	14	16	0	8	1
677.137	7289578	C30H30N0O18S0	30	30	0	18	0
609.037	7295564	C24H18N0O19S0	24	18	0	19	0
480.993	7301999	C15H14N0O16S1	15	14	0	16	1
567.114	7303047	C28H24N0O13S0	28	24	0	13	0
279.066	7312491	C17H12N0O4S0	17	12	0	4	0
316.083	7316302	C16H15N1O6S0	16	15	1	6	0
333.073	7321936	C15H14N2O7S0	15	14	2	7	0
689.1	7328483	C30H26N0O19S0	30	26	0	19	0
498.125	7333270	C21H25N1O13S0	21	25	1	13	0
449.047	7343409	C18H14N2O12S0	18	14	2	12	0
469.045	7348762	C19H18N0O12S1	19	18	0	12	1
467.036	7349477	C21H12N2O11S0	21	12	2	11	0
571.167	7350776	C25H32N0O15S0	25	32	0	15	0
415.07	7358781	C17H20N0O10S1	17	20	0	10	1
485.003	7359739	C18H14N0O14S1	18	14	0	14	1
629.137	7368349	C26H30N0O18S0	26	30	0	18	0
437.015	7380921	C21H10N0O11S0	21	10	0	11	0
239.092	7390191	C12H16N0O5S0	12	16	0	5	0
433.117	7391508	C18H26N0O10S1	18	26	0	10	1
319.061	7392426	C19H12N0O5S0	19	12	0	5	0
457.045	7396970	C18H18N0O12S1	18	18	0	12	1
453.213	7400728	C23H34N0O9S0	23	34	0	9	0
535.052	7412464	C26H16N0O13S0	26	16	0	13	0
485.076	7423061	C20H22N0O12S1	20	22	0	12	1
267.066	7424374	C16H12N0O4S0	16	12	0	4	0
289.051	7431050	C18H10N0O4S0	18	10	0	4	0
428.099	7435552	C21H19N1O9S0	21	19	1	9	0
235.061	7437727	C12H12N0O5S0	12	12	0	5	0
286.036	7444393	C14H9N1O6S0	14	9	1	6	0
623.162	7445861	C28H32N0O16S0	28	32	0	16	0
475.063	7452905	C20H16N2O12S0	20	16	2	12	0
471.096	7454820	C20H24N0O11S1	20	24	0	11	1
447.104	7457714	C20H20N2O10S0	20	20	2	10	0
487.234	7459205	C27H36N0O8S0	27	36	0	8	0
655.115	7459412	C27H28N0O19S0	27	28	0	19	0
456.115	7465699	C19H23N1O12S0	19	23	1	12	0
383.109	7480884	C16H20N2O9S0	16	20	2	9	0
460.125	7488224	C22H23N1O10S0	22	23	1	10	0
321.073	7490376	C14H14N2O7S0	14	14	2	7	0
437.047	7492076	C17H14N2O12S0	17	14	2	12	0
659.125	7495431	C30H28N0O17S0	30	28	0	17	0
697.069	7497768	C31H22N0O19S0	31	22	0	19	0
385.008	7498697	C11H14N0O13S1	11	14	0	13	1
475.146	7498854	C20H28N0O13S0	20	28	0	13	0
469.052	7504422	C21H14N2O11S0	21	14	2	11	0
639.048	7505007	C25H20N0O20S0	25	20	0	20	0
518.131	7505908	C24H25N1O12S0	24	25	1	12	0
589.068	7516086	C22H22N0O19S0	22	22	0	19	0
514.099	7517824	C24H21N1O12S0	24	21	1	12	0
399.003	7518597	C15H12N0O11S1	15	12	0	11	1
378.994	7539996	C15H8N0O12S0	15	8	0	12	0
389.145	7542930	C17H26N0O10S0	17	26	0	10	0
655.079	7543886	C26H24N0O20S0	26	24	0	20	0
292.994	7549903	C12H6N0O9S0	12	6	0	9	0
481.073	7553245	C19H18N2O13S0	19	18	2	13	0
601.193	7561474	C30H34N0O13S0	30	34	0	13	0
346.093	7565841	C17H17N1O7S0	17	17	1	7	0
393.025	7567449	C20H10N0O9S0	20	10	0	9	0
571.182	7570427	C29H32N0O12S0	29	32	0	12	0
411.047	7570505	C19H12N2O9S0	19	12	2	9	0
466.027	7576307	C18H13N1O14S0	18	13	1	14	0
439.042	7583339	C20H12N2O10S0	20	12	2	10	0
393.031	7588193	C13H14N0O14S0	13	14	0	14	0
523.015	7590712	C24H12N0O14S0	24	12	0	14	0
479.229	7593424	C25H36N0O9S0	25	36	0	9	0
401.197	7595007	C23H30N0O6S0	23	30	0	6	0
595.037	7606695	C27H16N0O16S0	27	16	0	16	0
273.004	7610178	C13H6N0O7S0	13	6	0	7	0
360.109	7610865	C18H19N1O7S0	18	19	1	7	0
548.068	7616249	C23H19N1O15S0	23	19	1	15	0
522.125	7620867	C23H25N1O13S0	23	25	1	13	0
475.099	7624992	C21H20N2O11S0	21	20	2	11	0
355.042	7627240	C13H12N2O10S0	13	12	2	10	0
347.117	7628167	C15H24N0O7S1	15	24	0	7	1
497.182	7631351	C27H30N0O9S0	27	30	0	9	0
384.072	7632083	C19H15N1O8S0	19	15	1	8	0
483.089	7633771	C19H20N2O13S0	19	20	2	13	0
363.003	7639397	C12H12N0O11S1	12	12	0	11	1
425.047	7639555	C16H14N2O12S0	16	14	2	12	0
276.051	7640380	C13H11N1O6S0	13	11	1	6	0
441.122	7646603	C20H26N0O9S1	20	26	0	9	1
416.099	7646701	C20H19N1O9S0	20	19	1	9	0
344.026	7652356	C12H11N1O11S0	12	11	1	11	0
247.025	7655485	C12H8N0O6S0	12	8	0	6	0
413.054	7659567	C17H18N0O10S1	17	18	0	10	1
388.089	7662726	C15H19N1O11S0	15	19	1	11	0
532.109	7663322	C24H23N1O13S0	24	23	1	13	0
491.094	7668744	C21H20N2O12S0	21	20	2	12	0
347.052	7669030	C15H12N2O8S0	15	12	2	8	0
337.104	7674139	C15H18N2O7S0	15	18	2	7	0
379.082	7677334	C21H16N0O7S0	21	16	0	7	0
512.048	7694739	C23H15N1O13S0	23	15	1	13	0
371.044	7695750	C15H16N0O9S1	15	16	0	9	1
621.183	7697610	C29H34N0O15S0	29	34	0	15	0
454.041	7700341	C21H13N1O11S0	21	13	1	11	0
290.067	7701901	C14H13N1O6S0	14	13	1	6	0
683.09	7706419	C31H24N0O18S0	31	24	0	18	0
399.047	7715520	C18H12N2O9S0	18	12	2	9	0
319.086	7715785	C13H20N0O7S1	13	20	0	7	1
323.092	7717180	C19H16N0O5S0	19	16	0	5	0
439.063	7717262	C17H16N2O12S0	17	16	2	12	0
671.125	7717670	C31H28N0O17S0	31	28	0	17	0
641.115	7719318	C30H26N0O16S0	30	26	0	16	0
414.083	7726799	C20H17N1O9S0	20	17	1	9	0
393.098	7737786	C22H18N0O7S0	22	18	0	7	0
448.016	7750286	C18H11N1O13S0	18	11	1	13	0
564.063	7755527	C23H19N1O16S0	23	19	1	16	0
354.119	7756696	C16H21N1O8S0	16	21	1	8	0
479.068	7757931	C17H20N0O16S0	17	20	0	16	0
485.218	7759111	C27H34N0O8S0	27	34	0	8	0
310.021	7766076	C12H9N1O9S0	12	9	1	9	0
460.073	7767435	C17H19N1O14S0	17	19	1	14	0
550.12	7768899	C24H25N1O14S0	24	25	1	14	0
490.027	7774130	C20H13N1O14S0	20	13	1	14	0
381.098	7783667	C21H18N0O7S0	21	18	0	7	0
485.112	7793283	C21H26N0O11S1	21	26	0	11	1
665.136	7796002	C29H30N0O18S0	29	30	0	18	0
396.021	7808247	C15H11N1O12S0	15	11	1	12	0
659.053	7813883	C28H20N0O19S0	28	20	0	19	0
433.052	7816493	C18H14N2O11S0	18	14	2	11	0
423.108	7821230	C23H20N0O8S0	23	20	0	8	0
653.136	7829764	C28H30N0O18S0	28	30	0	18	0
399.024	7833249	C12H16N0O13S1	12	16	0	13	1
261.113	7833966	C15H18N0O4S0	15	18	0	4	0
617.188	7846089	C30H34N0O14S0	30	34	0	14	0
459.133	7859955	C20H28N0O10S1	20	28	0	10	1
287.129	7860723	C17H20N0O4S0	17	20	0	4	0
259.098	7863981	C15H16N0O4S0	15	16	0	4	0
427.099	7864360	C17H20N2O11S0	17	20	2	11	0
587.126	7877349	C24H28N0O17S0	24	28	0	17	0
395.11	7877943	C17H20N2O9S0	17	20	2	9	0
615.12	7879002	C25H28N0O18S0	25	28	0	18	0
299.129	7879327	C18H20N0O4S0	18	20	0	4	0
358.02	7895554	C16H9N1O9S0	16	9	1	9	0
363.093	7896553	C14H20N0O11S0	14	20	0	11	0
350.015	7900125	C14H9N1O10S0	14	9	1	10	0
542.057	7910393	C24H17N1O14S0	24	17	1	14	0
617.151	7920070	C29H30N0O15S0	29	30	0	15	0
539.213	7926411	C26H36N0O12S0	26	36	0	12	0
414.997	7936215	C15H12N0O12S1	15	12	0	12	1
318.098	7940720	C16H17N1O6S0	16	17	1	6	0
496.037	7942797	C19H15N1O15S0	19	15	1	15	0
655.094	7944784	C30H24N0O17S0	30	24	0	17	0
482.131	7954037	C21H25N1O12S0	21	25	1	12	0
601.105	7954174	C24H26N0O18S0	24	26	0	18	0
430.099	7959595	C17H21N1O12S0	17	21	1	12	0
317.033	7961678	C12H14N0O8S1	12	14	0	8	1
294.098	7969616	C14H17N1O6S0	14	17	1	6	0
625.141	7976720	C27H30N0O17S0	27	30	0	17	0
454.078	7981490	C22H17N1O10S0	22	17	1	10	0
409.093	7988165	C22H18N0O8S0	22	18	0	8	0
495.224	7989497	C25H36N0O10S0	25	36	0	10	0
519.009	7998057	C18H16N0O16S1	18	16	0	16	1
321.046	7998373	C11H14N0O11S0	11	14	0	11	0
385.052	7998853	C14H14N2O11S0	14	14	2	11	0
370.114	8001626	C16H21N1O9S0	16	21	1	9	0
351.075	8007937	C13H20N0O9S1	13	20	0	9	1
267.03	8017569	C15H8N0O5S0	15	8	0	5	0
251.02	8018533	C11H8N0O7S0	11	8	0	7	0
379.115	8020419	C17H20N2O8S0	17	20	2	8	0
504.115	8035552	C23H23N1O12S0	23	23	1	12	0
507.063	8036414	C18H20N0O17S0	18	20	0	17	0
311.052	8039291	C12H12N2O8S0	12	12	2	8	0
291.066	8040708	C18H12N0O4S0	18	12	0	4	0
511.003	8043878	C16H16N0O17S1	16	16	0	17	1
611.105	8045730	C29H24N0O15S0	29	24	0	15	0
375.047	8060444	C16H12N2O9S0	16	12	2	9	0
328.104	8061643	C14H19N1O8S0	14	19	1	8	0
390.998	8064963	C13H12N0O12S1	13	12	0	12	1
281.082	8069070	C17H14N0O4S0	17	14	0	4	0
491.229	8069264	C26H36N0O9S0	26	36	0	9	0
557.203	8069936	C29H34N0O11S0	29	34	0	11	0
469.187	8070654	C26H30N0O8S0	26	30	0	8	0
383.008	8070697	C15H12N0O10S1	15	12	0	10	1
550.084	8072001	C23H21N1O15S0	23	21	1	15	0
388.104	8072347	C19H19N1O8S0	19	19	1	8	0
491.122	8075812	C20H28N0O12S1	20	28	0	12	1
428.026	8077744	C19H11N1O11S0	19	11	1	11	0
470.073	8080009	C22H17N1O11S0	22	17	1	11	0
507.009	8084018	C17H16N0O16S1	17	16	0	16	1
331.14	8086861	C15H24N0O8S0	15	24	0	8	0
268.046	8087206	C11H11N1O7S0	11	11	1	7	0
307.025	8088350	C17H8N0O6S0	17	8	0	6	0
445.089	8090825	C20H18N2O10S0	20	18	2	10	0
615.172	8102493	C30H32N0O14S0	30	32	0	14	0
497.145	8108764	C26H26N0O10S0	26	26	0	10	0
443.102	8114460	C19H24N0O10S1	19	24	0	10	1
393.067	8114834	C14H18N0O13S0	14	18	0	13	0
415.106	8117104	C18H24N0O9S1	18	24	0	9	1
309.073	8119409	C13H14N2O7S0	13	14	2	7	0
677.064	8120030	C28H22N0O20S0	28	22	0	20	0
511.161	8128623	C27H28N0O10S0	27	28	0	10	0
335.08	8131806	C13H20N0O8S1	13	20	0	8	1
562.084	8132734	C24H21N1O15S0	24	21	1	15	0
383.15	8136555	C22H24N0O6S0	22	24	0	6	0
573.016	8137095	C24H14N0O17S0	24	14	0	17	0
512.105	8137109	C21H23N1O14S0	21	23	1	14	0
441.192	8143612	C25H30N0O7S0	25	30	0	7	0
498.068	8148079	C23H17N1O12S0	23	17	1	12	0
375.003	8151390	C13H12N0O11S1	13	12	0	11	1
477.047	8154620	C24H14N0O11S0	24	14	0	11	0
533.115	8155603	C21H26N0O16S0	21	26	0	16	0
365.067	8158225	C20H14N0O7S0	20	14	0	7	0
279.03	8178894	C16H8N0O5S0	16	8	0	5	0
327.083	8180779	C13H16N2O8S0	13	16	2	8	0
457.081	8181287	C19H22N0O11S1	19	22	0	11	1
351.003	8185365	C11H12N0O11S1	11	12	0	11	1
484.088	8191096	C23H19N1O11S0	23	19	1	11	0
468.993	8193223	C14H14N0O16S1	14	14	0	16	1
399.181	8196724	C23H28N0O6S0	23	28	0	6	0
486.031	8196844	C21H13N1O13S0	21	13	1	13	0
526.063	8203581	C24H17N1O13S0	24	17	1	13	0
330.025	8203779	C15H9N1O8S0	15	9	1	8	0
270.062	8208320	C11H13N1O7S0	11	13	1	7	0
599.141	8213148	C29H28N0O14S0	29	28	0	14	0
475.128	8221643	C20H28N0O11S1	20	28	0	11	1
427.176	8222877	C24H28N0O7S0	24	28	0	7	0
257.082	8223342	C15H14N0O4S0	15	14	0	4	0
263.129	8224579	C15H20N0O4S0	15	20	0	4	0
346.021	8229285	C15H9N1O9S0	15	9	1	9	0
585.037	8232934	C22H18N0O19S0	22	18	0	19	0
333.01	8236916	C11H10N0O12S0	11	10	0	12	0
465.115	8237595	C20H22N2O11S0	20	22	2	11	0
367.119	8240028	C21H20N0O6S0	21	20	0	6	0
639.1	8245366	C30H24N0O16S0	30	24	0	16	0
331.061	8246747	C20H12N0O5S0	20	12	0	5	0
637.084	8248673	C30H22N0O16S0	30	22	0	16	0
349.036	8250925	C19H10N0O7S0	19	10	0	7	0
375.083	8259279	C17H16N2O8S0	17	16	2	8	0
391.046	8260612	C21H12N0O8S0	21	12	0	8	0
401.055	8267840	C16H18N0O10S1	16	18	0	10	1
499.003	8269789	C15H16N0O17S1	15	16	0	17	1
371.074	8278832	C14H16N2O10S0	14	16	2	10	0
400.031	8282341	C18H11N1O10S0	18	11	1	10	0
237.04	8283564	C11H10N0O6S0	11	10	0	6	0
611.162	8289956	C27H32N0O16S0	27	32	0	16	0
421.053	8296660	C17H14N2O11S0	17	14	2	11	0
445.117	8304119	C19H26N0O10S1	19	26	0	10	1
463.109	8312624	C18H24N0O14S0	18	24	0	14	0
437.12	8313184	C19H22N2O10S0	19	22	2	10	0
456.093	8317376	C22H19N1O10S0	22	19	1	10	0
375.112	8323063	C16H24N0O8S1	16	24	0	8	1
476.998	8323381	C16H14N0O15S1	16	14	0	15	1
371.008	8325202	C14H12N0O10S1	14	12	0	10	1
633.037	8328539	C26H18N0O19S0	26	18	0	19	0
441.079	8336965	C17H18N2O12S0	17	18	2	12	0
558.089	8338105	C25H21N1O14S0	25	21	1	14	0
317.07	8340091	C13H18N0O7S1	13	18	0	7	1
591.027	8350831	C24H16N0O18S0	24	16	0	18	0
345.065	8352531	C14H18N0O8S1	14	18	0	8	1
503.013	8357167	C18H16N0O15S1	18	16	0	15	1
367.009	8364287	C18H8N0O9S0	18	8	0	9	0
603.209	8374109	C30H36N0O13S0	30	36	0	13	0
269.082	8379482	C16H14N0O4S0	16	14	0	4	0
585.161	8396790	C29H30N0O13S0	29	30	0	13	0
449.021	8399110	C15H14N0O16S0	15	14	0	16	0
637.178	8405614	C29H34N0O16S0	29	34	0	16	0
673.069	8410727	C29H22N0O19S0	29	22	0	19	0
322.02	8415782	C13H9N1O9S0	13	9	1	9	0
521.079	8417252	C19H22N0O17S0	19	22	0	17	0
454.026	8424284	C17H13N1O14S0	17	13	1	14	0
302.031	8429012	C14H9N1O7S0	14	9	1	7	0
327.124	8432484	C19H20N0O5S0	19	20	0	5	0
385.096	8442560	C17H22N0O8S1	17	22	0	8	1
669.073	8445899	C30H22N0O18S0	30	22	0	18	0
515.229	8446014	C28H36N0O9S0	28	36	0	9	0
583.146	8453857	C29H28N0O13S0	29	28	0	13	0
385.023	8454494	C15H14N0O10S1	15	14	0	10	1
463.031	8474541	C23H12N0O11S0	23	12	0	11	0
439.1	8486088	C18H20N2O11S0	18	20	2	11	0
476.12	8495646	C22H23N1O11S0	22	23	1	11	0
374.037	8498192	C13H13N1O12S0	13	13	1	12	0
357.058	8520957	C13H14N2O10S0	13	14	2	10	0
625.084	8522251	C29H22N0O16S0	29	22	0	16	0
428.995	8524673	C15H10N0O15S0	15	10	0	15	0
629.064	8525717	C24H22N0O20S0	24	22	0	20	0
461.003	8528528	C16H14N0O14S1	16	14	0	14	1
556.073	8528781	C25H19N1O14S0	25	19	1	14	0
613.12	8529146	C29H26N0O15S0	29	26	0	15	0
543.005	8530077	C23H12N0O16S0	23	12	0	16	0
360.094	8539611	C14H19N1O10S0	14	19	1	10	0
241.035	8547784	C10H10N0O7S0	10	10	0	7	0
552.1	8548301	C23H23N1O15S0	23	23	1	15	0
651.157	8549306	C29H32N0O17S0	29	32	0	17	0
476.995	8550959	C19H10N0O15S0	19	10	0	15	0
304.083	8551760	C15H15N1O6S0	15	15	1	6	0
277.145	8555970	C16H22N0O4S0	16	22	0	4	0
449.12	8565929	C20H22N2O10S0	20	22	2	10	0
541.172	8576866	C28H30N0O11S0	28	30	0	11	0
673.105	8581741	C30H26N0O18S0	30	26	0	18	0
379.042	8593247	C15H12N2O10S0	15	12	2	10	0
259.082	8596909	C11H16N0O7S0	11	16	0	7	0
435.039	8597102	C19H16N0O10S1	19	16	0	10	1
331.049	8599881	C13H16N0O8S1	13	16	0	8	1
285.113	8601528	C17H18N0O4S0	17	18	0	4	0
333.065	8603461	C13H18N0O8S1	13	18	0	8	1
445.008	8615748	C16H14N0O13S1	16	14	0	13	1
481.11	8631823	C20H22N2O12S0	20	22	2	12	0
401.091	8636785	C17H22N0O9S1	17	22	0	9	1
529.193	8641775	C24H34N0O13S0	24	34	0	13	0
561.11	8649669	C22H26N0O17S0	22	26	0	17	0
257.103	8666621	C12H18N0O6S0	12	18	0	6	0
393.062	8691594	C21H14N0O8S0	21	14	0	8	0
447.068	8699767	C19H16N2O11S0	19	16	2	11	0
335.088	8726122	C15H16N2O7S0	15	16	2	7	0
645.11	8729071	C29H26N0O17S0	29	26	0	17	0
539.01	8733358	C24H12N0O15S0	24	12	0	15	0
508.109	8735247	C22H23N1O13S0	22	23	1	13	0
302.067	8735984	C15H13N1O6S0	15	13	1	6	0
639.121	8739449	C27H28N0O18S0	27	28	0	18	0
491.032	8745928	C17H16N0O17S0	17	16	0	17	0
479.095	8752145	C20H20N2O12S0	20	20	2	12	0
569.13	8754236	C28H26N0O13S0	28	26	0	13	0
405.028	8758054	C18H14N0O9S1	18	14	0	9	1
549.234	8764698	C28H38N0O11S0	28	38	0	11	0
377.197	8766044	C21H30N0O6S0	21	30	0	6	0
607.204	8781314	C29H36N0O14S0	29	36	0	14	0
328.046	8788217	C16H11N1O7S0	16	11	1	7	0
409.053	8792974	C16H14N2O11S0	16	14	2	11	0
407.11	8798767	C18H20N2O9S0	18	20	2	9	0
403.107	8799493	C17H24N0O9S1	17	24	0	9	1
653.1	8800510	C27H26N0O19S0	27	26	0	19	0
337.024	8801955	C11H14N0O10S1	11	14	0	10	1
367.042	8807982	C14H12N2O10S0	14	12	2	10	0
336.109	8808531	C16H19N1O7S0	16	19	1	7	0
440.062	8812760	C21H15N1O10S0	21	15	1	10	0
374.015	8819442	C16H9N1O10S0	16	9	1	10	0
427.063	8822768	C16H16N2O12S0	16	16	2	12	0
331.013	8835477	C12H12N0O9S1	12	12	0	9	1
390.994	8837567	C16H8N0O12S0	16	8	0	12	0
335.025	8845453	C11H12N0O12S0	11	12	0	12	0
439.034	8846431	C18H16N0O11S1	18	16	0	11	1
635.162	8846437	C29H32N0O16S0	29	32	0	16	0
546.089	8847355	C24H21N1O14S0	24	21	1	14	0
363.051	8862892	C20H12N0O7S0	20	12	0	7	0
300.036	8864276	C11H11N1O9S0	11	11	1	9	0
429.086	8869133	C18H22N0O10S1	18	22	0	10	1
619.167	8874560	C29H32N0O15S0	29	32	0	15	0
397.023	8880177	C16H14N0O10S1	16	14	0	10	1
601.157	8888576	C29H30N0O14S0	29	30	0	14	0
471.008	8890457	C14H16N0O16S1	14	16	0	16	1
498.032	8896598	C22H13N1O13S0	22	13	1	13	0
323.052	8899462	C13H12N2O8S0	13	12	2	8	0
461.112	8905541	C19H26N0O11S1	19	26	0	11	1
241.072	8910175	C11H14N0O6S0	11	14	0	6	0
435.036	8911722	C22H12N0O10S0	22	12	0	10	0
349.078	8912620	C13H18N0O11S0	13	18	0	11	0
245.045	8926119	C13H10N0O5S0	13	10	0	5	0
469.208	8932896	C23H34N0O10S0	23	34	0	10	0
439.14	8933897	C24H24N0O8S0	24	24	0	8	0
467.135	8934917	C25H24N0O9S0	25	24	0	9	0
431.207	8946149	C24H32N0O7S0	24	32	0	7	0
546.052	8956924	C23H17N1O15S0	23	17	1	15	0
551.084	8957567	C27H20N0O13S0	27	20	0	13	0
271.098	8973159	C16H16N0O4S0	16	16	0	4	0
484.037	8973622	C18H15N1O15S0	18	15	1	15	0
585.146	8973812	C25H30N0O16S0	25	30	0	16	0
419.109	8978374	C19H20N2O9S0	19	20	2	9	0
432.021	8982235	C18H11N1O12S0	18	11	1	12	0
527.192	8988176	C28H32N0O10S0	28	32	0	10	0
321.171	8992583	C18H26N0O5S0	18	26	0	5	0
448.125	8993346	C21H23N1O10S0	21	23	1	10	0
386.088	8994558	C19H17N1O8S0	19	17	1	8	0
464.998	8996699	C15H14N0O15S1	15	14	0	15	1
500.047	9029724	C22H15N1O13S0	22	15	1	13	0
419.101	9038011	C17H24N0O10S1	17	24	0	10	1
419.207	9053780	C23H32N0O7S0	23	32	0	7	0
373.096	9064929	C16H22N0O8S1	16	22	0	8	1
565.063	9066709	C27H18N0O14S0	27	18	0	14	0
667.08	9071732	C27H24N0O20S0	27	24	0	20	0
305.045	9074447	C18H10N0O5S0	18	10	0	5	0
283.025	9076100	C15H8N0O6S0	15	8	0	6	0
362.015	9079499	C15H9N1O10S0	15	9	1	10	0
341.14	9081256	C20H22N0O5S0	20	22	0	5	0
503.229	9081993	C27H36N0O9S0	27	36	0	9	0
385.166	9082910	C22H26N0O6S0	22	26	0	6	0
496.11	9083846	C21H23N1O13S0	21	23	1	13	0
292.083	9087942	C14H15N1O6S0	14	15	1	6	0
409.081	9092277	C15H22N0O11S1	15	22	0	11	1
502.099	9095320	C23H21N1O12S0	23	21	1	12	0
643.131	9095873	C30H28N0O16S0	30	28	0	16	0
324.109	9096346	C15H19N1O7S0	15	19	1	7	0
479.026	9099439	C23H12N0O12S0	23	12	0	12	0
589.193	9112002	C29H34N0O13S0	29	34	0	13	0
384.021	9114125	C14H11N1O12S0	14	11	1	12	0
595.204	9120178	C28H36N0O14S0	28	36	0	14	0
344.099	9130353	C14H19N1O9S0	14	19	1	9	0
385.089	9140406	C15H18N2O10S0	15	18	2	10	0
436.125	9143084	C20H23N1O10S0	20	23	1	10	0
369.029	9147469	C15H14N0O9S1	15	14	0	9	1
679.079	9164299	C28H24N0O20S0	28	24	0	20	0
356.041	9165480	C17H11N1O8S0	17	11	1	8	0
459.024	9166782	C17H16N0O13S1	17	16	0	13	1
443.065	9171424	C18H20N0O11S1	18	20	0	11	1
339.047	9185390	C13H12N2O9S0	13	12	2	9	0
335.044	9187368	C12H16N0O9S1	12	16	0	9	1
472.089	9191679	C22H19N1O11S0	22	19	1	11	0
363.047	9193126	C15H12N2O9S0	15	12	2	9	0
486.104	9196356	C23H21N1O11S0	23	21	1	11	0
371.171	9197882	C18H28N0O8S0	18	28	0	8	0
449.112	9211292	C18H26N0O11S1	18	26	0	11	1
459.096	9211319	C19H24N0O11S1	19	24	0	11	1
539.119	9212571	C27H24N0O12S0	27	24	0	12	0
509.109	9221548	C26H22N0O11S0	26	22	0	11	0
442.078	9225882	C21H17N1O10S0	21	17	1	10	0
479.099	9238039	C25H20N0O10S0	25	20	0	10	0
631.13	9246842	C29H28N0O16S0	29	28	0	16	0
579.078	9248582	C28H20N0O14S0	28	20	0	14	0
315.145	9265524	C15H24N0O7S0	15	24	0	7	0
519.005	9274218	C21H12N0O16S0	21	12	0	16	0
373.023	9281658	C14H14N0O10S1	14	14	0	10	1
319.049	9282971	C12H16N0O8S1	12	16	0	8	1
419.01	9284151	C14H12N0O15S0	14	12	0	15	0
323.02	9286746	C17H8N0O7S0	17	8	0	7	0
444.094	9289069	C21H19N1O10S0	21	19	1	10	0
538.084	9293146	C22H21N1O15S0	22	21	1	15	0
473.166	9293966	C21H30N0O12S0	21	30	0	12	0
526.084	9294135	C21H21N1O15S0	21	21	1	15	0
427.034	9300932	C17H16N0O11S1	17	16	0	11	1
446.109	9309265	C21H21N1O10S0	21	21	1	10	0
585.125	9327090	C28H26N0O14S0	28	26	0	14	0
537.104	9327137	C27H22N0O12S0	27	22	0	12	0
536.068	9338115	C22H19N1O15S0	22	19	1	15	0
286.057	9339062	C11H13N1O8S0	11	13	1	8	0
307.061	9342400	C18H12N0O5S0	18	12	0	5	0
357.029	9342803	C14H14N0O9S1	14	14	0	9	1
458.057	9363323	C17H17N1O14S0	17	17	1	14	0
524.068	9368379	C21H19N1O15S0	21	19	1	15	0
609.052	9372749	C28H18N0O16S0	28	18	0	16	0
306.098	9378112	C15H17N1O6S0	15	17	1	6	0
399.039	9382582	C16H16N0O10S1	16	16	0	10	1
302.052	9390308	C11H13N1O9S0	11	13	1	9	0
361.068	9402472	C16H14N2O8S0	16	14	2	8	0
613.069	9404664	C24H22N0O19S0	24	22	0	19	0
536.105	9408251	C23H23N1O14S0	23	23	1	14	0
544.073	9410638	C24H19N1O14S0	24	19	1	14	0
485	9412343	C21H10N0O14S0	21	10	0	14	0
412.125	9420064	C18H23N1O10S0	18	23	1	10	0
421.057	9434073	C22H14N0O9S0	22	14	0	9	0
347.056	9442220	C20H12N0O6S0	20	12	0	6	0
401.019	9444368	C15H14N0O11S1	15	14	0	11	1
470.036	9452111	C21H13N1O12S0	21	13	1	12	0
493.078	9466517	C25H18N0O11S0	25	18	0	11	0
671.089	9468191	C30H24N0O18S0	30	24	0	18	0
419.119	9468885	C17H24N0O12S0	17	24	0	12	0
569.021	9470500	C25H14N0O16S0	25	14	0	16	0
603.027	9470805	C25H16N0O18S0	25	16	0	18	0
481.114	9472276	C25H22N0O10S0	25	22	0	10	0
581.058	9473437	C27H18N0O15S0	27	18	0	15	0
337.072	9473771	C19H14N0O6S0	19	14	0	6	0
561.234	9479132	C29H38N0O11S0	29	38	0	11	0
389.063	9488035	C17H14N2O9S0	17	14	2	9	0
599.162	9506973	C26H32N0O16S0	26	32	0	16	0
347.008	9510372	C12H12N0O10S1	12	12	0	10	1
353.099	9513013	C15H18N2O8S0	15	18	2	8	0
403.079	9514207	C18H16N2O9S0	18	16	2	9	0
425.124	9521014	C23H22N0O8S0	23	22	0	8	0
416.047	9536164	C15H15N1O13S0	15	15	1	13	0
603.136	9546074	C28H28N0O15S0	28	28	0	15	0
627.084	9546697	C25H24N0O19S0	25	24	0	19	0
635.126	9552480	C28H28N0O17S0	28	28	0	17	0
581.188	9559475	C27H34N0O14S0	27	34	0	14	0
397.052	9562712	C15H14N2O11S0	15	14	2	11	0
667.116	9569402	C28H28N0O19S0	28	28	0	19	0
540.078	9570301	C25H19N1O13S0	25	19	1	13	0
323.088	9593911	C14H16N2O7S0	14	16	2	7	0
366.12	9594367	C17H21N1O8S0	17	21	1	8	0
499.04	9601012	C16H20N0O16S1	16	20	0	16	1
575.214	9603412	C29H36N0O12S0	29	36	0	12	0
406.114	9612262	C19H21N1O9S0	19	21	1	9	0
280.083	9613812	C13H15N1O6S0	13	15	1	6	0
365.03	9623517	C19H10N0O8S0	19	10	0	8	0
533.239	9644466	C28H38N0O10S0	28	38	0	10	0
530.058	9659139	C23H17N1O14S0	23	17	1	14	0
306.025	9661053	C13H9N1O8S0	13	9	1	8	0
555.151	9663507	C28H28N0O12S0	28	28	0	12	0
524.105	9665330	C22H23N1O14S0	22	23	1	14	0
411.145	9667281	C23H24N0O7S0	23	24	0	7	0
429.049	9670613	C17H18N0O11S1	17	18	0	11	1
581.094	9675939	C28H22N0O14S0	28	22	0	14	0
595.074	9686953	C28H20N0O15S0	28	20	0	15	0
591.209	9687679	C29H36N0O13S0	29	36	0	13	0
385.06	9697679	C16H18N0O9S1	16	18	0	9	1
325.166	9702464	C17H26N0O6S0	17	26	0	6	0
472.074	9704679	C18H19N1O14S0	18	19	1	14	0
489.07	9735593	C19H22N0O13S1	19	22	0	13	1
615.135	9736539	C29H28N0O15S0	29	28	0	15	0
557.167	9751338	C28H30N0O12S0	28	30	0	12	0
549.016	9756690	C22H14N0O17S0	22	14	0	17	0
349.068	9762397	C15H14N2O8S0	15	14	2	8	0
429.192	9765296	C24H30N0O7S0	24	30	0	7	0
337.036	9769269	C18H10N0O7S0	18	10	0	7	0
687.085	9770514	C30H24N0O19S0	30	24	0	19	0
633.147	9781609	C29H30N0O16S0	29	30	0	16	0
321.041	9787933	C18H10N0O6S0	18	10	0	6	0
278.067	9793802	C13H13N1O6S0	13	13	1	6	0
273.113	9794742	C16H18N0O4S0	16	18	0	4	0
471.06	9798060	C19H20N0O12S1	19	20	0	12	1
373.06	9807534	C15H18N0O9S1	15	18	0	9	1
440.998	9814466	C13H14N0O15S1	13	14	0	15	1
433.008	9820648	C15H14N0O13S1	15	14	0	13	1
330.062	9829047	C16H13N1O7S0	16	13	1	7	0
465.107	9832206	C18H26N0O12S1	18	26	0	12	1
413.084	9835608	C16H18N2O11S0	16	18	2	11	0
335.062	9838402	C12H16N0O11S0	12	16	0	11	0
381.192	9839859	C20H30N0O7S0	20	30	0	7	0
370.057	9852168	C18H13N1O8S0	18	13	1	8	0
573.198	9864109	C29H34N0O12S0	29	34	0	12	0
599.032	9868950	C26H16N0O17S0	26	16	0	17	0
597.182	9869359	C27H34N0O15S0	27	34	0	15	0
393.086	9880746	C15H22N0O10S1	15	22	0	10	1
455.029	9882586	C18H16N0O12S1	18	16	0	12	1
485.039	9890088	C19H18N0O13S1	19	18	0	13	1
399.068	9894877	C15H16N2O11S0	15	16	2	11	0
489.034	9904513	C18H18N0O14S1	18	18	0	14	1
425.018	9910231	C17H14N0O11S1	17	14	0	11	1
609.183	9913426	C28H34N0O15S0	28	34	0	15	0
435.105	9915606	C19H20N2O10S0	19	20	2	10	0
335.052	9919412	C14H12N2O8S0	14	12	2	8	0
468.042	9920966	C18H15N1O14S0	18	15	1	14	0
416.026	9926534	C18H11N1O11S0	18	11	1	11	0
449.051	9932343	C23H14N0O10S0	23	14	0	10	0
589.105	9937849	C23H26N0O18S0	23	26	0	18	0
437.088	9946157	C23H18N0O9S0	23	18	0	9	0
445.044	9954944	C17H18N0O12S1	17	18	0	12	1
431.101	9960512	C18H24N0O10S1	18	24	0	10	1
333.029	9963023	C12H14N0O9S1	12	14	0	9	1
603.173	9970012	C29H32N0O14S0	29	32	0	14	0
569.188	9973321	C26H34N0O14S0	26	34	0	14	0
489.016	9986668	C17H14N0O17S0	17	14	0	17	0
353.063	9990271	C14H14N2O9S0	14	14	2	9	0
453.078	9993017	C18H18N2O12S0	18	18	2	12	0
593.187	10006305	C28H34N0O14S0	28	34	0	14	0
325.068	10009018	C13H14N2O8S0	13	14	2	8	0
499.197	10017368	C27H32N0O9S0	27	32	0	9	0
459.06	10019322	C18H20N0O12S1	18	20	0	12	1
431.065	10029064	C17H20N0O11S1	17	20	0	11	1
587.053	10045661	C22H20N0O19S0	22	20	0	19	0
433.089	10053223	C19H18N2O10S0	19	18	2	10	0
443.014	10060940	C13H16N0O15S1	13	16	0	15	1
369.058	10083191	C14H14N2O10S0	14	14	2	10	0
531.005	10086913	C22H12N0O16S0	22	12	0	16	0
605.188	10094001	C29H34N0O14S0	29	34	0	14	0
335.056	10099002	C19H12N0O6S0	19	12	0	6	0
459.005	10099360	C16H12N0O16S0	16	12	0	16	0
387.076	10102835	C16H20N0O9S1	16	20	0	9	1
389	10112079	C13H10N0O14S0	13	10	0	14	0
253.108	10121064	C13H18N0O5S0	13	18	0	5	0
463.099	10129951	C20H20N2O11S0	20	20	2	11	0
449.084	10134381	C19H18N2O11S0	19	18	2	11	0
414.994	10141650	C18H8N0O12S0	18	8	0	12	0
369.094	10150059	C15H18N2O9S0	15	18	2	9	0
611.032	10152095	C27H16N0O17S0	27	16	0	17	0
259.025	10163283	C13H8N0O6S0	13	8	0	6	0
507.006	10169393	C20H12N0O16S0	20	12	0	16	0
411.104	10177177	C17H20N2O10S0	17	20	2	10	0
561.016	10186164	C23H14N0O17S0	23	14	0	17	0
484.11	10192019	C20H23N1O13S0	20	23	1	13	0
403.071	10197716	C16H20N0O10S1	16	20	0	10	1
597.037	10208806	C23H18N0O19S0	23	18	0	19	0
453.119	10215292	C24H22N0O9S0	24	22	0	9	0
326.999	10216501	C12H8N0O11S0	12	8	0	11	0
623.053	10217820	C25H20N0O19S0	25	20	0	19	0
316.067	10225596	C12H15N1O9S0	12	15	1	9	0
516.115	10236144	C24H23N1O12S0	24	23	1	12	0
386.109	10237467	C16H21N1O10S0	16	21	1	10	0
348.109	10243275	C17H19N1O7S0	17	19	1	7	0
355.176	10256814	C18H28N0O7S0	18	28	0	7	0
361.005	10264588	C12H10N0O13S0	12	10	0	13	0
405.094	10267519	C18H18N2O9S0	18	18	2	9	0
314.088	10281766	C13H17N1O8S0	13	17	1	8	0
528.079	10305311	C24H19N1O13S0	24	19	1	13	0
522.053	10309908	C21H17N1O15S0	21	17	1	15	0
461.084	10312470	C20H18N2O11S0	20	18	2	11	0
510.053	10321690	C20H17N1O15S0	20	17	1	15	0
449.218	10322763	C24H34N0O8S0	24	34	0	8	0
541.193	10325855	C25H34N0O13S0	25	34	0	13	0
474.032	10328773	C20H13N1O13S0	20	13	1	13	0
298.093	10329452	C13H17N1O7S0	13	17	1	7	0
417.013	10329859	C15H14N0O12S1	15	14	0	12	1
341.063	10331573	C13H14N2O9S0	13	14	2	9	0
661.069	10342490	C28H22N0O19S0	28	22	0	19	0
347.088	10343900	C16H16N2O7S0	16	16	2	7	0
567.208	10351772	C27H36N0O13S0	27	36	0	13	0
601.068	10353916	C23H22N0O19S0	23	22	0	19	0
500.083	10359410	C23H19N1O12S0	23	19	1	12	0
367.034	10369827	C12H16N0O11S1	12	16	0	11	1
330.083	10386646	C13H17N1O9S0	13	17	1	9	0
471.187	10386804	C22H32N0O11S0	22	32	0	11	0
533.042	10390501	C19H18N0O18S0	19	18	0	18	0
677.1	10393316	C29H26N0O19S0	29	26	0	19	0
513.019	10397084	C16H18N0O17S1	16	18	0	17	1
474.104	10397237	C22H21N1O11S0	22	21	1	11	0
309.077	10403061	C18H14N0O5S0	18	14	0	5	0
400.067	10406165	C19H15N1O9S0	19	15	1	9	0
537.031	10417200	C25H14N0O14S0	25	14	0	14	0
627.12	10425037	C26H28N0O18S0	26	28	0	18	0
575.089	10429755	C22H24N0O18S0	22	24	0	18	0
543.172	10433679	C24H32N0O14S0	24	32	0	14	0
402.994	10438254	C17H8N0O12S0	17	8	0	12	0
409.008	10441297	C13H14N0O13S1	13	14	0	13	1
391.107	10444373	C16H24N0O9S1	16	24	0	9	1
383.004	10445732	C18H8N0O10S0	18	8	0	10	0
366.994	10456298	C14H8N0O12S0	14	8	0	12	0
[truncated: 1,786 more rows]

## Sheet: SRNOM-(+)ESI
m/z	intensity	formula	C	H	N	O	S
215.052	2850038	C7H12N0O6S0	7	12	0	6	0
283.094	3078660	C15H16N0O4S0	15	16	0	4	0
287.037	3143592	C9H12N0O9S0	9	12	0	9	0
237.037	3167827	C9H10N0O6S0	9	10	0	6	0
235.094	3205591	C11H16N0O4S0	11	16	0	4	0
233.063	3206114	C7H14N0O7S0	7	14	0	7	0
265.032	3219639	C10H10N0O7S0	10	10	0	7	0
287.074	3244476	C10H16N0O8S0	10	16	0	8	0
243.047	3260802	C8H12N0O7S0	8	12	0	7	0
233.042	3277916	C10H10N0O5S0	10	10	0	5	0
293.209	3285253	C16H30N0O3S0	16	30	0	3	0
319.021	3316987	C16H8N0O6S0	16	8	0	6	0
329.042	3324931	C18H10N0O5S0	18	10	0	5	0
291.105	3351228	C10H20N0O8S0	10	20	0	8	0
257.063	3357808	C9H14N0O7S0	9	14	0	7	0
235.058	3370150	C10H12N0O5S0	10	12	0	5	0
305.042	3380442	C16H10N0O5S0	16	10	0	5	0
253.105	3385626	C11H18N0O5S0	11	18	0	5	0
297.146	3390753	C17H22N0O3S0	17	22	0	3	0
281.042	3420259	C14H10N0O5S0	14	10	0	5	0
335.183	3466436	C17H28N0O5S0	17	28	0	5	0
293.079	3469230	C16H14N0O4S0	16	14	0	4	0
315.063	3484915	C18H12N0O4S0	18	12	0	4	0
325.177	3504284	C19H26N0O3S0	19	26	0	3	0
255.047	3509469	C9H12N0O7S0	9	12	0	7	0
269.027	3524546	C9H10N0O8S0	9	10	0	8	0
245.078	3528951	C12H14N0O4S0	12	14	0	4	0
305.084	5982722	C10H18N0O9S0	10	18	0	9	0
271.094	3540096	C14H16N0O4S0	14	16	0	4	0
267.157	3559745	C13H24N0O4S0	13	24	0	4	0
301.089	3561414	C11H18N0O8S0	11	18	0	8	0
271.042	3577964	C9H12N0O8S0	9	12	0	8	0
283.057	3586035	C14H12N0O5S0	14	12	0	5	0
289.032	3629552	C12H10N0O7S0	12	10	0	7	0
307.094	3635115	C17H16N0O4S0	17	16	0	4	0
349.017	3654961	C13H10N0O10S0	13	10	0	10	0
343.027	3696975	C11H12N0O11S0	11	12	0	11	0
357.074	3736460	C20H14N0O5S0	20	14	0	5	0
301.053	5426086	C10H14N0O9S0	10	14	0	9	0
345.037	3777284	C18H10N0O6S0	18	10	0	6	0
271.079	3778682	C10H16N0O7S0	10	16	0	7	0
249.037	3786970	C10H10N0O6S0	10	10	0	6	0
299.037	4656899	C10H12N0O9S0	10	12	0	9	0
297.022	3893953	C10H10N0O9S0	10	10	0	9	0
411.214	3865027	C23H32N0O5S0	23	32	0	5	0
331.058	3873363	C18H12N0O5S0	18	12	0	5	0
375.011	3883470	C18H8N0O8S0	18	8	0	8	0
319.224	3889134	C18H32N0O3S0	18	32	0	3	0
531.054	3890739	C25H16N0O12S0	25	16	0	12	0
485.048	3892346	C24H14N0O10S0	24	14	0	10	0
329.079	3893298	C19H14N0O4S0	19	14	0	4	0
319.1	11511641	C11H20N0O9S0	11	20	0	9	0
337.141	3900945	C19H22N0O4S0	19	22	0	4	0
319.188	3902402	C17H28N0O4S0	17	28	0	4	0
429.137	3903358	C17H26N0O11S0	17	26	0	11	0
447.235	3905839	C23H36N0O7S0	23	36	0	7	0
317.084	3907084	C11H18N0O9S0	11	18	0	9	0
373.11	3917971	C14H22N0O10S0	14	22	0	10	0
429.261	3918811	C24H38N0O5S0	24	38	0	5	0
513.158	3924655	C21H30N0O13S0	21	30	0	13	0
453.225	3926291	C25H34N0O6S0	25	34	0	6	0
549.246	3931812	C30H38N0O8S0	30	38	0	8	0
531.038	3938346	C21H16N0O15S0	21	16	0	15	0
417.225	3943539	C22H34N0O6S0	22	34	0	6	0
583.127	3943608	C23H28N0O16S0	23	28	0	16	0
595.142	3955003	C28H28N0O13S0	28	28	0	13	0
593.22	3956404	C27H38N0O13S0	27	38	0	13	0
609.158	3961778	C29H30N0O13S0	29	30	0	13	0
447.178	3971340	C25H28N0O6S0	25	28	0	6	0
357.204	3973177	C20H30N0O4S0	20	30	0	4	0
409.199	3973760	C23H30N0O5S0	23	30	0	5	0
563.246	3974693	C27H40N0O11S0	27	40	0	11	0
401.027	3975506	C20H10N0O8S0	20	10	0	8	0
317.042	3975642	C17H10N0O5S0	17	10	0	5	0
253.032	3981803	C9H10N0O7S0	9	10	0	7	0
321.11	3983317	C18H18N0O4S0	18	18	0	4	0
551.21	3983599	C25H36N0O12S0	25	36	0	12	0
317.078	3990020	C18H14N0O4S0	18	14	0	4	0
501.246	4000782	C26H38N0O8S0	26	38	0	8	0
439.115	4001007	C25H20N0O6S0	25	20	0	6	0
361.11	4004201	C13H22N0O10S0	13	22	0	10	0
359.095	4008966	C13H20N0O10S0	13	20	0	10	0
365.266	4009365	C20H38N0O4S0	20	38	0	4	0
326.063	3319554	C15H13N1O6S0	15	13	1	6	0
591.096	4013024	C24H24N0O16S0	24	24	0	16	0
483.105	4014826	C26H20N0O8S0	26	20	0	8	0
455.074	4015924	C24H16N0O8S0	24	16	0	8	0
501.049	4016049	C17H18N0O16S0	17	18	0	16	0
445.059	4016108	C15H18N0O14S0	15	18	0	14	0
627.132	4022243	C28H28N0O15S0	28	28	0	15	0
322.126	3418548	C14H21N1O6S0	14	21	1	6	0
261.037	4028297	C11H10N0O6S0	11	10	0	6	0
459.017	4028357	C18H12N0O13S0	18	12	0	13	0
325.017	4030928	C11H10N0O10S0	11	10	0	10	0
465.225	4041899	C26H34N0O6S0	26	34	0	6	0
523.033	4052180	C19H16N0O16S0	19	16	0	16	0
649.081	4060702	C29H22N0O16S0	29	22	0	16	0
290.063	3573063	C12H13N1O6S0	12	13	1	6	0
344.038	3598001	C14H11N1O8S0	14	11	1	8	0
315.069	5652729	C11H16N0O9S0	11	16	0	9	0
611.121	4063850	C24H28N0O17S0	24	28	0	17	0
483.017	4065985	C20H12N0O13S0	20	12	0	13	0
537.049	4070787	C20H18N0O16S0	20	18	0	16	0
415.152	4071545	C24H24N0O5S0	24	24	0	5	0
543.132	4080922	C21H28N0O15S0	21	28	0	15	0
467.24	4081848	C26H36N0O6S0	26	36	0	6	0
571.09	4084499	C21H24N0O17S0	21	24	0	17	0
323.125	4084875	C18H20N0O4S0	18	20	0	4	0
419.079	4093069	C14H20N0O13S0	14	20	0	13	0
587.065	4097116	C24H20N0O16S0	24	20	0	16	0
283.115	4097550	C12H20N0O6S0	12	20	0	6	0
527.044	4100974	C22H16N0O14S0	22	16	0	14	0
539.261	4106101	C29H40N0O8S0	29	40	0	8	0
575.153	4108333	C29H28N0O11S0	29	28	0	11	0
593.127	4110997	C28H26N0O13S0	28	26	0	13	0
313.053	14636070	C11H14N0O9S0	11	14	0	9	0
573.137	4112566	C29H26N0O11S0	29	26	0	11	0
659.195	4115046	C30H36N0O15S0	30	36	0	15	0
519.199	4119250	C28H32N0O8S0	28	32	0	8	0
345.073	4122678	C19H14N0O5S0	19	14	0	5	0
359.126	4131887	C21H20N0O4S0	21	20	0	4	0
633.142	4132787	C27H30N0O16S0	27	30	0	16	0
577.226	4140444	C27H38N0O12S0	27	38	0	12	0
683.195	4141569	C32H36N0O15S0	32	36	0	15	0
259.094	4143543	C13H16N0O4S0	13	16	0	4	0
311.037	18727831	C11H12N0O9S0	11	12	0	9	0
393.167	4160209	C22H26N0O5S0	22	26	0	5	0
591.059	4165587	C23H20N0O17S0	23	20	0	17	0
386.121	3647951	C18H21N1O7S0	18	21	1	7	0
384.054	3676775	C13H15N1O11S0	13	15	1	11	0
387.157	4166264	C23H24N0O4S0	23	24	0	4	0
563.116	4169187	C27H24N0O12S0	27	24	0	12	0
281.027	4169308	C10H10N0O8S0	10	10	0	8	0
607.106	4176105	C28H24N0O14S0	28	24	0	14	0
615.205	4176456	C29H36N0O13S0	29	36	0	13	0
307.224	4182573	C17H32N0O3S0	17	32	0	3	0
247.094	4184265	C12H16N0O4S0	12	16	0	4	0
332.038	3682146	C13H11N1O8S0	13	11	1	8	0
312.069	3736048	C11H15N1O8S0	11	15	1	8	0
439.079	4184279	C24H16N0O7S0	24	16	0	7	0
441.173	4187707	C19H30N0O10S0	19	30	0	10	0
321.167	4198683	C16H26N0O5S0	16	26	0	5	0
647.194	4201758	C29H36N0O15S0	29	36	0	15	0
513.049	4205176	C18H18N0O16S0	18	18	0	16	0
615.096	4205599	C26H24N0O16S0	26	24	0	16	0
587.189	4206217	C31H32N0O10S0	31	32	0	10	0
380.074	3757040	C18H15N1O7S0	18	15	1	7	0
308.038	3803743	C11H11N1O8S0	11	11	1	8	0
475.209	4207665	C27H32N0O6S0	27	32	0	6	0
561.173	4208121	C29H30N0O10S0	29	30	0	10	0
499.063	4213256	C25H16N0O10S0	25	16	0	10	0
267.12	4226610	C12H20N0O5S0	12	20	0	5	0
417.167	4251714	C24H26N0O5S0	24	26	0	5	0
543.038	4252388	C22H16N0O15S0	22	16	0	15	0
617.112	4256549	C26H26N0O16S0	26	26	0	16	0
497.199	4256926	C22H34N0O11S0	22	34	0	11	0
368.038	3839875	C16H11N1O8S0	16	11	1	8	0
310.053	3844482	C11H13N1O8S0	11	13	1	8	0
291.157	4261596	C15H24N0O4S0	15	24	0	4	0
295.094	4264100	C16H16N0O4S0	16	16	0	4	0
367.188	4266818	C21H28N0O4S0	21	28	0	4	0
605.127	4268613	C29H26N0O13S0	29	26	0	13	0
571.033	4271865	C23H16N0O16S0	23	16	0	16	0
583.252	4276455	C30H40N0O10S0	30	40	0	10	0
285.073	4278203	C14H14N0O5S0	14	14	0	5	0
370.126	3864038	C18H21N1O6S0	18	21	1	6	0
549.231	4280475	C26H38N0O11S0	26	38	0	11	0
393.137	4285616	C14H26N0O11S0	14	26	0	11	0
277.141	4291056	C14H22N0O4S0	14	22	0	4	0
385.105	4291380	C22H18N0O5S0	22	18	0	5	0
555.059	4292410	C20H20N0O17S0	20	20	0	17	0
487.064	4293161	C24H16N0O10S0	24	16	0	10	0
309.022	5747535	C11H10N0O9S0	11	10	0	9	0
549.048	4296757	C21H18N0O16S0	21	18	0	16	0
491.022	4297053	C22H12N0O12S0	22	12	0	12	0
487.027	4305432	C23H12N0O11S0	23	12	0	11	0
559.251	4311048	C28H40N0O10S0	28	40	0	10	0
333.116	12297465	C12H22N0O9S0	12	22	0	9	0
388.137	3881689	C18H23N1O7S0	18	23	1	7	0
273.094	4333210	C10H18N0O7S0	10	18	0	7	0
593.075	4334723	C23H22N0O17S0	23	22	0	17	0
571.069	4346122	C24H20N0O15S0	24	20	0	15	0
609.194	4357055	C30H34N0O12S0	30	34	0	12	0
219.026	4360795	C9H8N0O5S0	9	8	0	5	0
629.184	4362176	C29H34N0O14S0	29	34	0	14	0
489.225	4363800	C28H34N0O6S0	28	34	0	6	0
383.089	4364280	C22H16N0O5S0	22	16	0	5	0
357.11	4381628	C21H18N0O4S0	21	18	0	4	0
458.069	3886525	C19H17N1O11S0	19	17	1	11	0
328.079	3896097	C15H15N1O6S0	15	15	1	6	0
429.225	4385215	C23H34N0O6S0	23	34	0	6	0
347.016	4386959	C17H8N0O7S0	17	8	0	7	0
569.054	4389208	C24H18N0O15S0	24	18	0	15	0
573.267	4392177	C29H42N0O10S0	29	42	0	10	0
579.205	4392644	C26H36N0O13S0	26	36	0	13	0
533.214	4399354	C29H34N0O8S0	29	34	0	8	0
635.158	4410372	C27H32N0O16S0	27	32	0	16	0
643.127	4412085	C28H28N0O16S0	28	28	0	16	0
331.1	4764299	C12H20N0O9S0	12	20	0	9	0
449.214	4415966	C22H34N0O8S0	22	34	0	8	0
462.064	3919408	C18H17N1O12S0	18	17	1	12	0
505.038	4416285	C23H14N0O12S0	23	14	0	12	0
501.085	4417474	C18H22N0O15S0	18	22	0	15	0
431.08	4419347	C15H20N0O13S0	15	20	0	13	0
321.069	4998308	C12H14N2O7S0	12	14	2	7	0
411.084	4432204	C23H16N0O6S0	23	16	0	6	0
345.043	4434444	C11H14N0O11S0	11	14	0	11	0
595.164	4436290	C25H32N0O15S0	25	32	0	15	0
407.204	4437286	C20H32N0O7S0	20	32	0	7	0
359.053	4441551	C19H12N0O6S0	19	12	0	6	0
306.058	3927982	C12H13N1O7S0	12	13	1	7	0
340.064	4233610	C12H15N1O9S0	12	15	1	9	0
396.069	3953430	C18H15N1O8S0	18	15	1	8	0
605.2	4450398	C31H34N0O11S0	31	34	0	11	0
363.157	4454112	C21H24N0O4S0	21	24	0	4	0
473.011	4454400	C22H10N0O11S0	22	10	0	11	0
615.241	4457558	C30H40N0O12S0	30	40	0	12	0
329.084	5533754	C12H18N0O9S0	12	18	0	9	0
633.179	4463558	C28H34N0O15S0	28	34	0	15	0
327.069	17489417	C12H16N0O9S0	12	16	0	9	0
325.053	39924734	C12H14N0O9S0	12	14	0	9	0
482.09	3965708	C18H21N1O13S0	18	21	1	13	0
581.112	4480437	C23H26N0O16S0	23	26	0	16	0
389.069	4483836	C13H18N0O12S0	13	18	0	12	0
323.037	24554013	C12H12N0O9S0	12	12	0	9	0
297.037	4501197	C14H10N0O6S0	14	10	0	6	0
443.147	4501812	C25H24N0O6S0	25	24	0	6	0
617.148	4503347	C27H30N0O15S0	27	30	0	15	0
299.11	4507966	C12H20N0O7S0	12	20	0	7	0
555.168	4508021	C23H32N0O14S0	23	32	0	14	0
377.142	4511499	C14H26N0O10S0	14	26	0	10	0
294.095	3970145	C12H17N1O6S0	12	17	1	6	0
563.189	4512264	C29H32N0O10S0	29	32	0	10	0
605.221	4515429	C28H38N0O13S0	28	38	0	13	0
633.216	4520922	C29H38N0O14S0	29	38	0	14	0
469.126	4525172	C26H22N0O7S0	26	22	0	7	0
321.022	5907562	C12H10N0O9S0	12	10	0	9	0
497.251	4529334	C27H38N0O7S0	27	38	0	7	0
561.049	4536760	C22H18N0O16S0	22	18	0	16	0
450.137	3998724	C19H25N1O10S0	19	25	1	10	0
507.038	4545251	C19H16N0O15S0	19	16	0	15	0
401.012	4552002	C16H10N0O11S0	16	10	0	11	0
293.027	4560779	C11H10N0O8S0	11	10	0	8	0
369.152	4561169	C16H26N0O8S0	16	26	0	8	0
329.074	3402541	C14H14N2O6S0	14	14	2	6	0
347.131	4415276	C13H24N0O9S0	13	24	0	9	0
583.091	4569259	C22H24N0O17S0	22	24	0	17	0
401.105	4574626	C15H22N0O11S0	15	22	0	11	0
331.064	4576347	C11H16N0O10S0	11	16	0	10	0
611.21	4583049	C30H36N0O12S0	30	36	0	12	0
338.048	6399707	C12H13N1O9S0	12	13	1	9	0
354.08	6449129	C13H17N1O9S0	13	17	1	9	0
509.033	4585647	C22H14N0O13S0	22	14	0	13	0
401.033	4586839	C13H14N0O13S0	13	14	0	13	0
261.094	4592037	C9H18N0O7S0	9	18	0	7	0
533.142	4592849	C27H26N0O10S0	27	26	0	10	0
331.09	4334206	C14H16N2O6S0	14	16	2	6	0
247.079	4595388	C8H16N0O7S0	8	16	0	7	0
527.261	4596710	C28H40N0O8S0	28	40	0	8	0
581.184	4600273	C25H34N0O14S0	25	34	0	14	0
653.148	4604215	C30H30N0O15S0	30	30	0	15	0
406.054	4018901	C19H13N1O8S0	19	13	1	8	0
414.043	4032941	C17H13N1O10S0	17	13	1	10	0
400.137	4061121	C19H23N1O7S0	19	23	1	7	0
297.073	4610792	C15H14N0O5S0	15	14	0	5	0
333.11	4613873	C19H18N0O4S0	19	18	0	4	0
585.106	4615064	C22H26N0O17S0	22	26	0	17	0
333.07	4191931	C13H14N2O7S0	13	14	2	7	0
345.116	4293744	C13H22N0O9S0	13	22	0	9	0
347.095	4627066	C12H20N0O10S0	12	20	0	10	0
333.106	4367083	C14H18N2O6S0	14	18	2	6	0
571.158	4639027	C30H28N0O10S0	30	28	0	10	0
309.11	4639146	C17H18N0O4S0	17	18	0	4	0
507.235	4640066	C28H36N0O7S0	28	36	0	7	0
335.016	4649188	C16H8N0O7S0	16	8	0	7	0
352.064	8464720	C13H15N1O9S0	13	15	1	9	0
398.085	4083053	C18H17N1O8S0	18	17	1	8	0
607.2	4654346	C27H36N0O14S0	27	36	0	14	0
343.1	6479282	C13H20N0O9S0	13	20	0	9	0
249.11	4657426	C12H18N0O4S0	12	18	0	4	0
377.069	4665266	C12H18N0O12S0	12	18	0	12	0
501.079	4665279	C25H18N0O10S0	25	18	0	10	0
685.21	4665332	C32H38N0O15S0	32	38	0	15	0
231.084	4668103	C8H16N0O6S0	8	16	0	6	0
413.136	4684424	C24H22N0O5S0	24	22	0	5	0
399.214	4701704	C22H32N0O5S0	22	32	0	5	0
421.198	4709726	C24H30N0O5S0	24	30	0	5	0
354.058	4091340	C16H13N1O7S0	16	13	1	7	0
346.126	4096466	C16H21N1O6S0	16	21	1	6	0
341.084	25380599	C13H18N0O9S0	13	18	0	9	0
393.1	4738183	C13H22N0O12S0	13	22	0	12	0
589.225	4740440	C28H38N0O12S0	28	38	0	12	0
359.058	4752855	C12H16N0O11S0	12	16	0	11	0
561.064	4753856	C26H18N0O13S0	26	18	0	13	0
613.189	4757848	C29H34N0O13S0	29	34	0	13	0
561.137	4761062	C28H26N0O11S0	28	26	0	11	0
339.069	65055810	C13H16N0O9S0	13	16	0	9	0
350.048	7530153	C13H13N1O9S0	13	13	1	9	0
368.059	4131742	C13H15N1O10S0	13	15	1	10	0
471.235	4771987	C25H36N0O7S0	25	36	0	7	0
337.053	60866970	C13H14N0O9S0	13	14	0	9	0
415.121	4795742	C16H24N0O11S0	16	24	0	11	0
413.063	4801095	C22H14N0O7S0	22	14	0	7	0
373.032	4809265	C19H10N0O7S0	19	10	0	7	0
533.069	4810919	C25H18N0O12S0	25	18	0	12	0
603.184	4814774	C31H32N0O11S0	31	32	0	11	0
347.125	4817188	C20H20N0O4S0	20	20	0	4	0
455.24	4819858	C25H36N0O6S0	25	36	0	6	0
346.053	4136303	C14H13N1O8S0	14	13	1	8	0
465.028	4822597	C17H14N0O14S0	17	14	0	14	0
583.105	4831408	C26H24N0O14S0	26	24	0	14	0
609.143	4836268	C25H30N0O16S0	25	30	0	16	0
409.183	4846706	C19H30N0O8S0	19	30	0	8	0
565.226	4854284	C26H38N0O12S0	26	38	0	12	0
379.188	4861380	C22H28N0O4S0	22	28	0	4	0
403.209	4863467	C21H32N0O6S0	21	32	0	6	0
291.063	4874402	C16H12N0O4S0	16	12	0	4	0
540.111	4140123	C24H23N1O12S0	24	23	1	12	0
329.172	4876460	C18H26N0O4S0	18	26	0	4	0
503.204	4888496	C28H32N0O7S0	28	32	0	7	0
593.09	4890248	C27H22N0O14S0	27	22	0	14	0
335.037	26543873	C13H12N0O9S0	13	12	0	9	0
377.194	4929611	C19H30N0O6S0	19	30	0	6	0
351.157	4938374	C20H24N0O4S0	20	24	0	4	0
297.11	4951301	C16H18N0O4S0	16	18	0	4	0
609.085	4967320	C27H22N0O15S0	27	22	0	15	0
506.09	4148504	C20H21N1O13S0	20	21	1	13	0
306.095	4178385	C13H17N1O6S0	13	17	1	6	0
384.106	4182692	C18H19N1O7S0	18	19	1	7	0
241.068	4982434	C9H14N0O6S0	9	14	0	6	0
579.147	4992685	C28H28N0O12S0	28	28	0	12	0
441.028	5010908	C15H14N0O14S0	15	14	0	14	0
345.11	5014632	C20H18N0O4S0	20	18	0	4	0
345.069	3873328	C14H14N2O7S0	14	14	2	7	0
547.085	5017569	C26H20N0O12S0	26	20	0	12	0
433.162	5017838	C24H26N0O6S0	24	26	0	6	0
471.038	5028913	C16H16N0O15S0	16	16	0	15	0
345.106	3947618	C15H18N2O6S0	15	18	2	6	0
333.022	7781500	C13H10N0O9S0	13	10	0	9	0
475.23	5045308	C24H36N0O8S0	24	36	0	8	0
305.079	5058556	C17H14N0O4S0	17	14	0	4	0
399.048	5075291	C21H12N0O7S0	21	12	0	7	0
416.059	4204684	C17H15N1O10S0	17	15	1	10	0
368.095	4391885	C14H19N1O9S0	14	19	1	9	0
470.069	4234829	C20H17N1O11S0	20	17	1	11	0
279.157	5078325	C14H24N0O4S0	14	24	0	4	0
561.101	5091795	C27H22N0O12S0	27	22	0	12	0
661.152	5093913	C32H30N0O14S0	32	30	0	14	0
563.079	5116368	C26H20N0O13S0	26	20	0	13	0
347.085	6645485	C14H16N2O7S0	14	16	2	7	0
645.215	5125116	C30H38N0O14S0	30	38	0	14	0
631.163	5131171	C28H32N0O15S0	28	32	0	15	0
607.127	5146864	C25H28N0O16S0	25	28	0	16	0
427.115	5152653	C24H20N0O6S0	24	20	0	6	0
349.141	5153242	C20H22N0O4S0	20	22	0	4	0
617.221	5156688	C29H38N0O13S0	29	38	0	13	0
505.183	5161827	C27H30N0O8S0	27	30	0	8	0
426.064	4239465	C15H17N1O12S0	15	17	1	12	0
488.116	4256788	C21H23N1O11S0	21	23	1	11	0
545.142	5161875	C28H26N0O10S0	28	26	0	10	0
613.08	5168432	C26H22N0O16S0	26	22	0	16	0
405.167	5169016	C23H26N0O5S0	23	26	0	5	0
319.094	5179218	C18H16N0O4S0	18	16	0	4	0
423.017	5180182	C15H12N0O13S0	15	12	0	13	0
621.216	5183904	C28H38N0O14S0	28	38	0	14	0
427.079	5191538	C23H16N0O7S0	23	16	0	7	0
451.209	5213822	C25H32N0O6S0	25	32	0	6	0
567.132	5224889	C23H28N0O15S0	23	28	0	15	0
533.106	5231804	C26H22N0O11S0	26	22	0	11	0
247.058	5251243	C11H12N0O5S0	11	12	0	5	0
504.075	4259152	C20H19N1O13S0	20	19	1	13	0
470.106	4265568	C21H21N1O10S0	21	21	1	10	0
448.121	4300107	C19H23N1O10S0	19	23	1	10	0
515.168	5252265	C28H28N0O8S0	28	28	0	8	0
299.162	5252457	C17H24N0O3S0	17	24	0	3	0
567.111	5256623	C26H24N0O13S0	26	24	0	13	0
503.168	5262239	C27H28N0O8S0	27	28	0	8	0
431.147	5273412	C24H24N0O6S0	24	24	0	6	0
255.084	5281011	C10H16N0O6S0	10	16	0	6	0
351.116	3631183	C14H20N2O7S0	14	20	2	7	0
441.007	5283279	C18H10N0O12S0	18	10	0	12	0
579.075	5296784	C26H20N0O14S0	26	20	0	14	0
513.246	5299931	C27H38N0O8S0	27	38	0	8	0
444.054	4300148	C18H15N1O11S0	18	15	1	11	0
304.043	4314154	C12H11N1O7S0	12	11	1	7	0
461.048	5300241	C22H14N0O10S0	22	14	0	10	0
563.064	5307848	C22H20N0O16S0	22	20	0	16	0
507.054	5311210	C23H16N0O12S0	23	16	0	12	0
471.141	5323876	C26H24N0O7S0	26	24	0	7	0
353.096	4136126	C13H18N2O8S0	13	18	2	8	0
357.116	6656964	C14H22N0O9S0	14	22	0	9	0
553.059	5352688	C24H18N0O14S0	24	18	0	14	0
489.188	5352967	C27H30N0O7S0	27	30	0	7	0
657.216	5363891	C31H38N0O14S0	31	38	0	14	0
523.048	5369564	C23H16N0O13S0	23	16	0	13	0
366.08	8804784	C14H17N1O9S0	14	17	1	9	0
364.064	11159421	C14H15N1O9S0	14	15	1	9	0
417.064	5370346	C14H18N0O13S0	14	18	0	13	0
419.022	5378653	C16H12N0O12S0	16	12	0	12	0
443.074	5378822	C23H16N0O8S0	23	16	0	8	0
549.064	5395518	C25H18N0O13S0	25	18	0	13	0
567.169	5397963	C24H32N0O14S0	24	32	0	14	0
373.038	5400632	C12H14N0O12S0	12	14	0	12	0
389.027	5405388	C19H10N0O8S0	19	10	0	8	0
559.121	5414339	C28H24N0O11S0	28	24	0	11	0
355.1	30589249	C14H20N0O9S0	14	20	0	9	0
491.204	5417394	C27H32N0O7S0	27	32	0	7	0
353.084	94664367	C14H18N0O9S0	14	18	0	9	0
585.085	5439376	C25H22N0O15S0	25	22	0	15	0
503.043	5441379	C20H16N0O14S0	20	16	0	14	0
547.158	5466122	C28H28N0O10S0	28	28	0	10	0
487.173	5466716	C27H28N0O7S0	27	28	0	7	0
645.179	5472229	C29H34N0O15S0	29	34	0	15	0
589.08	5473573	C24H22N0O16S0	24	22	0	16	0
351.069	108473359	C14H16N0O9S0	14	16	0	9	0
531.199	5475461	C29H32N0O8S0	29	32	0	8	0
579.184	5478076	C29H32N0O11S0	29	32	0	11	0
362.048	4321591	C14H13N1O9S0	14	13	1	9	0
500.116	4358648	C22H23N1O11S0	22	23	1	11	0
597.121	5479377	C27H26N0O14S0	27	26	0	14	0
471.017	5479462	C19H12N0O13S0	19	12	0	13	0
477.027	5480352	C18H14N0O14S0	18	14	0	14	0
277.032	5483971	C11H10N0O7S0	11	10	0	7	0
359.085	4771321	C15H16N2O7S0	15	16	2	7	0
311.016	5484416	C14H8N0O7S0	14	8	0	7	0
493.22	5484892	C27H34N0O7S0	27	34	0	7	0
373.199	5485313	C20H30N0O5S0	20	30	0	5	0
427.157	5504941	C18H28N0O10S0	18	28	0	10	0
441.131	5508128	C25H22N0O6S0	25	22	0	6	0
525.246	5518220	C28H38N0O8S0	28	38	0	8	0
374.121	4364670	C17H21N1O7S0	17	21	1	7	0
412.1	4372199	C19H19N1O8S0	19	19	1	8	0
519.038	5524094	C20H16N0O15S0	20	16	0	15	0
313.032	5525007	C14H10N0O7S0	14	10	0	7	0
441.095	5528072	C24H18N0O7S0	24	18	0	7	0
361.064	4254764	C14H14N2O8S0	14	14	2	8	0
473.09	5532711	C17H22N0O14S0	17	22	0	14	0
349.053	56639842	C14H14N0O9S0	14	14	0	9	0
597.085	5550020	C26H22N0O15S0	26	22	0	15	0
361.101	6243420	C15H18N2O7S0	15	18	2	7	0
513.152	5582508	C28H26N0O8S0	28	26	0	8	0
619.163	5584467	C27H32N0O15S0	27	32	0	15	0
593.184	5594792	C26H34N0O14S0	26	34	0	14	0
457.162	5616583	C26H26N0O6S0	26	26	0	6	0
460.121	4380189	C20H23N1O10S0	20	23	1	10	0
428.132	4384398	C20H23N1O8S0	20	23	1	8	0
382.111	4006003	C15H21N1O9S0	15	21	1	9	0
495.272	5627161	C28H40N0O6S0	28	40	0	6	0
521.215	5648129	C28H34N0O8S0	28	34	0	8	0
331.094	5650051	C19H16N0O4S0	19	16	0	4	0
347.037	19961516	C14H12N0O9S0	14	12	0	9	0
363.08	6396540	C14H16N2O8S0	14	16	2	8	0
547.121	5660662	C27H24N0O11S0	27	24	0	11	0
393.188	5660904	C19H30N0O7S0	19	30	0	7	0
525.049	5664544	C19H18N0O16S0	19	18	0	16	0
363.116	3880363	C15H20N2O7S0	15	20	2	7	0
307.058	5664647	C16H12N0O5S0	16	12	0	5	0
613.117	5667134	C27H26N0O15S0	27	26	0	15	0
485.163	5669552	C20H30N0O12S0	20	30	0	12	0
473.048	5671954	C23H14N0O10S0	23	14	0	10	0
565.205	5674498	C29H34N0O10S0	29	34	0	10	0
366.116	4425183	C15H21N1O8S0	15	21	1	8	0
458.105	4435409	C20H21N1O10S0	20	21	1	10	0
375.09	5694000	C13H20N0O11S0	13	20	0	11	0
557.075	5703038	C20H22N0O17S0	20	22	0	17	0
399.084	5708161	C22H16N0O6S0	22	16	0	6	0
603.241	5712841	C29H40N0O12S0	29	40	0	12	0
365.095	3895992	C14H18N2O8S0	14	18	2	8	0
625.19	5724258	C30H34N0O13S0	30	34	0	13	0
511.179	5734098	C22H32N0O12S0	22	32	0	12	0
517.183	5747381	C28H30N0O8S0	28	30	0	8	0
345.022	6353903	C14H10N0O9S0	14	10	0	9	0
501.152	5752802	C27H26N0O8S0	27	26	0	8	0
589.116	5758258	C25H26N0O15S0	25	26	0	15	0
456.163	4436634	C22H27N1O8S0	22	27	1	8	0
480.075	4448593	C18H19N1O13S0	18	19	1	13	0
380.095	12666378	C15H19N1O9S0	15	19	1	9	0
437.012	5759846	C19H10N0O11S0	19	10	0	11	0
555.132	5760354	C22H28N0O15S0	22	28	0	15	0
305.027	5761483	C12H10N0O8S0	12	10	0	8	0
337.162	5765677	C16H26N0O6S0	16	26	0	6	0
483.235	5772071	C26H36N0O7S0	26	36	0	7	0
467.022	5779528	C20H12N0O12S0	20	12	0	12	0
371.022	5786196	C12H12N0O12S0	12	12	0	12	0
399.121	5791143	C23H20N0O5S0	23	20	0	5	0
581.163	5791177	C28H30N0O12S0	28	30	0	12	0
493.038	5795079	C22H14N0O12S0	22	14	0	12	0
342.058	4472870	C15H13N1O7S0	15	13	1	7	0
494.09	4477682	C19H21N1O13S0	19	21	1	13	0
370.074	4506533	C13H17N1O10S0	13	17	1	10	0
621.179	5795216	C27H34N0O15S0	27	34	0	15	0
345.079	5801022	C12H18N0O10S0	12	18	0	10	0
599.101	5801571	C26H24N0O15S0	26	24	0	15	0
415.042	5804314	C21H12N0O8S0	21	12	0	8	0
343.006	3538738	C14H8N0O9S0	14	8	0	9	0
273.11	5806496	C14H18N0O4S0	14	18	0	4	0
371.131	7510750	C15H24N0O9S0	15	24	0	9	0
323.016	5814787	C15H8N0O7S0	15	8	0	7	0
593.111	5814927	C24H26N0O16S0	24	26	0	16	0
476.08	4527576	C19H19N1O12S0	19	19	1	12	0
440.08	4539246	C16H19N1O12S0	16	19	1	12	0
500.153	4546057	C23H27N1O10S0	23	27	1	10	0
585.231	5829573	C29H38N0O11S0	29	38	0	11	0
369.116	29452515	C15H22N0O9S0	15	22	0	9	0
361.032	5830657	C18H10N0O7S0	18	10	0	7	0
569.075	5840226	C21H22N0O17S0	21	22	0	17	0
371.085	4240547	C16H16N2O7S0	16	16	2	7	0
431.043	5851897	C14H16N0O14S0	14	16	0	14	0
409.017	5855190	C18H10N0O10S0	18	10	0	10	0
261.11	5859757	C13H18N0O4S0	13	18	0	4	0
609.122	5872549	C28H26N0O14S0	28	26	0	14	0
613.226	5875046	C30H38N0O12S0	30	38	0	12	0
500.08	4555751	C21H19N1O12S0	21	19	1	12	0
404.059	4565303	C16H15N1O10S0	16	15	1	10	0
311.125	5890549	C17H20N0O4S0	17	20	0	4	0
363.011	5892642	C17H8N0O8S0	17	8	0	8	0
367.1	106987217	C15H20N0O9S0	15	20	0	9	0
549.173	5899899	C28H30N0O10S0	28	30	0	10	0
583.215	5905626	C29H36N0O11S0	29	36	0	11	0
365.084	136721577	C15H18N0O9S0	15	18	0	9	0
363.069	85682797	C15H16N0O9S0	15	16	0	9	0
373.101	4079750	C16H18N2O7S0	16	18	2	7	0
509.199	5909249	C23H34N0O11S0	23	34	0	11	0
521.142	5911258	C26H26N0O10S0	26	26	0	10	0
499.136	5922859	C27H24N0O8S0	27	24	0	8	0
361.017	5926893	C14H10N0O10S0	14	10	0	10	0
373.017	5932061	C15H10N0O10S0	15	10	0	10	0
384.09	4573330	C14H19N1O10S0	14	19	1	10	0
396.054	4586246	C14H15N1O11S0	14	15	1	11	0
392.132	4588638	C17H23N1O8S0	17	23	1	8	0
537.194	5932502	C24H34N0O12S0	24	34	0	12	0
619.2	5933666	C28H36N0O14S0	28	36	0	14	0
643.2	5963492	C30H36N0O14S0	30	36	0	14	0
413.1	5980776	C23H18N0O6S0	23	18	0	6	0
375.08	6715939	C15H16N2O8S0	15	16	2	8	0
361.053	42672157	C15H14N0O9S0	15	14	0	9	0
539.043	5990904	C23H16N0O14S0	23	16	0	14	0
403.152	5991858	C23H24N0O5S0	23	24	0	5	0
375.116	5220944	C16H20N2O7S0	16	20	2	7	0
541.116	5992090	C21H26N0O15S0	21	26	0	15	0
581.236	5993957	C30H38N0O10S0	30	38	0	10	0
467.189	6001821	C21H32N0O10S0	21	32	0	10	0
416.132	4615371	C19H23N1O8S0	19	23	1	8	0
472.121	4638282	C21H23N1O10S0	21	23	1	10	0
541.08	6011525	C20H22N0O16S0	20	22	0	16	0
427.042	6013782	C22H12N0O8S0	22	12	0	8	0
377.059	5014439	C14H14N2O9S0	14	14	2	9	0
493.204	6020437	C23H34N0O10S0	23	34	0	10	0
489.043	6021572	C23H14N0O11S0	23	14	0	11	0
557.054	6027635	C23H18N0O15S0	23	18	0	15	0
377.096	3998163	C15H18N2O8S0	15	18	2	8	0
581.148	6029763	C24H30N0O15S0	24	30	0	15	0
449.193	6029777	C25H30N0O6S0	25	30	0	6	0
611.101	6036066	C27H24N0O15S0	27	24	0	15	0
485.121	6052508	C26H22N0O8S0	26	22	0	8	0
411.017	6055695	C14H12N0O13S0	14	12	0	13	0
285.11	6070221	C15H18N0O4S0	15	18	0	4	0
327.157	6086266	C18H24N0O4S0	18	24	0	4	0
462.137	4650582	C20H25N1O10S0	20	25	1	10	0
438.116	4673106	C21H21N1O8S0	21	21	1	8	0
486.101	4717671	C21H21N1O11S0	21	21	1	11	0
509.251	6098714	C28H38N0O7S0	28	38	0	7	0
237.073	6127296	C10H14N0O5S0	10	14	0	5	0
325.141	6129774	C18H22N0O4S0	18	22	0	4	0
555.096	6133070	C21H24N0O16S0	21	24	0	16	0
379.075	4914491	C14H16N2O9S0	14	16	2	9	0
315.157	6146397	C17H24N0O4S0	17	24	0	4	0
595.106	6151471	C27H24N0O14S0	27	24	0	14	0
273.073	6155154	C13H14N0O5S0	13	14	0	5	0
379.111	4373351	C15H20N2O8S0	15	20	2	8	0
565.189	6156794	C25H34N0O13S0	25	34	0	13	0
359.037	16217531	C15H12N0O9S0	15	12	0	9	0
595.215	6204756	C30H36N0O11S0	30	36	0	11	0
295.058	6206218	C15H12N0O5S0	15	12	0	5	0
357.022	10766151	C15H10N0O9S0	15	10	0	9	0
389.136	6220615	C22H22N0O5S0	22	22	0	5	0
483.038	6221515	C17H16N0O15S0	17	16	0	15	0
350.121	4719372	C15H21N1O7S0	15	21	1	7	0
408.054	4721741	C15H15N1O11S0	15	15	1	11	0
442.075	4765828	C19H17N1O10S0	19	17	1	10	0
421.017	6227146	C19H10N0O10S0	19	10	0	10	0
355.006	4729539	C15H8N0O9S0	15	8	0	9	0
551.08	6230182	C25H20N0O13S0	25	20	0	13	0
513.122	6234781	C20H26N0O14S0	20	26	0	14	0
381.09	3780275	C14H18N2O9S0	14	18	2	9	0
353.157	6240017	C16H26N0O7S0	16	26	0	7	0
581.199	6254039	C29H34N0O11S0	29	34	0	11	0
335.125	6255991	C19H20N0O4S0	19	20	0	4	0
285.058	6260147	C10H14N0O8S0	10	14	0	8	0
525.064	6264617	C23H18N0O13S0	23	18	0	13	0
428.059	4768344	C18H15N1O10S0	18	15	1	10	0
418.147	4786048	C19H25N1O8S0	19	25	1	8	0
311.089	6270926	C16H16N0O5S0	16	16	0	5	0
457.09	6278047	C24H18N0O8S0	24	18	0	8	0
475.064	6283243	C23H16N0O10S0	23	16	0	10	0
595.091	6318378	C23H24N0O17S0	23	24	0	17	0
519.09	6328985	C25H20N0O11S0	25	20	0	11	0
535.158	6332748	C27H28N0O10S0	27	28	0	10	0
299.053	6344463	C14H12N0O6S0	14	12	0	6	0
385.017	6345677	C16H10N0O10S0	16	10	0	10	0
383.131	21089322	C16H24N0O9S0	16	24	0	9	0
523.23	6374207	C28H36N0O8S0	28	36	0	8	0
384.069	4820089	C17H15N1O8S0	17	15	1	8	0
466.059	4828762	C17H17N1O13S0	17	17	1	13	0
386.085	4856741	C17H17N1O8S0	17	17	1	8	0
466.095	4857453	C18H21N1O12S0	18	21	1	12	0
605.111	6376000	C25H26N0O16S0	25	26	0	16	0
333.037	6382736	C17H10N0O6S0	17	10	0	6	0
529.059	6413265	C22H18N0O14S0	22	18	0	14	0
299.125	6426443	C16H20N0O4S0	16	20	0	4	0
387.09	6428203	C14H20N0O11S0	14	20	0	11	0
563.152	6442485	C28H28N0O11S0	28	28	0	11	0
419.183	6446819	C24H28N0O5S0	24	28	0	5	0
423.199	6451111	C20H32N0O8S0	20	32	0	8	0
477.043	6451112	C22H14N0O11S0	22	14	0	11	0
429.058	6458692	C22H14N0O8S0	22	14	0	8	0
426.101	4857989	C16H21N1O11S0	16	21	1	11	0
310.09	4861865	C12H17N1O7S0	12	17	1	7	0
480.111	4928355	C19H23N1O12S0	19	23	1	12	0
579.132	6463143	C24H28N0O15S0	24	28	0	15	0
381.116	91718353	C16H22N0O9S0	16	22	0	9	0
239.052	6480117	C9H12N0O6S0	9	12	0	6	0
309.204	6482955	C16H30N0O4S0	16	30	0	4	0
387.08	5166624	C16H16N2O8S0	16	16	2	8	0
611.174	6537852	C29H32N0O13S0	29	32	0	13	0
301.032	6559636	C13H10N0O7S0	13	10	0	7	0
595.178	6562119	C29H32N0O12S0	29	32	0	12	0
341.172	6567791	C19H26N0O4S0	19	26	0	4	0
591.132	6570988	C25H28N0O15S0	25	28	0	15	0
401.136	6575553	C23H22N0O5S0	23	22	0	5	0
503.058	6588266	C24H16N0O11S0	24	16	0	11	0
344.11	4982036	C16H19N1O6S0	16	19	1	6	0
436.048	5070033	C16H15N1O12S0	16	15	1	12	0
330.095	5145954	C15H17N1O6S0	15	17	1	6	0
379.1	157153625	C16H20N0O9S0	16	20	0	9	0
469.168	6602889	C20H30N0O11S0	20	30	0	11	0
519.22	6603485	C25H36N0O10S0	25	36	0	10	0
457.126	6605747	C25H22N0O7S0	25	22	0	7	0
377.084	132722629	C16H18N0O9S0	16	18	0	9	0
389.096	4696858	C16H18N2O8S0	16	18	2	8	0
431.022	6618858	C17H12N0O12S0	17	12	0	12	0
565.095	6627787	C26H22N0O13S0	26	22	0	13	0
389.132	3693379	C17H22N2O7S0	17	22	2	7	0
515.101	6649479	C19H24N0O15S0	19	24	0	15	0
429.1	6652259	C16H22N0O12S0	16	22	0	12	0
293.136	6655956	C14H22N0O5S0	14	22	0	5	0
362.121	5210518	C16H21N1O7S0	16	21	1	7	0
466.132	5249664	C19H25N1O11S0	19	25	1	11	0
375.069	68126229	C16H16N0O9S0	16	16	0	9	0
339.011	6668277	C15H8N0O8S0	15	8	0	8	0
263.052	6684738	C11H12N0O6S0	11	12	0	6	0
391.075	4807624	C15H16N2O9S0	15	16	2	9	0
503.095	6686588	C25H20N0O10S0	25	20	0	10	0
595.127	6687030	C24H28N0O16S0	24	28	0	16	0
391.111	4220913	C16H20N2O8S0	16	20	2	8	0
317.027	6687176	C13H10N0O8S0	13	10	0	8	0
519.126	6694572	C26H24N0O10S0	26	24	0	10	0
373.053	35904587	C16H14N0O9S0	16	14	0	9	0
539.173	6701634	C23H32N0O13S0	23	32	0	13	0
344.074	5266146	C15H15N1O7S0	15	15	1	7	0
378.043	5268055	C14H13N1O10S0	14	13	1	10	0
370.053	5297547	C16H13N1O8S0	16	13	1	8	0
565.132	6709725	C27H26N0O12S0	27	26	0	12	0
251.053	6732968	C10H12N0O6S0	10	12	0	6	0
487.07	6742572	C17H20N0O15S0	17	20	0	15	0
395.183	6749535	C22H28N0O5S0	22	28	0	5	0
393.09	4387965	C15H18N2O9S0	15	18	2	9	0
383.022	6754217	C13H12N0O12S0	13	12	0	12	0
459.235	6768700	C24H36N0O7S0	24	36	0	7	0
475.173	6779936	C26H28N0O7S0	26	28	0	7	0
487.136	6779979	C26H24N0O8S0	26	24	0	8	0
451.027	6782483	C20H12N0O11S0	20	12	0	11	0
607.091	6787300	C24H24N0O17S0	24	24	0	17	0
601.08	6787318	C25H22N0O16S0	25	22	0	16	0
535.215	6798700	C25H36N0O11S0	25	36	0	11	0
539.08	6814221	C24H20N0O13S0	24	20	0	13	0
352.1	5303169	C14H19N1O8S0	14	19	1	8	0
378.08	11312260	C15H17N1O9S0	15	17	1	9	0
407.022	6865016	C15H12N0O12S0	15	12	0	12	0
435.178	6877815	C24H28N0O6S0	24	28	0	6	0
303.157	6925560	C16H24N0O4S0	16	24	0	4	0
533.054	6952095	C21H18N0O15S0	21	18	0	15	0
551.116	7048378	C26H24N0O12S0	26	24	0	12	0
279.12	7054118	C13H20N0O5S0	13	20	0	5	0
529.111	7054318	C27H22N0O10S0	27	22	0	10	0
549.1	7096402	C26H22N0O12S0	26	22	0	12	0
457.132	7097270	C18H26N0O12S0	18	26	0	12	0
387.121	7102030	C22H20N0O5S0	22	20	0	5	0
476.117	5362153	C20H23N1O11S0	20	23	1	11	0
414.116	5365229	C19H21N1O8S0	19	21	1	8	0
400.1	5422492	C18H19N1O8S0	18	19	1	8	0
443.022	7105253	C18H12N0O12S0	18	12	0	12	0
419.204	7123701	C21H32N0O7S0	21	32	0	7	0
521.069	7127731	C24H18N0O12S0	24	18	0	12	0
531.126	7130204	C27H24N0O10S0	27	24	0	10	0
617.184	7141185	C28H34N0O14S0	28	34	0	14	0
535.085	7158050	C25H20N0O12S0	25	20	0	12	0
577.08	7184223	C23H22N0O16S0	23	22	0	16	0
491.058	7207278	C23H16N0O11S0	23	16	0	11	0
371.037	21459559	C16H12N0O9S0	16	12	0	9	0
581.09	7218605	C26H22N0O14S0	26	22	0	14	0
376.064	9694945	C15H15N1O9S0	15	15	1	9	0
318.095	5483694	C14H17N1O6S0	14	17	1	6	0
579.096	7228056	C23H24N0O16S0	23	24	0	16	0
613.153	7235915	C28H30N0O14S0	28	30	0	14	0
601.116	7239938	C26H26N0O15S0	26	26	0	15	0
413.142	7240333	C17H26N0O10S0	17	26	0	10	0
539.064	7250436	C20H20N0O16S0	20	20	0	16	0
355.136	7251313	C15H24N0O8S0	15	24	0	8	0
397.199	7255495	C22H30N0O5S0	22	30	0	5	0
585.122	7261085	C26H26N0O14S0	26	26	0	14	0
495.235	7263496	C27H36N0O7S0	27	36	0	7	0
373.074	7289957	C13H18N0O11S0	13	18	0	11	0
321.037	7291004	C16H10N0O6S0	16	10	0	6	0
607.163	7293181	C26H32N0O15S0	26	32	0	15	0
517.111	7297680	C26H22N0O10S0	26	22	0	10	0
452.116	5527697	C18H23N1O11S0	18	23	1	11	0
492.111	5539672	C20H23N1O12S0	20	23	1	12	0
446.069	5572193	C18H17N1O11S0	18	17	1	11	0
455.022	7324439	C19H12N0O12S0	19	12	0	12	0
363.12	7333553	C20H20N0O5S0	20	20	0	5	0
583.142	7350462	C27H28N0O13S0	27	28	0	13	0
313.141	7368840	C17H22N0O4S0	17	22	0	4	0
571.106	7368987	C25H24N0O14S0	25	24	0	14	0
387.048	7380475	C20H12N0O7S0	20	12	0	7	0
385.199	7391649	C21H30N0O5S0	21	30	0	5	0
401.096	4504983	C17H18N2O8S0	17	18	2	8	0
565.168	7399920	C28H30N0O11S0	28	30	0	11	0
359.089	7403007	C20H16N0O5S0	20	16	0	5	0
561.231	7422487	C27H38N0O11S0	27	38	0	11	0
287.053	7435697	C13H12N0O6S0	13	12	0	6	0
599.21	7444104	C29H36N0O12S0	29	36	0	12	0
369.022	12820588	C16H10N0O9S0	16	10	0	9	0
316.079	5575038	C14H15N1O6S0	14	15	1	6	0
330.058	5620018	C14H13N1O7S0	14	13	1	7	0
573.085	7469215	C24H22N0O15S0	24	22	0	15	0
249.073	7497718	C11H14N0O5S0	11	14	0	5	0
367.006	5473881	C16H8N0O9S0	16	8	0	9	0
593.148	7513756	C25H30N0O15S0	25	30	0	15	0
403.075	5651813	C16H16N2O9S0	16	16	2	9	0
605.148	7517772	C26H30N0O15S0	26	30	0	15	0
585.158	7532459	C27H30N0O13S0	27	30	0	13	0
403.111	6862217	C17H20N2O8S0	17	20	2	8	0
443.11	7533341	C24H20N0O7S0	24	20	0	7	0
587.101	7536233	C25H24N0O15S0	25	24	0	15	0
377.136	7540740	C21H22N0O5S0	21	22	0	5	0
339.157	7556282	C19H24N0O4S0	19	24	0	4	0
373.068	7568478	C20H14N0O6S0	20	14	0	6	0
322.09	5645191	C13H17N1O7S0	13	17	1	7	0
474.137	5648936	C21H25N1O10S0	21	25	1	10	0
374.048	7123236	C15H13N1O9S0	15	13	1	9	0
387.053	7583233	C13H16N0O12S0	13	16	0	12	0
565.08	7590339	C22H22N0O16S0	22	22	0	16	0
399.163	4620754	C17H28N0O9S0	17	28	0	9	0
459.074	7593957	C16H20N0O14S0	16	20	0	14	0
405.091	6028589	C16H18N2O9S0	16	18	2	9	0
591.205	7595013	C27H36N0O13S0	27	36	0	13	0
507.199	7614257	C27H32N0O8S0	27	32	0	8	0
405.127	4047184	C17H22N2O8S0	17	22	2	8	0
545.054	7628641	C22H18N0O15S0	22	18	0	15	0
269.063	7651665	C10H14N0O7S0	10	14	0	7	0
265.105	7660247	C12H18N0O5S0	12	18	0	5	0
463.173	7660667	C25H28N0O7S0	25	28	0	7	0
394.111	8099031	C16H21N1O9S0	16	21	1	9	0
366.043	5677441	C13H13N1O10S0	13	13	1	10	0
456.09	5693809	C20H19N1O10S0	20	19	1	10	0
495.038	7660716	C18H16N0O15S0	18	16	0	15	0
353.172	7664421	C20H26N0O4S0	20	26	0	4	0
473.033	7671819	C19H14N0O13S0	19	14	0	13	0
589.153	7672127	C26H30N0O14S0	26	30	0	14	0
351.011	7710657	C16H8N0O8S0	16	8	0	8	0
407.106	4735177	C16H20N2O9S0	16	20	2	9	0
463.027	7715886	C21H12N0O11S0	21	12	0	11	0
487.23	7720566	C25H36N0O8S0	25	36	0	8	0
497.033	7727184	C21H14N0O13S0	21	14	0	13	0
441.225	7767645	C24H34N0O6S0	24	34	0	6	0
397.147	11415952	C17H26N0O9S0	17	26	0	9	0
292.079	5711137	C12H15N1O6S0	12	15	1	6	0
392.095	11134005	C16H19N1O9S0	16	19	1	9	0
404.132	5731710	C18H23N1O8S0	18	23	1	8	0
299.089	7806253	C15H16N0O5S0	15	16	0	5	0
341.121	7821096	C14H22N0O8S0	14	22	0	8	0
275.053	7833253	C12H12N0O6S0	12	12	0	6	0
347.183	7839602	C18H28N0O5S0	18	28	0	5	0
395.131	61825320	C17H24N0O9S0	17	24	0	9	0
283.042	7866860	C10H12N0O8S0	10	12	0	8	0
567.22	7876068	C29H36N0O10S0	29	36	0	10	0
387.084	7882276	C21H16N0O6S0	21	16	0	6	0
515.043	7893610	C21H16N0O14S0	21	16	0	14	0
603.132	7900068	C26H28N0O15S0	26	28	0	15	0
395.022	7900338	C14H12N0O12S0	14	12	0	12	0
338.085	5738253	C13H17N1O8S0	13	17	1	8	0
318.058	5766787	C13H13N1O7S0	13	13	1	7	0
581.127	7912891	C27H26N0O13S0	27	26	0	13	0
579.168	7918262	C25H32N0O14S0	25	32	0	14	0
569.09	7926121	C25H22N0O14S0	25	22	0	14	0
361.074	7932985	C12H18N0O11S0	12	18	0	11	0
413.011	7940633	C17H10N0O11S0	17	10	0	11	0
539.101	7950873	C21H24N0O15S0	21	24	0	15	0
555.075	7957826	C24H20N0O14S0	24	20	0	14	0
275.125	7959234	C14H20N0O4S0	14	20	0	4	0
473.157	7962696	C26H26N0O7S0	26	26	0	7	0
299.074	7970592	C11H16N0O8S0	11	16	0	8	0
539.137	7985709	C22H28N0O14S0	22	28	0	14	0
605.184	7986777	C27H34N0O14S0	27	34	0	14	0
332.11	5787586	C15H19N1O6S0	15	19	1	6	0
358.053	5794467	C15H13N1O8S0	15	13	1	8	0
349.074	7991679	C11H18N0O11S0	11	18	0	11	0
541.059	8048249	C23H18N0O14S0	23	18	0	14	0
393.116	139688088	C17H22N0O9S0	17	22	0	9	0
425.012	8066362	C18H10N0O11S0	18	10	0	11	0
499.142	8073261	C20H28N0O13S0	20	28	0	13	0
465.188	8078488	C25H30N0O7S0	25	30	0	7	0
485.054	8081021	C17H18N0O15S0	17	18	0	15	0
377.027	8096639	C18H10N0O8S0	18	10	0	8	0
333.167	8099133	C17H26N0O5S0	17	26	0	5	0
447.032	8101043	C21H12N0O10S0	21	12	0	10	0
601.226	8145191	C29H38N0O12S0	29	38	0	12	0
391.152	8154142	C22H24N0O5S0	22	24	0	5	0
429.131	8161658	C24H22N0O6S0	24	22	0	6	0
390.079	11125615	C16H17N1O9S0	16	17	1	9	0
402.116	5826978	C18H21N1O8S0	18	21	1	8	0
442.147	5864627	C21H25N1O8S0	21	25	1	8	0
573.231	8173792	C28H38N0O11S0	28	38	0	11	0
401.063	8195447	C21H14N0O7S0	21	14	0	7	0
443.116	8208160	C17H24N0O12S0	17	24	0	12	0
527.101	8214413	C20H24N0O15S0	20	24	0	15	0
551.189	8217827	C28H32N0O10S0	28	32	0	10	0
551.064	8221854	C21H20N0O16S0	21	20	0	16	0
477.188	8227822	C26H30N0O7S0	26	30	0	7	0
415.111	4848982	C18H20N2O8S0	18	20	2	8	0
317.172	8235634	C17H26N0O4S0	17	26	0	4	0
505.074	8262447	C24H18N0O11S0	24	18	0	11	0
453.028	8298146	C16H14N0O14S0	16	14	0	14	0
443.043	8306418	C15H16N0O14S0	15	16	0	14	0
317.115	8312367	C19H18N0O3S0	19	18	0	3	0
599.137	8312431	C27H28N0O14S0	27	28	0	14	0
430.075	5865524	C18H17N1O10S0	18	17	1	10	0
460.085	5907978	C19H19N1O11S0	19	19	1	11	0
324.069	5921574	C12H15N1O8S0	12	15	1	8	0
309.037	8316767	C15H10N0O6S0	15	10	0	6	0
481.038	8324890	C21H14N0O12S0	21	14	0	12	0
567.147	8332737	C27H28N0O12S0	27	28	0	12	0
499.048	8361985	C21H16N0O13S0	21	16	0	13	0
455.152	8379232	C19H28N0O11S0	19	28	0	11	0
417.09	4864512	C17H18N2O9S0	17	18	2	9	0
391.1	144322533	C17H20N0O9S0	17	20	0	9	0
497.163	8392845	C21H30N0O12S0	21	30	0	12	0
417.127	3994656	C18H22N2O8S0	18	22	2	8	0
549.137	8400998	C27H26N0O11S0	27	26	0	11	0
389.084	82208525	C17H18N0O9S0	17	18	0	9	0
539.116	8426017	C25H24N0O12S0	25	24	0	12	0
435.199	8469126	C21H32N0O8S0	21	32	0	8	0
415.209	8469932	C22H32N0O6S0	22	32	0	6	0
478.132	5951923	C20H25N1O11S0	20	25	1	11	0
438.064	6002223	C16H17N1O12S0	16	17	1	12	0
472.085	6005304	C20H19N1O11S0	20	19	1	11	0
553.153	8470820	C23H30N0O14S0	23	30	0	14	0
525.1	8485692	C24H22N0O12S0	24	22	0	12	0
597.194	8514537	C29H34N0O12S0	29	34	0	12	0
419.07	4607621	C16H16N2O10S0	16	16	2	10	0
387.069	49692179	C17H16N0O9S0	17	16	0	9	0
553.08	8542460	C21H22N0O16S0	21	22	0	16	0
485.033	8543859	C20H14N0O13S0	20	14	0	13	0
419.106	9130659	C17H20N2O9S0	17	20	2	9	0
267.047	8547859	C10H12N0O7S0	10	12	0	7	0
551.153	8578255	C27H28N0O11S0	27	28	0	11	0
471.111	8580181	C18H24N0O13S0	18	24	0	13	0
307.152	8592356	C15H24N0O5S0	15	24	0	5	0
601.189	8605979	C28H34N0O13S0	28	34	0	13	0
611.137	8617583	C28H28N0O14S0	28	28	0	14	0
388.064	6883974	C16H15N1O9S0	16	15	1	9	0
410.106	6210506	C16H21N1O10S0	16	21	1	10	0
294.058	6232136	C11H13N1O7S0	11	13	1	7	0
499.106	8648732	C19H24N0O14S0	19	24	0	14	0
261.073	8650139	C12H14N0O5S0	12	14	0	5	0
385.053	25101559	C17H14N0O9S0	17	14	0	9	0
521.054	8692394	C20H18N0O15S0	20	18	0	15	0
421.085	4658434	C16H18N2O10S0	16	18	2	10	0
527.064	8692601	C19H20N0O16S0	19	20	0	16	0
429.095	8706399	C23H18N0O7S0	23	18	0	7	0
403.027	8732981	C16H12N0O11S0	16	12	0	11	0
591.168	8737785	C26H32N0O14S0	26	32	0	14	0
479.204	8739763	C26H32N0O7S0	26	32	0	7	0
313.089	8746062	C12H18N0O8S0	12	18	0	8	0
535.121	8749367	C26H24N0O11S0	26	24	0	11	0
464.116	6235754	C19H23N1O11S0	19	23	1	11	0
434.069	6248303	C17H17N1O11S0	17	17	1	11	0
491.168	8774049	C26H28N0O8S0	26	28	0	8	0
341.027	8781480	C15H10N0O8S0	15	10	0	8	0
461.157	8785995	C25H26N0O7S0	25	26	0	7	0
445.22	8815697	C23H34N0O7S0	23	34	0	7	0
311.053	8816551	C15H12N0O6S0	15	12	0	6	0
423.101	4891481	C16H20N2O10S0	16	20	2	10	0
383.037	20618172	C17H12N0O9S0	17	12	0	9	0
577.153	8867710	C25H30N0O14S0	25	30	0	14	0
329.048	8872970	C11H14N0O10S0	11	14	0	10	0
569.127	8884603	C26H26N0O13S0	26	26	0	13	0
575.101	8901655	C24H24N0O15S0	24	24	0	15	0
283.079	8951805	C11H16N0O7S0	11	16	0	7	0
450.064	6266841	C17H17N1O12S0	17	17	1	12	0
386.048	6366587	C16H13N1O9S0	16	13	1	9	0
569.236	8966574	C29H38N0O10S0	29	38	0	10	0
253.068	8987138	C10H14N0O6S0	10	14	0	6	0
329.027	8998895	C14H10N0O8S0	14	10	0	8	0
327.048	9008110	C15H12N0O7S0	15	12	0	7	0
289.141	9040942	C15H22N0O4S0	15	22	0	4	0
403.043	9050437	C20H12N0O8S0	20	12	0	8	0
583.179	9060556	C28H32N0O12S0	28	32	0	12	0
473.121	9070646	C25H22N0O8S0	25	22	0	8	0
559.069	9076135	C23H20N0O15S0	23	20	0	15	0
381.022	14807649	C17H10N0O9S0	17	10	0	9	0
481.22	9109360	C26H34N0O7S0	26	34	0	7	0
372.105	6286248	C17H19N1O7S0	17	19	1	7	0
490.096	6322094	C20H21N1O12S0	20	21	1	12	0
452.08	6349948	C17H19N1O12S0	17	19	1	12	0
499.23	9115735	C26H36N0O8S0	26	36	0	8	0
537.064	9116044	C24H18N0O13S0	24	18	0	13	0
373.105	9149580	C21H18N0O5S0	21	18	0	5	0
485.127	9166495	C19H26N0O13S0	19	26	0	13	0
309.073	9185156	C16H14N0O5S0	16	14	0	5	0
567.096	9233832	C22H24N0O16S0	22	24	0	16	0
545.236	9246664	C27H38N0O10S0	27	38	0	10	0
427.111	4616075	C19H20N2O8S0	19	20	2	8	0
553.116	9251088	C22H26N0O15S0	22	26	0	15	0
417.131	9264163	C23H22N0O6S0	23	22	0	6	0
577.117	9291630	C24H26N0O15S0	24	26	0	15	0
521.199	9325304	C24H34N0O11S0	24	34	0	11	0
379.006	6616296	C17H8N0O9S0	17	8	0	9	0
511.23	9371372	C27H36N0O8S0	27	36	0	8	0
408.126	4074642	C17H23N1O9S0	17	23	1	9	0
304.079	6399052	C13H15N1O6S0	13	15	1	6	0
406.111	9022732	C17H21N1O9S0	17	21	1	9	0
489.079	9381332	C24H18N0O10S0	24	18	0	10	0
549.085	9384009	C22H22N0O15S0	22	22	0	15	0
319.058	9425702	C17H12N0O5S0	17	12	0	5	0
553.095	9443588	C25H22N0O13S0	25	22	0	13	0
525.121	9454408	C21H26N0O14S0	21	26	0	14	0
325.032	9513956	C15H10N0O7S0	15	10	0	7	0
563.101	9516507	C23H24N0O15S0	23	24	0	15	0
537.1	9518497	C25H22N0O12S0	25	22	0	12	0
603.168	9536433	C27H32N0O14S0	27	32	0	14	0
411.162	8538004	C18H28N0O9S0	18	28	0	9	0
577.189	9582477	C26H34N0O13S0	26	34	0	13	0
571.142	9590059	C26H28N0O13S0	26	28	0	13	0
537.137	9604533	C26H26N0O11S0	26	26	0	11	0
448.085	6402869	C18H19N1O11S0	18	19	1	11	0
462.101	6404675	C19H21N1O11S0	19	21	1	11	0
389.194	9621385	C20H30N0O6S0	20	30	0	6	0
449.157	9632187	C24H26N0O7S0	24	26	0	7	0
439.027	9634997	C19H12N0O11S0	19	12	0	11	0
563.21	9645586	C26H36N0O12S0	26	36	0	12	0
363.178	9652988	C18H28N0O6S0	18	28	0	6	0
439.209	9659694	C24H32N0O6S0	24	32	0	6	0
507.09	9680636	C24H20N0O11S0	24	20	0	11	0
409.147	32159824	C18H26N0O9S0	18	26	0	9	0
315.047	9702625	C14H12N0O7S0	14	12	0	7	0
475.136	9706510	C25H24N0O8S0	25	24	0	8	0
397.017	9740551	C17H10N0O10S0	17	10	0	10	0
404.095	10083675	C17H19N1O9S0	17	19	1	9	0
402.08	9061758	C17H17N1O9S0	17	17	1	9	0
377.105	9752543	C13H22N0O11S0	13	22	0	11	0
459.141	9759753	C25H24N0O7S0	25	24	0	7	0
601.152	9777422	C27H30N0O14S0	27	30	0	14	0
433.085	4781239	C17H18N2O10S0	17	18	2	10	0
461.033	9785353	C18H14N0O13S0	18	14	0	13	0
461.215	9859178	C23H34N0O8S0	23	34	0	8	0
433.122	3987665	C18H22N2O9S0	18	22	2	9	0
555.111	9864534	C25H24N0O13S0	25	24	0	13	0
375.048	9868795	C19H12N0O7S0	19	12	0	7	0
337.032	9872765	C16H10N0O7S0	16	10	0	7	0
361.105	9873505	C20H18N0O5S0	20	18	0	5	0
400.064	4317559	C17H15N1O9S0	17	15	1	9	0
436.121	6639876	C18H23N1O10S0	18	23	1	10	0
450.101	6653935	C18H21N1O11S0	18	21	1	11	0
495.184	9875696	C22H32N0O11S0	22	32	0	11	0
417.058	9880549	C21H14N0O8S0	21	14	0	8	0
435.065	3822632	C16H16N2O11S0	16	16	2	11	0
465.043	9889869	C21H14N0O11S0	21	14	0	11	0
267.084	9899555	C11H16N0O6S0	11	16	0	6	0
435.101	4484674	C17H20N2O10S0	17	20	2	10	0
509.215	9917193	C27H34N0O8S0	27	34	0	8	0
539.152	9953846	C26H28N0O11S0	26	28	0	11	0
511.142	9993920	C21H28N0O13S0	21	28	0	13	0
467.204	9997477	C25H32N0O7S0	25	32	0	7	0
523.158	10002200	C26H28N0O10S0	26	28	0	10	0
349.032	10033478	C17H10N0O7S0	17	10	0	7	0
474.101	6793750	C20H21N1O11S0	20	21	1	11	0
336.105	6824092	C14H19N1O7S0	14	19	1	7	0
398.048	3942727	C17H13N1O9S0	17	13	1	9	0
251.089	10059458	C11H16N0O5S0	11	16	0	5	0
523.121	10102532	C25H24N0O11S0	25	24	0	11	0
415.079	10118458	C22H16N0O7S0	22	16	0	7	0
603.205	10126269	C28H36N0O13S0	28	36	0	13	0
327.105	10177080	C13H20N0O8S0	13	20	0	8	0
587.137	10178166	C26H28N0O14S0	26	28	0	14	0
437.116	3830957	C17H22N2O10S0	17	22	2	10	0
547.215	10179627	C26H36N0O11S0	26	36	0	11	0
407.131	124678369	C18H24N0O9S0	18	24	0	9	0
523.085	10206960	C24H20N0O12S0	24	20	0	12	0
469.22	10223779	C25H34N0O7S0	25	34	0	7	0
569.163	10224012	C27H30N0O12S0	27	30	0	12	0
332.074	6888338	C14H15N1O7S0	14	15	1	7	0
420.127	9276913	C18H23N1O9S0	18	23	1	9	0
382.075	7309127	C14H17N1O10S0	14	17	1	10	0
497.054	10249306	C18H18N0O15S0	18	18	0	15	0
327.032	10252763	C11H12N0O10S0	11	12	0	10	0
495.054	10266803	C22H16N0O12S0	22	16	0	12	0
409.162	10277982	C22H26N0O6S0	22	26	0	6	0
491.095	10293631	C24H20N0O10S0	24	20	0	10	0
599.174	10299004	C28H32N0O13S0	28	32	0	13	0
365.136	10310892	C20H22N0O5S0	20	22	0	5	0
379.121	10316147	C13H24N0O11S0	13	24	0	11	0
513.064	10355328	C22H18N0O13S0	22	18	0	13	0
413.033	10370604	C14H14N0O13S0	14	14	0	13	0
573.122	10410160	C25H26N0O14S0	25	26	0	14	0
511.048	10415761	C22H16N0O13S0	22	16	0	13	0
507.126	10436366	C25H24N0O10S0	25	24	0	10	0
360.105	7315262	C16H19N1O7S0	16	19	1	7	0
359.183	10442363	C19H28N0O5S0	19	28	0	5	0
457.095	10450850	C17H22N0O13S0	17	22	0	13	0
323.089	10451549	C17H16N0O5S0	17	16	0	5	0
415.115	10458458	C23H20N0O6S0	23	20	0	6	0
401.1	10473884	C22H18N0O6S0	22	18	0	6	0
217.068	10481125	C7H14N0O6S0	7	14	0	6	0
453.173	10551030	C20H30N0O10S0	20	30	0	10	0
419.147	10595013	C23H24N0O6S0	23	24	0	6	0
585.194	10619832	C28H34N0O12S0	28	34	0	12	0
427.209	10630101	C23H32N0O6S0	23	32	0	6	0
435.032	10668562	C20H12N0O10S0	20	12	0	10	0
561.085	10672587	C23H22N0O15S0	23	22	0	15	0
399.126	10682797	C16H24N0O10S0	16	24	0	10	0
347.053	10708673	C18H12N0O6S0	18	12	0	6	0
410.069	7499689	C15H17N1O11S0	15	17	1	11	0
418.111	9171810	C18H21N1O9S0	18	21	1	9	0
396.09	7531821	C15H19N1O10S0	15	19	1	10	0
457.038	10745730	C19H14N0O12S0	19	14	0	12	0
375.12	10753621	C21H20N0O5S0	21	20	0	5	0
415.085	10755391	C15H20N0O12S0	15	20	0	12	0
405.116	157608261	C18H22N0O9S0	18	22	0	9	0
565.117	10768854	C23H26N0O15S0	23	26	0	15	0
445.126	10804246	C24H22N0O7S0	24	22	0	7	0
569.199	10885533	C28H34N0O11S0	28	34	0	11	0
493.183	10888523	C26H30N0O8S0	26	30	0	8	0
449.048	10900858	C21H14N0O10S0	21	14	0	10	0
509.069	10951361	C23H18N0O12S0	23	18	0	12	0
505.11	10963776	C25H22N0O10S0	25	22	0	10	0
531.075	10997823	C22H20N0O14S0	22	20	0	14	0
395.168	11000143	C18H28N0O8S0	18	28	0	8	0
420.054	7539125	C16H15N1O11S0	16	15	1	11	0
322.053	7564635	C12H13N1O8S0	12	13	1	8	0
416.095	6133931	C18H19N1O9S0	18	19	1	9	0
523.178	11001635	C23H32N0O12S0	23	32	0	12	0
575.137	11029542	C25H28N0O14S0	25	28	0	14	0
535.07	11039001	C21H20N0O15S0	21	20	0	15	0
567.184	11054547	C28H32N0O11S0	28	32	0	11	0
537.173	11056586	C27H30N0O10S0	27	30	0	10	0
485.09	11060878	C18H22N0O14S0	18	22	0	14	0
415.027	11109645	C17H12N0O11S0	17	12	0	11	0
445.09	11119616	C23H18N0O8S0	23	18	0	8	0
403.1	103702910	C18H20N0O9S0	18	20	0	9	0
589.189	11141451	C27H34N0O13S0	27	34	0	13	0
446.106	7757432	C19H21N1O10S0	19	21	1	10	0
308.074	7793028	C12H15N1O7S0	12	15	1	7	0
521.105	11184838	C25H22N0O11S0	25	22	0	11	0
483.053	11193042	C21H16N0O12S0	21	16	0	12	0
489.152	11226614	C26H26N0O8S0	26	26	0	8	0
313.068	11228215	C15H14N0O6S0	15	14	0	6	0
447.101	4022493	C18H20N2O10S0	18	20	2	10	0
339.141	11232421	C15H24N0O7S0	15	24	0	7	0
347.089	11271922	C19H16N0O5S0	19	16	0	5	0
383.183	11275367	C21H28N0O5S0	21	28	0	5	0
483.147	11279102	C20H28N0O12S0	20	28	0	12	0
557.236	11280853	C28H38N0O10S0	28	38	0	10	0
343.064	11326848	C12H16N0O10S0	12	16	0	10	0
389.063	11329269	C20H14N0O7S0	20	14	0	7	0
464.08	7872087	C18H19N1O12S0	18	19	1	12	0
346.09	7931296	C15H17N1O7S0	15	17	1	7	0
401.084	54081932	C18H18N0O9S0	18	18	0	9	0
527.08	11425665	C23H20N0O13S0	23	20	0	13	0
587.21	11450000	C28H36N0O12S0	28	36	0	12	0
449.08	3867021	C17H18N2O11S0	17	18	2	11	0
587.174	11452035	C27H32N0O13S0	27	32	0	13	0
399.069	31293809	C18H16N0O9S0	18	16	0	9	0
407.147	11501807	C22H24N0O6S0	22	24	0	6	0
397.053	24041773	C18H14N0O9S0	18	14	0	9	0
491.043	11512167	C19H16N0O14S0	19	16	0	14	0
355.027	11535583	C12H12N0O11S0	12	12	0	11	0
333.073	11573441	C18H14N0O5S0	18	14	0	5	0
325.126	11580507	C14H22N0O7S0	14	22	0	7	0
334.053	7992795	C13H13N1O8S0	13	13	1	8	0
392.059	8025101	C15H15N1O10S0	15	15	1	10	0
358.09	8065235	C16H17N1O7S0	16	17	1	7	0
449.033	11607409	C17H14N0O13S0	17	14	0	13	0
395.038	16822467	C18H12N0O9S0	18	12	0	9	0
549.121	11692126	C23H26N0O14S0	23	26	0	14	0
477.152	11712476	C25H26N0O8S0	25	26	0	8	0
431.074	11738895	C22H16N0O8S0	22	16	0	8	0
553.132	11755800	C26H26N0O12S0	26	26	0	12	0
379.152	11755928	C21H24N0O5S0	21	24	0	5	0
323.146	11770533	C15H24N0O6S0	15	24	0	6	0
571.215	11773261	C28H36N0O11S0	28	36	0	11	0
477.079	11794361	C23H18N0O10S0	23	18	0	10	0
321.073	11795625	C17H14N0O5S0	17	14	0	5	0
414.08	7701965	C18H17N1O9S0	18	17	1	9	0
380.059	8108510	C14H15N1O10S0	14	15	1	10	0
557.09	11796870	C24H22N0O14S0	24	22	0	14	0
511.07	11835036	C19H20N0O15S0	19	20	0	15	0
555.22	11838865	C28H36N0O10S0	28	36	0	10	0
337.105	11838944	C18H18N0O5S0	18	18	0	5	0
499.069	11845643	C18H20N0O15S0	18	20	0	15	0
525.158	11854684	C22H30N0O13S0	22	30	0	13	0
539.189	11878987	C27H32N0O10S0	27	32	0	10	0
509.054	11879098	C19H18N0O15S0	19	18	0	15	0
391.027	11894675	C15H12N0O11S0	15	12	0	11	0
393.022	8381490	C18H10N0O9S0	18	10	0	9	0
493.074	11922712	C23H18N0O11S0	23	18	0	11	0
434.106	8169353	C18H21N1O10S0	18	21	1	10	0
351.12	11947093	C19H20N0O5S0	19	20	0	5	0
391.043	11956133	C19H12N0O8S0	19	12	0	8	0
537.085	11992472	C21H22N0O15S0	21	22	0	15	0
425.178	4568508	C19H30N0O9S0	19	30	0	9	0
541.132	12021411	C25H26N0O12S0	25	26	0	12	0
309.131	12043200	C14H22N0O6S0	14	22	0	6	0
363.126	12069560	C13H24N0O10S0	13	24	0	10	0
571.179	12100924	C27H32N0O12S0	27	32	0	12	0
469.038	12109895	C20H14N0O12S0	20	14	0	12	0
459.105	12119029	C24H20N0O8S0	24	20	0	8	0
541.095	12121742	C24H22N0O13S0	24	22	0	13	0
325.068	12123154	C16H14N0O6S0	16	14	0	6	0
444.09	8184203	C19H19N1O10S0	19	19	1	10	0
424.085	8211044	C16H19N1O11S0	16	19	1	11	0
361.068	12126257	C19H14N0O6S0	19	14	0	6	0
423.162	29841290	C19H28N0O9S0	19	28	0	9	0
457.059	12153742	C16H18N0O14S0	16	18	0	14	0
421.147	90988852	C19H26N0O9S0	19	26	0	9	0
513.085	12190346	C19H22N0O15S0	19	22	0	15	0
551.101	12201138	C22H24N0O15S0	22	24	0	15	0
575.21	12223558	C27H36N0O12S0	27	36	0	12	0
537.158	12225986	C23H30N0O13S0	23	30	0	13	0
287.125	12244951	C15H20N0O4S0	15	20	0	4	0
353.027	12248674	C16H10N0O8S0	16	10	0	8	0
419.131	145529528	C19H24N0O9S0	19	24	0	9	0
551.174	12344538	C24H32N0O13S0	24	32	0	13	0
561.121	12349918	C24H26N0O14S0	24	26	0	14	0
360.069	8427277	C15H15N1O8S0	15	15	1	8	0
412.064	5712582	C18H15N1O9S0	18	15	1	9	0
478.096	8550817	C19H21N1O12S0	19	21	1	12	0
547.069	12407768	C22H20N0O15S0	22	20	0	15	0
417.116	121771030	C19H22N0O9S0	19	22	0	9	0
421.162	12484929	C23H26N0O6S0	23	26	0	6	0
565.153	12493288	C24H30N0O14S0	24	30	0	14	0
559.106	12537275	C24H24N0O14S0	24	24	0	14	0
379.085	12544327	C12H20N0O12S0	12	20	0	12	0
463.064	12557377	C22H16N0O10S0	22	16	0	10	0
313.105	12588127	C16H18N0O5S0	16	18	0	5	0
365.027	12602463	C17H10N0O8S0	17	10	0	8	0
415.1	68177228	C19H20N0O9S0	19	20	0	9	0
517.059	12630645	C21H18N0O14S0	21	18	0	14	0
378.116	8608944	C16H21N1O8S0	16	21	1	8	0
434.142	5661603	C19H25N1O9S0	19	25	1	9	0
334.09	8916492	C14H17N1O7S0	14	17	1	7	0
553.168	12661036	C27H30N0O11S0	27	30	0	11	0
447.142	12687606	C24H24N0O7S0	24	24	0	7	0
479.059	12718958	C22H16N0O11S0	22	16	0	11	0
441.137	12730916	C18H26N0O11S0	18	26	0	11	0
549.194	12744839	C25H34N0O12S0	25	34	0	12	0
461.117	4080182	C19H22N2O10S0	19	22	2	10	0
297.094	12747001	C12H18N0O7S0	12	18	0	7	0
511.085	12764835	C23H20N0O12S0	23	20	0	12	0
431.11	12781354	C23H20N0O7S0	23	20	0	7	0
523.07	12820200	C20H20N0O15S0	20	20	0	15	0
413.084	40191578	C19H18N0O9S0	19	18	0	9	0
432.09	8932847	C18H19N1O10S0	18	19	1	10	0
432.126	6272521	C19H23N1O9S0	19	23	1	9	0
348.105	9024602	C15H19N1O7S0	15	19	1	7	0
279.047	12841223	C11H12N0O7S0	11	12	0	7	0
411.069	30543678	C19H16N0O9S0	19	16	0	9	0
409.053	17424376	C19H14N0O9S0	19	14	0	9	0
509.106	12847827	C24H22N0O11S0	24	22	0	11	0
325.105	12850240	C17H18N0O5S0	17	18	0	5	0
435.141	12880478	C23H24N0O7S0	23	24	0	7	0
281.1	12911740	C12H18N0O6S0	12	18	0	6	0
575.174	12979254	C26H32N0O13S0	26	32	0	13	0
531.22	13009041	C26H36N0O10S0	26	36	0	10	0
543.074	13062905	C23H20N0O14S0	23	20	0	14	0
430.111	6504527	C19H21N1O9S0	19	21	1	9	0
436.085	9118955	C17H19N1O11S0	17	19	1	11	0
319.152	13070230	C16H24N0O5S0	16	24	0	5	0
463.136	13075559	C24H24N0O8S0	24	24	0	8	0
553.204	13097280	C28H34N0O10S0	28	34	0	10	0
511.106	13162158	C20H24N0O14S0	20	24	0	14	0
457.22	13162471	C24H34N0O7S0	24	34	0	7	0
381.167	13187854	C21H26N0O5S0	21	26	0	5	0
405.131	13232468	C22H22N0O6S0	22	22	0	6	0
537.121	13258157	C22H26N0O14S0	22	26	0	14	0
339.12	13309064	C18H20N0O5S0	18	20	0	5	0
427.027	13357899	C18H12N0O11S0	18	12	0	11	0
497.069	13368417	C22H18N0O12S0	22	18	0	12	0
428.095	5436019	C19H19N1O9S0	19	19	1	9	0
372.069	9193338	C16H15N1O8S0	16	15	1	8	0
438.101	9222727	C17H21N1O11S0	17	21	1	11	0
389.1	13379358	C21H18N0O6S0	21	18	0	6	0
407.037	15720583	C19H12N0O9S0	19	12	0	9	0
547.106	13382637	C23H24N0O14S0	23	24	0	14	0
525.085	13398836	C20H22N0O15S0	20	22	0	15	0
357.043	13521763	C12H14N0O11S0	12	14	0	11	0
265.068	13534919	C11H14N0O6S0	11	14	0	6	0
363.048	13546066	C18H12N0O7S0	18	12	0	7	0
509.142	13566693	C25H26N0O10S0	25	26	0	10	0
529.095	13573094	C23H22N0O13S0	23	22	0	13	0
451.173	13591145	C24H28N0O7S0	24	28	0	7	0
425.193	13594055	C23H30N0O6S0	23	30	0	6	0
295.115	13604659	C13H20N0O6S0	13	20	0	6	0
573.158	13625536	C26H30N0O13S0	26	30	0	13	0
455.043	13677347	C16H16N0O14S0	16	16	0	14	0
479.043	13693798	C18H16N0O14S0	18	16	0	14	0
263.089	13709139	C12H16N0O5S0	12	16	0	5	0
431.204	13741934	C22H32N0O7S0	22	32	0	7	0
533.09	13788339	C22H22N0O14S0	22	22	0	14	0
349.105	13801897	C19H18N0O5S0	19	18	0	5	0
423.178	13852566	C23H28N0O6S0	23	28	0	6	0
497.214	13870245	C26H34N0O8S0	26	34	0	8	0
303.047	13876372	C13H12N0O7S0	13	12	0	7	0
515.08	13876860	C22H20N0O13S0	22	20	0	13	0
426.08	6615157	C19H17N1O9S0	19	17	1	9	0
388.1	9423535	C17H19N1O8S0	17	19	1	8	0
557.127	13891994	C25H26N0O13S0	25	26	0	13	0
385.11	13905210	C15H22N0O10S0	15	22	0	10	0
493.111	13937961	C24H22N0O10S0	24	22	0	10	0
437.033	13965172	C16H14N0O13S0	16	14	0	13	0
543.111	13974285	C24H24N0O13S0	24	24	0	13	0
461.121	13989944	C24H22N0O8S0	24	22	0	8	0
563.137	14038509	C24H28N0O14S0	24	28	0	14	0
485.215	14196424	C25H34N0O8S0	25	34	0	8	0
527.116	14239638	C24H24N0O12S0	24	24	0	12	0
505.204	14277485	C24H34N0O10S0	24	34	0	10	0
287.089	14303172	C14H16N0O5S0	14	16	0	5	0
408.09	9632880	C16H19N1O10S0	16	19	1	10	0
418.074	9662275	C17H17N1O10S0	17	17	1	10	0
424.064	4342868	C19H15N1O9S0	19	15	1	9	0
423.032	14309155	C19H12N0O10S0	19	12	0	10	0
367.152	14319380	C20H24N0O5S0	20	24	0	5	0
525.137	14398288	C25H26N0O11S0	25	26	0	11	0
555.184	14456190	C27H32N0O11S0	27	32	0	11	0
353.136	14458612	C19H22N0O5S0	19	22	0	5	0
335.089	14473030	C18H16N0O5S0	18	16	0	5	0
387.032	14489065	C16H12N0O10S0	16	12	0	10	0
443.08	14493449	C16H20N0O13S0	16	20	0	13	0
401.194	14551547	C21H30N0O6S0	21	30	0	6	0
405.022	7457002	C19H10N0O9S0	19	10	0	9	0
401.069	14649725	C14H18N0O12S0	14	18	0	12	0
403.006	3747872	C19H8N0O9S0	19	8	0	9	0
390.116	9722776	C17H21N1O8S0	17	21	1	8	0
320.074	9743339	C13H15N1O7S0	13	15	1	7	0
573.194	14723280	C27H34N0O12S0	27	34	0	12	0
275.089	14738099	C13H16N0O5S0	13	16	0	5	0
415.048	14781727	C14H16N0O13S0	14	16	0	13	0
439.194	3799331	C20H32N0O9S0	20	32	0	9	0
291.047	14913689	C12H12N0O7S0	12	12	0	7	0
495.199	14936311	C26H32N0O8S0	26	32	0	8	0
403.115	15014285	C22H20N0O6S0	22	20	0	6	0
393.131	15024297	C21H22N0O6S0	21	22	0	6	0
425.033	15031626	C15H14N0O13S0	15	14	0	13	0
301.068	15080884	C14H14N0O6S0	14	14	0	6	0
551.137	15129798	C23H28N0O14S0	23	28	0	14	0
422.069	9745439	C16H17N1O11S0	16	17	1	11	0
394.075	9788592	C15H17N1O10S0	15	17	1	10	0
519.075	15214225	C21H20N0O14S0	21	20	0	14	0
481.168	15243096	C21H30N0O11S0	21	30	0	11	0
371.183	15348511	C20H28N0O5S0	20	28	0	5	0
345.167	15348918	C18H26N0O5S0	18	26	0	5	0
505.059	15383335	C20H18N0O14S0	20	18	0	14	0
405.058	15384845	C20H14N0O8S0	20	14	0	8	0
437.178	16789463	C20H30N0O9S0	20	30	0	9	0
487.048	15444514	C20H16N0O13S0	20	16	0	13	0
379.173	15503793	C18H28N0O7S0	18	28	0	7	0
357.079	15512467	C13H18N0O10S0	13	18	0	10	0
467.059	15586395	C21H16N0O11S0	21	16	0	11	0
406.075	10015977	C16H17N1O10S0	16	17	1	10	0
444.127	5654946	C20H23N1O9S0	20	23	1	9	0
417.095	15619076	C22H18N0O7S0	22	18	0	7	0
429.064	15683912	C15H18N0O13S0	15	18	0	13	0
445.038	15717343	C18H14N0O12S0	18	14	0	12	0
435.163	60541548	C20H28N0O9S0	20	28	0	9	0
403.079	15739241	C21H16N0O7S0	21	16	0	7	0
543.22	15764300	C27H36N0O10S0	27	36	0	10	0
453.043	15771306	C20H14N0O11S0	20	14	0	11	0
549.158	15771762	C24H30N0O13S0	24	30	0	13	0
465.152	15802501	C24H26N0O8S0	24	26	0	8	0
555.147	15811946	C26H28N0O12S0	26	28	0	12	0
422.106	10445884	C17H21N1O10S0	17	21	1	10	0
442.111	5327003	C20H21N1O9S0	20	21	1	9	0
559.215	15838709	C27H36N0O11S0	27	36	0	11	0
479.095	15903615	C23H20N0O10S0	23	20	0	10	0
363.032	15950398	C14H12N0O10S0	14	12	0	10	0
473.214	15982692	C24H34N0O8S0	24	34	0	8	0
385.038	16012517	C13H14N0O12S0	13	14	0	12	0
335.053	16121621	C17H12N0O6S0	17	12	0	6	0
327.084	16123421	C16H16N0O6S0	16	16	0	6	0
343.042	16175459	C15H12N0O8S0	15	12	0	8	0
379.115	16185708	C20H20N0O6S0	20	20	0	6	0
367.027	16199284	C13H12N0O11S0	13	12	0	11	0
460.158	4121137	C21H27N1O9S0	21	27	1	9	0
433.147	116442339	C20H26N0O9S0	20	26	0	9	0
433.126	16221396	C23H22N0O7S0	23	22	0	7	0
413.193	16279227	C22H30N0O6S0	22	30	0	6	0
513.1	16304786	C23H22N0O12S0	23	22	0	12	0
447.105	16324831	C23H20N0O8S0	23	20	0	8	0
481.074	16342827	C22H18N0O11S0	22	18	0	11	0
563.173	16401920	C25H32N0O13S0	25	32	0	13	0
375.084	16404008	C20H16N0O6S0	20	16	0	6	0
431.131	108445497	C20H24N0O9S0	20	24	0	9	0
371.095	16448176	C14H20N0O10S0	14	20	0	10	0
545.09	16449397	C23H22N0O14S0	23	22	0	14	0
443.204	16461657	C23H32N0O7S0	23	32	0	7	0
395.147	16517432	C21H24N0O6S0	21	24	0	6	0
501.064	16520120	C21H18N0O13S0	21	18	0	13	0
277.105	16528865	C13H18N0O5S0	13	18	0	5	0
429.116	70416750	C20H22N0O9S0	20	22	0	9	0
561.194	16544260	C26H34N0O12S0	26	34	0	12	0
335.095	16623438	C11H20N0O10S0	11	20	0	10	0
511.121	16664245	C24H24N0O11S0	24	24	0	11	0
529.204	16682019	C26H34N0O10S0	26	34	0	10	0
349.162	16734711	C17H26N0O6S0	17	26	0	6	0
523.142	16752399	C22H28N0O13S0	22	28	0	13	0
497.126	16759932	C20H26N0O13S0	20	26	0	13	0
427.1	42210178	C20H20N0O9S0	20	20	0	9	0
467.043	16790611	C17H16N0O14S0	17	16	0	14	0
458.142	4448741	C21H25N1O9S0	21	25	1	9	0
425.084	28974451	C20H18N0O9S0	20	18	0	9	0
471.075	16936003	C17H20N0O14S0	17	20	0	14	0
323.053	16982576	C16H12N0O6S0	16	12	0	6	0
295.042	16988927	C11H12N0O8S0	11	12	0	8	0
277.068	16989650	C12H14N0O6S0	12	14	0	6	0
391.115	16992246	C21H20N0O6S0	21	20	0	6	0
423.069	27961152	C20H16N0O9S0	20	16	0	9	0
487.132	4081737	C21H24N2O10S0	21	24	2	10	0
311.11	17075172	C13H20N0O7S0	13	20	0	7	0
495.126	17111253	C24H24N0O10S0	24	24	0	10	0
495.09	17176772	C23H20N0O11S0	23	20	0	11	0
535.106	17197358	C22H24N0O14S0	22	24	0	14	0
541.168	17233591	C26H30N0O11S0	26	30	0	11	0
374.085	11239761	C16H17N1O8S0	16	17	1	8	0
557.163	17250734	C26H30N0O12S0	26	30	0	12	0
471.053	17251384	C20H16N0O12S0	20	16	0	12	0
535.179	17353048	C24H32N0O12S0	24	32	0	12	0
421.053	16443624	C20H14N0O9S0	20	14	0	9	0
419.037	7864938	C20H12N0O9S0	20	12	0	9	0
399.032	17527115	C17H12N0O10S0	17	12	0	10	0
319.042	17557268	C13H12N0O8S0	13	12	0	8	0
469.132	17614967	C19H26N0O12S0	19	26	0	12	0
517.204	17756864	C25H34N0O10S0	25	34	0	10	0
437.048	17762174	C20H14N0O10S0	20	14	0	10	0
417.022	5814214	C20H10N0O9S0	20	10	0	9	0
454.111	4003088	C21H21N1O9S0	21	21	1	9	0
449.121	17780134	C23H22N0O8S0	23	22	0	8	0
559.142	17808846	C25H28N0O13S0	25	28	0	13	0
541.205	17901260	C27H34N0O10S0	27	34	0	10	0
451.194	6697589	C21H32N0O9S0	21	32	0	9	0
327.12	17942092	C17H20N0O5S0	17	20	0	5	0
479.168	17992610	C25H28N0O8S0	25	28	0	8	0
465.079	17997920	C22H18N0O10S0	22	18	0	10	0
531.111	18030675	C23H24N0O13S0	23	24	0	13	0
469.059	18081874	C17H18N0O14S0	17	18	0	14	0
427.121	18158482	C17H24N0O11S0	17	24	0	11	0
449.178	32701896	C21H30N0O9S0	21	30	0	9	0
369.167	18213157	C20H26N0O5S0	20	26	0	5	0
364.1	12146605	C15H19N1O8S0	15	19	1	8	0
409.126	18327612	C21H22N0O7S0	21	22	0	7	0
379.027	18376961	C14H12N0O11S0	14	12	0	11	0
545.199	18493364	C26H34N0O11S0	26	34	0	11	0
447.163	69855490	C21H28N0O9S0	21	28	0	9	0
499.085	18579474	C22H20N0O12S0	22	20	0	12	0
289.068	18623492	C13H14N0O6S0	13	14	0	6	0
451.064	18625064	C21H16N0O10S0	21	16	0	10	0
507.184	18657065	C23H32N0O11S0	23	32	0	11	0
375.032	18664936	C15H12N0O10S0	15	12	0	10	0
507.075	18689780	C20H20N0O14S0	20	20	0	14	0
445.147	89056292	C21H26N0O9S0	21	26	0	9	0
336.069	12430443	C13H15N1O8S0	13	15	1	8	0
433.089	18736314	C22H18N0O8S0	22	18	0	8	0
339.084	18756695	C17H16N0O6S0	17	16	0	6	0
525.173	18764644	C26H30N0O10S0	26	30	0	10	0
455.059	18770731	C20H16N0O11S0	20	16	0	11	0
533.199	18797809	C25H34N0O11S0	25	34	0	11	0
341.063	18798298	C16H14N0O7S0	16	14	0	7	0
443.131	70885162	C21H24N0O9S0	21	24	0	9	0
479.189	18865068	C22H32N0O10S0	22	32	0	10	0
441.116	43858454	C21H22N0O9S0	21	22	0	9	0
481.11	18886461	C23H22N0O10S0	23	22	0	10	0
339.048	18914342	C16H12N0O7S0	16	12	0	7	0
547.179	18916374	C25H32N0O12S0	25	32	0	12	0
543.147	18979618	C25H28N0O12S0	25	28	0	12	0
411.032	19011357	C18H12N0O10S0	18	12	0	10	0
509.163	19051247	C22H30N0O12S0	22	30	0	12	0
297.058	19081437	C11H14N0O8S0	11	14	0	8	0
341.136	19142461	C18H22N0O5S0	18	22	0	5	0
455.204	19147646	C24H32N0O7S0	24	32	0	7	0
439.1	29492453	C21H20N0O9S0	21	20	0	9	0
447.199	19204377	C22H32N0O8S0	22	32	0	8	0
353.1	19214019	C18H18N0O6S0	18	18	0	6	0
523.106	19365628	C21H24N0O14S0	21	24	0	14	0
535.142	19392835	C23H28N0O13S0	23	28	0	13	0
281.063	19403884	C11H14N0O7S0	11	14	0	7	0
475.048	19444707	C19H16N0O13S0	19	16	0	13	0
481.183	19586911	C25H30N0O8S0	25	30	0	8	0
379.043	19777812	C18H12N0O8S0	18	12	0	8	0
363.084	19841665	C19H16N0O6S0	19	16	0	6	0
439.157	19920139	C19H28N0O10S0	19	28	0	10	0
437.084	25157527	C21H18N0O9S0	21	18	0	9	0
365.157	20026632	C17H26N0O7S0	17	26	0	7	0
469.074	20093018	C21H18N0O11S0	21	18	0	11	0
291.12	20222150	C14H20N0O5S0	14	20	0	5	0
437.157	20299721	C23H26N0O7S0	23	26	0	7	0
545.127	20311946	C24H26N0O13S0	24	26	0	13	0
421.183	20320594	C20H30N0O8S0	20	30	0	8	0
355.152	20332934	C19H24N0O5S0	19	24	0	5	0
472.158	5799516	C22H27N1O9S0	22	27	1	9	0
362.085	12694886	C15H17N1O8S0	15	17	1	8	0
420.09	12961235	C17H19N1O10S0	17	19	1	10	0
441.043	20339174	C19H14N0O11S0	19	14	0	11	0
517.095	20353672	C22H22N0O13S0	22	22	0	13	0
433.038	20354197	C17H14N0O12S0	17	14	0	12	0
529.132	20388858	C24H26N0O12S0	24	26	0	12	0
561.158	20406769	C25H30N0O13S0	25	30	0	13	0
337.068	20416942	C17H14N0O6S0	17	14	0	6	0
307.042	20433783	C12H12N0O8S0	12	12	0	8	0
423.141	20440953	C22H24N0O7S0	22	24	0	7	0
497.09	20442219	C19H22N0O14S0	19	22	0	14	0
341.1	20496139	C17H18N0O6S0	17	18	0	6	0
451.136	20501075	C23H24N0O8S0	23	24	0	8	0
453.079	20510399	C21H18N0O10S0	21	18	0	10	0
419.074	20531849	C21H16N0O8S0	21	16	0	8	0
203.052	20535564	C6H12N0O6S0	6	12	0	6	0
355.043	20541684	C16H12N0O8S0	16	12	0	8	0
289.105	20569113	C14H18N0O5S0	14	18	0	5	0
425.048	20614486	C19H14N0O10S0	19	14	0	10	0
405.188	20617612	C20H30N0O7S0	20	30	0	7	0
435.069	18872875	C21H16N0O9S0	21	16	0	9	0
497.105	20618354	C23H22N0O11S0	23	22	0	11	0
509.09	20648651	C20H22N0O14S0	20	22	0	14	0
367.115	20713189	C19H20N0O6S0	19	20	0	6	0
348.069	13648937	C14H15N1O8S0	14	15	1	8	0
533.127	20755656	C23H26N0O13S0	23	26	0	13	0
483.111	20759277	C19H24N0O13S0	19	24	0	13	0
433.053	12000416	C21H14N0O9S0	21	14	0	9	0
483.199	20890390	C25H32N0O8S0	25	32	0	8	0
365.1	20952253	C19H18N0O6S0	19	18	0	6	0
463.048	20986937	C18H16N0O13S0	18	16	0	13	0
453.188	21047038	C24H30N0O7S0	24	30	0	7	0
463.194	18185350	C22H32N0O9S0	22	32	0	9	0
483.075	21168860	C18H20N0O14S0	18	20	0	14	0
393.058	21252186	C19H14N0O8S0	19	14	0	8	0
376.1	13810446	C16H19N1O8S0	16	19	1	8	0
405.095	21276977	C21H18N0O7S0	21	18	0	7	0
439.064	21312717	C20H16N0O10S0	20	16	0	10	0
413.105	21349997	C16H22N0O11S0	16	22	0	11	0
339.032	21455889	C12H12N0O10S0	12	12	0	10	0
461.178	44804183	C22H30N0O9S0	22	30	0	9	0
459.163	69075989	C22H28N0O9S0	22	28	0	9	0
521.09	21580478	C21H22N0O14S0	21	22	0	14	0
467.168	21587091	C24H28N0O8S0	24	28	0	8	0
543.184	21637943	C26H32N0O11S0	26	32	0	11	0
357.167	21654537	C19H26N0O5S0	19	26	0	5	0
421.126	21676323	C22H22N0O7S0	22	22	0	7	0
493.059	21714193	C19H18N0O14S0	19	18	0	14	0
331.042	21766719	C14H12N0O8S0	14	12	0	8	0
385.074	21779728	C14H18N0O11S0	14	18	0	11	0
515.116	21786255	C23H24N0O12S0	23	24	0	12	0
377.063	21794732	C19H14N0O7S0	19	14	0	7	0
371.058	21979778	C13H16N0O11S0	13	16	0	11	0
331.152	21996239	C17H24N0O5S0	17	24	0	5	0
557.199	22006209	C27H34N0O11S0	27	34	0	11	0
485.069	22042244	C21H18N0O12S0	21	18	0	12	0
469.095	22145124	C18H22N0O13S0	18	22	0	13	0
483.09	22209251	C22H20N0O11S0	22	20	0	11	0
459.199	22238248	C23H32N0O8S0	23	32	0	8	0
527.152	22271914	C25H28N0O11S0	25	28	0	11	0
495.075	22300861	C19H20N0O14S0	19	20	0	14	0
329.063	22329374	C15H14N0O7S0	15	14	0	7	0
439.173	22390037	C23H28N0O7S0	23	28	0	7	0
409.038	22407146	C15H14N0O12S0	15	14	0	12	0
455.116	22432588	C18H24N0O12S0	18	24	0	12	0
441.188	22456901	C23H30N0O7S0	23	30	0	7	0
457.147	64061375	C22H26N0O9S0	22	26	0	9	0
377.1	22716376	C20H18N0O6S0	20	18	0	6	0
381.152	22782716	C17H26N0O8S0	17	26	0	8	0
513.137	22862500	C24H26N0O11S0	24	26	0	11	0
455.131	42113876	C22H24N0O9S0	22	24	0	9	0
521.163	22969061	C23H30N0O12S0	23	30	0	12	0
527.189	23033790	C26H32N0O10S0	26	32	0	10	0
351.048	23059442	C17H12N0O7S0	17	12	0	7	0
381.131	23065315	C20H22N0O6S0	20	22	0	6	0
441.1	23149068	C17H22N0O12S0	17	22	0	12	0
521.127	23182033	C22H26N0O13S0	22	26	0	13	0
453.116	25274068	C22H22N0O9S0	22	22	0	9	0
409.09	23283738	C20H18N0O8S0	20	18	0	8	0
315.12	23334196	C16H20N0O5S0	16	20	0	5	0
519.111	23340708	C22H24N0O13S0	22	24	0	13	0
497.142	23346307	C24H26N0O10S0	24	26	0	10	0
391.079	23416781	C20H16N0O7S0	20	16	0	7	0
395.11	23429393	C20H20N0O7S0	20	20	0	7	0
467.152	23458955	C20H28N0O11S0	20	28	0	11	0
547.142	23495682	C24H28N0O13S0	24	28	0	13	0
315.084	23674123	C15H16N0O6S0	15	16	0	6	0
483.126	23700212	C23H24N0O10S0	23	24	0	10	0
511.157	23725767	C25H28N0O10S0	25	28	0	10	0
317.063	23858675	C14H14N0O7S0	14	14	0	7	0
279.084	23884054	C12H16N0O6S0	12	16	0	6	0
387.178	23887504	C20H28N0O6S0	20	28	0	6	0
399.178	23896546	C21H28N0O6S0	21	28	0	6	0
375.178	23901852	C19H28N0O6S0	19	28	0	6	0
451.1	23220798	C22H20N0O9S0	22	20	0	9	0
449.084	19148176	C22H18N0O9S0	22	18	0	9	0
559.179	24067553	C26H32N0O12S0	26	32	0	12	0
509.127	24093405	C21H26N0O13S0	21	26	0	13	0
465.173	24113296	C21H30N0O10S0	21	30	0	10	0
329.136	24168573	C17H22N0O5S0	17	22	0	5	0
351.032	24169438	C13H12N0O10S0	13	12	0	10	0
419.11	24226471	C22H20N0O7S0	22	20	0	7	0
467.095	24249453	C22H20N0O10S0	22	20	0	10	0
437.121	24260528	C22H22N0O8S0	22	22	0	8	0
349.068	24330615	C18H14N0O6S0	18	14	0	6	0
429.043	24484152	C18H14N0O11S0	18	14	0	11	0
447.069	11903177	C22H16N0O9S0	22	16	0	9	0
451.048	24703519	C17H16N0O13S0	17	16	0	13	0
513.173	24713911	C25H30N0O10S0	25	30	0	10	0
481.059	24772388	C18H18N0O14S0	18	18	0	14	0
489.064	24792525	C20H18N0O13S0	20	18	0	13	0
301.105	24839635	C15H18N0O5S0	15	18	0	5	0
305.136	24845363	C15H22N0O5S0	15	22	0	5	0
473.069	24875037	C20H18N0O12S0	20	18	0	12	0
397.162	24881569	C21H26N0O6S0	21	26	0	6	0
533.163	24900829	C24H30N0O12S0	24	30	0	12	0
503.08	24942453	C21H20N0O13S0	21	20	0	13	0
545.163	24952735	C25H30N0O12S0	25	30	0	12	0
357.058	24992631	C16H14N0O8S0	16	14	0	8	0
529.168	25005070	C25H30N0O11S0	25	30	0	11	0
363.09	25016969	C12H20N0O11S0	12	20	0	11	0
445.053	6597097	C22H14N0O9S0	22	14	0	9	0
443.037	4459246	C22H12N0O9S0	22	12	0	9	0
417.188	25125972	C21H30N0O7S0	21	30	0	7	0
477.209	11683832	C23H34N0O9S0	23	34	0	9	0
417.043	25166808	C17H14N0O11S0	17	14	0	11	0
399.09	25211271	C15H20N0O11S0	15	20	0	11	0
475.194	26698794	C23H32N0O9S0	23	32	0	9	0
393.298	25340256	C22H42N0O4S0	22	42	0	4	0
473.178	48013394	C23H30N0O9S0	23	30	0	9	0
367.043	25460359	C17H12N0O8S0	17	12	0	8	0
471.163	52010095	C23H28N0O9S0	23	28	0	9	0
455.08	25508663	C17H20N0O13S0	17	20	0	13	0
505.095	25512761	C21H22N0O13S0	21	22	0	13	0
407.11	25702605	C21H20N0O7S0	21	20	0	7	0
421.038	25702619	C16H14N0O12S0	16	14	0	12	0
531.147	25735272	C24H28N0O12S0	24	28	0	12	0
341.048	25839301	C12H14N0O10S0	12	14	0	10	0
355.079	25903397	C17H16N0O7S0	17	16	0	7	0
317.136	25923144	C16H22N0O5S0	16	22	0	5	0
427.048	25928539	C15H16N0O13S0	15	16	0	13	0
471.09	26016842	C21H20N0O11S0	21	20	0	11	0
397.038	26155293	C14H14N0O12S0	14	14	0	12	0
459.053	26182617	C19H16N0O12S0	19	16	0	12	0
519.184	26273482	C24H32N0O11S0	24	32	0	11	0
531.184	26333308	C25H32N0O11S0	25	32	0	11	0
499.121	26374180	C23H24N0O11S0	23	24	0	11	0
471.199	26397825	C24H32N0O8S0	24	32	0	8	0
411.178	26431394	C22H28N0O6S0	22	28	0	6	0
469.147	36255870	C23H26N0O9S0	23	26	0	9	0
501.1	26555337	C22H22N0O12S0	22	22	0	12	0
467.131	23938176	C23H24N0O9S0	23	24	0	9	0
485.105	26711701	C22H22N0O11S0	22	22	0	11	0
413.048	26736186	C18H14N0O10S0	18	14	0	10	0
495.147	26786015	C21H28N0O12S0	21	28	0	12	0
381.095	26870456	C19H18N0O7S0	19	18	0	7	0
447.053	26917056	C18H16N0O12S0	18	16	0	12	0
491.189	27124139	C23H32N0O10S0	23	32	0	10	0
343.152	27329016	C18H24N0O5S0	18	24	0	5	0
305.063	27382766	C13H14N0O7S0	13	14	0	7	0
487.085	27486771	C21H20N0O12S0	21	20	0	12	0
393.095	27539586	C20H18N0O7S0	20	18	0	7	0
453.152	27571945	C23H26N0O8S0	23	26	0	8	0
407.074	27648170	C20H16N0O8S0	20	16	0	8	0
427.064	27730790	C19H16N0O10S0	19	16	0	10	0
435.105	27875908	C22H20N0O8S0	22	20	0	8	0
517.132	27923099	C23H26N0O12S0	23	26	0	12	0
465.116	20865138	C23H22N0O9S0	23	22	0	9	0
399.053	28176737	C14H16N0O12S0	14	16	0	12	0
[truncated: 326 more rows]

## Sheet: SRNOM-(+)APPI
m/z	intensity	Formula	C	H	N	O	S
[truncated: 4,818 more rows]
